# Supplementary material for: Eating habits, lifestyle behaviors and stress during the COVID-19 pandemic quarantine among Peruvian adults
Source: PeerJ. 2021 May 11;9:e11431. doi: 10.7717/peerj.11431 (PMC8121059; doi:10.7717/peerj.11431)
Supplement: Supplemental Information 1 [file peerj-09-11431-s001.xlsx]

## Sheet: Database
age	sex	bmi	civil_status	wal_19	wal_20	wal_22	wal_23	wal_25	wal_26	wal_27	wal_28	wal_29	wal_30	wal_31	wal_32	wal_33	wal_34	wal_35	wal_36	wal_37	wal_38	wal_39	wal_40	sit_47	sit_50	sit_51	sit_52	sit_53	sit_54	sit_59	sit_60	sit_61	sit_62	sit_63	sit_64	sit_65	sit_66	sit_67	estr_69	estr_70	estr_71	estr_72	estr_73	estr_74	estr_75	estr_76	estr_77	wal19	wal20
26	0	25.721	Soltero(a)	Una o dos veces a la semana	Nunca	Dos a tres veces al mes	Una vez al mes	Una vez al mes	Dos a tres veces al mes	Dos a tres veces al mes	Nunca	Todos los dias	Tres a cuatro veces por semama	Una o dos veces a la semana	Dos a tres veces al mes	Tres a cuatro veces por semama	Todos los dias	Siete días	Siete días	Siete días	3	1	No	Mucho más de lo normal	0 min	31-60 min	31-60 min	31-60 min	No	0 min	5-6 h	0 min	16-30 min	30-60 min	0 min	0 min	3-4 h	0 min	Casi nunca	Casi nunca	Muy a menudo	A menudo	A menudo	Casi nunca	De vez en cuando	De vez en cuando	De vez en cuando	Una a cuatro veces por semana	Nunca
30	Mujer	31.8339	Soltero(a)	Una o dos veces a la semana	Nunca	Una vez al mes	Una o dos veces a la semana	Una o dos veces a la semana	Una o dos veces a la semana	Dos a tres veces al mes	Una vez al mes	Todos los dias	Dos a tres veces al mes	Dos a tres veces al mes	Dos a tres veces al mes	Dos a tres veces al mes	Todos los dias	Siete días	Siete días	Cinco días	4	1	Si	Mucho más de lo normal	0 min	Más de 1 h	Más de 1 h	Más de 1 h	Sí	0 min	5-6 h	0 min	0 min	30-60 min	1-2 h	0 min	0 min	0 min	De vez en cuando	De vez en cuando	A menudo	A menudo	De vez en cuando	De vez en cuando	A menudo	A menudo	Casi nunca	Una a cuatro veces por semana	Nunca
51	Mujer	27.9421	Casado(a)	Todos los dias	Nunca	Nunca	Nunca	Una o dos veces a la semana	Nunca	Una o dos veces a la semana	Nunca	Todos los dias	Todos los dias	Una o dos veces a la semana	Nunca	Todos los dias	Todos los dias	Siete días	Siete días	Siete días	2	1	Si	Más o menos igual	0 min	11-20 min	31-60 min	31-60 min	Sí	0 min	5-6 h	0 min	30-60 min	1-15 min	0 min	0 min	2-3 h	0 min	De vez en cuando	Casi nunca	De vez en cuando	Muy a menudo	A menudo	De vez en cuando	A menudo	A menudo	De vez en cuando	Todos los dias	Nunca
20	Mujer	27.5556	Soltero(a)	Tres a cuatro veces por semama	Nunca	Dos a tres veces al mes	Tres a cuatro veces por semama	Dos a tres veces al mes	Dos a tres veces al mes	Dos a tres veces al mes	Nunca	Una o dos veces a la semana	Tres a cuatro veces por semama	Dos a tres veces al mes	Una vez al mes	Una o dos veces a la semana	Tres a cuatro veces por semama	Siete días	Siete días	Seis días	4	1	Si	Mucho más de lo normal	0 min	31-60 min	31-60 min	21-30 min	No	0 min	5-6 h	0 min	0 min	30-60 min	0 min	0 min	3-4 h	0 min	A menudo	De vez en cuando	De vez en cuando	A menudo	A menudo	De vez en cuando	A menudo	De vez en cuando	Casi nunca	Una a cuatro veces por semana	Nunca
25	Mujer	27.268	Soltero(a)	Una o dos veces a la semana	Dos a tres veces al mes	Una vez al mes	Una o dos veces a la semana	Nunca	Dos a tres veces al mes	Dos a tres veces al mes	Dos a tres veces al mes	Todos los dias	Una o dos veces a la semana	Una o dos veces a la semana	Dos a tres veces al mes	Una o dos veces a la semana	Tres a cuatro veces por semama	Seis días	Seis días	Tres dias	3	1	Si	Mucho más de lo normal	16-30 min	21-30 min	31-60 min	11-20 min	Sí	0 min	5-6 h	0 min	30-60 min	0 min	0 min	16-30 min	2-3 h	0 min	De vez en cuando	A menudo	De vez en cuando	De vez en cuando	De vez en cuando	De vez en cuando	A menudo	De vez en cuando	De vez en cuando	Una a cuatro veces por semana	Una a tres veces al mes
33	Mujer	21.5019	Soltero(a)	Tres a cuatro veces por semama	Dos a tres veces al mes	Dos a tres veces al mes	Una o dos veces a la semana	Dos a tres veces al mes	Una o dos veces a la semana	Nunca	Nunca	Todos los dias	Tres a cuatro veces por semama	Una o dos veces a la semana	Dos a tres veces al mes	Nunca	Todos los dias	Siete días	Siete días	Cinco días	3	1	Si	Un poco más de lo normal	1-15 min	31-60 min	Más de 1 h	11-20 min	Sí	0 min	5-6 h	0 min	0 min	0 min	0 min	0 min	30-60 min	0 min	Muy a menudo	A menudo	Muy a menudo	De vez en cuando	De vez en cuando	Muy a menudo	De vez en cuando	De vez en cuando	A menudo	Una a cuatro veces por semana	Una a tres veces al mes
26	Mujer	21.7555	Soltero(a)	Tres a cuatro veces por semama	Nunca	Una vez al mes	Dos a tres veces al mes	Nunca	Nunca	Una o dos veces a la semana	Una o dos veces a la semana	Todos los dias	Una o dos veces a la semana	Una o dos veces a la semana	Una o dos veces a la semana	Dos a tres veces al mes	Tres a cuatro veces por semama	Dos días	Siete días	Cinco días	1	1	Si	Mucho más de lo normal	1-15 min	0 min	11-20 min	11-20 min	Sí	0 min	5-6 h	0 min	0 min	16-30 min	0 min	0 min	0 min	1-15 min	De vez en cuando	De vez en cuando	A menudo	De vez en cuando	De vez en cuando	De vez en cuando	De vez en cuando	De vez en cuando	De vez en cuando	Una a cuatro veces por semana	Nunca
47	Mujer	20.9321	Soltero(a)	Una o dos veces a la semana	Nunca	Nunca	Nunca	Nunca	Nunca	Nunca	Nunca	Todos los dias	Tres a cuatro veces por semama	Nunca	Una vez al mes	Nunca	Todos los dias	Siete días	Siete días	Siete días	3	1	Si	Mucho más de lo normal	Más de 1 hora	0 min	11-20 min	11-20 min	Sí	0 min	5-6 h	0 min	30-60 min	0 min	0 min	0 min	16-30 min	3-4 h	Casi nunca	De vez en cuando	A menudo	A menudo	A menudo	De vez en cuando	A menudo	De vez en cuando	De vez en cuando	Una a cuatro veces por semana	Nunca
52	Mujer	23.833	Separado(a)	Una vez al mes	Nunca	Nunca	Nunca	Nunca	Nunca	Una vez al mes	Nunca	Tres a cuatro veces por semama	Una vez al mes	Nunca	Una vez al mes	Tres a cuatro veces por semama	Tres a cuatro veces por semama	Siete días	Cuatro días	Cuatro días	3	0	Si	Mucho menos de lo normal	0 min	11-20 min	11-20 min	11-20 min	Sí	0 min	6-7 h	0 min	3-4 h	2-3 h	0 min	0 min	1-2 h	3-4 h	De vez en cuando	Casi nunca	De vez en cuando	A menudo	A menudo	Casi nunca	A menudo	A menudo	Casi nunca	Una a tres veces al mes	Nunca
26	Mujer	20.2449	Soltero(a)	Una o dos veces a la semana	Dos a tres veces al mes	Dos a tres veces al mes	Una o dos veces a la semana	Dos a tres veces al mes	Dos a tres veces al mes	Una vez al mes	Nunca	Todos los dias	Una o dos veces a la semana	Dos a tres veces al mes	Una vez al mes	Dos a tres veces al mes	Tres a cuatro veces por semama	Siete días	Siete días	Siete días	3	0	No	Mucho más de lo normal	16-30 min	11-20 min	21-30 min	11-20 min	Sí	0 min	6-7 h	0 min	16-30 min	30-60 min	16-30 min	16-30 min	3-4 h	0 min	De vez en cuando	De vez en cuando	De vez en cuando	De vez en cuando	De vez en cuando	De vez en cuando	A menudo	De vez en cuando	De vez en cuando	Una a cuatro veces por semana	Una a tres veces al mes
23	Mujer	24.1415	Soltero(a)	Todos los dias	Nunca	Tres a cuatro veces por semama	Dos a tres veces al mes	Dos a tres veces al mes	Dos a tres veces al mes	Dos a tres veces al mes	Una vez al mes	Todos los dias	Todos los dias	Nunca	Nunca	Una vez al mes	Todos los dias	Cuatro días	Cuatro días	Cuatro días	3	2	Si	Un poco más de lo normal	Más de 1 hora	11-20 min	21-30 min	21-30 min	Sí	0 min	6-7 h	0 min	2-3 h	1-2 h	2-3 h	0 min	2-3 h	1-2 h	De vez en cuando	De vez en cuando	Casi nunca	A menudo	A menudo	De vez en cuando	A menudo	A menudo	Casi nunca	Todos los dias	Nunca
18	Mujer	20.5688	Soltero(a)	Tres a cuatro veces por semama	Nunca	Nunca	Nunca	Nunca	Nunca	Una vez al mes	Nunca	Todos los dias	Todos los dias	Dos a tres veces al mes	Una o dos veces a la semana	Una o dos veces a la semana	Todos los dias	Siete días	Siete días	Siete días	3	1	No	Mucho más de lo normal	0 min	11-20 min	11-20 min	11-20 min	Sí	0 min	6-7 h	0 min	0 min	30-60 min	0 min	0 min	3-4 h	0 min	Casi nunca	Casi nunca	A menudo	A menudo	A menudo	Casi nunca	A menudo	A menudo	De vez en cuando	Una a cuatro veces por semana	Nunca
26	Mujer	28.125	Soltero(a)	Una vez al mes	Dos a tres veces al mes	Una vez al mes	Una vez al mes	Una vez al mes	Nunca	Nunca	Nunca	Todos los dias	Una vez al mes	Dos a tres veces al mes	Una vez al mes	Dos a tres veces al mes	Todos los dias	Siete días	Siete días	Siete días	3	0	Si	Más o menos igual	0 min	31-60 min	31-60 min	31-60 min	Sí	0 min	6-7 h	0 min	0 min	0 min	0 min	0 min	0 min	1-15 min	Casi nunca	Casi nunca	Casi nunca	A menudo	A menudo	Casi nunca	A menudo	A menudo	Casi nunca	Una a tres veces al mes	Una a tres veces al mes
21	Mujer	28.1943	Soltero(a)	Tres a cuatro veces por semama	Nunca	Todos los dias	Tres a cuatro veces por semama	Tres a cuatro veces por semama	Tres a cuatro veces por semama	Dos a tres veces al mes	Nunca	Tres a cuatro veces por semama	Tres a cuatro veces por semama	Tres a cuatro veces por semama	Tres a cuatro veces por semama	Dos a tres veces al mes	Todos los dias	Un dia	Siete días	Siete días	2	2	No	Mucho más de lo normal	Más de 1 hora	0 min	11-20 min	11-20 min	No	0 min	Más de 7 h	0 min	0 min	16-30 min	0 min	1-2 h	1-2 h	0 min	De vez en cuando	A menudo	De vez en cuando	Casi nunca	Casi nunca	A menudo	De vez en cuando	De vez en cuando	De vez en cuando	Una a cuatro veces por semana	Nunca
34	Mujer	21.3382	Soltero(a)	Todos los dias	Nunca	Nunca	Dos a tres veces al mes	Nunca	Dos a tres veces al mes	Una vez al mes	Una vez al mes	Dos a tres veces al mes	Todos los dias	Todos los dias	Dos a tres veces al mes	Todos los dias	Una o dos veces a la semana	Siete días	Siete días	Siete días	3	2	Si	Más o menos igual	1-15 min	11-20 min	11-20 min	11-20 min	Sí	0 min	Más de 7 h	0 min	1-2 h	30-60 min	1-2 h	0 min	2-3 h	0 min	A menudo	De vez en cuando	A menudo	A menudo	A menudo	A menudo	A menudo	A menudo	De vez en cuando	Todos los dias	Nunca
31	Mujer	26.5021	Soltero(a)	Dos a tres veces al mes	Tres a cuatro veces por semama	Dos a tres veces al mes	Nunca	Todos los dias	Tres a cuatro veces por semama	Dos a tres veces al mes	Dos a tres veces al mes	Todos los dias	Dos a tres veces al mes	Dos a tres veces al mes	Una o dos veces a la semana	Dos a tres veces al mes	Todos los dias	Un dia	Siete días	Un dia	2	0	Si	Un poco más de lo normal	16-30 min	0 min	11-20 min	11-20 min	Sí	0 min	Más de 7 h	0 min	16-30 min	30-60 min	0 min	1-2 h	1-2 h	30-60 min	Casi nunca	Casi nunca	Casi nunca	A menudo	A menudo	Casi nunca	A menudo	A menudo	Casi nunca	Una a tres veces al mes	Una a cuatro veces por semana
26	Mujer	20.5457	Soltero(a)	Dos a tres veces al mes	Una o dos veces a la semana	Dos a tres veces al mes	Una vez al mes	Dos a tres veces al mes	Dos a tres veces al mes	Nunca	Nunca	Todos los dias	Una vez al mes	Nunca	Nunca	Tres a cuatro veces por semama	Tres a cuatro veces por semama	Seis días	Siete días	Cinco días	2	0	Si	Mucho más de lo normal	0 min	21-30 min	31-60 min	11-20 min	Sí	0 min	Más de 7 h	0 min	1-2 h	0 min	16-30 min	0 min	16-30 min	0 min	Muy a menudo	Muy a menudo	Muy a menudo	A menudo	Casi nunca	De vez en cuando	De vez en cuando	De vez en cuando	De vez en cuando	Una a tres veces al mes	Una a cuatro veces por semana
30	Mujer	25.721	Soltero(a)	Todos los dias	Nunca	Una vez al mes	Una o dos veces a la semana	Nunca	Nunca	Dos a tres veces al mes	Nunca	Todos los dias	Dos a tres veces al mes	Tres a cuatro veces por semama	Dos a tres veces al mes	Dos a tres veces al mes	Tres a cuatro veces por semama	Siete días	Siete días	Siete días	3	2	Si	Un poco más de lo normal	0 min	21-30 min	21-30 min	21-30 min	Sí	0 min	Más de 7 h	0 min	0 min	30-60 min	16-30 min	0 min	3-4 h	0 min	A menudo	A menudo	Muy a menudo	De vez en cuando	De vez en cuando	A menudo	De vez en cuando	De vez en cuando	A menudo	Todos los dias	Nunca
21	Mujer	23.4375	Soltero(a)	Todos los dias	Una o dos veces a la semana	Dos a tres veces al mes	Todos los dias	Una vez al mes	Todos los dias	Nunca	Nunca	Todos los dias	Una vez al mes	Una vez al mes	Nunca	Tres a cuatro veces por semama	Todos los dias	Seis días	Siete días	Cuatro días	3	3	Si	Un poco más de lo normal	Más de 1 hora	21-30 min	21-30 min	11-20 min	Sí	0 min	Más de 7 h	0 min	3-4 h	1-15 min	0 min	30-60 min	0 min	0 min	Nunca	Muy a menudo	A menudo	Casi nunca	De vez en cuando	A menudo	De vez en cuando	De vez en cuando	A menudo	Todos los dias	Una a cuatro veces por semana
20	Hombre	23.0518	Soltero(a)	Dos a tres veces al mes	Una vez al mes	Nunca	Una vez al mes	Nunca	Nunca	Una vez al mes	Nunca	Todos los dias	Una vez al mes	Una vez al mes	Dos a tres veces al mes	Una vez al mes	Nunca	Siete días	Siete días	Siete días	3	1	No	Un poco más de lo normal	16-30 min	1-10 min	21-30 min	11-20 min	Sí	0 min	Más de 7 h	0 min	3-4 h	1-15 min	0 min	0 min	1-15 min	30-60 min	Casi nunca	A menudo	A menudo	Nunca	De vez en cuando	Casi nunca	Casi nunca	Casi nunca	De vez en cuando	Una a tres veces al mes	Una a tres veces al mes
24	Mujer	27.9421	Soltero(a)	Una o dos veces a la semana	Todos los dias	Nunca	Nunca	Todos los dias	Todos los dias	Una o dos veces a la semana	Dos a tres veces al mes	Todos los dias	Una o dos veces a la semana	Una o dos veces a la semana	Una o dos veces a la semana	Dos a tres veces al mes	Nunca	Un dia	Siete días	Siete días	2	0	Si	Mucho menos de lo normal	Más de 1 hora	0 min	31-60 min	31-60 min	No	0 min	Más de 7 h	0 min	0 min	0 min	0 min	0 min	1-2 h	0 min	Muy a menudo	A menudo	A menudo	De vez en cuando	A menudo	A menudo	A menudo	A menudo	A menudo	Una a cuatro veces por semana	Todos los dias
21	Hombre	31.8878	Soltero(a)	Una vez al mes	Nunca	Una o dos veces a la semana	Una o dos veces a la semana	Una o dos veces a la semana	Todos los dias	Una vez al mes	Tres a cuatro veces por semama	Todos los dias	Tres a cuatro veces por semama	Todos los dias	Tres a cuatro veces por semama	Tres a cuatro veces por semama	Todos los dias	Un dia	Siete días	Tres dias	2	2	Si	Mucho más de lo normal	31-60 min	0 min	21-30 min	11-20 min	Sí	0 min	Más de 7 h	0 min	3-4 h	3-4 h	0 min	0 min	3-4 h	2-3 h	De vez en cuando	De vez en cuando	De vez en cuando	A menudo	Muy a menudo	Casi nunca	A menudo	A menudo	Nunca	Una a tres veces al mes	Nunca
29	Mujer	19.1111	Soltero(a)	Una o dos veces a la semana	Nunca	Una vez al mes	Dos a tres veces al mes	Una vez al mes	Una vez al mes	Nunca	Nunca	Todos los dias	Una vez al mes	Dos a tres veces al mes	Una vez al mes	Nunca	Todos los dias	Siete días	Siete días	Siete días	3	1	Si	Mucho más de lo normal	1-15 min	1-10 min	1-10 min	1-10 min	No	0 min	Más de 7 h	0 min	0 min	0 min	0 min	0 min	3-4 h	0 min	A menudo	De vez en cuando	De vez en cuando	A menudo	A menudo	Casi nunca	A menudo	A menudo	Casi nunca	Una a cuatro veces por semana	Nunca
28	Mujer	31.25	Casado(a)	Todos los dias	Nunca	Nunca	Una vez al mes	Tres a cuatro veces por semama	Dos a tres veces al mes	Una vez al mes	Nunca	Tres a cuatro veces por semama	Todos los dias	Todos los dias	Todos los dias	Una o dos veces a la semana	Todos los dias	Siete días	Siete días	Siete días	3	2	Si	Mucho más de lo normal	0 min	31-60 min	31-60 min	31-60 min	Sí	0 min	Más de 7 h	0 min	0 min	0 min	0 min	0 min	0 min	3-4 h	De vez en cuando	A menudo	Muy a menudo	De vez en cuando	De vez en cuando	De vez en cuando	A menudo	De vez en cuando	De vez en cuando	Todos los dias	Nunca
27	Mujer	26.4855	Soltero(a)	Todos los dias	Nunca	Nunca	Tres a cuatro veces por semama	Una vez al mes	Dos a tres veces al mes	Una vez al mes	Dos a tres veces al mes	Todos los dias	Tres a cuatro veces por semama	Tres a cuatro veces por semama	Tres a cuatro veces por semama	Una vez al mes	Dos a tres veces al mes	Siete días	Siete días	Siete días	3	2	No	Mucho más de lo normal	16-30 min	11-20 min	11-20 min	1-10 min	Sí	0 min	Más de 7 h	1-2 h	1-15 min	0 min	0 min	16-30 min	3-4 h	0 min	Casi nunca	Casi nunca	Casi nunca	A menudo	A menudo	Casi nunca	A menudo	A menudo	Nunca	Todos los dias	Nunca
32	Mujer	21.0962	Soltero(a)	Todos los dias	Nunca	Nunca	Dos a tres veces al mes	Nunca	Nunca	Dos a tres veces al mes	Nunca	Todos los dias	Dos a tres veces al mes	Dos a tres veces al mes	Dos a tres veces al mes	Una o dos veces a la semana	Todos los dias	Cuatro días	Cuatro días	Cuatro días	3	1	Si	Un poco más de lo normal	Más de 1 hora	21-30 min	Más de 1 h	11-20 min	Sí	1-15 min	6-7 h	0 min	1-15 min	0 min	0 min	0 min	0 min	0 min	Casi nunca	De vez en cuando	De vez en cuando	A menudo	A menudo	De vez en cuando	A menudo	A menudo	Casi nunca	Todos los dias	Nunca
47	Mujer	25.2994	Casado(a)	Tres a cuatro veces por semama	Nunca	Nunca	Una o dos veces a la semana	Dos a tres veces al mes	Nunca	Una o dos veces a la semana	Nunca	Tres a cuatro veces por semama	Todos los dias	Nunca	Nunca	Todos los dias	Una vez al mes	Siete días	Siete días	Tres dias	2	2	Si	Mucho más de lo normal	0 min	11-20 min	21-30 min	11-20 min	Sí	1-15 min	6-7 h	0 min	0 min	0 min	0 min	0 min	0 min	0 min	A menudo	De vez en cuando	A menudo	De vez en cuando	A menudo	De vez en cuando	A menudo	De vez en cuando	De vez en cuando	Una a cuatro veces por semana	Nunca
25	Mujer	39.8438	Casado(a)	Dos a tres veces al mes	Dos a tres veces al mes	Una vez al mes	Una vez al mes	Tres a cuatro veces por semama	Una o dos veces a la semana	Tres a cuatro veces por semana	Una o dos veces a la semana	Todos los dias	Todos los dias	Todos los dias	Todos los dias	Todos los dias	Todos los dias	Cinco días	Siete días	Siete días	3	1	No	Un poco más de lo normal	31-60 min	21-30 min	21-30 min	21-30 min	No	1-15 min	Más de 7 h	0 min	0 min	16-30 min	3-4 h	0 min	1-2 h	3-4 h	Muy a menudo	Muy a menudo	Muy a menudo	A menudo	A menudo	Muy a menudo	A menudo	De vez en cuando	De vez en cuando	Una a tres veces al mes	Una a tres veces al mes
30	Mujer	41.6651	Soltero(a)	Tres a cuatro veces por semama	Nunca	Dos a tres veces al mes	Una o dos veces a la semana	Nunca	Una vez al mes	Una vez al mes	Una o dos veces a la semana	Tres a cuatro veces por semama	Una o dos veces a la semana	Una o dos veces a la semana	Una o dos veces a la semana	Tres a cuatro veces por semama	Una o dos veces a la semana	Tres dias	Siete días	Siete días	2	2	No	Un poco más de lo normal	Más de 1 hora	1-10 min	31-60 min	21-30 min	Sí	1-15 min	Más de 7 h	0 min	3-4 h	2-3 h	0 min	0 min	3-4 h	3-4 h	Muy a menudo	A menudo	A menudo	A menudo	A menudo	Muy a menudo	A menudo	Casi nunca	Casi nunca	Una a cuatro veces por semana	Nunca
33	Mujer	31.25	Casado(a)	Todos los dias	Nunca	Nunca	Nunca	Nunca	Nunca	Una vez al mes	Una vez al mes	Todos los dias	Todos los dias	Una vez al mes	Nunca	Una o dos veces a la semana	Tres a cuatro veces por semama	Siete días	Siete días	Siete días	3	2	Si	Mucho menos de lo normal	0 min	21-30 min	31-60 min	21-30 min	No	1-15 min	Más de 7 h	0 min	1-15 min	3-4 h	3-4 h	0 min	0 min	0 min	De vez en cuando	Nunca	De vez en cuando	Muy a menudo	Muy a menudo	Muy a menudo	Muy a menudo	A menudo	Casi nunca	Todos los dias	Nunca
20	Mujer	22.4059	Soltero(a)	Tres a cuatro veces por semama	Tres a cuatro veces por semama	Nunca	Una o dos veces a la semana	Todos los dias	Tres a cuatro veces por semama	Nunca	Nunca	Todos los dias	Todos los dias	Tres a cuatro veces por semama	Nunca	Una vez al mes	Todos los dias	Siete días	Siete días	Tres dias	2	2	Si	Mucho más de lo normal	0 min	1-10 min	1-10 min	1-10 min	Sí	1-15 min	Más de 7 h	0 min	30-60 min	0 min	0 min	16-30 min	2-3 h	0 min	De vez en cuando	Muy a menudo	A menudo	De vez en cuando	De vez en cuando	A menudo	A menudo	A menudo	A menudo	Una a cuatro veces por semana	Una a cuatro veces por semana
22	Hombre	35.4172	Soltero(a)	Todos los dias	Nunca	Tres a cuatro veces por semama	Una o dos veces a la semana	Nunca	Nunca	Todos los dias	Tres a cuatro veces por semama	Dos a tres veces al mes	Una vez al mes	Todos los dias	Tres a cuatro veces por semama	Todos los dias	Una o dos veces a la semana	Siete días	Siete días	Siete días	3	3	No	Un poco más de lo normal	Más de 1 hora	11-20 min	11-20 min	1-10 min	Sí	1-15 min	Más de 7 h	5-6 h	1-15 min	16-30 min	0 min	0 min	2-3 h	2-3 h	De vez en cuando	De vez en cuando	De vez en cuando	A menudo	A menudo	De vez en cuando	A menudo	Muy a menudo	Casi nunca	Todos los dias	Nunca
22	Mujer	22.1893	Soltero(a)	Una vez al mes	Tres a cuatro veces por semama	Una vez al mes	Dos a tres veces al mes	Una o dos veces a la semana	Dos a tres veces al mes	Dos a tres veces al mes	Una vez al mes	Una o dos veces a la semana	Tres a cuatro veces por semama	Dos a tres veces al mes	Dos a tres veces al mes	Tres a cuatro veces por semama	Una o dos veces a la semana	Cuatro días	Siete días	Cinco días	3	0	Si	Un poco más de lo normal	1-15 min	11-20 min	11-20 min	21-30 min	Sí	1-2 h	5-6 h	0 min	1-15 min	30-60 min	30-60 min	0 min	3-4 h	0 min	A menudo	A menudo	A menudo	A menudo	A menudo	A menudo	De vez en cuando	De vez en cuando	De vez en cuando	Una a tres veces al mes	Una a cuatro veces por semana
52	Mujer	28.251	Separado(a)	Una o dos veces a la semana	Nunca	Una vez al mes	Una vez al mes	Nunca	Nunca	Dos a tres veces al mes	Una vez al mes	Tres a cuatro veces por semama	Una o dos veces a la semana	Dos a tres veces al mes	Nunca	Todos los dias	Todos los dias	Siete días	Siete días	Siete días	3	1	No	Mucho más de lo normal	0 min	21-30 min	31-60 min	31-60 min	Sí	1-2 h	5-6 h	0 min	0 min	3-4 h	0 min	1-2 h	3-4 h	3-4 h	De vez en cuando	Casi nunca	De vez en cuando	Muy a menudo	A menudo	Casi nunca	A menudo	A menudo	Casi nunca	Una a cuatro veces por semana	Nunca
28	Mujer	23.3091	Casado(a)	Una o dos veces a la semana	Nunca	Dos a tres veces al mes	Dos a tres veces al mes	Una o dos veces a la semana	Una o dos veces a la semana	Una vez al mes	Nunca	Todos los dias	Todos los dias	Tres a cuatro veces por semama	Tres a cuatro veces por semama	Dos a tres veces al mes	Todos los dias	Siete días	Siete días	Siete días	3	0	Si	Un poco más de lo normal	0 min	11-20 min	21-30 min	11-20 min	Sí	1-2 h	5-6 h	0 min	0 min	2-3 h	0 min	0 min	0 min	0 min	De vez en cuando	De vez en cuando	De vez en cuando	Muy a menudo	A menudo	Casi nunca	A menudo	A menudo	Casi nunca	Una a cuatro veces por semana	Nunca
24	Mujer	19.2894	Soltero(a)	Tres a cuatro veces por semama	Nunca	Dos a tres veces al mes	Una vez al mes	Una vez al mes	Una vez al mes	Nunca	Nunca	Todos los dias	Una o dos veces a la semana	Una o dos veces a la semana	Dos a tres veces al mes	Una o dos veces a la semana	Todos los dias	Cuatro días	Cuatro días	Cuatro días	3	2	No	Mucho más de lo normal	0 min	21-30 min	21-30 min	21-30 min	Sí	1-2 h	5-6 h	0 min	1-2 h	0 min	0 min	0 min	0 min	0 min	De vez en cuando	A menudo	A menudo	De vez en cuando	De vez en cuando	A menudo	De vez en cuando	De vez en cuando	De vez en cuando	Una a cuatro veces por semana	Nunca
47	Mujer	24.2188	Casado(a)	Una vez al mes	Una vez al mes	Nunca	Una vez al mes	Una vez al mes	Dos a tres veces al mes	Una o dos veces a la semana	Nunca	Todos los dias	Una o dos veces a la semana	Una o dos veces a la semana	Una vez al mes	Una vez al mes	Todos los dias	Siete días	Siete días	Cinco días	2	0	Si	Mucho más de lo normal	16-30 min	11-20 min	1-10 min	11-20 min	Sí	1-2 h	5-6 h	0 min	0 min	0 min	0 min	1-2 h	16-30 min	0 min	Casi nunca	Casi nunca	De vez en cuando	A menudo	A menudo	De vez en cuando	A menudo	De vez en cuando	Casi nunca	Una a tres veces al mes	Una a tres veces al mes
33	Mujer	24.1633	Soltero(a)	Dos a tres veces al mes	Nunca	Una vez al mes	Dos a tres veces al mes	Nunca	Tres a cuatro veces por semama	Una vez al mes	Una vez al mes	Todos los dias	Una o dos veces a la semana	Dos a tres veces al mes	Una vez al mes	Todos los dias	Todos los dias	Cuatro días	Siete días	Siete días	3	1	No	Mucho menos de lo normal	16-30 min	0 min	11-20 min	11-20 min	Sí	1-2 h	5-6 h	0 min	1-2 h	3-4 h	0 min	0 min	3-4 h	16-30 min	De vez en cuando	De vez en cuando	Muy a menudo	De vez en cuando	Casi nunca	De vez en cuando	A menudo	Casi nunca	A menudo	Una a tres veces al mes	Nunca
35	Hombre	27.7489	Soltero(a)	Dos a tres veces al mes	Tres a cuatro veces por semama	Una o dos veces a la semana	Dos a tres veces al mes	Una vez al mes	Dos a tres veces al mes	Nunca	Nunca	Todos los dias	Dos a tres veces al mes	Dos a tres veces al mes	Dos a tres veces al mes	Una o dos veces a la semana	Dos a tres veces al mes	Un dia	Siete días	Siete días	2	1	Si	Mucho más de lo normal	0 min	0 min	11-20 min	11-20 min	Sí	1-2 h	5-6 h	3-4 h	0 min	1-15 min	0 min	30-60 min	30-60 min	16-30 min	De vez en cuando	De vez en cuando	A menudo	De vez en cuando	De vez en cuando	De vez en cuando	De vez en cuando	De vez en cuando	De vez en cuando	Una a tres veces al mes	Una a cuatro veces por semana
45	Mujer	25.3155	Casado(a)	Tres a cuatro veces por semama	Nunca	Una vez al mes	Una vez al mes	Una vez al mes	Una vez al mes	Una vez al mes	Nunca	Todos los dias	Todos los dias	Una vez al mes	Una vez al mes	Todos los dias	Una o dos veces a la semana	Siete días	Siete días	Cinco días	3	1	Si	Un poco más de lo normal	16-30 min	21-30 min	31-60 min	21-30 min	Sí	1-2 h	6-7 h	0 min	30-60 min	0 min	0 min	0 min	16-30 min	30-60 min	Casi nunca	Casi nunca	Casi nunca	Muy a menudo	Muy a menudo	Casi nunca	Muy a menudo	A menudo	Casi nunca	Una a cuatro veces por semana	Nunca
37	Hombre	24.5089	Soltero(a)	Una o dos veces a la semana	Dos a tres veces al mes	Nunca	Una o dos veces a la semana	Dos a tres veces al mes	Dos a tres veces al mes	Dos a tres veces al mes	Nunca	Todos los dias	Todos los dias	Todos los dias	Tres a cuatro veces por semama	Tres a cuatro veces por semama	Tres a cuatro veces por semama	Seis días	Siete días	Cuatro días	2	2	Si	Un poco más de lo normal	16-30 min	11-20 min	11-20 min	11-20 min	Sí	1-2 h	6-7 h	0 min	0 min	1-2 h	0 min	30-60 min	30-60 min	30-60 min	De vez en cuando	De vez en cuando	De vez en cuando	A menudo	De vez en cuando	De vez en cuando	A menudo	Casi nunca	De vez en cuando	Una a cuatro veces por semana	Una a tres veces al mes
43	Mujer	28.3039	Casado(a)	Tres a cuatro veces por semama	Nunca	Nunca	Dos a tres veces al mes	Una vez al mes	Nunca	Una vez al mes	Nunca	Todos los dias	Una o dos veces a la semana	Una o dos veces a la semana	Una vez al mes	Todos los dias	Todos los dias	Un dia	Un dia	Un dia	3	1	Si	Mucho más de lo normal	0 min	21-30 min	31-60 min	21-30 min	Sí	1-2 h	6-7 h	0 min	30-60 min	1-2 h	0 min	0 min	30-60 min	3-4 h	Casi nunca	Nunca	De vez en cuando	Muy a menudo	Muy a menudo	Casi nunca	Muy a menudo	Muy a menudo	Nunca	Una a cuatro veces por semana	Nunca
42	Mujer	23.4236	Casado(a)	Una o dos veces a la semana	Nunca	Dos a tres veces al mes	Una vez al mes	Nunca	Nunca	Todos los dias	Nunca	Todos los dias	Dos a tres veces al mes	Una vez al mes	Una vez al mes	Todos los dias	Todos los dias	Siete días	Siete días	Siete días	3	2	Si	Un poco más de lo normal	0 min	11-20 min	31-60 min	21-30 min	Sí	1-2 h	6-7 h	0 min	0 min	16-30 min	0 min	30-60 min	16-30 min	1-2 h	Nunca	Casi nunca	De vez en cuando	A menudo	Muy a menudo	Casi nunca	A menudo	A menudo	Nunca	Una a cuatro veces por semana	Nunca
41	Mujer	29.0698	Soltero(a)	Una o dos veces a la semana	Nunca	Nunca	Nunca	Tres a cuatro veces por semama	Dos a tres veces al mes	Dos a tres veces al mes	Nunca	Todos los dias	Todos los dias	Todos los dias	Una o dos veces a la semana	Todos los dias	Todos los dias	Siete días	Siete días	Cuatro días	3	2	Si	Mucho más de lo normal	0 min	11-20 min	21-30 min	21-30 min	No	1-2 h	6-7 h	1-2 h	16-30 min	0 min	0 min	0 min	16-30 min	16-30 min	De vez en cuando	De vez en cuando	De vez en cuando	De vez en cuando	De vez en cuando	De vez en cuando	A menudo	De vez en cuando	Casi nunca	Una a cuatro veces por semana	Nunca
34	Hombre	24.0569	Casado(a)	Una o dos veces a la semana	Nunca	Una o dos veces a la semana	Nunca	Dos a tres veces al mes	Dos a tres veces al mes	Una vez al mes	Nunca	Todos los dias	Dos a tres veces al mes	Una o dos veces a la semana	Una o dos veces a la semana	Tres a cuatro veces por semama	Todos los dias	Siete días	Siete días	Siete días	3	0	Si	Un poco más de lo normal	31-60 min	1-10 min	11-20 min	11-20 min	Sí	1-2 h	6-7 h	1-2 h	0 min	0 min	0 min	0 min	30-60 min	0 min	De vez en cuando	De vez en cuando	A menudo	A menudo	De vez en cuando	De vez en cuando	A menudo	De vez en cuando	De vez en cuando	Una a cuatro veces por semana	Nunca
33	Mujer	41.9132	Soltero(a)	Todos los dias	Nunca	Nunca	Una o dos veces a la semana	Nunca	Una vez al mes	Dos a tres veces al mes	Dos a tres veces al mes	Todos los dias	Dos a tres veces al mes	Una o dos veces a la semana	Dos a tres veces al mes	Una o dos veces a la semana	Todos los dias	Dos días	Un dia	Un dia	3	1	Si	Mucho más de lo normal	0 min	1-10 min	21-30 min	11-20 min	Sí	1-2 h	Más de 7 h	0 min	1-2 h	2-3 h	0 min	3-4 h	3-4 h	3-4 h	Muy a menudo	De vez en cuando	A menudo	A menudo	A menudo	Casi nunca	A menudo	A menudo	De vez en cuando	Todos los dias	Nunca
22	Mujer	29.3878	Soltero(a)	Una o dos veces a la semana	Nunca	Una vez al mes	Una vez al mes	Todos los dias	Todos los dias	Una o dos veces a la semana	Una vez al mes	Todos los dias	Todos los dias	Todos los dias	Todos los dias	Una vez al mes	Todos los dias	Seis días	Siete días	Seis días	3	1	No	Mucho más de lo normal	Más de 1 hora	31-60 min	21-30 min	11-20 min	Sí	1-2 h	Más de 7 h	0 min	16-30 min	16-30 min	0 min	1-15 min	1-15 min	3-4 h	Muy a menudo	Muy a menudo	A menudo	De vez en cuando	Casi nunca	A menudo	De vez en cuando	Casi nunca	A menudo	Una a cuatro veces por semana	Nunca
27	Mujer	37.1094	Soltero(a)	Todos los dias	Nunca	Una vez al mes	Nunca	Nunca	Una o dos veces a la semana	Nunca	Una o dos veces a la semana	Una o dos veces a la semana	Todos los dias	Nunca	Dos a tres veces al mes	Todos los dias	Una o dos veces a la semana	Siete días	Siete días	Siete días	5	1	No	Mucho más de lo normal	0 min	1-10 min	11-20 min	1-10 min	Sí	1-2 h	Más de 7 h	0 min	0 min	0 min	0 min	0 min	3-4 h	3-4 h	Nunca	Nunca	A menudo	Muy a menudo	A menudo	Casi nunca	A menudo	A menudo	De vez en cuando	Todos los dias	Nunca
29	Mujer	23.2335	Soltero(a)	Nunca	Nunca	Tres a cuatro veces por semama	Una vez al mes	Una vez al mes	Dos a tres veces al mes	Una o dos veces a la semana	Nunca	Una o dos veces a la semana	Una o dos veces a la semana	Una vez al mes	Una o dos veces a la semana	Una o dos veces a la semana	Tres a cuatro veces por semama	Seis días	Siete días	Siete días	3	0	Si	Mucho más de lo normal	1-15 min	1-10 min	21-30 min	31-60 min	Sí	1-2 h	Más de 7 h	0 min	0 min	16-30 min	0 min	0 min	1-2 h	0 min	Casi nunca	Casi nunca	De vez en cuando	De vez en cuando	De vez en cuando	A menudo	De vez en cuando	De vez en cuando	De vez en cuando	Nunca	Nunca
28	Mujer	35.3798	Soltero(a)	Tres a cuatro veces por semama	Una vez al mes	Dos a tres veces al mes	Una o dos veces a la semana	Una vez al mes	Una o dos veces a la semana	Dos a tres veces al mes	Dos a tres veces al mes	Una o dos veces a la semana	Tres a cuatro veces por semama	Dos a tres veces al mes	Dos a tres veces al mes	Una o dos veces a la semana	Tres a cuatro veces por semama	Seis días	Siete días	Seis días	3	1	No	Mucho más de lo normal	0 min	21-30 min	Más de 1 h	31-60 min	Sí	1-2 h	Más de 7 h	0 min	1-15 min	16-30 min	0 min	1-2 h	0 min	1-2 h	De vez en cuando	A menudo	De vez en cuando	A menudo	De vez en cuando	De vez en cuando	De vez en cuando	De vez en cuando	De vez en cuando	Una a cuatro veces por semana	Una a tres veces al mes
25	Mujer	34.7209	Soltero(a)	Todos los dias	Nunca	Todos los dias	Todos los dias	Todos los dias	Todos los dias	Dos a tres veces al mes	Nunca	Todos los dias	Tres a cuatro veces por semama	Tres a cuatro veces por semama	Todos los dias	Dos a tres veces al mes	Todos los dias	Siete días	Siete días	Seis días	4	3	Si	Mucho más de lo normal	Más de 1 hora	Más de 1 h	Más de 1 h	Más de 1 h	Sí	1-2 h	Más de 7 h	0 min	0 min	1-2 h	0 min	0 min	30-60 min	3-4 h	A menudo	De vez en cuando	Muy a menudo	De vez en cuando	De vez en cuando	A menudo	De vez en cuando	De vez en cuando	A menudo	Todos los dias	Nunca
25	Mujer	21.4844	Soltero(a)	Una o dos veces a la semana	Tres a cuatro veces por semama	Dos a tres veces al mes	Dos a tres veces al mes	Dos a tres veces al mes	Una vez al mes	Nunca	Una o dos veces a la semana	Todos los dias	Una o dos veces a la semana	Dos a tres veces al mes	Una vez al mes	Tres a cuatro veces por semama	Todos los dias	Tres dias	Siete días	Cinco días	2	1	No	Mucho más de lo normal	16-30 min	11-20 min	21-30 min	31-60 min	Sí	1-2 h	Más de 7 h	0 min	0 min	1-15 min	0 min	0 min	1-15 min	1-2 h	De vez en cuando	A menudo	De vez en cuando	De vez en cuando	De vez en cuando	De vez en cuando	A menudo	Casi nunca	Casi nunca	Una a cuatro veces por semana	Una a cuatro veces por semana
48	Mujer	28.8754	Casado(a)	Todos los dias	Nunca	Una vez al mes	Una o dos veces a la semana	Nunca	Todos los dias	Nunca	Nunca	Todos los dias	Todos los dias	Dos a tres veces al mes	Una vez al mes	Todos los dias	Todos los dias	Siete días	Siete días	Tres dias	2	2	Si	Mucho más de lo normal	31-60 min	1-10 min	11-20 min	1-10 min	Sí	1-2 h	Más de 7 h	0 min	0 min	0 min	0 min	0 min	0 min	0 min	De vez en cuando	Casi nunca	De vez en cuando	A menudo	Muy a menudo	De vez en cuando	A menudo	A menudo	Casi nunca	Todos los dias	Nunca
23	Mujer	23.1084	Soltero(a)	Una o dos veces a la semana	Una vez al mes	Una vez al mes	Una vez al mes	Una vez al mes	Nunca	Una o dos veces a la semana	Nunca	Todos los dias	Una vez al mes	Una vez al mes	Una vez al mes	Dos a tres veces al mes	Todos los dias	Siete días	Siete días	Siete días	3	1	No	Mucho más de lo normal	0 min	11-20 min	11-20 min	11-20 min	Sí	1-2 h	Más de 7 h	0 min	1-15 min	1-15 min	0 min	0 min	1-15 min	0 min	Nunca	Nunca	Casi nunca	A menudo	A menudo	Casi nunca	A menudo	A menudo	Casi nunca	Una a cuatro veces por semana	Una a tres veces al mes
57	Mujer	31.9922	Casado(a)	Nunca	Una o dos veces a la semana	Nunca	Todos los dias	Nunca	Nunca	Una vez al mes	Una vez al mes	Todos los dias	Todos los dias	Nunca	Una o dos veces a la semana	Todos los dias	Todos los dias	Siete días	Siete días	Siete días	3	1	No	Mucho más de lo normal	0 min	21-30 min	Más de 1 h	21-30 min	Sí	1-2 h	Más de 7 h	0 min	1-2 h	2-3 h	1-2 h	1-2 h	3-4 h	3-4 h	Casi nunca	De vez en cuando	Nunca	Muy a menudo	Muy a menudo	Casi nunca	Muy a menudo	A menudo	Casi nunca	Nunca	Una a cuatro veces por semana
40	Mujer	25.9645	Casado(a)	Todos los dias	Nunca	Una o dos veces a la semana	Todos los dias	Tres a cuatro veces por semama	Todos los dias	Dos a tres veces al mes	Dos a tres veces al mes	Tres a cuatro veces por semama	Todos los dias	Una o dos veces a la semana	Dos a tres veces al mes	Una o dos veces a la semana	Todos los dias	Siete días	Siete días	Siete días	3	2	Si	Mucho más de lo normal	31-60 min	21-30 min	21-30 min	21-30 min	Sí	1-2 h	Más de 7 h	0 min	30-60 min	1-2 h	1-2 h	0 min	16-30 min	16-30 min	A menudo	A menudo	De vez en cuando	A menudo	Muy a menudo	Casi nunca	A menudo	A menudo	Casi nunca	Todos los dias	Nunca
36	Mujer	25.3906	Soltero(a)	Todos los dias	Nunca	Una vez al mes	Nunca	Dos a tres veces al mes	Una vez al mes	Una vez al mes	Nunca	Todos los dias	Una vez al mes	Todos los dias	Una vez al mes	Dos a tres veces al mes	Todos los dias	Siete días	Siete días	Siete días	3	2	Si	Mucho más de lo normal	0 min	11-20 min	11-20 min	11-20 min	Sí	1-2 h	Más de 7 h	0 min	1-15 min	30-60 min	0 min	0 min	16-30 min	0 min	Casi nunca	De vez en cuando	A menudo	De vez en cuando	De vez en cuando	A menudo	A menudo	De vez en cuando	De vez en cuando	Todos los dias	Nunca
63	Mujer	21.9076	Casado(a)	Todos los dias	Nunca	Dos a tres veces al mes	Nunca	Nunca	Nunca	Tres a cuatro veces por semana	Tres a cuatro veces por semama	Todos los dias	Dos a tres veces al mes	Dos a tres veces al mes	Una vez al mes	Nunca	Todos los dias	Siete días	Siete días	Dos días	2	1	Si	Mucho más de lo normal	0 min	11-20 min	Más de 1 h	1-10 min	Sí	1-2 h	Más de 7 h	0 min	3-4 h	1-2 h	0 min	3-4 h	3-4 h	0 min	De vez en cuando	Casi nunca	De vez en cuando	A menudo	Muy a menudo	Casi nunca	Muy a menudo	Muy a menudo	Casi nunca	Todos los dias	Nunca
27	Mujer	21.0828	Soltero(a)	Una o dos veces a la semana	Nunca	Una o dos veces a la semana	Tres a cuatro veces por semama	Tres a cuatro veces por semama	Tres a cuatro veces por semama	Una o dos veces a la semana	Una vez al mes	Una o dos veces a la semana	Una o dos veces a la semana	Una o dos veces a la semana	Una o dos veces a la semana	Una o dos veces a la semana	Tres a cuatro veces por semama	Siete días	Siete días	Siete días	3	2	No	Mucho más de lo normal	31-60 min	31-60 min	31-60 min	21-30 min	Sí	1-2 h	Más de 7 h	0 min	30-60 min	30-60 min	0 min	0 min	16-30 min	0 min	A menudo	A menudo	A menudo	De vez en cuando	De vez en cuando	A menudo	De vez en cuando	De vez en cuando	De vez en cuando	Una a cuatro veces por semana	Nunca
24	Mujer	30.8185	Soltero(a)	Una o dos veces a la semana	Nunca	Una vez al mes	Nunca	Nunca	Nunca	Dos a tres veces al mes	Nunca	Todos los dias	Nunca	Una o dos veces a la semana	Una o dos veces a la semana	Nunca	Todos los dias	Cinco días	Siete días	Siete días	3	1	No	Un poco más de lo normal	16-30 min	31-60 min	31-60 min	31-60 min	Sí	1-2 h	Más de 7 h	0 min	0 min	1-2 h	0 min	0 min	30-60 min	0 min	Muy a menudo	De vez en cuando	Muy a menudo	Muy a menudo	A menudo	A menudo	A menudo	A menudo	Casi nunca	Una a cuatro veces por semana	Nunca
42	Hombre	27.852	Separado(a)	Tres a cuatro veces por semama	Nunca	Dos a tres veces al mes	Nunca	Dos a tres veces al mes	Nunca	Nunca	Nunca	Todos los dias	Todos los dias	Todos los dias	Una o dos veces a la semana	Todos los dias	Todos los dias	Siete días	Siete días	Siete días	3	1	Si	Mucho más de lo normal	0 min	11-20 min	11-20 min	11-20 min	Sí	1-2 h	Más de 7 h	0 min	16-30 min	30-60 min	30-60 min	0 min	0 min	3-4 h	De vez en cuando	Nunca	De vez en cuando	Muy a menudo	A menudo	Casi nunca	Muy a menudo	A menudo	Casi nunca	Una a cuatro veces por semana	Nunca
20	Mujer	20.7756	Soltero(a)	Todos los dias	Nunca	Nunca	Tres a cuatro veces por semama	Todos los dias	Todos los dias	Una vez al mes	Una vez al mes	Tres a cuatro veces por semama	Todos los dias	Todos los dias	Todos los dias	Tres a cuatro veces por semama	Todos los dias	Siete días	Siete días	Siete días	3	2	No	Más o menos igual	Más de 1 hora	21-30 min	31-60 min	21-30 min	Sí	1-2 h	Más de 7 h	0 min	1-2 h	3-4 h	0 min	0 min	30-60 min	0 min	De vez en cuando	Casi nunca	Muy a menudo	Casi nunca	De vez en cuando	De vez en cuando	A menudo	A menudo	Casi nunca	Todos los dias	Nunca
23	Mujer	20.3954	Soltero(a)	Una o dos veces a la semana	Todos los dias	Una vez al mes	Una o dos veces a la semana	Dos a tres veces al mes	Dos a tres veces al mes	Dos a tres veces al mes	Todos los dias	Tres a cuatro veces por semama	Todos los dias	Todos los dias	Dos a tres veces al mes	Todos los dias	Todos los dias	Siete días	Siete días	Siete días	3	1	Si	Mucho más de lo normal	0 min	1-10 min	21-30 min	21-30 min	Sí	1-2 h	Más de 7 h	0 min	16-30 min	30-60 min	0 min	30-60 min	3-4 h	30-60 min	A menudo	A menudo	Muy a menudo	A menudo	De vez en cuando	De vez en cuando	A menudo	A menudo	De vez en cuando	Una a cuatro veces por semana	Todos los dias
18	Hombre	27.7778	Soltero(a)	Tres a cuatro veces por semama	Nunca	Nunca	Una o dos veces a la semana	Nunca	Nunca	Una vez al mes	Una vez al mes	Tres a cuatro veces por semama	Una o dos veces a la semana	Una o dos veces a la semana	Una o dos veces a la semana	Todos los dias	Tres a cuatro veces por semama	Siete días	Siete días	Siete días	3	1	No	Un poco más de lo normal	Más de 1 hora	11-20 min	11-20 min	1-10 min	Sí	1-2 h	Más de 7 h	1-2 h	1-2 h	1-15 min	0 min	0 min	3-4 h	0 min	Casi nunca	Casi nunca	Casi nunca	Muy a menudo	A menudo	De vez en cuando	A menudo	Muy a menudo	Nunca	Una a cuatro veces por semana	Nunca
22	Hombre	31.7739	Soltero(a)	Nunca	Nunca	Una o dos veces a la semana	Una vez al mes	Nunca	Una o dos veces a la semana	Nunca	Nunca	Todos los dias	Una o dos veces a la semana	Dos a tres veces al mes	Una vez al mes	Nunca	Todos los dias	Siete días	Siete días	Siete días	1	0	No	Mucho más de lo normal	0 min	21-30 min	21-30 min	21-30 min	Sí	1-2 h	Más de 7 h	1-2 h	30-60 min	30-60 min	16-30 min	0 min	2-3 h	0 min	De vez en cuando	Muy a menudo	Muy a menudo	Muy a menudo	A menudo	A menudo	A menudo	De vez en cuando	De vez en cuando	Nunca	Nunca
50	Mujer	23.0469	Casado(a)	Una o dos veces a la semana	Nunca	Nunca	Dos a tres veces al mes	Una vez al mes	Nunca	Una vez al mes	Una vez al mes	Tres a cuatro veces por semama	Una o dos veces a la semana	Tres a cuatro veces por semama	Una vez al mes	Todos los dias	Tres a cuatro veces por semama	Tres dias	Tres dias	Tres dias	3	1	Si	Mucho más de lo normal	0 min	1-10 min	11-20 min	1-10 min	Sí	1-2 h	Más de 7 h	16-30 min	16-30 min	1-2 h	0 min	0 min	16-30 min	30-60 min	De vez en cuando	De vez en cuando	De vez en cuando	A menudo	A menudo	De vez en cuando	A menudo	A menudo	De vez en cuando	Una a cuatro veces por semana	Nunca
29	Mujer	29.2969	Soltero(a)	Tres a cuatro veces por semama	Una o dos veces a la semana	Tres a cuatro veces por semama	Tres a cuatro veces por semama	Una o dos veces a la semana	Tres a cuatro veces por semama	Dos a tres veces al mes	Una vez al mes	Tres a cuatro veces por semama	Dos a tres veces al mes	Dos a tres veces al mes	Una o dos veces a la semana	Una o dos veces a la semana	Todos los dias	Cinco días	Siete días	Siete días	2	3	Si	Mucho más de lo normal	1-15 min	1-10 min	1-10 min	1-10 min	No	1-2 h	Más de 7 h	30-60 min	0 min	30-60 min	0 min	0 min	1-2 h	0 min	Casi nunca	Casi nunca	A menudo	A menudo	A menudo	De vez en cuando	A menudo	A menudo	Casi nunca	Una a cuatro veces por semana	Una a cuatro veces por semana
36	Mujer	26.9531	Soltero(a)	Una o dos veces a la semana	Nunca	Una vez al mes	Dos a tres veces al mes	Dos a tres veces al mes	Una o dos veces a la semana	Nunca	Nunca	Todos los dias	Todos los dias	Todos los dias	Una o dos veces a la semana	Una o dos veces a la semana	Todos los dias	Siete días	Siete días	Siete días	3	1	Si	Mucho más de lo normal	Más de 1 hora	11-20 min	31-60 min	11-20 min	Sí	1-2 h	Más de 7 h	30-60 min	30-60 min	0 min	0 min	0 min	30-60 min	30-60 min	A menudo	A menudo	A menudo	De vez en cuando	De vez en cuando	De vez en cuando	De vez en cuando	De vez en cuando	A menudo	Una a cuatro veces por semana	Nunca
19	Mujer	28.441	Soltero(a)	Una o dos veces a la semana	Dos a tres veces al mes	Dos a tres veces al mes	Dos a tres veces al mes	Dos a tres veces al mes	Una vez al mes	Una vez al mes	Una vez al mes	Todos los dias	Tres a cuatro veces por semama	Una o dos veces a la semana	Dos a tres veces al mes	Una o dos veces a la semana	Todos los dias	Siete días	Cinco días	Cuatro días	3	1	Si	Mucho menos de lo normal	0 min	11-20 min	11-20 min	1-10 min	Sí	1-2 h	Más de 7 h	Más de 7 h	1-15 min	2-3 h	0 min	30-60 min	2-3 h	3-4 h	Casi nunca	Casi nunca	Casi nunca	A menudo	A menudo	De vez en cuando	A menudo	Muy a menudo	Casi nunca	Una a cuatro veces por semana	Una a tres veces al mes
19	Mujer	27.0552	Soltero(a)	Tres a cuatro veces por semama	Nunca	Una o dos veces a la semana	Una o dos veces a la semana	Tres a cuatro veces por semama	Todos los dias	Nunca	Una vez al mes	Todos los dias	Una o dos veces a la semana	Dos a tres veces al mes	Dos a tres veces al mes	Una o dos veces a la semana	Todos los dias	Siete días	Siete días	Tres dias	3	2	Si	Un poco más de lo normal	0 min	11-20 min	31-60 min	11-20 min	No	16-30 min	5-6 h	0 min	0 min	2-3 h	3-4 h	0 min	30-60 min	0 min	De vez en cuando	A menudo	A menudo	A menudo	De vez en cuando	De vez en cuando	A menudo	De vez en cuando	Casi nunca	Una a cuatro veces por semana	Nunca
25	Mujer	22.4323	Soltero(a)	Nunca	Nunca	Nunca	Nunca	Nunca	Nunca	Nunca	Nunca	Todos los dias	Nunca	Nunca	Nunca	Nunca	Todos los dias	Siete días	Siete días	Siete días	3	2	No	Mucho más de lo normal	16-30 min	31-60 min	31-60 min	31-60 min	Sí	16-30 min	5-6 h	0 min	30-60 min	0 min	0 min	0 min	1-2 h	3-4 h	Casi nunca	Casi nunca	Casi nunca	Muy a menudo	Muy a menudo	Nunca	Muy a menudo	Muy a menudo	Casi nunca	Nunca	Nunca
23	Hombre	34.4781	Soltero(a)	Todos los dias	Dos a tres veces al mes	Nunca	Dos a tres veces al mes	Dos a tres veces al mes	Nunca	Dos a tres veces al mes	Una vez al mes	Todos los dias	Dos a tres veces al mes	Dos a tres veces al mes	Tres a cuatro veces por semama	Todos los dias	Todos los dias	Cinco días	Siete días	Siete días	3	1	Si	Mucho más de lo normal	16-30 min	11-20 min	31-60 min	31-60 min	Sí	16-30 min	5-6 h	0 min	0 min	0 min	0 min	0 min	16-30 min	0 min	Casi nunca	Casi nunca	Casi nunca	A menudo	A menudo	Casi nunca	A menudo	A menudo	Casi nunca	Todos los dias	Una a tres veces al mes
49	Hombre	26.4236	Casado(a)	Tres a cuatro veces por semama	Nunca	Nunca	Nunca	Nunca	Nunca	Una o dos veces a la semana	Nunca	Todos los dias	Una o dos veces a la semana	Una o dos veces a la semana	Una o dos veces a la semana	Una o dos veces a la semana	Todos los dias	Siete días	Siete días	Siete días	3	1	No	Mucho más de lo normal	16-30 min	1-10 min	21-30 min	11-20 min	Sí	16-30 min	5-6 h	0 min	16-30 min	2-3 h	30-60 min	1-15 min	1-15 min	0 min	Casi nunca	Nunca	Casi nunca	Muy a menudo	A menudo	Nunca	Muy a menudo	Muy a menudo	Nunca	Una a cuatro veces por semana	Nunca
27	Hombre	26.7299	Soltero(a)	Tres a cuatro veces por semama	Nunca	Nunca	Nunca	Nunca	Nunca	Tres a cuatro veces por semana	Nunca	Tres a cuatro veces por semama	Una o dos veces a la semana	Dos a tres veces al mes	Una vez al mes	Una vez al mes	Dos a tres veces al mes	Seis días	Siete días	Siete días	3	1	No	Mucho más de lo normal	Más de 1 hora	1-10 min	1-10 min	1-10 min	Sí	16-30 min	5-6 h	5-6 h	0 min	16-30 min	0 min	0 min	16-30 min	0 min	De vez en cuando	De vez en cuando	A menudo	A menudo	A menudo	Casi nunca	A menudo	A menudo	Casi nunca	Una a cuatro veces por semana	Nunca
26	Hombre	35.5114	Soltero(a)	Todos los dias	Nunca	Todos los dias	Una o dos veces a la semana	Nunca	Una vez al mes	Tres a cuatro veces por semana	Dos a tres veces al mes	Tres a cuatro veces por semama	Una o dos veces a la semana	Todos los dias	Tres a cuatro veces por semama	Dos a tres veces al mes	Todos los dias	Cuatro días	Cuatro días	Cuatro días	3	1	No	Un poco más de lo normal	31-60 min	11-20 min	11-20 min	11-20 min	Sí	16-30 min	6-7 h	0 min	0 min	0 min	0 min	16-30 min	30-60 min	30-60 min	Casi nunca	Casi nunca	Casi nunca	A menudo	Muy a menudo	Nunca	Muy a menudo	A menudo	Nunca	Todos los dias	Nunca
28	Mujer	30.0433	Casado(a)	Una o dos veces a la semana	Una vez al mes	Una o dos veces a la semana	Tres a cuatro veces por semama	Todos los dias	Tres a cuatro veces por semama	Una o dos veces a la semana	Tres a cuatro veces por semama	Una o dos veces a la semana	Tres a cuatro veces por semama	Todos los dias	Tres a cuatro veces por semama	Dos a tres veces al mes	Todos los dias	Siete días	Siete días	Siete días	2	1	Si	Un poco más de lo normal	0 min	11-20 min	31-60 min	1-10 min	No	16-30 min	6-7 h	0 min	0 min	30-60 min	3-4 h	0 min	0 min	0 min	Muy a menudo	Muy a menudo	Muy a menudo	A menudo	De vez en cuando	A menudo	De vez en cuando	De vez en cuando	De vez en cuando	Una a cuatro veces por semana	Una a tres veces al mes
31	Mujer	24.0238	Soltero(a)	Dos a tres veces al mes	Dos a tres veces al mes	Una vez al mes	Todos los dias	Dos a tres veces al mes	Una vez al mes	Nunca	Nunca	Todos los dias	Una o dos veces a la semana	Una o dos veces a la semana	Dos a tres veces al mes	Dos a tres veces al mes	Todos los dias	Cuatro días	Cuatro días	Cuatro días	3	1	Si	Un poco más de lo normal	31-60 min	11-20 min	21-30 min	11-20 min	Sí	16-30 min	6-7 h	0 min	16-30 min	16-30 min	0 min	0 min	3-4 h	2-3 h	Casi nunca	Casi nunca	De vez en cuando	Muy a menudo	Muy a menudo	Casi nunca	De vez en cuando	Muy a menudo	Casi nunca	Una a tres veces al mes	Una a tres veces al mes
30	Mujer	30.7574	Soltero(a)	Nunca	Todos los dias	Nunca	Todos los dias	Todos los dias	Todos los dias	Dos a tres veces al mes	Nunca	Todos los dias	Una vez al mes	Una o dos veces a la semana	Dos a tres veces al mes	Una o dos veces a la semana	Nunca	Siete días	Siete días	Dos días	2	0	Si	Mucho más de lo normal	0 min	31-60 min	31-60 min	0 min	No	16-30 min	6-7 h	0 min	1-15 min	2-3 h	0 min	0 min	1-15 min	0 min	A menudo	A menudo	A menudo	A menudo	Casi nunca	De vez en cuando	De vez en cuando	De vez en cuando	Casi nunca	Nunca	Todos los dias
23	Mujer	28.0404	Soltero(a)	Todos los dias	Tres a cuatro veces por semama	Una o dos veces a la semana	Todos los dias	Todos los dias	Todos los dias	Nunca	Una vez al mes	Todos los dias	Tres a cuatro veces por semama	Todos los dias	Una o dos veces a la semana	Nunca	Una o dos veces a la semana	Tres dias	Siete días	Siete días	3	3	Si	Mucho más de lo normal	1-15 min	11-20 min	21-30 min	21-30 min	Sí	16-30 min	6-7 h	0 min	0 min	30-60 min	2-3 h	0 min	1-15 min	0 min	De vez en cuando	A menudo	A menudo	Casi nunca	De vez en cuando	De vez en cuando	De vez en cuando	De vez en cuando	De vez en cuando	Todos los dias	Una a cuatro veces por semana
56	Mujer	24.841	Soltero(a)	Nunca	Nunca	Nunca	Nunca	Nunca	Nunca	Dos a tres veces al mes	Tres a cuatro veces por semama	Todos los dias	Una o dos veces a la semana	Una o dos veces a la semana	Una vez al mes	Tres a cuatro veces por semama	Todos los dias	Siete días	Siete días	Siete días	3	1	No	Un poco más de lo normal	0 min	11-20 min	31-60 min	31-60 min	Sí	16-30 min	6-7 h	0 min	0 min	0 min	0 min	0 min	0 min	0 min	Casi nunca	Nunca	De vez en cuando	Muy a menudo	Muy a menudo	Nunca	Muy a menudo	Muy a menudo	Nunca	Nunca	Nunca
18	Mujer	34.4842	Soltero(a)	Todos los dias	Nunca	Nunca	Dos a tres veces al mes	Todos los dias	Todos los dias	Una o dos veces a la semana	Nunca	Todos los dias	Todos los dias	Todos los dias	Tres a cuatro veces por semama	Tres a cuatro veces por semama	Todos los dias	Siete días	Siete días	Siete días	3	2	No	Mucho más de lo normal	1-15 min	11-20 min	11-20 min	21-30 min	Sí	16-30 min	6-7 h	0 min	2-3 h	1-2 h	3-4 h	3-4 h	3-4 h	0 min	A menudo	De vez en cuando	Muy a menudo	De vez en cuando	A menudo	Casi nunca	De vez en cuando	A menudo	A menudo	Todos los dias	Nunca
21	Mujer	28.6726	Soltero(a)	Tres a cuatro veces por semama	Nunca	Una vez al mes	Una vez al mes	Tres a cuatro veces por semama	Tres a cuatro veces por semama	Tres a cuatro veces por semana	Una vez al mes	Nunca	Una o dos veces a la semana	Tres a cuatro veces por semama	Tres a cuatro veces por semama	Dos a tres veces al mes	Una o dos veces a la semana	Cinco días	Siete días	Siete días	3	0	No	Mucho más de lo normal	Más de 1 hora	11-20 min	31-60 min	21-30 min	Sí	16-30 min	Más de 7 h	0 min	16-30 min	30-60 min	1-15 min	0 min	0 min	2-3 h	A menudo	A menudo	A menudo	A menudo	De vez en cuando	De vez en cuando	Casi nunca	Casi nunca	De vez en cuando	Una a cuatro veces por semana	Nunca
28	Mujer	26.7698	Soltero(a)	Todos los dias	Nunca	Una o dos veces a la semana	Una o dos veces a la semana	Dos a tres veces al mes	Dos a tres veces al mes	Una vez al mes	Nunca	Todos los dias	Dos a tres veces al mes	Tres a cuatro veces por semama	Una o dos veces a la semana	Una o dos veces a la semana	Tres a cuatro veces por semama	Siete días	Siete días	Siete días	4	1	No	Mucho más de lo normal	Más de 1 hora	0 min	Más de 1 h	0 min	Sí	16-30 min	Más de 7 h	0 min	0 min	30-60 min	0 min	0 min	3-4 h	0 min	De vez en cuando	Casi nunca	De vez en cuando	De vez en cuando	De vez en cuando	De vez en cuando	De vez en cuando	Casi nunca	A menudo	Todos los dias	Nunca
29	Mujer	25.8065	Soltero(a)	Todos los dias	Nunca	Una o dos veces a la semana	Nunca	Nunca	Una vez al mes	Una o dos veces a la semana	Dos a tres veces al mes	Todos los dias	Tres a cuatro veces por semama	Una o dos veces a la semana	Dos a tres veces al mes	Tres a cuatro veces por semama	Todos los dias	Siete días	Siete días	Siete días	3	2	No	Un poco más de lo normal	0 min	1-10 min	31-60 min	31-60 min	Sí	16-30 min	Más de 7 h	0 min	1-15 min	0 min	0 min	0 min	3-4 h	3-4 h	De vez en cuando	Casi nunca	De vez en cuando	A menudo	A menudo	Casi nunca	A menudo	A menudo	Casi nunca	Todos los dias	Nunca
25	Mujer	23.5304	Soltero(a)	Todos los dias	Nunca	Dos a tres veces al mes	Dos a tres veces al mes	Dos a tres veces al mes	Dos a tres veces al mes	Una o dos veces a la semana	Una vez al mes	Todos los dias	Todos los dias	Dos a tres veces al mes	Dos a tres veces al mes	Dos a tres veces al mes	Todos los dias	Siete días	Siete días	Cinco días	3	2	No	Mucho más de lo normal	1-15 min	11-20 min	31-60 min	21-30 min	Sí	16-30 min	Más de 7 h	16-30 min	1-2 h	0 min	0 min	0 min	1-2 h	3-4 h	De vez en cuando	A menudo	A menudo	De vez en cuando	De vez en cuando	De vez en cuando	De vez en cuando	De vez en cuando	De vez en cuando	Todos los dias	Nunca
30	Mujer	24.5578	Soltero(a)	Una o dos veces a la semana	Nunca	Nunca	Una vez al mes	Nunca	Nunca	Nunca	Nunca	Todos los dias	Tres a cuatro veces por semama	Una vez al mes	Una vez al mes	Todos los dias	Todos los dias	Siete días	Siete días	Siete días	5	2	Si	Más o menos igual	0 min	0 min	31-60 min	31-60 min	Sí	2-3 h	5-6 h	0 min	1-2 h	16-30 min	0 min	30-60 min	1-2 h	1-2 h	De vez en cuando	De vez en cuando	De vez en cuando	A menudo	A menudo	De vez en cuando	A menudo	Muy a menudo	De vez en cuando	Una a cuatro veces por semana	Nunca
38	Mujer	51.4233	Separado(a)	Todos los dias	Nunca	Dos a tres veces al mes	Tres a cuatro veces por semama	Una o dos veces a la semana	Una o dos veces a la semana	Dos a tres veces al mes	Nunca	Todos los dias	Tres a cuatro veces por semama	Tres a cuatro veces por semama	Una o dos veces a la semana	Dos a tres veces al mes	Todos los dias	Siete días	Siete días	Cinco días	2	1	Si	Mucho más de lo normal	0 min	11-20 min	11-20 min	1-10 min	Sí	2-3 h	5-6 h	0 min	0 min	0 min	0 min	0 min	0 min	3-4 h	De vez en cuando	Casi nunca	De vez en cuando	Muy a menudo	A menudo	Casi nunca	A menudo	A menudo	Casi nunca	Todos los dias	Nunca
47	Mujer	26.9896	Casado(a)	Todos los dias	Una o dos veces a la semana	Una o dos veces a la semana	Tres a cuatro veces por semama	Todos los dias	Todos los dias	Una o dos veces a la semana	Nunca	Nunca	Tres a cuatro veces por semama	Nunca	Nunca	Nunca	Todos los dias	Siete días	Siete días	Siete días	3	2	Si	Mucho más de lo normal	31-60 min	0 min	21-30 min	11-20 min	Sí	2-3 h	5-6 h	0 min	0 min	0 min	0 min	30-60 min	0 min	0 min	De vez en cuando	Casi nunca	De vez en cuando	A menudo	A menudo	De vez en cuando	A menudo	A menudo	Casi nunca	Todos los dias	Una a cuatro veces por semana
36	Mujer	28.0899	Soltero(a)	Una o dos veces a la semana	Una o dos veces a la semana	Dos a tres veces al mes	Dos a tres veces al mes	Dos a tres veces al mes	Dos a tres veces al mes	Dos a tres veces al mes	Nunca	Una o dos veces a la semana	Dos a tres veces al mes	Una o dos veces a la semana	Dos a tres veces al mes	Dos a tres veces al mes	Todos los dias	Tres dias	Siete días	Cinco días	2	1	No	Mucho más de lo normal	0 min	1-10 min	21-30 min	11-20 min	Sí	2-3 h	5-6 h	0 min	0 min	2-3 h	0 min	0 min	0 min	0 min	De vez en cuando	De vez en cuando	De vez en cuando	A menudo	A menudo	De vez en cuando	Muy a menudo	A menudo	Casi nunca	Una a cuatro veces por semana	Una a cuatro veces por semana
44	Mujer	22.9421	Separado(a)	Dos a tres veces al mes	Una o dos veces a la semana	Nunca	Nunca	Nunca	Nunca	Una vez al mes	Una vez al mes	Todos los dias	Una o dos veces a la semana	Una o dos veces a la semana	Una vez al mes	Dos a tres veces al mes	Todos los dias	Cinco días	Siete días	Tres dias	2	0	No	Mucho más de lo normal	31-60 min	11-20 min	21-30 min	0 min	Sí	2-3 h	5-6 h	0 min	1-15 min	1-15 min	0 min	0 min	1-15 min	3-4 h	De vez en cuando	Nunca	De vez en cuando	Muy a menudo	A menudo	Casi nunca	Muy a menudo	Muy a menudo	Nunca	Una a tres veces al mes	Una a cuatro veces por semana
30	Mujer	33.9624	Soltero(a)	Tres a cuatro veces por semama	Nunca	Nunca	Tres a cuatro veces por semama	Tres a cuatro veces por semama	Dos a tres veces al mes	Tres a cuatro veces por semana	Una vez al mes	Todos los dias	Todos los dias	Una o dos veces a la semana	Una o dos veces a la semana	Una o dos veces a la semana	Todos los dias	Siete días	Siete días	Siete días	3	1	No	Mucho menos de lo normal	0 min	1-10 min	1-10 min	1-10 min	Sí	2-3 h	5-6 h	0 min	1-2 h	1-2 h	0 min	0 min	1-2 h	0 min	De vez en cuando	Muy a menudo	Muy a menudo	Nunca	De vez en cuando	De vez en cuando	De vez en cuando	De vez en cuando	De vez en cuando	Una a cuatro veces por semana	Nunca
26	Mujer	32.0461	Soltero(a)	Nunca	Dos a tres veces al mes	Nunca	Nunca	Nunca	Nunca	Nunca	Nunca	Todos los dias	Dos a tres veces al mes	Una vez al mes	Una vez al mes	Todos los dias	Todos los dias	Siete días	Siete días	Siete días	3	1	Si	Más o menos igual	1-15 min	31-60 min	31-60 min	11-20 min	Sí	2-3 h	5-6 h	0 min	30-60 min	1-2 h	0 min	0 min	30-60 min	0 min	De vez en cuando	De vez en cuando	De vez en cuando	A menudo	A menudo	De vez en cuando	A menudo	A menudo	Casi nunca	Nunca	Una a tres veces al mes
23	Mujer	32.8473	Soltero(a)	Todos los dias	Dos a tres veces al mes	Una vez al mes	Tres a cuatro veces por semama	Tres a cuatro veces por semama	Dos a tres veces al mes	Una vez al mes	Nunca	Todos los dias	Todos los dias	Una vez al mes	Una vez al mes	Dos a tres veces al mes	Todos los dias	Siete días	Siete días	Siete días	3	1	Si	Más o menos igual	16-30 min	11-20 min	31-60 min	31-60 min	Sí	2-3 h	5-6 h	0 min	0 min	1-15 min	0 min	1-2 h	1-15 min	0 min	A menudo	De vez en cuando	A menudo	De vez en cuando	A menudo	De vez en cuando	A menudo	A menudo	Casi nunca	Todos los dias	Una a tres veces al mes
62	Mujer	24.6711	Casado(a)	Una o dos veces a la semana	Nunca	Dos a tres veces al mes	Dos a tres veces al mes	Dos a tres veces al mes	Dos a tres veces al mes	Dos a tres veces al mes	Nunca	Todos los dias	Todos los dias	Dos a tres veces al mes	Dos a tres veces al mes	Todos los dias	Todos los dias	Siete días	Siete días	Siete días	3	1	Si	Un poco más de lo normal	0 min	21-30 min	31-60 min	11-20 min	No	2-3 h	5-6 h	0 min	30-60 min	2-3 h	2-3 h	16-30 min	16-30 min	3-4 h	A menudo	A menudo	De vez en cuando	Muy a menudo	Muy a menudo	De vez en cuando	A menudo	A menudo	De vez en cuando	Una a cuatro veces por semana	Nunca
45	Mujer	33.9844	Separado(a)	Una o dos veces a la semana	Nunca	Una o dos veces a la semana	Todos los dias	Todos los dias	Todos los dias	Nunca	Nunca	Tres a cuatro veces por semama	Todos los dias	Tres a cuatro veces por semama	Una vez al mes	Tres a cuatro veces por semama	Tres a cuatro veces por semama	Siete días	Siete días	Siete días	3	2	Si	Mucho más de lo normal	0 min	31-60 min	31-60 min	21-30 min	Sí	2-3 h	5-6 h	0 min	0 min	0 min	0 min	0 min	30-60 min	3-4 h	De vez en cuando	De vez en cuando	De vez en cuando	De vez en cuando	A menudo	De vez en cuando	De vez en cuando	De vez en cuando	De vez en cuando	Una a cuatro veces por semana	Nunca
39	Mujer	23.7387	Separado(a)	Una o dos veces a la semana	Tres a cuatro veces por semama	Una vez al mes	Una vez al mes	Una o dos veces a la semana	Dos a tres veces al mes	Una o dos veces a la semana	Nunca	Una o dos veces a la semana	Una vez al mes	Todos los dias	Dos a tres veces al mes	Tres a cuatro veces por semama	Todos los dias	Cuatro días	Siete días	Seis días	1	1	Si	Mucho menos de lo normal	1-15 min	1-10 min	1-10 min	1-10 min	No	2-3 h	5-6 h	0 min	0 min	16-30 min	1-15 min	0 min	0 min	0 min	De vez en cuando	Casi nunca	De vez en cuando	A menudo	A menudo	Casi nunca	A menudo	A menudo	De vez en cuando	Una a cuatro veces por semana	Una a cuatro veces por semana
35	Mujer	30.4772	Soltero(a)	Todos los dias	Nunca	Una o dos veces a la semana	Tres a cuatro veces por semama	Tres a cuatro veces por semama	Todos los dias	Dos a tres veces al mes	Nunca	Tres a cuatro veces por semama	Todos los dias	Todos los dias	Tres a cuatro veces por semama	Dos a tres veces al mes	Tres a cuatro veces por semama	Siete días	Siete días	Siete días	3	2	Si	Un poco más de lo normal	16-30 min	21-30 min	21-30 min	21-30 min	Sí	2-3 h	5-6 h	0 min	1-2 h	2-3 h	30-60 min	30-60 min	30-60 min	0 min	Muy a menudo	A menudo	Muy a menudo	Casi nunca	Casi nunca	De vez en cuando	De vez en cuando	Casi nunca	De vez en cuando	Todos los dias	Nunca
46	Hombre	29.321	Soltero(a)	Tres a cuatro veces por semama	Nunca	Dos a tres veces al mes	Nunca	Dos a tres veces al mes	Dos a tres veces al mes	Dos a tres veces al mes	Nunca	Todos los dias	Todos los dias	Tres a cuatro veces por semama	Una o dos veces a la semana	Todos los dias	Todos los dias	Siete días	Siete días	Siete días	3	2	Si	Un poco más de lo normal	0 min	31-60 min	31-60 min	31-60 min	Sí	2-3 h	5-6 h	1-2 h	1-2 h	3-4 h	1-2 h	1-2 h	1-2 h	16-30 min	De vez en cuando	Casi nunca	Casi nunca	Muy a menudo	Muy a menudo	Casi nunca	Muy a menudo	Muy a menudo	Nunca	Una a cuatro veces por semana	Nunca
31	Mujer	25.3155	Soltero(a)	Una o dos veces a la semana	Tres a cuatro veces por semama	Una vez al mes	Dos a tres veces al mes	Dos a tres veces al mes	Dos a tres veces al mes	Una vez al mes	Nunca	Todos los dias	Una o dos veces a la semana	Tres a cuatro veces por semama	Una o dos veces a la semana	Una vez al mes	Dos a tres veces al mes	Tres dias	Siete días	Siete días	3	1	Si	Mucho más de lo normal	0 min	11-20 min	21-30 min	21-30 min	No	2-3 h	5-6 h	16-30 min	30-60 min	1-15 min	0 min	3-4 h	1-2 h	1-2 h	Casi nunca	Nunca	De vez en cuando	Muy a menudo	A menudo	Casi nunca	Muy a menudo	A menudo	Casi nunca	Una a cuatro veces por semana	Una a cuatro veces por semana
27	Mujer	28.2284	Soltero(a)	Dos a tres veces al mes	Una o dos veces a la semana	Una vez al mes	Dos a tres veces al mes	Dos a tres veces al mes	Dos a tres veces al mes	Una o dos veces a la semana	Nunca	Todos los dias	Una vez al mes	Todos los dias	Tres a cuatro veces por semama	Dos a tres veces al mes	Tres a cuatro veces por semama	Cinco días	Siete días	Siete días	3	1	Si	Mucho más de lo normal	31-60 min	11-20 min	31-60 min	21-30 min	Sí	2-3 h	5-6 h	16-30 min	30-60 min	1-2 h	0 min	1-2 h	2-3 h	0 min	Casi nunca	Casi nunca	A menudo	A menudo	A menudo	Casi nunca	Muy a menudo	A menudo	Casi nunca	Una a tres veces al mes	Una a cuatro veces por semana
30	Mujer	26.9274	Soltero(a)	Una o dos veces a la semana	Una o dos veces a la semana	Una o dos veces a la semana	Nunca	Nunca	Dos a tres veces al mes	Dos a tres veces al mes	Nunca	Tres a cuatro veces por semama	Una o dos veces a la semana	Una o dos veces a la semana	Dos a tres veces al mes	Nunca	Todos los dias	Un dia	Cinco días	Un dia	2	1	No	Mucho más de lo normal	0 min	11-20 min	11-20 min	11-20 min	Sí	2-3 h	5-6 h	16-30 min	0 min	1-2 h	0 min	0 min	1-15 min	0 min	Nunca	Nunca	Casi nunca	Muy a menudo	Muy a menudo	Casi nunca	A menudo	A menudo	Nunca	Una a cuatro veces por semana	Una a cuatro veces por semana
28	Hombre	24.8163	Soltero(a)	Una o dos veces a la semana	Nunca	Dos a tres veces al mes	Nunca	Una o dos veces a la semana	Todos los dias	Una o dos veces a la semana	Dos a tres veces al mes	Todos los dias	Tres a cuatro veces por semama	Todos los dias	Tres a cuatro veces por semama	Dos a tres veces al mes	Todos los dias	Siete días	Siete días	Siete días	3	1	Si	Mucho más de lo normal	31-60 min	11-20 min	11-20 min	11-20 min	Sí	2-3 h	5-6 h	2-3 h	30-60 min	16-30 min	3-4 h	16-30 min	16-30 min	16-30 min	A menudo	Casi nunca	De vez en cuando	A menudo	Muy a menudo	Casi nunca	A menudo	Muy a menudo	A menudo	Una a cuatro veces por semana	Nunca
66	Mujer	23.8754	Viudo(a)	Nunca	Nunca	Nunca	Dos a tres veces al mes	Dos a tres veces al mes	Nunca	Nunca	Nunca	Todos los dias	Dos a tres veces al mes	Tres a cuatro veces por semama	Nunca	Nunca	Todos los dias	Cuatro días	Cuatro días	Cuatro días	3	0	Si	Mucho más de lo normal	0 min	1-10 min	11-20 min	11-20 min	Sí	2-3 h	6-7 h	0 min	30-60 min	1-15 min	0 min	0 min	30-60 min	3-4 h	Nunca	Nunca	Nunca	Muy a menudo	Muy a menudo	Nunca	Muy a menudo	Muy a menudo	Nunca	Nunca	Nunca
26	Mujer	24.677	Soltero(a)	Tres a cuatro veces por semama	Una o dos veces a la semana	Nunca	Una o dos veces a la semana	Nunca	Todos los dias	Dos a tres veces al mes	Una vez al mes	Todos los dias	Todos los dias	Una o dos veces a la semana	Una vez al mes	Una o dos veces a la semana	Todos los dias	Cuatro días	Siete días	Cinco días	3	1	Si	Un poco más de lo normal	0 min	21-30 min	21-30 min	1-10 min	Sí	2-3 h	6-7 h	0 min	0 min	16-30 min	0 min	0 min	1-15 min	2-3 h	Casi nunca	Nunca	Casi nunca	Muy a menudo	De vez en cuando	Casi nunca	Muy a menudo	A menudo	Nunca	Una a cuatro veces por semana	Una a cuatro veces por semana
24	Mujer	24.6097	Soltero(a)	Una o dos veces a la semana	Una vez al mes	Una vez al mes	Nunca	Dos a tres veces al mes	Dos a tres veces al mes	Una o dos veces a la semana	Nunca	Todos los dias	Todos los dias	Una o dos veces a la semana	Una o dos veces a la semana	Una o dos veces a la semana	Una o dos veces a la semana	Siete días	Siete días	Cinco días	3	1	No	Mucho más de lo normal	Más de 1 hora	31-60 min	21-30 min	21-30 min	No	2-3 h	6-7 h	0 min	0 min	3-4 h	3-4 h	3-4 h	3-4 h	0 min	Muy a menudo	De vez en cuando	Muy a menudo	A menudo	A menudo	Casi nunca	A menudo	A menudo	Casi nunca	Una a cuatro veces por semana	Una a tres veces al mes
50	Mujer	26.5625	Casado(a)	Una o dos veces a la semana	Tres a cuatro veces por semama	Nunca	Tres a cuatro veces por semama	Una vez al mes	Una vez al mes	Una vez al mes	Dos a tres veces al mes	Una o dos veces a la semana	Una o dos veces a la semana	Tres a cuatro veces por semama	Dos a tres veces al mes	Una o dos veces a la semana	Dos a tres veces al mes	Dos días	Siete días	Dos días	2	1	Si	Mucho más de lo normal	0 min	21-30 min	31-60 min	21-30 min	Sí	2-3 h	6-7 h	0 min	16-30 min	0 min	0 min	0 min	0 min	1-2 h	Casi nunca	Casi nunca	Casi nunca	Muy a menudo	A menudo	De vez en cuando	Muy a menudo	A menudo	Casi nunca	Una a cuatro veces por semana	Una a cuatro veces por semana
30	Mujer	22.8928	Soltero(a)	Tres a cuatro veces por semama	Nunca	Una vez al mes	Una vez al mes	Dos a tres veces al mes	Nunca	Nunca	Nunca	Todos los dias	Dos a tres veces al mes	Dos a tres veces al mes	Dos a tres veces al mes	Dos a tres veces al mes	Tres a cuatro veces por semama	Siete días	Siete días	Siete días	3	2	Si	Mucho más de lo normal	16-30 min	11-20 min	31-60 min	21-30 min	Sí	2-3 h	6-7 h	0 min	0 min	16-30 min	0 min	0 min	0 min	30-60 min	De vez en cuando	Casi nunca	De vez en cuando	A menudo	A menudo	Casi nunca	A menudo	A menudo	Casi nunca	Una a cuatro veces por semana	Nunca
28	Mujer	24.0344	Soltero(a)	Dos a tres veces al mes	Nunca	Una vez al mes	Nunca	Nunca	Una o dos veces a la semana	Una vez al mes	Dos a tres veces al mes	Tres a cuatro veces por semama	Tres a cuatro veces por semama	Una vez al mes	Dos a tres veces al mes	Todos los dias	Una o dos veces a la semana	Siete días	Siete días	Cuatro días	4	1	Si	Mucho más de lo normal	16-30 min	1-10 min	21-30 min	11-20 min	Sí	2-3 h	6-7 h	0 min	0 min	0 min	30-60 min	1-15 min	1-15 min	1-15 min	A menudo	De vez en cuando	Muy a menudo	De vez en cuando	De vez en cuando	De vez en cuando	De vez en cuando	De vez en cuando	A menudo	Una a tres veces al mes	Nunca
24	Mujer	28.0404	Soltero(a)	Nunca	Una vez al mes	Una vez al mes	Nunca	Nunca	Nunca	Una vez al mes	Una vez al mes	Todos los dias	Una vez al mes	Una vez al mes	Una vez al mes	Una vez al mes	Todos los dias	Seis días	Siete días	Siete días	3	0	Si	Un poco más de lo normal	0 min	21-30 min	31-60 min	21-30 min	Sí	2-3 h	6-7 h	0 min	0 min	16-30 min	0 min	1-15 min	1-2 h	1-15 min	De vez en cuando	De vez en cuando	Muy a menudo	A menudo	Muy a menudo	A menudo	A menudo	A menudo	A menudo	Nunca	Una a tres veces al mes
34	Hombre	38.3032	Casado(a)	Una o dos veces a la semana	Tres a cuatro veces por semama	Una vez al mes	Tres a cuatro veces por semama	Todos los dias	Todos los dias	Tres a cuatro veces por semana	Nunca	Todos los dias	Todos los dias	Dos a tres veces al mes	Una o dos veces a la semana	Tres a cuatro veces por semama	Todos los dias	Seis días	Siete días	Dos días	2	1	No	Mucho más de lo normal	16-30 min	1-10 min	11-20 min	11-20 min	Sí	2-3 h	6-7 h	0 min	0 min	30-60 min	1-2 h	0 min	30-60 min	0 min	Muy a menudo	A menudo	Muy a menudo	A menudo	De vez en cuando	Muy a menudo	De vez en cuando	De vez en cuando	Muy a menudo	Una a cuatro veces por semana	Una a cuatro veces por semana
32	Mujer	29.7576	Soltero(a)	Tres a cuatro veces por semama	Nunca	Nunca	Tres a cuatro veces por semama	Una o dos veces a la semana	Tres a cuatro veces por semama	Una vez al mes	Nunca	Todos los dias	Todos los dias	Todos los dias	Tres a cuatro veces por semama	Una o dos veces a la semana	Tres a cuatro veces por semama	Siete días	Siete días	Siete días	3	1	Si	Mucho más de lo normal	31-60 min	21-30 min	21-30 min	21-30 min	Sí	2-3 h	6-7 h	0 min	0 min	1-2 h	0 min	0 min	2-3 h	0 min	A menudo	A menudo	A menudo	De vez en cuando	A menudo	De vez en cuando	A menudo	A menudo	De vez en cuando	Una a cuatro veces por semana	Nunca
23	Mujer	33.7325	Soltero(a)	Dos a tres veces al mes	Nunca	Una vez al mes	Dos a tres veces al mes	Tres a cuatro veces por semama	Tres a cuatro veces por semama	Una o dos veces a la semana	Nunca	Todos los dias	Todos los dias	Dos a tres veces al mes	Dos a tres veces al mes	Dos a tres veces al mes	Todos los dias	Cuatro días	Cuatro días	Cuatro días	3	1	No	Mucho más de lo normal	31-60 min	1-10 min	21-30 min	11-20 min	Sí	2-3 h	6-7 h	1-2 h	3-4 h	1-2 h	30-60 min	1-2 h	2-3 h	3-4 h	De vez en cuando	Casi nunca	Muy a menudo	A menudo	A menudo	Casi nunca	A menudo	A menudo	De vez en cuando	Una a tres veces al mes	Nunca
40	Hombre	26.7698	Casado(a)	Todos los dias	Nunca	Dos a tres veces al mes	Nunca	Nunca	Nunca	Tres a cuatro veces por semana	Una vez al mes	Una o dos veces a la semana	Una o dos veces a la semana	Una o dos veces a la semana	Una o dos veces a la semana	Una vez al mes	Todos los dias	Siete días	Siete días	Siete días	3	2	No	Un poco más de lo normal	1-15 min	11-20 min	21-30 min	11-20 min	Sí	2-3 h	6-7 h	3-4 h	1-2 h	1-2 h	1-2 h	30-60 min	30-60 min	1-2 h	A menudo	De vez en cuando	De vez en cuando	De vez en cuando	A menudo	Casi nunca	A menudo	A menudo	Casi nunca	Todos los dias	Nunca
32	Mujer	34.7209	Soltero(a)	Todos los dias	Una o dos veces a la semana	Todos los dias	Todos los dias	Todos los dias	Tres a cuatro veces por semama	Una vez al mes	Una vez al mes	Todos los dias	Una o dos veces a la semana	Todos los dias	Todos los dias	Una o dos veces a la semana	Todos los dias	Siete días	Siete días	Siete días	3	0	No	Mucho más de lo normal	0 min	Más de 1 h	Más de 1 h	Más de 1 h	Sí	2-3 h	Más de 7 h	0 min	2-3 h	2-3 h	0 min	0 min	1-2 h	0 min	De vez en cuando	De vez en cuando	A menudo	De vez en cuando	De vez en cuando	A menudo	A menudo	De vez en cuando	De vez en cuando	Todos los dias	Una a cuatro veces por semana
31	Mujer	23.8751	Soltero(a)	Todos los dias	Nunca	Una vez al mes	Dos a tres veces al mes	Nunca	Nunca	Una vez al mes	Nunca	Todos los dias	Dos a tres veces al mes	Nunca	Una vez al mes	Todos los dias	Todos los dias	Siete días	Siete días	Seis días	3	2	No	Mucho más de lo normal	0 min	11-20 min	21-30 min	21-30 min	Sí	2-3 h	Más de 7 h	0 min	0 min	16-30 min	0 min	0 min	3-4 h	3-4 h	Muy a menudo	De vez en cuando	Muy a menudo	Casi nunca	De vez en cuando	A menudo	A menudo	Casi nunca	De vez en cuando	Todos los dias	Nunca
24	Mujer	33.8741	Soltero(a)	Tres a cuatro veces por semama	Una vez al mes	Nunca	Nunca	Nunca	Una vez al mes	Tres a cuatro veces por semana	Nunca	Todos los dias	Tres a cuatro veces por semama	Una o dos veces a la semana	Una vez al mes	Tres a cuatro veces por semama	Todos los dias	Cinco días	Siete días	Siete días	3	1	No	Un poco menos de lo normal	31-60 min	11-20 min	21-30 min	21-30 min	Sí	2-3 h	Más de 7 h	0 min	0 min	1-15 min	0 min	0 min	30-60 min	0 min	A menudo	A menudo	A menudo	A menudo	De vez en cuando	De vez en cuando	A menudo	De vez en cuando	Casi nunca	Una a cuatro veces por semana	Una a tres veces al mes
26	Mujer	29.2969	Soltero(a)	Tres a cuatro veces por semama	Todos los dias	Dos a tres veces al mes	Una vez al mes	Una vez al mes	Una vez al mes	Dos a tres veces al mes	Una vez al mes	Todos los dias	Dos a tres veces al mes	Dos a tres veces al mes	Dos a tres veces al mes	Dos a tres veces al mes	Todos los dias	Seis días	Cuatro días	Cuatro días	3	2	Si	Un poco más de lo normal	16-30 min	21-30 min	31-60 min	21-30 min	Sí	2-3 h	Más de 7 h	0 min	30-60 min	2-3 h	16-30 min	30-60 min	30-60 min	0 min	A menudo	De vez en cuando	De vez en cuando	De vez en cuando	De vez en cuando	De vez en cuando	A menudo	De vez en cuando	De vez en cuando	Una a cuatro veces por semana	Todos los dias
27	Mujer	44.0771	Soltero(a)	Tres a cuatro veces por semama	Dos a tres veces al mes	Tres a cuatro veces por semama	Dos a tres veces al mes	Tres a cuatro veces por semama	Todos los dias	Tres a cuatro veces por semana	Nunca	Tres a cuatro veces por semama	Todos los dias	Dos a tres veces al mes	Tres a cuatro veces por semama	Una o dos veces a la semana	Todos los dias	Tres dias	Siete días	Cinco días	2	2	No	Un poco más de lo normal	0 min	21-30 min	21-30 min	21-30 min	Sí	2-3 h	Más de 7 h	0 min	0 min	1-2 h	0 min	0 min	1-15 min	0 min	Casi nunca	Muy a menudo	De vez en cuando	A menudo	Muy a menudo	Muy a menudo	Muy a menudo	A menudo	Casi nunca	Una a cuatro veces por semana	Una a tres veces al mes
22	Mujer	20.3244	Soltero(a)	Una o dos veces a la semana	Tres a cuatro veces por semama	Tres a cuatro veces por semama	Dos a tres veces al mes	Nunca	Una vez al mes	Nunca	Nunca	Tres a cuatro veces por semama	Nunca	Dos a tres veces al mes	Dos a tres veces al mes	Una o dos veces a la semana	Todos los dias	Cinco días	Siete días	Siete días	3	1	No	Mucho más de lo normal	Más de 1 hora	31-60 min	31-60 min	31-60 min	Sí	2-3 h	Más de 7 h	0 min	1-2 h	30-60 min	0 min	0 min	2-3 h	1-2 h	De vez en cuando	Muy a menudo	Muy a menudo	A menudo	De vez en cuando	Muy a menudo	De vez en cuando	Casi nunca	A menudo	Una a cuatro veces por semana	Una a cuatro veces por semana
23	Hombre	28.0843	Soltero(a)	Tres a cuatro veces por semama	Todos los dias	Nunca	Nunca	Una vez al mes	Todos los dias	Dos a tres veces al mes	Dos a tres veces al mes	Tres a cuatro veces por semama	Todos los dias	Una o dos veces a la semana	Una o dos veces a la semana	Dos a tres veces al mes	Todos los dias	Tres dias	Siete días	Cinco días	1	1	No	Mucho más de lo normal	16-30 min	31-60 min	Más de 1 h	Más de 1 h	Sí	2-3 h	Más de 7 h	0 min	0 min	3-4 h	0 min	0 min	2-3 h	0 min	A menudo	Muy a menudo	Muy a menudo	Muy a menudo	De vez en cuando	De vez en cuando	De vez en cuando	A menudo	A menudo	Una a cuatro veces por semana	Todos los dias
26	Mujer	19.9792	Soltero(a)	Tres a cuatro veces por semama	Una o dos veces a la semana	Nunca	Nunca	Nunca	Nunca	Dos a tres veces al mes	Una vez al mes	Todos los dias	Tres a cuatro veces por semama	Una o dos veces a la semana	Dos a tres veces al mes	Dos a tres veces al mes	Tres a cuatro veces por semama	Seis días	Siete días	Seis días	1	1	Si	Mucho más de lo normal	0 min	11-20 min	31-60 min	21-30 min	Sí	2-3 h	Más de 7 h	0 min	1-15 min	30-60 min	0 min	0 min	16-30 min	0 min	De vez en cuando	Casi nunca	De vez en cuando	A menudo	A menudo	Casi nunca	A menudo	A menudo	Casi nunca	Una a cuatro veces por semana	Una a cuatro veces por semana
21	Mujer	20.7031	Soltero(a)	Nunca	Nunca	Nunca	Una vez al mes	Una vez al mes	Nunca	Nunca	Nunca	Todos los dias	Una vez al mes	Una vez al mes	Una vez al mes	Una vez al mes	Nunca	Siete días	Siete días	Siete días	3	2	Si	Un poco más de lo normal	31-60 min	21-30 min	31-60 min	31-60 min	Sí	2-3 h	Más de 7 h	0 min	30-60 min	1-2 h	3-4 h	0 min	16-30 min	16-30 min	Casi nunca	Casi nunca	De vez en cuando	Muy a menudo	Muy a menudo	Casi nunca	Muy a menudo	Muy a menudo	De vez en cuando	Nunca	Nunca
31	Mujer	29.4118	Casado(a)	Nunca	Nunca	Nunca	Nunca	Dos a tres veces al mes	Todos los dias	Dos a tres veces al mes	Nunca	Todos los dias	Una o dos veces a la semana	Una o dos veces a la semana	Dos a tres veces al mes	Una o dos veces a la semana	Todos los dias	Siete días	Siete días	Siete días	2	1	No	Mucho más de lo normal	0 min	21-30 min	21-30 min	0 min	Sí	2-3 h	Más de 7 h	0 min	0 min	2-3 h	3-4 h	0 min	0 min	0 min	Casi nunca	De vez en cuando	Muy a menudo	A menudo	A menudo	Muy a menudo	A menudo	De vez en cuando	De vez en cuando	Nunca	Nunca
28	Mujer	24.7768	Soltero(a)	Todos los dias	Nunca	Dos a tres veces al mes	Dos a tres veces al mes	Nunca	Nunca	Una vez al mes	Nunca	Todos los dias	Nunca	Dos a tres veces al mes	Una vez al mes	Nunca	Todos los dias	Siete días	Siete días	Siete días	5	2	No	Un poco más de lo normal	0 min	11-20 min	31-60 min	11-20 min	Sí	2-3 h	Más de 7 h	0 min	0 min	1-15 min	0 min	0 min	1-2 h	0 min	De vez en cuando	Casi nunca	De vez en cuando	A menudo	A menudo	De vez en cuando	Muy a menudo	A menudo	De vez en cuando	Todos los dias	Nunca
19	Mujer	22.2656	Soltero(a)	Una o dos veces a la semana	Tres a cuatro veces por semama	Tres a cuatro veces por semama	Tres a cuatro veces por semama	Nunca	Nunca	Dos a tres veces al mes	Nunca	Todos los dias	Todos los dias	Nunca	Nunca	Una o dos veces a la semana	Todos los dias	Siete días	Siete días	Siete días	5	2	No	Un poco más de lo normal	31-60 min	11-20 min	11-20 min	11-20 min	Sí	2-3 h	Más de 7 h	0 min	3-4 h	2-3 h	2-3 h	0 min	2-3 h	1-2 h	Muy a menudo	Muy a menudo	Muy a menudo	Muy a menudo	A menudo	A menudo	A menudo	De vez en cuando	De vez en cuando	Una a cuatro veces por semana	Una a cuatro veces por semana
42	Mujer	27.1809	Casado(a)	Dos a tres veces al mes	Una o dos veces a la semana	Una vez al mes	Dos a tres veces al mes	Una o dos veces a la semana	Una o dos veces a la semana	Dos a tres veces al mes	Una vez al mes	Todos los dias	Tres a cuatro veces por semama	Una o dos veces a la semana	Dos a tres veces al mes	Tres a cuatro veces por semama	Todos los dias	Siete días	Siete días	Tres dias	1	2	No	Mucho más de lo normal	0 min	11-20 min	11-20 min	1-10 min	Sí	2-3 h	Más de 7 h	16-30 min	0 min	16-30 min	1-2 h	16-30 min	16-30 min	3-4 h	De vez en cuando	Nunca	Muy a menudo	A menudo	A menudo	De vez en cuando	Muy a menudo	A menudo	De vez en cuando	Una a tres veces al mes	Una a cuatro veces por semana
36	Hombre	44.9627	Casado(a)	Todos los dias	Todos los dias	Una o dos veces a la semana	Una o dos veces a la semana	Dos a tres veces al mes	Todos los dias	Dos a tres veces al mes	Nunca	Tres a cuatro veces por semama	Tres a cuatro veces por semama	Todos los dias	Tres a cuatro veces por semama	Una o dos veces a la semana	Todos los dias	Siete días	Siete días	Siete días	3	2	No	Mucho más de lo normal	31-60 min	1-10 min	21-30 min	21-30 min	Sí	2-3 h	Más de 7 h	30-60 min	0 min	0 min	0 min	30-60 min	0 min	0 min	Muy a menudo	De vez en cuando	A menudo	Muy a menudo	A menudo	De vez en cuando	A menudo	A menudo	Casi nunca	Todos los dias	Todos los dias
21	Mujer	33.2031	Soltero(a)	Tres a cuatro veces por semama	Tres a cuatro veces por semama	Una vez al mes	Tres a cuatro veces por semama	Tres a cuatro veces por semama	Tres a cuatro veces por semama	Dos a tres veces al mes	Una vez al mes	Todos los dias	Todos los dias	Todos los dias	Todos los dias	Tres a cuatro veces por semama	Una o dos veces a la semana	Cinco días	Siete días	Cinco días	4	2	Si	Mucho más de lo normal	0 min	1-10 min	11-20 min	1-10 min	Sí	2-3 h	Más de 7 h	30-60 min	30-60 min	1-2 h	0 min	0 min	30-60 min	0 min	A menudo	De vez en cuando	A menudo	De vez en cuando	De vez en cuando	De vez en cuando	De vez en cuando	De vez en cuando	Casi nunca	Una a cuatro veces por semana	Una a cuatro veces por semana
21	Hombre	23.3747	Soltero(a)	Una o dos veces a la semana	Una o dos veces a la semana	Una vez al mes	Nunca	Dos a tres veces al mes	Nunca	Nunca	Nunca	Todos los dias	Una o dos veces a la semana	Una o dos veces a la semana	Una o dos veces a la semana	Todos los dias	Tres a cuatro veces por semama	Siete días	Siete días	Siete días	4	1	No	Mucho más de lo normal	0 min	1-10 min	11-20 min	11-20 min	Sí	3-4 h	16-30 min	Más de 7 h	1-2 h	30-60 min	0 min	0 min	1-2 h	1-2 h	De vez en cuando	De vez en cuando	Muy a menudo	Casi nunca	De vez en cuando	A menudo	Casi nunca	Casi nunca	A menudo	Una a cuatro veces por semana	Una a cuatro veces por semana
31	Mujer	23.2446	Soltero(a)	Todos los dias	Una vez al mes	Nunca	Dos a tres veces al mes	Una vez al mes	Una vez al mes	Dos a tres veces al mes	Una vez al mes	Todos los dias	Dos a tres veces al mes	Dos a tres veces al mes	Una vez al mes	Dos a tres veces al mes	Todos los dias	Siete días	Siete días	Siete días	3	2	Si	Un poco más de lo normal	Más de 1 hora	31-60 min	Más de 1 h	21-30 min	Sí	3-4 h	5-6 h	0 min	1-2 h	1-2 h	1-2 h	1-2 h	1-2 h	0 min	De vez en cuando	De vez en cuando	De vez en cuando	De vez en cuando	A menudo	Casi nunca	Casi nunca	A menudo	De vez en cuando	Todos los dias	Una a tres veces al mes
19	Mujer	22.6667	Soltero(a)	Una vez al mes	Nunca	Una vez al mes	Nunca	Dos a tres veces al mes	Una vez al mes	Nunca	Nunca	Todos los dias	Una o dos veces a la semana	Dos a tres veces al mes	Dos a tres veces al mes	Dos a tres veces al mes	Nunca	Siete días	Siete días	Siete días	3	2	No	Mucho más de lo normal	16-30 min	11-20 min	21-30 min	11-20 min	No	3-4 h	5-6 h	0 min	30-60 min	0 min	0 min	0 min	3-4 h	0 min	De vez en cuando	Muy a menudo	Muy a menudo	Casi nunca	De vez en cuando	Muy a menudo	De vez en cuando	De vez en cuando	Muy a menudo	Una a tres veces al mes	Nunca
23	Mujer	23.6713	Soltero(a)	Todos los dias	Una vez al mes	Una o dos veces a la semana	Tres a cuatro veces por semama	Tres a cuatro veces por semama	Tres a cuatro veces por semama	Dos a tres veces al mes	Una vez al mes	Todos los dias	Todos los dias	Una o dos veces a la semana	Dos a tres veces al mes	Nunca	Todos los dias	Siete días	Siete días	Siete días	4	2	Si	Mucho más de lo normal	31-60 min	1-10 min	1-10 min	1-10 min	Sí	3-4 h	5-6 h	0 min	0 min	30-60 min	0 min	30-60 min	1-2 h	0 min	A menudo	De vez en cuando	Muy a menudo	De vez en cuando	A menudo	Casi nunca	A menudo	De vez en cuando	De vez en cuando	Todos los dias	Una a tres veces al mes
51	Mujer	28.6501	Casado(a)	Todos los dias	Nunca	Tres a cuatro veces por semama	Tres a cuatro veces por semama	Todos los dias	Tres a cuatro veces por semama	Nunca	Nunca	Todos los dias	Todos los dias	Nunca	Nunca	Nunca	Todos los dias	Siete días	Siete días	Un dia	3	2	No	Mucho más de lo normal	0 min	11-20 min	21-30 min	1-10 min	Sí	3-4 h	5-6 h	0 min	0 min	2-3 h	0 min	0 min	0 min	0 min	A menudo	A menudo	De vez en cuando	De vez en cuando	De vez en cuando	A menudo	De vez en cuando	De vez en cuando	De vez en cuando	Todos los dias	Nunca
40	Mujer	26.4855	Casado(a)	Una o dos veces a la semana	Nunca	Una o dos veces a la semana	Todos los dias	Nunca	Nunca	Una vez al mes	Nunca	Todos los dias	Una o dos veces a la semana	Dos a tres veces al mes	Una vez al mes	Todos los dias	Todos los dias	Siete días	Siete días	Tres dias	2	1	No	Mucho más de lo normal	0 min	1-10 min	11-20 min	1-10 min	Sí	3-4 h	5-6 h	0 min	16-30 min	30-60 min	3-4 h	16-30 min	0 min	0 min	Casi nunca	De vez en cuando	Casi nunca	Muy a menudo	A menudo	Casi nunca	A menudo	Muy a menudo	Casi nunca	Una a cuatro veces por semana	Nunca
25	Mujer	39.7283	Soltero(a)	Dos a tres veces al mes	Una vez al mes	Una o dos veces a la semana	Una o dos veces a la semana	Una o dos veces a la semana	Una o dos veces a la semana	Una vez al mes	Una vez al mes	Todos los dias	Dos a tres veces al mes	Dos a tres veces al mes	Todos los dias	Una o dos veces a la semana	Una o dos veces a la semana	Seis días	Cinco días	Siete días	3	1	No	Más o menos igual	31-60 min	1-10 min	21-30 min	11-20 min	Sí	3-4 h	5-6 h	6-7 h	1-15 min	2-3 h	1-2 h	1-2 h	2-3 h	3-4 h	De vez en cuando	De vez en cuando	Muy a menudo	De vez en cuando	De vez en cuando	De vez en cuando	De vez en cuando	De vez en cuando	A menudo	Una a tres veces al mes	Una a tres veces al mes
28	Hombre	23.3747	Soltero(a)	Una o dos veces a la semana	Todos los dias	Una vez al mes	Una vez al mes	Nunca	Nunca	Dos a tres veces al mes	Una vez al mes	Todos los dias	Dos a tres veces al mes	Tres a cuatro veces por semama	Tres a cuatro veces por semama	Una o dos veces a la semana	Todos los dias	Un dia	Siete días	Siete días	2	1	No	Mucho más de lo normal	16-30 min	0 min	31-60 min	21-30 min	Sí	3-4 h	6-7 h	0 min	30-60 min	30-60 min	0 min	0 min	30-60 min	0 min	Casi nunca	Casi nunca	Casi nunca	Muy a menudo	A menudo	Casi nunca	A menudo	Muy a menudo	Casi nunca	Una a cuatro veces por semana	Todos los dias
25	Mujer	27.8852	Soltero(a)	Una o dos veces a la semana	Nunca	Dos a tres veces al mes	Una vez al mes	Tres a cuatro veces por semama	Tres a cuatro veces por semama	Dos a tres veces al mes	Todos los dias	Una o dos veces a la semana	Todos los dias	Todos los dias	Dos a tres veces al mes	Dos a tres veces al mes	Todos los dias	Siete días	Siete días	Siete días	3	1	Si	Mucho más de lo normal	Más de 1 hora	21-30 min	31-60 min	11-20 min	Sí	3-4 h	6-7 h	0 min	2-3 h	30-60 min	30-60 min	0 min	1-15 min	0 min	De vez en cuando	Casi nunca	Muy a menudo	Muy a menudo	A menudo	Casi nunca	A menudo	A menudo	Casi nunca	Una a cuatro veces por semana	Nunca
47	Hombre	33.8189	Soltero(a)	Todos los dias	Nunca	Nunca	Una o dos veces a la semana	Nunca	Nunca	Nunca	Nunca	Tres a cuatro veces por semama	Una o dos veces a la semana	Una o dos veces a la semana	Dos a tres veces al mes	Tres a cuatro veces por semama	Tres a cuatro veces por semama	Siete días	Siete días	Siete días	3	2	Si	Mucho más de lo normal	31-60 min	21-30 min	31-60 min	31-60 min	Sí	3-4 h	6-7 h	0 min	0 min	30-60 min	0 min	0 min	0 min	30-60 min	De vez en cuando	Nunca	Casi nunca	Muy a menudo	Muy a menudo	Nunca	Muy a menudo	Muy a menudo	Nunca	Todos los dias	Nunca
48	Mujer	28.1969	Casado(a)	Una o dos veces a la semana	Nunca	Una vez al mes	Una vez al mes	Dos a tres veces al mes	Una o dos veces a la semana	Una vez al mes	Una vez al mes	Tres a cuatro veces por semama	Tres a cuatro veces por semama	Tres a cuatro veces por semama	Dos a tres veces al mes	Dos a tres veces al mes	Tres a cuatro veces por semama	Siete días	Siete días	Siete días	3	2	Si	Mucho más de lo normal	0 min	1-10 min	21-30 min	11-20 min	Sí	3-4 h	6-7 h	0 min	30-60 min	1-2 h	16-30 min	0 min	2-3 h	0 min	A menudo	De vez en cuando	De vez en cuando	A menudo	A menudo	De vez en cuando	A menudo	A menudo	Casi nunca	Una a cuatro veces por semana	Nunca
26	Hombre	25.5102	Soltero(a)	Una o dos veces a la semana	Tres a cuatro veces por semama	Dos a tres veces al mes	Una o dos veces a la semana	Una o dos veces a la semana	Dos a tres veces al mes	Dos a tres veces al mes	Una vez al mes	Todos los dias	Todos los dias	Todos los dias	Todos los dias	Todos los dias	Todos los dias	Cinco días	Siete días	Tres dias	2	1	No	Mucho más de lo normal	0 min	1-10 min	21-30 min	1-10 min	No	3-4 h	6-7 h	3-4 h	0 min	0 min	0 min	1-2 h	2-3 h	3-4 h	A menudo	De vez en cuando	Muy a menudo	A menudo	De vez en cuando	De vez en cuando	A menudo	A menudo	De vez en cuando	Una a cuatro veces por semana	Una a cuatro veces por semana
50	Mujer	28.125	Casado(a)	Todos los dias	Nunca	Una vez al mes	Una o dos veces a la semana	Una o dos veces a la semana	Una o dos veces a la semana	Una vez al mes	Nunca	Todos los dias	Todos los dias	Una o dos veces a la semana	Una vez al mes	Dos a tres veces al mes	Todos los dias	Siete días	Siete días	Siete días	2	2	Si	Mucho más de lo normal	0 min	21-30 min	31-60 min	21-30 min	Sí	3-4 h	Más de 7 h	0 min	0 min	0 min	0 min	0 min	1-2 h	1-2 h	A menudo	Casi nunca	De vez en cuando	Muy a menudo	Muy a menudo	Casi nunca	Muy a menudo	A menudo	Casi nunca	Todos los dias	Nunca
36	Mujer	26.0262	Soltero(a)	Todos los dias	Nunca	Tres a cuatro veces por semama	Todos los dias	Tres a cuatro veces por semama	Todos los dias	Una vez al mes	Una vez al mes	Nunca	Todos los dias	Todos los dias	Todos los dias	Todos los dias	Tres a cuatro veces por semama	Siete días	Siete días	Siete días	3	3	Si	Mucho más de lo normal	0 min	Más de 1 h	Más de 1 h	Más de 1 h	Sí	3-4 h	Más de 7 h	0 min	0 min	1-2 h	0 min	0 min	0 min	3-4 h	De vez en cuando	De vez en cuando	Muy a menudo	A menudo	A menudo	Casi nunca	Muy a menudo	A menudo	De vez en cuando	Todos los dias	Nunca
32	Mujer	33.4252	Soltero(a)	Todos los dias	Nunca	Tres a cuatro veces por semama	Tres a cuatro veces por semama	Tres a cuatro veces por semama	Todos los dias	Dos a tres veces al mes	Nunca	Una o dos veces a la semana	Todos los dias	Todos los dias	Dos a tres veces al mes	Dos a tres veces al mes	Todos los dias	Siete días	Siete días	Tres dias	2	2	No	Mucho más de lo normal	16-30 min	31-60 min	31-60 min	31-60 min	Sí	3-4 h	Más de 7 h	0 min	1-2 h	3-4 h	0 min	16-30 min	16-30 min	3-4 h	A menudo	De vez en cuando	A menudo	De vez en cuando	De vez en cuando	De vez en cuando	De vez en cuando	De vez en cuando	De vez en cuando	Todos los dias	Nunca
23	Mujer	28.0102	Soltero(a)	Nunca	Nunca	Tres a cuatro veces por semama	Tres a cuatro veces por semama	Todos los dias	Todos los dias	Dos a tres veces al mes	Nunca	Todos los dias	Todos los dias	Todos los dias	Todos los dias	Nunca	Todos los dias	Siete días	Siete días	Siete días	3	0	Si	Más o menos igual	31-60 min	1-10 min	11-20 min	21-30 min	Sí	3-4 h	Más de 7 h	0 min	0 min	16-30 min	0 min	30-60 min	0 min	0 min	Muy a menudo	A menudo	Muy a menudo	Casi nunca	De vez en cuando	A menudo	De vez en cuando	Casi nunca	Muy a menudo	Nunca	Nunca
25	Mujer	35.0862	Soltero(a)	Una o dos veces a la semana	Nunca	Nunca	Nunca	Nunca	Nunca	Dos a tres veces al mes	Una vez al mes	Tres a cuatro veces por semama	Dos a tres veces al mes	Nunca	Dos a tres veces al mes	Dos a tres veces al mes	Todos los dias	Siete días	Siete días	Siete días	3	1	No	Más o menos igual	0 min	21-30 min	21-30 min	21-30 min	Sí	3-4 h	Más de 7 h	0 min	16-30 min	1-2 h	0 min	1-2 h	1-2 h	0 min	A menudo	Casi nunca	Muy a menudo	De vez en cuando	De vez en cuando	Casi nunca	A menudo	A menudo	Casi nunca	Una a cuatro veces por semana	Nunca
62	Mujer	20.0288	Casado(a)	Dos a tres veces al mes	Nunca	Nunca	Nunca	Dos a tres veces al mes	Nunca	Una o dos veces a la semana	Nunca	Todos los dias	Una o dos veces a la semana	Dos a tres veces al mes	Nunca	Todos los dias	Todos los dias	Siete días	Siete días	Siete días	2	0	Si	Mucho más de lo normal	0 min	11-20 min	21-30 min	21-30 min	Sí	3-4 h	Más de 7 h	0 min	3-4 h	0 min	0 min	0 min	0 min	3-4 h	De vez en cuando	Casi nunca	A menudo	Muy a menudo	Muy a menudo	De vez en cuando	Muy a menudo	Muy a menudo	Casi nunca	Una a tres veces al mes	Nunca
62	Mujer	20.0288	Casado(a)	Dos a tres veces al mes	Nunca	Nunca	Nunca	Dos a tres veces al mes	Nunca	Una o dos veces a la semana	Nunca	Todos los dias	Una o dos veces a la semana	Dos a tres veces al mes	Nunca	Todos los dias	Todos los dias	Siete días	Siete días	Siete días	2	0	Si	Mucho más de lo normal	0 min	11-20 min	21-30 min	21-30 min	Sí	3-4 h	Más de 7 h	0 min	3-4 h	0 min	0 min	0 min	0 min	3-4 h	De vez en cuando	Casi nunca	A menudo	Muy a menudo	Muy a menudo	De vez en cuando	Muy a menudo	Muy a menudo	Casi nunca	Una a tres veces al mes	Nunca
28	Mujer	30.8012	Soltero(a)	Todos los dias	Dos a tres veces al mes	Dos a tres veces al mes	Tres a cuatro veces por semama	Una vez al mes	Una o dos veces a la semana	Tres a cuatro veces por semana	Dos a tres veces al mes	Dos a tres veces al mes	Todos los dias	Una o dos veces a la semana	Todos los dias	Una vez al mes	Todos los dias	Un dia	Un dia	Un dia	3	2	No	Mucho más de lo normal	Más de 1 hora	Más de 1 h	Más de 1 h	Más de 1 h	Sí	3-4 h	Más de 7 h	0 min	1-15 min	0 min	0 min	0 min	1-2 h	2-3 h	A menudo	A menudo	A menudo	De vez en cuando	De vez en cuando	De vez en cuando	A menudo	De vez en cuando	De vez en cuando	Todos los dias	Una a tres veces al mes
26	Hombre	19.2526	Soltero(a)	Todos los dias	Nunca	Nunca	Una vez al mes	Nunca	Nunca	Tres a cuatro veces por semana	Todos los dias	Todos los dias	Todos los dias	Tres a cuatro veces por semama	Tres a cuatro veces por semama	Tres a cuatro veces por semama	Todos los dias	Siete días	Siete días	Siete días	3	3	No	Mucho menos de lo normal	0 min	11-20 min	11-20 min	11-20 min	No	3-4 h	Más de 7 h	1-2 h	0 min	3-4 h	0 min	0 min	1-2 h	0 min	Casi nunca	Casi nunca	De vez en cuando	Casi nunca	A menudo	Casi nunca	Muy a menudo	A menudo	Casi nunca	Todos los dias	Nunca
24	Mujer	23.3726	Soltero(a)	Una o dos veces a la semana	Una vez al mes	Dos a tres veces al mes	Una vez al mes	Dos a tres veces al mes	Dos a tres veces al mes	Una vez al mes	Una vez al mes	Todos los dias	Todos los dias	Todos los dias	Una o dos veces a la semana	Todos los dias	Dos a tres veces al mes	Siete días	Siete días	Siete días	3	2	Si	Un poco más de lo normal	16-30 min	21-30 min	31-60 min	11-20 min	Sí	30-60 min	5-6 h	0 min	0 min	1-15 min	0 min	1-15 min	3-4 h	3-4 h	Muy a menudo	Casi nunca	A menudo	A menudo	A menudo	De vez en cuando	A menudo	A menudo	Casi nunca	Una a cuatro veces por semana	Una a tres veces al mes
18	Mujer	26.2227	Soltero(a)	Una o dos veces a la semana	Nunca	Dos a tres veces al mes	Una o dos veces a la semana	Dos a tres veces al mes	Tres a cuatro veces por semama	Nunca	Nunca	Todos los dias	Tres a cuatro veces por semama	Una o dos veces a la semana	Una vez al mes	Tres a cuatro veces por semama	Tres a cuatro veces por semama	Siete días	Siete días	Siete días	3	1	Si	Un poco más de lo normal	31-60 min	1-10 min	21-30 min	1-10 min	Sí	30-60 min	5-6 h	0 min	16-30 min	1-15 min	0 min	2-3 h	16-30 min	3-4 h	De vez en cuando	De vez en cuando	A menudo	A menudo	A menudo	De vez en cuando	A menudo	De vez en cuando	Casi nunca	Una a cuatro veces por semana	Nunca
57	Mujer	27.2817	Casado(a)	Una o dos veces a la semana	Dos a tres veces al mes	Una vez al mes	Dos a tres veces al mes	Dos a tres veces al mes	Una o dos veces a la semana	Dos a tres veces al mes	Nunca	Todos los dias	Tres a cuatro veces por semama	Dos a tres veces al mes	Una vez al mes	Tres a cuatro veces por semama	Tres a cuatro veces por semama	Siete días	Siete días	Siete días	3	1	Si	Más o menos igual	0 min	11-20 min	31-60 min	21-30 min	Sí	30-60 min	5-6 h	0 min	1-15 min	30-60 min	0 min	1-15 min	16-30 min	16-30 min	De vez en cuando	De vez en cuando	Casi nunca	Muy a menudo	A menudo	Casi nunca	A menudo	A menudo	Casi nunca	Una a cuatro veces por semana	Una a tres veces al mes
25	Mujer	33.8021	Soltero(a)	Dos a tres veces al mes	Tres a cuatro veces por semama	Una o dos veces a la semana	Tres a cuatro veces por semama	Todos los dias	Todos los dias	Dos a tres veces al mes	Nunca	Todos los dias	Una o dos veces a la semana	Dos a tres veces al mes	Tres a cuatro veces por semama	Una o dos veces a la semana	Dos a tres veces al mes	Tres dias	Siete días	Siete días	3	1	Si	Un poco más de lo normal	16-30 min	1-10 min	1-10 min	1-10 min	Sí	30-60 min	5-6 h	0 min	30-60 min	30-60 min	0 min	0 min	1-15 min	0 min	Muy a menudo	A menudo	A menudo	De vez en cuando	De vez en cuando	De vez en cuando	A menudo	De vez en cuando	A menudo	Una a tres veces al mes	Una a cuatro veces por semana
24	Mujer	30.2992	Soltero(a)	Tres a cuatro veces por semama	Tres a cuatro veces por semama	Una vez al mes	Una vez al mes	Dos a tres veces al mes	Una o dos veces a la semana	Dos a tres veces al mes	Una vez al mes	Todos los dias	Todos los dias	Una o dos veces a la semana	Dos a tres veces al mes	Tres a cuatro veces por semama	Todos los dias	Cuatro días	Siete días	Siete días	3	1	No	Un poco más de lo normal	0 min	21-30 min	Más de 1 h	Más de 1 h	Sí	30-60 min	5-6 h	0 min	30-60 min	1-2 h	0 min	1-2 h	2-3 h	16-30 min	Casi nunca	De vez en cuando	A menudo	De vez en cuando	De vez en cuando	De vez en cuando	A menudo	A menudo	De vez en cuando	Una a cuatro veces por semana	Una a cuatro veces por semana
57	Mujer	27.2817	Casado(a)	Una o dos veces a la semana	Dos a tres veces al mes	Una vez al mes	Dos a tres veces al mes	Dos a tres veces al mes	Una o dos veces a la semana	Dos a tres veces al mes	Nunca	Todos los dias	Tres a cuatro veces por semama	Dos a tres veces al mes	Una vez al mes	Tres a cuatro veces por semama	Tres a cuatro veces por semama	Siete días	Siete días	Siete días	3	1	Si	Más o menos igual	0 min	11-20 min	31-60 min	21-30 min	Sí	30-60 min	5-6 h	0 min	1-15 min	30-60 min	0 min	1-15 min	16-30 min	16-30 min	De vez en cuando	De vez en cuando	Casi nunca	Muy a menudo	A menudo	Casi nunca	A menudo	A menudo	Casi nunca	Una a cuatro veces por semana	Una a tres veces al mes
50	Mujer	22.3133	Casado(a)	Nunca	Tres a cuatro veces por semama	Nunca	Nunca	Nunca	Nunca	Nunca	Nunca	Todos los dias	Una vez al mes	Dos a tres veces al mes	Tres a cuatro veces por semama	Nunca	Todos los dias	Siete días	Siete días	Dos días	2	0	Si	Un poco menos de lo normal	0 min	1-10 min	1-10 min	1-10 min	Sí	30-60 min	5-6 h	0 min	16-30 min	0 min	0 min	0 min	0 min	0 min	Casi nunca	Casi nunca	De vez en cuando	A menudo	A menudo	Casi nunca	A menudo	A menudo	Casi nunca	Nunca	Una a cuatro veces por semana
24	Mujer	24.2188	Soltero(a)	Una o dos veces a la semana	Una vez al mes	Nunca	Nunca	Nunca	Nunca	Una vez al mes	Una vez al mes	Todos los dias	Una o dos veces a la semana	Una o dos veces a la semana	Dos a tres veces al mes	Dos a tres veces al mes	Tres a cuatro veces por semama	Siete días	Siete días	Siete días	4	1	Si	Un poco menos de lo normal	16-30 min	21-30 min	21-30 min	21-30 min	Sí	30-60 min	5-6 h	0 min	0 min	2-3 h	0 min	2-3 h	3-4 h	0 min	A menudo	A menudo	A menudo	A menudo	A menudo	De vez en cuando	A menudo	Muy a menudo	De vez en cuando	Una a cuatro veces por semana	Una a tres veces al mes
33	Hombre	40.8163	Soltero(a)	Una o dos veces a la semana	Nunca	Nunca	Nunca	Dos a tres veces al mes	Una vez al mes	Nunca	Nunca	Todos los dias	Dos a tres veces al mes	Una vez al mes	Una vez al mes	Nunca	Todos los dias	Siete días	Siete días	Siete días	3	1	Si	Un poco más de lo normal	1-15 min	1-10 min	11-20 min	11-20 min	Sí	30-60 min	5-6 h	6-7 h	16-30 min	16-30 min	16-30 min	1-2 h	1-2 h	16-30 min	Casi nunca	Casi nunca	De vez en cuando	A menudo	De vez en cuando	Casi nunca	De vez en cuando	De vez en cuando	Casi nunca	Una a cuatro veces por semana	Nunca
32	Hombre	29.4547	Soltero(a)	Una o dos veces a la semana	Tres a cuatro veces por semama	Una vez al mes	Dos a tres veces al mes	Nunca	Una vez al mes	Dos a tres veces al mes	Una vez al mes	Todos los dias	Tres a cuatro veces por semama	Todos los dias	Dos a tres veces al mes	Una vez al mes	Todos los dias	Un dia	Siete días	Siete días	3	1	Si	Mucho más de lo normal	31-60 min	1-10 min	1-10 min	1-10 min	Sí	30-60 min	6-7 h	0 min	1-15 min	1-15 min	0 min	16-30 min	30-60 min	30-60 min	Casi nunca	Casi nunca	A menudo	A menudo	A menudo	Casi nunca	Muy a menudo	Muy a menudo	De vez en cuando	Una a cuatro veces por semana	Una a cuatro veces por semana
54	Hombre	29.7576	Separado(a)	Todos los dias	Nunca	Una vez al mes	Tres a cuatro veces por semama	Nunca	Nunca	Nunca	Nunca	Todos los dias	Nunca	Nunca	Nunca	Una o dos veces a la semana	Todos los dias	Siete días	Siete días	Siete días	3	1	No	Más o menos igual	0 min	11-20 min	21-30 min	21-30 min	Sí	30-60 min	6-7 h	0 min	0 min	0 min	0 min	0 min	1-15 min	16-30 min	De vez en cuando	De vez en cuando	De vez en cuando	Muy a menudo	A menudo	Casi nunca	A menudo	A menudo	Casi nunca	Todos los dias	Nunca
30	Mujer	24.2188	Casado(a)	Todos los dias	Una vez al mes	Una vez al mes	Una vez al mes	Dos a tres veces al mes	Todos los dias	Una vez al mes	Una vez al mes	Todos los dias	Tres a cuatro veces por semama	Tres a cuatro veces por semama	Una vez al mes	Tres a cuatro veces por semama	Todos los dias	Siete días	Siete días	Siete días	3	2	Si	Un poco más de lo normal	1-15 min	21-30 min	21-30 min	21-30 min	No	30-60 min	6-7 h	0 min	0 min	16-30 min	3-4 h	1-15 min	1-15 min	16-30 min	A menudo	A menudo	Muy a menudo	Casi nunca	De vez en cuando	A menudo	De vez en cuando	De vez en cuando	A menudo	Todos los dias	Una a tres veces al mes
27	Mujer	29.4078	Soltero(a)	Todos los dias	Tres a cuatro veces por semama	Tres a cuatro veces por semama	Todos los dias	Todos los dias	Todos los dias	Tres a cuatro veces por semana	Dos a tres veces al mes	Una vez al mes	Todos los dias	Dos a tres veces al mes	Todos los dias	Dos a tres veces al mes	Todos los dias	Tres dias	Siete días	Siete días	3	2	No	Un poco más de lo normal	16-30 min	1-10 min	11-20 min	11-20 min	Sí	30-60 min	6-7 h	0 min	0 min	16-30 min	3-4 h	0 min	1-15 min	0 min	A menudo	Muy a menudo	Muy a menudo	Casi nunca	Casi nunca	Casi nunca	Casi nunca	Casi nunca	Casi nunca	Todos los dias	Una a cuatro veces por semana
18	Mujer	19.3772	Soltero(a)	Todos los dias	Tres a cuatro veces por semama	Tres a cuatro veces por semama	Todos los dias	Todos los dias	Todos los dias	Nunca	Nunca	Todos los dias	Todos los dias	Una o dos veces a la semana	Todos los dias	Una o dos veces a la semana	Todos los dias	Siete días	Siete días	Cinco días	4	1	Si	Un poco más de lo normal	1-15 min	11-20 min	11-20 min	11-20 min	Sí	30-60 min	6-7 h	1-15 min	30-60 min	16-30 min	1-15 min	30-60 min	30-60 min	1-2 h	A menudo	Muy a menudo	Muy a menudo	Casi nunca	Casi nunca	A menudo	Casi nunca	Casi nunca	Muy a menudo	Todos los dias	Una a cuatro veces por semana
19	Hombre	27.4717	Soltero(a)	Una o dos veces a la semana	Nunca	Nunca	Dos a tres veces al mes	Una vez al mes	Nunca	Una vez al mes	Una vez al mes	Todos los dias	Una o dos veces a la semana	Todos los dias	Una vez al mes	Una vez al mes	Todos los dias	Siete días	Siete días	Siete días	5	1	No	Más o menos igual	16-30 min	11-20 min	11-20 min	11-20 min	No	30-60 min	6-7 h	1-15 min	0 min	1-15 min	0 min	0 min	1-2 h	0 min	De vez en cuando	Casi nunca	De vez en cuando	A menudo	A menudo	Casi nunca	A menudo	De vez en cuando	Casi nunca	Una a cuatro veces por semana	Nunca
19	Hombre	20.4152	Soltero(a)	Todos los dias	Una vez al mes	Una o dos veces a la semana	Una vez al mes	Nunca	Nunca	Dos a tres veces al mes	Nunca	Todos los dias	Dos a tres veces al mes	Una o dos veces a la semana	Una o dos veces a la semana	Una o dos veces a la semana	Todos los dias	Siete días	Siete días	Siete días	3	2	No	Un poco más de lo normal	0 min	11-20 min	11-20 min	11-20 min	Sí	30-60 min	6-7 h	1-2 h	30-60 min	1-2 h	0 min	0 min	3-4 h	16-30 min	De vez en cuando	Casi nunca	A menudo	A menudo	De vez en cuando	De vez en cuando	A menudo	De vez en cuando	A menudo	Todos los dias	Una a tres veces al mes
31	Mujer	37.5567	Soltero(a)	Una o dos veces a la semana	Nunca	Nunca	Dos a tres veces al mes	Nunca	Todos los dias	Dos a tres veces al mes	Dos a tres veces al mes	Una o dos veces a la semana	Todos los dias	Tres a cuatro veces por semama	Todos los dias	Una o dos veces a la semana	Todos los dias	Tres dias	Siete días	Cinco días	3	1	No	Mucho más de lo normal	16-30 min	1-10 min	11-20 min	1-10 min	Sí	30-60 min	Más de 7 h	0 min	1-2 h	16-30 min	0 min	0 min	30-60 min	3-4 h	De vez en cuando	Casi nunca	Muy a menudo	Muy a menudo	De vez en cuando	De vez en cuando	Muy a menudo	Muy a menudo	De vez en cuando	Una a cuatro veces por semana	Nunca
24	Mujer	24	Soltero(a)	Dos a tres veces al mes	Nunca	Dos a tres veces al mes	Una vez al mes	Nunca	Dos a tres veces al mes	Dos a tres veces al mes	Dos a tres veces al mes	Todos los dias	Una o dos veces a la semana	Una vez al mes	Una o dos veces a la semana	Dos a tres veces al mes	Todos los dias	Siete días	Siete días	Un dia	1	1	No	Un poco más de lo normal	31-60 min	1-10 min	21-30 min	0 min	Sí	30-60 min	Más de 7 h	0 min	0 min	1-15 min	30-60 min	0 min	0 min	0 min	Casi nunca	Casi nunca	De vez en cuando	A menudo	A menudo	De vez en cuando	A menudo	A menudo	Casi nunca	Una a tres veces al mes	Nunca
54	Hombre	27.4406	Casado(a)	Tres a cuatro veces por semama	Una vez al mes	Nunca	Una vez al mes	Nunca	Nunca	Una vez al mes	Nunca	Tres a cuatro veces por semama	Dos a tres veces al mes	Dos a tres veces al mes	Nunca	Todos los dias	Tres a cuatro veces por semama	Siete días	Siete días	Cuatro días	2	1	No	Un poco más de lo normal	0 min	31-60 min	21-30 min	21-30 min	Sí	30-60 min	Más de 7 h	0 min	2-3 h	30-60 min	0 min	0 min	2-3 h	0 min	De vez en cuando	Nunca	Nunca	A menudo	A menudo	Nunca	Muy a menudo	A menudo	Casi nunca	Una a cuatro veces por semana	Una a tres veces al mes
20	Mujer	18.591	Soltero(a)	Tres a cuatro veces por semama	Nunca	Dos a tres veces al mes	Dos a tres veces al mes	Nunca	Nunca	Una o dos veces a la semana	Dos a tres veces al mes	Tres a cuatro veces por semama	Todos los dias	Todos los dias	Una o dos veces a la semana	Dos a tres veces al mes	Todos los dias	Siete días	Siete días	Cinco días	3	2	No	Mucho más de lo normal	0 min	1-10 min	31-60 min	11-20 min	Sí	30-60 min	Más de 7 h	0 min	3-4 h	16-30 min	0 min	0 min	2-3 h	3-4 h	De vez en cuando	A menudo	Muy a menudo	De vez en cuando	De vez en cuando	A menudo	De vez en cuando	De vez en cuando	De vez en cuando	Una a cuatro veces por semana	Nunca
27	Mujer	22.3703	Soltero(a)	Una o dos veces a la semana	Nunca	Una o dos veces a la semana	Una vez al mes	Nunca	Una vez al mes	Nunca	Nunca	Todos los dias	Dos a tres veces al mes	Una vez al mes	Una vez al mes	Tres a cuatro veces por semama	Tres a cuatro veces por semama	Siete días	Siete días	Cinco días	3	1	Si	Mucho más de lo normal	1-15 min	21-30 min	21-30 min	21-30 min	Sí	30-60 min	Más de 7 h	0 min	3-4 h	0 min	0 min	30-60 min	30-60 min	0 min	De vez en cuando	Casi nunca	De vez en cuando	A menudo	A menudo	Casi nunca	A menudo	A menudo	Casi nunca	Una a cuatro veces por semana	Nunca
20	Mujer	23.8087	Soltero(a)	Todos los dias	Una o dos veces a la semana	Una o dos veces a la semana	Una o dos veces a la semana	Una o dos veces a la semana	Todos los dias	Una vez al mes	Nunca	Todos los dias	Tres a cuatro veces por semama	Tres a cuatro veces por semama	Dos a tres veces al mes	Dos a tres veces al mes	Todos los dias	Cinco días	Siete días	Seis días	3	1	Si	Mucho más de lo normal	1-15 min	1-10 min	21-30 min	21-30 min	Sí	30-60 min	Más de 7 h	0 min	0 min	2-3 h	3-4 h	3-4 h	3-4 h	3-4 h	De vez en cuando	De vez en cuando	Muy a menudo	De vez en cuando	A menudo	A menudo	Muy a menudo	A menudo	De vez en cuando	Todos los dias	Una a cuatro veces por semana
22	Mujer	29.3848	Soltero(a)	Todos los dias	Nunca	Una o dos veces a la semana	Todos los dias	Todos los dias	Todos los dias	Nunca	Nunca	Todos los dias	Todos los dias	Una o dos veces a la semana	Dos a tres veces al mes	Dos a tres veces al mes	Todos los dias	Siete días	Siete días	Siete días	3	2	Si	Mucho más de lo normal	0 min	11-20 min	31-60 min	11-20 min	Sí	30-60 min	Más de 7 h	0 min	16-30 min	30-60 min	0 min	3-4 h	3-4 h	3-4 h	A menudo	A menudo	Muy a menudo	De vez en cuando	De vez en cuando	De vez en cuando	De vez en cuando	De vez en cuando	A menudo	Todos los dias	Nunca
35	Mujer	23.8281	Soltero(a)	Todos los dias	Nunca	Dos a tres veces al mes	Una vez al mes	Dos a tres veces al mes	Nunca	Una vez al mes	Nunca	Todos los dias	Dos a tres veces al mes	Todos los dias	Todos los dias	Nunca	Dos a tres veces al mes	Siete días	Siete días	Siete días	3	2	Si	Mucho más de lo normal	0 min	1-10 min	21-30 min	21-30 min	Sí	30-60 min	Más de 7 h	30-60 min	0 min	0 min	0 min	30-60 min	0 min	0 min	Muy a menudo	A menudo	Muy a menudo	Muy a menudo	A menudo	De vez en cuando	Muy a menudo	A menudo	De vez en cuando	Todos los dias	Nunca
34	Mujer	17.4191	Soltero(a)	Nunca	Todos los dias	Nunca	Nunca	Una o dos veces a la semana	Nunca	Una o dos veces a la semana	Nunca	Todos los dias	Dos a tres veces al mes	Una o dos veces a la semana	Dos a tres veces al mes	Una vez al mes	Todos los dias	Cinco días	Siete días	Siete días	3	1	Si	Más o menos igual	0 min	1-10 min	1-10 min	1-10 min	No	5-6 h	0 min	0 min	0 min	0 min	0 min	0 min	0 min	0 min	Nunca	Casi nunca	Casi nunca	A menudo	Muy a menudo	Casi nunca	A menudo	A menudo	Casi nunca	Nunca	Todos los dias
35	Mujer	31.245	Casado(a)	Todos los dias	Tres a cuatro veces por semama	Todos los dias	Tres a cuatro veces por semama	Una o dos veces a la semana	Todos los dias	Una o dos veces a la semana	Nunca	Todos los dias	Tres a cuatro veces por semama	Tres a cuatro veces por semama	Una vez al mes	Dos a tres veces al mes	Todos los dias	Siete días	Siete días	Siete días	3	1	No	Un poco más de lo normal	0 min	21-30 min	31-60 min	31-60 min	No	5-6 h	0 min	0 min	0 min	1-2 h	3-4 h	0 min	3-4 h	0 min	De vez en cuando	A menudo	Muy a menudo	De vez en cuando	De vez en cuando	De vez en cuando	De vez en cuando	De vez en cuando	De vez en cuando	Todos los dias	Una a cuatro veces por semana
41	Mujer	31.25	Casado(a)	Todos los dias	Tres a cuatro veces por semama	Una vez al mes	Tres a cuatro veces por semama	Todos los dias	Todos los dias	Tres a cuatro veces por semana	Nunca	Una vez al mes	Todos los dias	Dos a tres veces al mes	Una o dos veces a la semana	Una vez al mes	Todos los dias	Cuatro días	Cuatro días	Cuatro días	3	3	No	Mucho más de lo normal	Más de 1 hora	1-10 min	1-10 min	1-10 min	No	5-6 h	1-15 min	6-7 h	0 min	1-15 min	0 min	0 min	0 min	0 min	De vez en cuando	De vez en cuando	A menudo	De vez en cuando	De vez en cuando	De vez en cuando	De vez en cuando	De vez en cuando	De vez en cuando	Todos los dias	Una a cuatro veces por semana
46	Mujer	30.385	Casado(a)	Nunca	Una vez al mes	Nunca	Todos los dias	Dos a tres veces al mes	Todos los dias	Nunca	Nunca	Todos los dias	Nunca	Nunca	Nunca	Una vez al mes	Todos los dias	Siete días	Siete días	Tres dias	2	0	Si	Mucho más de lo normal	16-30 min	1-10 min	11-20 min	0 min	No	5-6 h	1-2 h	0 min	1-2 h	30-60 min	3-4 h	0 min	1-2 h	0 min	Muy a menudo	Muy a menudo	Muy a menudo	Casi nunca	De vez en cuando	A menudo	De vez en cuando	Casi nunca	A menudo	Nunca	Una a tres veces al mes
24	Mujer	30.0433	Casado(a)	Todos los dias	Dos a tres veces al mes	Todos los dias	Todos los dias	Todos los dias	Todos los dias	Dos a tres veces al mes	Nunca	Dos a tres veces al mes	Todos los dias	Una o dos veces a la semana	Todos los dias	Una o dos veces a la semana	Todos los dias	Siete días	Siete días	Siete días	3	3	No	Un poco más de lo normal	16-30 min	1-10 min	21-30 min	11-20 min	No	5-6 h	1-2 h	0 min	0 min	30-60 min	3-4 h	1-2 h	3-4 h	0 min	De vez en cuando	Muy a menudo	Muy a menudo	Nunca	Casi nunca	Muy a menudo	De vez en cuando	Casi nunca	Muy a menudo	Todos los dias	Una a tres veces al mes
23	Mujer	22.5827	Soltero(a)	Una o dos veces a la semana	Tres a cuatro veces por semama	Nunca	Nunca	Nunca	Nunca	Tres a cuatro veces por semana	Nunca	Todos los dias	Tres a cuatro veces por semama	Dos a tres veces al mes	Nunca	Nunca	Nunca	Tres dias	Siete días	Siete días	2	0	Si	Mucho más de lo normal	31-60 min	1-10 min	21-30 min	21-30 min	Sí	5-6 h	1-2 h	0 min	0 min	30-60 min	0 min	0 min	16-30 min	0 min	De vez en cuando	De vez en cuando	De vez en cuando	A menudo	Muy a menudo	Muy a menudo	Muy a menudo	Muy a menudo	Nunca	Una a cuatro veces por semana	Una a cuatro veces por semana
22	Mujer	20.7008	Soltero(a)	Todos los dias	Una o dos veces a la semana	Dos a tres veces al mes	Tres a cuatro veces por semama	Nunca	Nunca	Dos a tres veces al mes	Nunca	Todos los dias	Una o dos veces a la semana	Una o dos veces a la semana	Una o dos veces a la semana	Nunca	Una o dos veces a la semana	Cinco días	Siete días	Siete días	5	0	No	Mucho más de lo normal	16-30 min	21-30 min	21-30 min	21-30 min	Sí	5-6 h	16-30 min	0 min	16-30 min	0 min	0 min	30-60 min	1-2 h	0 min	Casi nunca	A menudo	De vez en cuando	A menudo	A menudo	Casi nunca	A menudo	A menudo	De vez en cuando	Todos los dias	Una a cuatro veces por semana
65	Hombre	26.0933	Casado(a)	Todos los dias	Todos los dias	Dos a tres veces al mes	Dos a tres veces al mes	Dos a tres veces al mes	Nunca	Dos a tres veces al mes	Nunca	Todos los dias	Tres a cuatro veces por semama	Tres a cuatro veces por semama	Dos a tres veces al mes	Una o dos veces a la semana	Todos los dias	Un dia	Siete días	Siete días	1	1	No	Más o menos igual	0 min	0 min	11-20 min	11-20 min	Sí	5-6 h	2-3 h	0 min	0 min	1-15 min	0 min	0 min	16-30 min	0 min	Casi nunca	Casi nunca	De vez en cuando	A menudo	De vez en cuando	De vez en cuando	A menudo	A menudo	Casi nunca	Todos los dias	Todos los dias
31	Mujer	38.2934	Soltero(a)	Una o dos veces a la semana	Nunca	Todos los dias	Tres a cuatro veces por semama	Una o dos veces a la semana	Una vez al mes	Nunca	Nunca	Dos a tres veces al mes	Una o dos veces a la semana	Una o dos veces a la semana	Tres a cuatro veces por semama	Nunca	Todos los dias	Tres dias	Siete días	Siete días	1	0	Si	Un poco más de lo normal	31-60 min	1-10 min	31-60 min	21-30 min	Sí	5-6 h	2-3 h	0 min	16-30 min	3-4 h	1-2 h	0 min	30-60 min	3-4 h	De vez en cuando	Casi nunca	Casi nunca	A menudo	A menudo	Casi nunca	Casi nunca	A menudo	Casi nunca	Una a cuatro veces por semana	Nunca
33	Mujer	27.6888	Soltero(a)	Tres a cuatro veces por semama	Una o dos veces a la semana	Una vez al mes	Nunca	Dos a tres veces al mes	Una vez al mes	Nunca	Nunca	Todos los dias	Todos los dias	Todos los dias	Una vez al mes	Dos a tres veces al mes	Tres a cuatro veces por semama	Siete días	Siete días	Un dia	2	2	Si	Más o menos igual	0 min	21-30 min	31-60 min	0 min	No	5-6 h	2-3 h	0 min	2-3 h	3-4 h	0 min	0 min	3-4 h	30-60 min	De vez en cuando	Muy a menudo	A menudo	De vez en cuando	De vez en cuando	Casi nunca	De vez en cuando	Casi nunca	A menudo	Una a cuatro veces por semana	Una a cuatro veces por semana
51	Mujer	18.3655	Casado(a)	Todos los dias	Nunca	Nunca	Nunca	Nunca	Nunca	Nunca	Nunca	Tres a cuatro veces por semama	Todos los dias	Todos los dias	Nunca	Una o dos veces a la semana	Nunca	Siete días	Siete días	Siete días	2	2	Si	Más o menos igual	Más de 1 hora	11-20 min	11-20 min	11-20 min	Sí	5-6 h	2-3 h	0 min	2-3 h	3-4 h	0 min	0 min	30-60 min	0 min	A menudo	De vez en cuando	De vez en cuando	A menudo	A menudo	Casi nunca	A menudo	De vez en cuando	Nunca	Todos los dias	Nunca
34	Mujer	30.4832	Soltero(a)	Todos los dias	Una o dos veces a la semana	Nunca	Dos a tres veces al mes	Todos los dias	Una o dos veces a la semana	Una vez al mes	Nunca	Todos los dias	Una o dos veces a la semana	Nunca	Una vez al mes	Una o dos veces a la semana	Todos los dias	Siete días	Siete días	Seis días	3	2	Si	Un poco más de lo normal	31-60 min	11-20 min	11-20 min	11-20 min	Sí	5-6 h	2-3 h	0 min	1-2 h	0 min	2-3 h	0 min	0 min	0 min	Muy a menudo	A menudo	Muy a menudo	Casi nunca	Casi nunca	De vez en cuando	A menudo	De vez en cuando	Muy a menudo	Todos los dias	Una a cuatro veces por semana
25	Mujer	24	Soltero(a)	Tres a cuatro veces por semama	Tres a cuatro veces por semama	Nunca	Todos los dias	Nunca	Todos los dias	Dos a tres veces al mes	Dos a tres veces al mes	Tres a cuatro veces por semama	Una o dos veces a la semana	Una o dos veces a la semana	Dos a tres veces al mes	Todos los dias	Nunca	Seis días	Siete días	Cinco días	1	2	No	Mucho más de lo normal	0 min	1-10 min	31-60 min	11-20 min	No	5-6 h	2-3 h	1-2 h	0 min	16-30 min	0 min	0 min	1-2 h	0 min	A menudo	A menudo	A menudo	De vez en cuando	De vez en cuando	De vez en cuando	A menudo	De vez en cuando	De vez en cuando	Una a cuatro veces por semana	Una a cuatro veces por semana
55	Mujer	29.2101	Casado(a)	Tres a cuatro veces por semama	Dos a tres veces al mes	Nunca	Nunca	Una vez al mes	Dos a tres veces al mes	Nunca	Nunca	Todos los dias	Una o dos veces a la semana	Una o dos veces a la semana	Dos a tres veces al mes	Tres a cuatro veces por semama	Todos los dias	Siete días	Siete días	Cuatro días	2	0	Si	Mucho más de lo normal	31-60 min	11-20 min	21-30 min	11-20 min	Sí	5-6 h	2-3 h	16-30 min	0 min	16-30 min	0 min	30-60 min	16-30 min	1-15 min	A menudo	De vez en cuando	De vez en cuando	A menudo	De vez en cuando	De vez en cuando	A menudo	A menudo	De vez en cuando	Una a cuatro veces por semana	Una a tres veces al mes
38	Mujer	25	Soltero(a)	Nunca	Nunca	Tres a cuatro veces por semama	Nunca	Tres a cuatro veces por semama	Todos los dias	Nunca	Nunca	Todos los dias	Nunca	Dos a tres veces al mes	Dos a tres veces al mes	Todos los dias	Todos los dias	Siete días	Siete días	Siete días	3	0	Si	Mucho menos de lo normal	0 min	1-10 min	11-20 min	1-10 min	Sí	5-6 h	3-4 h	0 min	0 min	0 min	0 min	30-60 min	1-2 h	0 min	Muy a menudo	A menudo	Muy a menudo	De vez en cuando	De vez en cuando	De vez en cuando	De vez en cuando	De vez en cuando	Muy a menudo	Nunca	Nunca
18	Mujer	18.9866	Soltero(a)	Una o dos veces a la semana	Una vez al mes	Una vez al mes	Una vez al mes	Nunca	Tres a cuatro veces por semama	Dos a tres veces al mes	Nunca	Todos los dias	Todos los dias	Dos a tres veces al mes	Todos los dias	Todos los dias	Tres a cuatro veces por semama	Seis días	Siete días	Seis días	3	1	No	Mucho más de lo normal	Más de 1 hora	11-20 min	21-30 min	1-10 min	No	5-6 h	3-4 h	2-3 h	0 min	0 min	0 min	0 min	16-30 min	3-4 h	Casi nunca	De vez en cuando	De vez en cuando	A menudo	De vez en cuando	De vez en cuando	A menudo	Muy a menudo	Nunca	Una a cuatro veces por semana	Una a tres veces al mes
27	Mujer	42.5781	Soltero(a)	Una o dos veces a la semana	Nunca	Nunca	Tres a cuatro veces por semama	Dos a tres veces al mes	Una vez al mes	Nunca	Nunca	Todos los dias	Dos a tres veces al mes	Una o dos veces a la semana	Una o dos veces a la semana	Una o dos veces a la semana	Todos los dias	Siete días	Siete días	Siete días	3	1	Si	Más o menos igual	0 min	21-30 min	21-30 min	21-30 min	Sí	5-6 h	5-6 h	0 min	2-3 h	1-2 h	1-2 h	1-2 h	3-4 h	0 min	De vez en cuando	De vez en cuando	De vez en cuando	A menudo	A menudo	De vez en cuando	De vez en cuando	A menudo	De vez en cuando	Una a cuatro veces por semana	Nunca
33	Mujer	24.0346	Casado(a)	Todos los dias	Nunca	Todos los dias	Nunca	Todos los dias	Todos los dias	Nunca	Nunca	Todos los dias	Una vez al mes	Todos los dias	Tres a cuatro veces por semama	Todos los dias	Todos los dias	Siete días	Siete días	Siete días	5	3	Si	Mucho más de lo normal	Más de 1 hora	Más de 1 h	Más de 1 h	Más de 1 h	No	5-6 h	5-6 h	0 min	3-4 h	3-4 h	3-4 h	3-4 h	3-4 h	0 min	Nunca	De vez en cuando	De vez en cuando	Muy a menudo	Muy a menudo	Muy a menudo	Muy a menudo	Muy a menudo	Muy a menudo	Todos los dias	Nunca
31	Mujer	25.3906	Soltero(a)	Todos los dias	Una o dos veces a la semana	Nunca	Tres a cuatro veces por semama	Nunca	Nunca	Nunca	Nunca	Todos los dias	Todos los dias	Todos los dias	Tres a cuatro veces por semama	Una o dos veces a la semana	Todos los dias	Cinco días	Siete días	Siete días	3	2	Si	Mucho más de lo normal	0 min	21-30 min	31-60 min	21-30 min	No	5-6 h	5-6 h	0 min	30-60 min	1-2 h	0 min	0 min	2-3 h	0 min	Muy a menudo	Nunca	Muy a menudo	Casi nunca	De vez en cuando	Muy a menudo	Casi nunca	Casi nunca	Muy a menudo	Todos los dias	Una a cuatro veces por semana
22	Mujer	25.6312	Soltero(a)	Todos los dias	Nunca	Dos a tres veces al mes	Tres a cuatro veces por semama	Una vez al mes	Una vez al mes	Nunca	Nunca	Todos los dias	Una o dos veces a la semana	Tres a cuatro veces por semama	Tres a cuatro veces por semama	Dos a tres veces al mes	Todos los dias	Siete días	Siete días	Siete días	3	2	Si	Un poco más de lo normal	0 min	21-30 min	21-30 min	21-30 min	No	5-6 h	5-6 h	0 min	0 min	0 min	0 min	0 min	0 min	0 min	De vez en cuando	De vez en cuando	De vez en cuando	A menudo	De vez en cuando	De vez en cuando	A menudo	A menudo	Casi nunca	Todos los dias	Nunca
23	Mujer	26.3702	Soltero(a)	Tres a cuatro veces por semama	Nunca	Dos a tres veces al mes	Una o dos veces a la semana	Dos a tres veces al mes	Todos los dias	Dos a tres veces al mes	Nunca	Todos los dias	Una o dos veces a la semana	Tres a cuatro veces por semama	Una o dos veces a la semana	Tres a cuatro veces por semama	Todos los dias	Siete días	Siete días	Siete días	3	1	Si	Mucho más de lo normal	0 min	11-20 min	11-20 min	11-20 min	Sí	5-6 h	5-6 h	0 min	16-30 min	0 min	0 min	0 min	30-60 min	0 min	A menudo	De vez en cuando	Muy a menudo	Casi nunca	De vez en cuando	A menudo	De vez en cuando	Casi nunca	A menudo	Una a cuatro veces por semana	Nunca
18	Mujer	31.5886	Soltero(a)	Una vez al mes	Nunca	Dos a tres veces al mes	Nunca	Una o dos veces a la semana	Una o dos veces a la semana	Una o dos veces a la semana	Nunca	Todos los dias	Una vez al mes	Una vez al mes	Todos los dias	Nunca	Todos los dias	Cuatro días	Siete días	Siete días	3	2	No	Mucho más de lo normal	Más de 1 hora	31-60 min	Más de 1 h	Más de 1 h	Sí	5-6 h	5-6 h	0 min	1-2 h	0 min	0 min	0 min	3-4 h	1-2 h	De vez en cuando	De vez en cuando	Muy a menudo	De vez en cuando	A menudo	A menudo	De vez en cuando	A menudo	A menudo	Una a tres veces al mes	Nunca
28	Mujer	22.151	Soltero(a)	Dos a tres veces al mes	Tres a cuatro veces por semama	Nunca	Una vez al mes	Una vez al mes	Nunca	Nunca	Nunca	Todos los dias	Todos los dias	Dos a tres veces al mes	Dos a tres veces al mes	Una vez al mes	Una vez al mes	Tres dias	Siete días	Dos días	2	1	Si	Un poco más de lo normal	1-15 min	21-30 min	21-30 min	0 min	Sí	5-6 h	5-6 h	0 min	30-60 min	30-60 min	0 min	0 min	16-30 min	16-30 min	Muy a menudo	A menudo	A menudo	Muy a menudo	De vez en cuando	A menudo	A menudo	Casi nunca	Muy a menudo	Una a tres veces al mes	Una a cuatro veces por semana
32	Mujer	30.3302	Casado(a)	Todos los dias	Nunca	Dos a tres veces al mes	Tres a cuatro veces por semama	Tres a cuatro veces por semama	Todos los dias	Tres a cuatro veces por semana	Nunca	Una o dos veces a la semana	Todos los dias	Todos los dias	Todos los dias	Nunca	Todos los dias	Siete días	Siete días	Tres dias	5	2	Si	Un poco menos de lo normal	16-30 min	21-30 min	21-30 min	1-10 min	Sí	5-6 h	5-6 h	0 min	0 min	0 min	2-3 h	0 min	0 min	0 min	A menudo	De vez en cuando	Muy a menudo	A menudo	De vez en cuando	De vez en cuando	De vez en cuando	De vez en cuando	De vez en cuando	Todos los dias	Nunca
22	Mujer	30.7574	Soltero(a)	Tres a cuatro veces por semama	Dos a tres veces al mes	Todos los dias	Dos a tres veces al mes	Nunca	Nunca	Dos a tres veces al mes	Nunca	Todos los dias	Dos a tres veces al mes	Dos a tres veces al mes	Una o dos veces a la semana	Dos a tres veces al mes	Tres a cuatro veces por semama	Siete días	Siete días	Cinco días	2	2	No	Un poco más de lo normal	0 min	Más de 1 h	Más de 1 h	11-20 min	No	5-6 h	5-6 h	0 min	0 min	30-60 min	2-3 h	0 min	0 min	0 min	Casi nunca	De vez en cuando	A menudo	De vez en cuando	A menudo	Casi nunca	A menudo	A menudo	Casi nunca	Una a cuatro veces por semana	Una a tres veces al mes
22	Hombre	31.4815	Soltero(a)	Todos los dias	Una vez al mes	Una o dos veces a la semana	Una o dos veces a la semana	Todos los dias	Todos los dias	Una o dos veces a la semana	Nunca	Todos los dias	Tres a cuatro veces por semama	Una o dos veces a la semana	Dos a tres veces al mes	Una vez al mes	Nunca	Cuatro días	Siete días	Siete días	3	2	No	Mucho más de lo normal	16-30 min	21-30 min	31-60 min	21-30 min	Sí	5-6 h	5-6 h	0 min	0 min	16-30 min	0 min	3-4 h	30-60 min	0 min	A menudo	De vez en cuando	A menudo	De vez en cuando	A menudo	A menudo	De vez en cuando	Casi nunca	A menudo	Todos los dias	Una a tres veces al mes
22	Mujer	23.4952	Soltero(a)	Tres a cuatro veces por semama	Nunca	Una o dos veces a la semana	Dos a tres veces al mes	Una vez al mes	Dos a tres veces al mes	Nunca	Nunca	Tres a cuatro veces por semama	Todos los dias	Una o dos veces a la semana	Tres a cuatro veces por semama	Una o dos veces a la semana	Todos los dias	Dos días	Un dia	Un dia	2	2	No	Mucho más de lo normal	Más de 1 hora	21-30 min	31-60 min	11-20 min	Sí	5-6 h	5-6 h	1-15 min	2-3 h	16-30 min	0 min	1-2 h	1-2 h	2-3 h	A menudo	A menudo	A menudo	De vez en cuando	De vez en cuando	A menudo	A menudo	De vez en cuando	A menudo	Una a cuatro veces por semana	Nunca
32	Mujer	25.2092	Soltero(a)	Todos los dias	Una vez al mes	Dos a tres veces al mes	Dos a tres veces al mes	Dos a tres veces al mes	Dos a tres veces al mes	Nunca	Una vez al mes	Todos los dias	Dos a tres veces al mes	Una vez al mes	Nunca	Dos a tres veces al mes	Nunca	Siete días	Siete días	Siete días	3	2	Si	Mucho más de lo normal	31-60 min	Más de 1 h	Más de 1 h	Más de 1 h	No	5-6 h	5-6 h	1-2 h	16-30 min	3-4 h	3-4 h	0 min	3-4 h	1-2 h	De vez en cuando	De vez en cuando	De vez en cuando	De vez en cuando	De vez en cuando	De vez en cuando	De vez en cuando	De vez en cuando	De vez en cuando	Todos los dias	Una a tres veces al mes
32	Mujer	41.0884	Soltero(a)	Todos los dias	Nunca	Una o dos veces a la semana	Tres a cuatro veces por semama	Nunca	Nunca	Dos a tres veces al mes	Una vez al mes	Todos los dias	Tres a cuatro veces por semama	Tres a cuatro veces por semama	Tres a cuatro veces por semama	Tres a cuatro veces por semama	Todos los dias	Siete días	Siete días	Siete días	3	2	No	Más o menos igual	0 min	31-60 min	31-60 min	31-60 min	Sí	5-6 h	5-6 h	30-60 min	16-30 min	0 min	0 min	0 min	2-3 h	0 min	Nunca	Nunca	Nunca	Muy a menudo	Muy a menudo	Nunca	Muy a menudo	Muy a menudo	Casi nunca	Todos los dias	Nunca
31	Hombre	24.0569	Soltero(a)	Una o dos veces a la semana	Nunca	Una vez al mes	Una vez al mes	Una vez al mes	Dos a tres veces al mes	Todos los dias	Dos a tres veces al mes	Nunca	Todos los dias	Todos los dias	Todos los dias	Una o dos veces a la semana	Todos los dias	Siete días	Siete días	Cuatro días	3	1	No	Mucho más de lo normal	16-30 min	1-10 min	11-20 min	1-10 min	No	5-6 h	5-6 h	5-6 h	0 min	2-3 h	0 min	0 min	0 min	2-3 h	A menudo	Muy a menudo	Muy a menudo	De vez en cuando	De vez en cuando	De vez en cuando	De vez en cuando	Casi nunca	De vez en cuando	Una a cuatro veces por semana	Nunca
22	Hombre	32.2831	Soltero(a)	Todos los dias	Una o dos veces a la semana	Todos los dias	Todos los dias	Todos los dias	Todos los dias	Dos a tres veces al mes	Tres a cuatro veces por semama	Todos los dias	Nunca	Nunca	Tres a cuatro veces por semama	Dos a tres veces al mes	Todos los dias	Siete días	Siete días	Siete días	3	3	No	Mucho más de lo normal	Más de 1 hora	Más de 1 h	Más de 1 h	Más de 1 h	Sí	5-6 h	5-6 h	5-6 h	30-60 min	30-60 min	0 min	0 min	3-4 h	3-4 h	De vez en cuando	Casi nunca	De vez en cuando	Muy a menudo	Muy a menudo	Casi nunca	A menudo	De vez en cuando	De vez en cuando	Todos los dias	Una a cuatro veces por semana
24	Mujer	24.4646	Soltero(a)	Todos los dias	Una o dos veces a la semana	Una vez al mes	Dos a tres veces al mes	Una vez al mes	Dos a tres veces al mes	Nunca	Una vez al mes	Todos los dias	Una o dos veces a la semana	Una o dos veces a la semana	Dos a tres veces al mes	Todos los dias	Todos los dias	Cinco días	Siete días	Siete días	3	1	Si	Más o menos igual	Más de 1 hora	0 min	21-30 min	21-30 min	Sí	5-6 h	6-7 h	0 min	3-4 h	0 min	0 min	0 min	3-4 h	0 min	A menudo	A menudo	Muy a menudo	De vez en cuando	A menudo	De vez en cuando	De vez en cuando	De vez en cuando	De vez en cuando	Todos los dias	Una a cuatro veces por semana
36	Mujer	31.245	Casado(a)	Una o dos veces a la semana	Dos a tres veces al mes	Una vez al mes	Una vez al mes	Una vez al mes	Una vez al mes	Dos a tres veces al mes	Dos a tres veces al mes	Tres a cuatro veces por semama	Tres a cuatro veces por semama	Tres a cuatro veces por semama	Una o dos veces a la semana	Una o dos veces a la semana	Tres a cuatro veces por semama	Siete días	Siete días	Siete días	3	1	No	Más o menos igual	16-30 min	21-30 min	21-30 min	21-30 min	Sí	5-6 h	6-7 h	0 min	16-30 min	3-4 h	0 min	0 min	1-2 h	0 min	De vez en cuando	De vez en cuando	A menudo	De vez en cuando	A menudo	De vez en cuando	A menudo	A menudo	Casi nunca	Una a cuatro veces por semana	Una a tres veces al mes
27	Hombre	31.2461	Soltero(a)	Dos a tres veces al mes	Nunca	Tres a cuatro veces por semama	Una vez al mes	Tres a cuatro veces por semama	Todos los dias	Una vez al mes	Nunca	Todos los dias	Todos los dias	Todos los dias	Tres a cuatro veces por semama	Una vez al mes	Todos los dias	Siete días	Siete días	Siete días	3	2	No	Mucho más de lo normal	31-60 min	Más de 1 h	Más de 1 h	Más de 1 h	Sí	5-6 h	Más de 7 h	0 min	1-15 min	16-30 min	16-30 min	1-15 min	3-4 h	3-4 h	Nunca	Nunca	Casi nunca	Muy a menudo	Muy a menudo	Casi nunca	Muy a menudo	A menudo	Casi nunca	Una a tres veces al mes	Nunca
27	Mujer	23.4952	Soltero(a)	Tres a cuatro veces por semama	Nunca	Nunca	Nunca	Nunca	Nunca	Dos a tres veces al mes	Una o dos veces a la semana	Todos los dias	Todos los dias	Una o dos veces a la semana	Dos a tres veces al mes	Una vez al mes	Dos a tres veces al mes	Un dia	Siete días	Siete días	3	2	No	Mucho más de lo normal	Más de 1 hora	1-10 min	31-60 min	21-30 min	No	5-6 h	Más de 7 h	0 min	0 min	16-30 min	0 min	0 min	0 min	1-2 h	A menudo	Casi nunca	De vez en cuando	A menudo	A menudo	Casi nunca	A menudo	A menudo	Casi nunca	Una a cuatro veces por semana	Nunca
26	Mujer	27.2392	Soltero(a)	Todos los dias	Nunca	Tres a cuatro veces por semama	Todos los dias	Todos los dias	Todos los dias	Nunca	Nunca	Todos los dias	Todos los dias	Una o dos veces a la semana	Tres a cuatro veces por semama	Una o dos veces a la semana	Todos los dias	Siete días	Siete días	Cinco días	3	2	No	Mucho más de lo normal	0 min	31-60 min	31-60 min	21-30 min	Sí	5-6 h	Más de 7 h	0 min	2-3 h	2-3 h	0 min	16-30 min	0 min	0 min	Muy a menudo	Muy a menudo	A menudo	A menudo	De vez en cuando	De vez en cuando	A menudo	De vez en cuando	De vez en cuando	Todos los dias	Nunca
31	Mujer	23.3091	Soltero(a)	Una o dos veces a la semana	Nunca	Una vez al mes	Dos a tres veces al mes	Nunca	Una vez al mes	Una vez al mes	Nunca	Todos los dias	Una o dos veces a la semana	Una vez al mes	Una vez al mes	Todos los dias	Tres a cuatro veces por semama	Siete días	Siete días	Siete días	3	0	Si	Mucho más de lo normal	0 min	11-20 min	11-20 min	11-20 min	Sí	6-7 h	1-2 h	0 min	0 min	30-60 min	0 min	0 min	1-15 min	0 min	Nunca	Nunca	De vez en cuando	De vez en cuando	A menudo	Casi nunca	A menudo	A menudo	Casi nunca	Una a cuatro veces por semana	Nunca
25	Mujer	26.8386	Soltero(a)	Dos a tres veces al mes	Nunca	Tres a cuatro veces por semama	Una vez al mes	Una o dos veces a la semana	Una o dos veces a la semana	Una vez al mes	Nunca	Todos los dias	Dos a tres veces al mes	Una vez al mes	Una vez al mes	Una o dos veces a la semana	Todos los dias	Siete días	Siete días	Siete días	3	0	Si	Un poco más de lo normal	31-60 min	31-60 min	31-60 min	31-60 min	Sí	6-7 h	1-2 h	0 min	1-15 min	2-3 h	2-3 h	1-2 h	3-4 h	0 min	De vez en cuando	Casi nunca	De vez en cuando	A menudo	A menudo	A menudo	A menudo	De vez en cuando	Casi nunca	Una a tres veces al mes	Nunca
24	Mujer	21.1927	Soltero(a)	Una vez al mes	Una vez al mes	Una vez al mes	Dos a tres veces al mes	Una o dos veces a la semana	Una vez al mes	Tres a cuatro veces por semana	Dos a tres veces al mes	Una o dos veces a la semana	Una vez al mes	Tres a cuatro veces por semama	Una o dos veces a la semana	Dos a tres veces al mes	Todos los dias	Siete días	Siete días	Dos días	2	0	No	Mucho más de lo normal	0 min	1-10 min	31-60 min	0 min	No	6-7 h	2-3 h	0 min	0 min	16-30 min	0 min	0 min	30-60 min	3-4 h	Casi nunca	Casi nunca	Casi nunca	Muy a menudo	De vez en cuando	De vez en cuando	A menudo	A menudo	Casi nunca	Una a tres veces al mes	Una a tres veces al mes
21	Mujer	24.8777	Soltero(a)	Nunca	Nunca	Dos a tres veces al mes	Dos a tres veces al mes	Una vez al mes	Una vez al mes	Una vez al mes	Una vez al mes	Todos los dias	Dos a tres veces al mes	Dos a tres veces al mes	Dos a tres veces al mes	Dos a tres veces al mes	Todos los dias	Siete días	Siete días	Siete días	5	0	Si	Un poco más de lo normal	0 min	11-20 min	31-60 min	11-20 min	Sí	6-7 h	2-3 h	0 min	1-15 min	0 min	0 min	30-60 min	30-60 min	0 min	Casi nunca	Casi nunca	A menudo	A menudo	Muy a menudo	Casi nunca	A menudo	A menudo	Casi nunca	Nunca	Nunca
26	Mujer	50.5424	Soltero(a)	Nunca	Tres a cuatro veces por semama	Una o dos veces a la semana	Dos a tres veces al mes	Una o dos veces a la semana	Una vez al mes	Una vez al mes	Nunca	Todos los dias	Una o dos veces a la semana	Todos los dias	Una o dos veces a la semana	Una o dos veces a la semana	Todos los dias	Tres dias	Siete días	Siete días	2	0	Si	Más o menos igual	31-60 min	1-10 min	21-30 min	21-30 min	No	6-7 h	2-3 h	3-4 h	30-60 min	30-60 min	0 min	0 min	2-3 h	0 min	A menudo	Casi nunca	A menudo	De vez en cuando	De vez en cuando	Casi nunca	A menudo	De vez en cuando	De vez en cuando	Nunca	Una a cuatro veces por semana
32	Mujer	32.0313	Casado(a)	Una o dos veces a la semana	Una o dos veces a la semana	Dos a tres veces al mes	Una vez al mes	Dos a tres veces al mes	Una vez al mes	Dos a tres veces al mes	Nunca	Todos los dias	Una o dos veces a la semana	Dos a tres veces al mes	Dos a tres veces al mes	Dos a tres veces al mes	Todos los dias	Cinco días	Siete días	Siete días	4	1	No	Un poco más de lo normal	0 min	31-60 min	31-60 min	31-60 min	Sí	6-7 h	3-4 h	3-4 h	0 min	2-3 h	3-4 h	0 min	30-60 min	0 min	Casi nunca	Casi nunca	De vez en cuando	A menudo	A menudo	Casi nunca	A menudo	A menudo	Casi nunca	Una a cuatro veces por semana	Una a cuatro veces por semana
21	Mujer	19.7777	Soltero(a)	Una vez al mes	Dos a tres veces al mes	Nunca	Dos a tres veces al mes	Dos a tres veces al mes	Una o dos veces a la semana	Nunca	Nunca	Dos a tres veces al mes	Nunca	Dos a tres veces al mes	Una vez al mes	Todos los dias	Todos los dias	Siete días	Siete días	Seis días	3	0	Si	Mucho más de lo normal	31-60 min	0 min	11-20 min	1-10 min	No	6-7 h	30-60 min	1-2 h	16-30 min	2-3 h	0 min	1-15 min	2-3 h	1-2 h	De vez en cuando	A menudo	De vez en cuando	Casi nunca	Casi nunca	A menudo	Casi nunca	Casi nunca	De vez en cuando	Una a tres veces al mes	Una a tres veces al mes
36	Hombre	27.3438	Soltero(a)	Una o dos veces a la semana	Nunca	Nunca	Tres a cuatro veces por semama	Nunca	Nunca	Tres a cuatro veces por semana	Nunca	Todos los dias	Dos a tres veces al mes	Tres a cuatro veces por semama	Una o dos veces a la semana	Una vez al mes	Tres a cuatro veces por semama	Tres dias	Dos días	Un dia	3	1	Si	Mucho más de lo normal	16-30 min	1-10 min	11-20 min	21-30 min	Sí	6-7 h	5-6 h	0 min	30-60 min	2-3 h	1-15 min	0 min	1-15 min	16-30 min	A menudo	A menudo	De vez en cuando	De vez en cuando	A menudo	De vez en cuando	De vez en cuando	De vez en cuando	Casi nunca	Una a cuatro veces por semana	Nunca
26	Mujer	26.9531	Soltero(a)	Tres a cuatro veces por semama	Una o dos veces a la semana	Una o dos veces a la semana	Nunca	Todos los dias	Todos los dias	Dos a tres veces al mes	Nunca	Todos los dias	Una o dos veces a la semana	Una o dos veces a la semana	Una o dos veces a la semana	Una o dos veces a la semana	Todos los dias	Cinco días	Siete días	Cuatro días	3	2	Si	Un poco más de lo normal	0 min	11-20 min	11-20 min	11-20 min	Sí	6-7 h	5-6 h	2-3 h	30-60 min	2-3 h	3-4 h	30-60 min	2-3 h	3-4 h	A menudo	A menudo	Muy a menudo	De vez en cuando	De vez en cuando	De vez en cuando	Muy a menudo	A menudo	De vez en cuando	Una a cuatro veces por semana	Una a cuatro veces por semana
24	Mujer	40.8983	Soltero(a)	Todos los dias	Nunca	Todos los dias	Todos los dias	Todos los dias	Todos los dias	Una o dos veces a la semana	Una vez al mes	Nunca	Todos los dias	Una o dos veces a la semana	Tres a cuatro veces por semama	Dos a tres veces al mes	Todos los dias	Siete días	Siete días	Siete días	3	3	No	Mucho más de lo normal	0 min	31-60 min	Más de 1 h	31-60 min	No	6-7 h	6-7 h	0 min	16-30 min	16-30 min	1-2 h	0 min	0 min	1-2 h	Muy a menudo	Muy a menudo	Muy a menudo	Casi nunca	Casi nunca	Muy a menudo	De vez en cuando	Casi nunca	Muy a menudo	Todos los dias	Nunca
23	Hombre	24.2215	Soltero(a)	Todos los dias	Nunca	Dos a tres veces al mes	Dos a tres veces al mes	Nunca	Nunca	Una vez al mes	Nunca	Tres a cuatro veces por semama	Tres a cuatro veces por semama	Tres a cuatro veces por semama	Dos a tres veces al mes	Tres a cuatro veces por semama	Todos los dias	Siete días	Siete días	Siete días	3	2	No	Mucho más de lo normal	Más de 1 hora	1-10 min	11-20 min	11-20 min	Sí	6-7 h	6-7 h	0 min	30-60 min	3-4 h	0 min	0 min	16-30 min	0 min	De vez en cuando	De vez en cuando	Muy a menudo	De vez en cuando	De vez en cuando	A menudo	De vez en cuando	Casi nunca	De vez en cuando	Todos los dias	Nunca
35	Mujer	31.5721	Soltero(a)	Todos los dias	Nunca	Una o dos veces a la semana	Todos los dias	Nunca	Nunca	Dos a tres veces al mes	Nunca	Nunca	Todos los dias	Dos a tres veces al mes	Una vez al mes	Nunca	Todos los dias	Siete días	Siete días	Siete días	3	2	Si	Mucho más de lo normal	0 min	21-30 min	21-30 min	21-30 min	No	6-7 h	6-7 h	0 min	0 min	0 min	0 min	1-2 h	30-60 min	3-4 h	Casi nunca	A menudo	A menudo	A menudo	De vez en cuando	Casi nunca	A menudo	De vez en cuando	Casi nunca	Todos los dias	Nunca
24	Mujer	32.4219	Soltero(a)	Tres a cuatro veces por semama	Una vez al mes	Una o dos veces a la semana	Una o dos veces a la semana	Tres a cuatro veces por semama	Tres a cuatro veces por semama	Dos a tres veces al mes	Dos a tres veces al mes	Tres a cuatro veces por semama	Una o dos veces a la semana	Una o dos veces a la semana	Una o dos veces a la semana	Dos a tres veces al mes	Todos los dias	Cuatro días	Siete días	Siete días	3	2	Si	Mucho más de lo normal	Más de 1 hora	11-20 min	11-20 min	11-20 min	Sí	6-7 h	6-7 h	0 min	2-3 h	1-2 h	2-3 h	2-3 h	3-4 h	16-30 min	A menudo	De vez en cuando	De vez en cuando	De vez en cuando	De vez en cuando	De vez en cuando	De vez en cuando	De vez en cuando	De vez en cuando	Una a cuatro veces por semana	Una a tres veces al mes
23	Mujer	27.5482	Soltero(a)	Tres a cuatro veces por semama	Nunca	Nunca	Nunca	Una vez al mes	Una vez al mes	Tres a cuatro veces por semana	Nunca	Todos los dias	Una o dos veces a la semana	Una o dos veces a la semana	Una o dos veces a la semana	Tres a cuatro veces por semama	Dos a tres veces al mes	Dos días	Siete días	Siete días	3	1	No	Un poco más de lo normal	31-60 min	1-10 min	Más de 1 h	31-60 min	Sí	6-7 h	6-7 h	0 min	1-15 min	3-4 h	0 min	16-30 min	16-30 min	0 min	A menudo	De vez en cuando	A menudo	A menudo	De vez en cuando	A menudo	De vez en cuando	Casi nunca	De vez en cuando	Una a cuatro veces por semana	Nunca
42	Mujer	31.4879	Soltero(a)	Una o dos veces a la semana	Una o dos veces a la semana	Nunca	Dos a tres veces al mes	Dos a tres veces al mes	Dos a tres veces al mes	Nunca	Nunca	Todos los dias	Todos los dias	Dos a tres veces al mes	Una vez al mes	Todos los dias	Tres a cuatro veces por semama	Siete días	Siete días	Siete días	3	1	Si	Mucho más de lo normal	0 min	21-30 min	21-30 min	21-30 min	Sí	6-7 h	6-7 h	0 min	2-3 h	30-60 min	0 min	0 min	2-3 h	0 min	De vez en cuando	De vez en cuando	De vez en cuando	A menudo	A menudo	De vez en cuando	A menudo	A menudo	De vez en cuando	Una a cuatro veces por semana	Una a cuatro veces por semana
25	Mujer	21.3675	Soltero(a)	Todos los dias	Nunca	Dos a tres veces al mes	Dos a tres veces al mes	Dos a tres veces al mes	Nunca	Nunca	Nunca	Todos los dias	Todos los dias	Nunca	Nunca	Nunca	Todos los dias	Siete días	Siete días	Siete días	3	2	Si	Un poco más de lo normal	31-60 min	21-30 min	21-30 min	21-30 min	Sí	6-7 h	6-7 h	0 min	30-60 min	3-4 h	0 min	0 min	0 min	0 min	De vez en cuando	De vez en cuando	A menudo	De vez en cuando	A menudo	De vez en cuando	A menudo	De vez en cuando	De vez en cuando	Todos los dias	Nunca
50	Mujer	26.5731	Casado(a)	Una o dos veces a la semana	Nunca	Nunca	Nunca	Nunca	Nunca	Una vez al mes	Nunca	Todos los dias	Dos a tres veces al mes	Una vez al mes	Nunca	Todos los dias	Todos los dias	Siete días	Siete días	Siete días	3	0	Si	Mucho más de lo normal	0 min	Más de 1 h	Más de 1 h	Más de 1 h	Sí	6-7 h	6-7 h	6-7 h	30-60 min	1-15 min	2-3 h	1-2 h	16-30 min	16-30 min	A menudo	Casi nunca	Casi nunca	Nunca	A menudo	Casi nunca	A menudo	A menudo	Nunca	Una a cuatro veces por semana	Nunca
25	Mujer	39.8586	Soltero(a)	Una o dos veces a la semana	Una o dos veces a la semana	Una o dos veces a la semana	Todos los dias	Todos los dias	Todos los dias	Nunca	Dos a tres veces al mes	Todos los dias	Una o dos veces a la semana	Tres a cuatro veces por semama	Tres a cuatro veces por semama	Una vez al mes	Todos los dias	Un dia	Siete días	Cinco días	2	1	Si	Mucho más de lo normal	Más de 1 hora	1-10 min	11-20 min	11-20 min	Sí	6-7 h	Más de 7 h	0 min	0 min	1-2 h	0 min	0 min	1-2 h	2-3 h	Muy a menudo	A menudo	A menudo	De vez en cuando	De vez en cuando	A menudo	A menudo	De vez en cuando	A menudo	Una a cuatro veces por semana	Una a cuatro veces por semana
34	Mujer	25.711	Soltero(a)	Una o dos veces a la semana	Tres a cuatro veces por semama	Una vez al mes	Una o dos veces a la semana	Dos a tres veces al mes	Una vez al mes	Una vez al mes	Nunca	Todos los dias	Dos a tres veces al mes	Dos a tres veces al mes	Una vez al mes	Nunca	Dos a tres veces al mes	Un dia	Siete días	Seis días	2	1	Si	Mucho más de lo normal	31-60 min	0 min	11-20 min	1-10 min	No	6-7 h	Más de 7 h	0 min	30-60 min	0 min	1-15 min	0 min	30-60 min	30-60 min	De vez en cuando	De vez en cuando	De vez en cuando	A menudo	A menudo	De vez en cuando	A menudo	A menudo	De vez en cuando	Una a cuatro veces por semana	Una a cuatro veces por semana
24	Mujer	34.6122	Soltero(a)	Una o dos veces a la semana	Todos los dias	Nunca	Nunca	Nunca	Nunca	Una vez al mes	Dos a tres veces al mes	Todos los dias	Dos a tres veces al mes	Dos a tres veces al mes	Una vez al mes	Una o dos veces a la semana	Tres a cuatro veces por semama	Dos días	Siete días	Cinco días	2	1	Si	Más o menos igual	0 min	0 min	31-60 min	21-30 min	Sí	6-7 h	Más de 7 h	0 min	30-60 min	0 min	0 min	0 min	30-60 min	3-4 h	Muy a menudo	Nunca	Muy a menudo	Muy a menudo	Muy a menudo	Casi nunca	Muy a menudo	De vez en cuando	Casi nunca	Una a cuatro veces por semana	Todos los dias
30	Mujer	29.2969	Casado(a)	Una o dos veces a la semana	Nunca	Dos a tres veces al mes	Una o dos veces a la semana	Todos los dias	Tres a cuatro veces por semama	Una vez al mes	Una vez al mes	Todos los dias	Tres a cuatro veces por semama	Tres a cuatro veces por semama	Dos a tres veces al mes	Tres a cuatro veces por semama	Tres a cuatro veces por semama	Siete días	Siete días	Siete días	3	2	Si	Mucho menos de lo normal	0 min	21-30 min	31-60 min	21-30 min	Sí	6-7 h	Más de 7 h	1-2 h	0 min	16-30 min	16-30 min	0 min	1-2 h	0 min	De vez en cuando	De vez en cuando	Casi nunca	A menudo	De vez en cuando	De vez en cuando	A menudo	A menudo	Casi nunca	Una a cuatro veces por semana	Nunca
22	Mujer	36.3281	Soltero(a)	Nunca	Nunca	Nunca	Una vez al mes	Una o dos veces a la semana	Tres a cuatro veces por semama	Nunca	Nunca	Dos a tres veces al mes	Dos a tres veces al mes	Una o dos veces a la semana	Una vez al mes	Todos los dias	Todos los dias	Un dia	Siete días	Siete días	2	1	No	Más o menos igual	0 min	0 min	21-30 min	31-60 min	No	Más de 7 h	0 min	0 min	16-30 min	3-4 h	3-4 h	0 min	1-15 min	0 min	A menudo	De vez en cuando	A menudo	A menudo	De vez en cuando	A menudo	A menudo	A menudo	De vez en cuando	Nunca	Nunca
66	Mujer	23.6244	Separado(a)	Una vez al mes	Nunca	Nunca	Una vez al mes	Una o dos veces a la semana	Todos los dias	Nunca	Nunca	Todos los dias	Todos los dias	Nunca	Nunca	Todos los dias	Todos los dias	Tres dias	Tres dias	Tres dias	3	0	Si	Un poco más de lo normal	16-30 min	11-20 min	11-20 min	11-20 min	No	Más de 7 h	16-30 min	0 min	1-2 h	16-30 min	0 min	0 min	0 min	1-2 h	Nunca	De vez en cuando	De vez en cuando	De vez en cuando	De vez en cuando	Nunca	A menudo	De vez en cuando	Nunca	Una a tres veces al mes	Nunca
26	Mujer	32.4557	Soltero(a)	Una o dos veces a la semana	Nunca	Dos a tres veces al mes	Una o dos veces a la semana	Una o dos veces a la semana	Una o dos veces a la semana	Dos a tres veces al mes	Nunca	Tres a cuatro veces por semama	Todos los dias	Una o dos veces a la semana	Una o dos veces a la semana	Una o dos veces a la semana	Tres a cuatro veces por semama	Siete días	Siete días	Siete días	3	1	No	Mucho más de lo normal	0 min	11-20 min	21-30 min	11-20 min	Sí	Más de 7 h	16-30 min	0 min	30-60 min	1-2 h	2-3 h	0 min	3-4 h	2-3 h	Casi nunca	De vez en cuando	De vez en cuando	A menudo	De vez en cuando	De vez en cuando	A menudo	De vez en cuando	De vez en cuando	Una a cuatro veces por semana	Nunca
34	Mujer	21.6713	Soltero(a)	Todos los dias	Una vez al mes	Una vez al mes	Todos los dias	Todos los dias	Todos los dias	Una vez al mes	Nunca	Todos los dias	Todos los dias	Tres a cuatro veces por semama	Todos los dias	Dos a tres veces al mes	Todos los dias	Siete días	Siete días	Siete días	3	2	No	Mucho más de lo normal	0 min	21-30 min	21-30 min	11-20 min	No	Más de 7 h	3-4 h	0 min	0 min	3-4 h	0 min	0 min	0 min	2-3 h	A menudo	A menudo	Muy a menudo	Casi nunca	De vez en cuando	De vez en cuando	De vez en cuando	De vez en cuando	De vez en cuando	Todos los dias	Una a tres veces al mes
56	Mujer	45.5166	Soltero(a)	Todos los dias	Nunca	Nunca	Todos los dias	Nunca	Tres a cuatro veces por semama	Dos a tres veces al mes	Nunca	Todos los dias	Dos a tres veces al mes	Tres a cuatro veces por semama	Nunca	Nunca	Todos los dias	Siete días	Siete días	Siete días	3	3	Si	Mucho más de lo normal	Más de 1 hora	11-20 min	11-20 min	11-20 min	Sí	Más de 7 h	30-60 min	0 min	3-4 h	1-2 h	0 min	30-60 min	0 min	0 min	Casi nunca	Casi nunca	Casi nunca	Muy a menudo	A menudo	Casi nunca	A menudo	A menudo	Casi nunca	Todos los dias	Nunca
18	Mujer	24.974	Soltero(a)	Nunca	Dos a tres veces al mes	Dos a tres veces al mes	Tres a cuatro veces por semama	Todos los dias	Todos los dias	Una vez al mes	Una o dos veces a la semana	Todos los dias	Dos a tres veces al mes	Dos a tres veces al mes	Dos a tres veces al mes	Nunca	Tres a cuatro veces por semama	Cuatro días	Seis días	Cinco días	3	0	No	Mucho más de lo normal	31-60 min	1-10 min	31-60 min	21-30 min	Sí	Más de 7 h	5-6 h	0 min	0 min	2-3 h	0 min	0 min	3-4 h	3-4 h	A menudo	Muy a menudo	A menudo	De vez en cuando	Casi nunca	A menudo	De vez en cuando	De vez en cuando	A menudo	Nunca	Una a tres veces al mes
35	Mujer	30.0781	Soltero(a)	Una o dos veces a la semana	Una o dos veces a la semana	Dos a tres veces al mes	Tres a cuatro veces por semama	Tres a cuatro veces por semama	Tres a cuatro veces por semama	Nunca	Nunca	Todos los dias	Todos los dias	Todos los dias	Una o dos veces a la semana	Una o dos veces a la semana	Todos los dias	Cinco días	Siete días	Cuatro días	3	1	Si	Más o menos igual	16-30 min	11-20 min	21-30 min	11-20 min	No	Más de 7 h	6-7 h	0 min	1-2 h	2-3 h	0 min	1-2 h	2-3 h	2-3 h	A menudo	De vez en cuando	De vez en cuando	De vez en cuando	De vez en cuando	De vez en cuando	De vez en cuando	De vez en cuando	De vez en cuando	Una a cuatro veces por semana	Una a cuatro veces por semana
41	Hombre	29.321	Casado(a)	Todos los dias	Dos a tres veces al mes	Una o dos veces a la semana	Tres a cuatro veces por semama	Una vez al mes	Una vez al mes	Dos a tres veces al mes	Una vez al mes	Todos los dias	Dos a tres veces al mes	Dos a tres veces al mes	Una vez al mes	Una o dos veces a la semana	Todos los dias	Tres dias	Siete días	Siete días	3	1	Si	Mucho más de lo normal	0 min	21-30 min	31-60 min	21-30 min	Sí	Más de 7 h	6-7 h	6-7 h	2-3 h	1-2 h	1-2 h	1-2 h	1-2 h	1-2 h	De vez en cuando	Casi nunca	De vez en cuando	Muy a menudo	A menudo	Casi nunca	Muy a menudo	A menudo	Casi nunca	Todos los dias	Una a tres veces al mes
35	Mujer	32.4444	Casado(a)	Todos los dias	Nunca	Todos los dias	Todos los dias	Todos los dias	Todos los dias	Una vez al mes	Nunca	Una o dos veces a la semana	Una o dos veces a la semana	Una vez al mes	Tres a cuatro veces por semama	Una o dos veces a la semana	Todos los dias	Siete días	Siete días	Siete días	3	2	Si	Un poco más de lo normal	31-60 min	21-30 min	21-30 min	21-30 min	Sí	Más de 7 h	Más de 7 h	0 min	1-15 min	2-3 h	1-2 h	0 min	1-15 min	0 min	A menudo	A menudo	A menudo	A menudo	De vez en cuando	A menudo	A menudo	De vez en cuando	De vez en cuando	Todos los dias	Nunca
28	Mujer	32.3232	Soltero(a)	Todos los dias	Una vez al mes	Una vez al mes	Dos a tres veces al mes	Una vez al mes	Dos a tres veces al mes	Tres a cuatro veces por semana	Tres a cuatro veces por semama	Todos los dias	Todos los dias	Tres a cuatro veces por semama	Dos a tres veces al mes	Tres a cuatro veces por semama	Una o dos veces a la semana	Siete días	Siete días	Siete días	3	1	No	Un poco más de lo normal	1-15 min	11-20 min	11-20 min	11-20 min	Sí	Más de 7 h	Más de 7 h	0 min	2-3 h	0 min	0 min	1-2 h	1-2 h	1-2 h	A menudo	De vez en cuando	Muy a menudo	A menudo	A menudo	De vez en cuando	De vez en cuando	Casi nunca	De vez en cuando	Todos los dias	Una a tres veces al mes
34	Mujer	34.9636	Casado(a)	Todos los dias	Nunca	Nunca	Una vez al mes	Todos los dias	Dos a tres veces al mes	Una vez al mes	Nunca	Todos los dias	Todos los dias	Dos a tres veces al mes	Una vez al mes	Dos a tres veces al mes	Todos los dias	Un dia	Un dia	Un dia	3	2	Si	Mucho más de lo normal	0 min	11-20 min	11-20 min	11-20 min	Sí	Más de 7 h	Más de 7 h	0 min	0 min	3-4 h	0 min	0 min	0 min	2-3 h	A menudo	A menudo	A menudo	De vez en cuando	De vez en cuando	De vez en cuando	De vez en cuando	De vez en cuando	De vez en cuando	Todos los dias	Nunca
32	Mujer	28.125	Soltero(a)	Todos los dias	Nunca	Dos a tres veces al mes	Todos los dias	Todos los dias	Todos los dias	Todos los dias	Nunca	Tres a cuatro veces por semama	Todos los dias	Dos a tres veces al mes	Todos los dias	Nunca	Todos los dias	Siete días	Siete días	Siete días	2	3	Si	Mucho más de lo normal	0 min	11-20 min	11-20 min	11-20 min	No	Más de 7 h	Más de 7 h	0 min	0 min	0 min	0 min	30-60 min	30-60 min	3-4 h	A menudo	De vez en cuando	Muy a menudo	De vez en cuando	A menudo	De vez en cuando	Casi nunca	De vez en cuando	De vez en cuando	Todos los dias	Nunca
19	Mujer	18.6453	Soltero(a)	Todos los dias	Nunca	Una o dos veces a la semana	Todos los dias	Una o dos veces a la semana	Todos los dias	Una o dos veces a la semana	Una vez al mes	Todos los dias	Todos los dias	Dos a tres veces al mes	Una o dos veces a la semana	Una vez al mes	Todos los dias	Siete días	Siete días	Siete días	3	2	Si	Mucho más de lo normal	31-60 min	11-20 min	21-30 min	21-30 min	No	Más de 7 h	Más de 7 h	0 min	3-4 h	30-60 min	0 min	0 min	1-15 min	0 min	A menudo	De vez en cuando	Muy a menudo	De vez en cuando	A menudo	De vez en cuando	A menudo	De vez en cuando	Nunca	Todos los dias	Nunca
39	Mujer	20.5688	Soltero(a)	Dos a tres veces al mes	Nunca	Dos a tres veces al mes	Dos a tres veces al mes	Nunca	Nunca	Nunca	Nunca	Todos los dias	Una vez al mes	Una o dos veces a la semana	Tres a cuatro veces por semama	Una o dos veces a la semana	Tres a cuatro veces por semama	Siete días	Siete días	Siete días	3	0	No	Mucho más de lo normal	16-30 min	0 min	21-30 min	31-60 min	Sí	Más de 7 h	Más de 7 h	0 min	3-4 h	0 min	0 min	0 min	3-4 h	1-2 h	De vez en cuando	De vez en cuando	De vez en cuando	A menudo	A menudo	De vez en cuando	A menudo	A menudo	De vez en cuando	Una a tres veces al mes	Nunca
24	Mujer	34.7222	Soltero(a)	Tres a cuatro veces por semama	Tres a cuatro veces por semama	Una o dos veces a la semana	Dos a tres veces al mes	Tres a cuatro veces por semama	Todos los dias	Una o dos veces a la semana	Una vez al mes	Todos los dias	Todos los dias	Tres a cuatro veces por semama	Tres a cuatro veces por semama	Una vez al mes	Tres a cuatro veces por semama	Tres dias	Siete días	Siete días	2	1	Si	Mucho más de lo normal	31-60 min	1-10 min	11-20 min	1-10 min	Sí	Más de 7 h	Más de 7 h	0 min	0 min	30-60 min	0 min	1-15 min	16-30 min	0 min	Casi nunca	De vez en cuando	A menudo	A menudo	De vez en cuando	De vez en cuando	A menudo	A menudo	De vez en cuando	Una a cuatro veces por semana	Una a cuatro veces por semana
23	Mujer	28.8889	Soltero(a)	Tres a cuatro veces por semama	Una o dos veces a la semana	Dos a tres veces al mes	Nunca	Dos a tres veces al mes	Una o dos veces a la semana	Una o dos veces a la semana	Nunca	Todos los dias	Dos a tres veces al mes	Tres a cuatro veces por semama	Tres a cuatro veces por semama	Dos a tres veces al mes	Todos los dias	Dos días	Siete días	Siete días	2	1	No	Mucho más de lo normal	Más de 1 hora	0 min	31-60 min	31-60 min	Sí	Más de 7 h	Más de 7 h	0 min	30-60 min	30-60 min	0 min	0 min	30-60 min	3-4 h	Casi nunca	De vez en cuando	De vez en cuando	Casi nunca	Muy a menudo	Casi nunca	Muy a menudo	Muy a menudo	De vez en cuando	Una a cuatro veces por semana	Una a cuatro veces por semana
20	Mujer	25.2826	Soltero(a)	Una vez al mes	Todos los dias	Una vez al mes	Dos a tres veces al mes	Una vez al mes	Una vez al mes	Nunca	Nunca	Todos los dias	Una vez al mes	Una o dos veces a la semana	Una vez al mes	Una vez al mes	Todos los dias	Un dia	Siete días	Siete días	2	0	Si	Mucho más de lo normal	31-60 min	0 min	21-30 min	21-30 min	Sí	Más de 7 h	Más de 7 h	0 min	16-30 min	1-15 min	30-60 min	16-30 min	1-2 h	0 min	Casi nunca	Casi nunca	A menudo	A menudo	A menudo	A menudo	De vez en cuando	Casi nunca	A menudo	Una a tres veces al mes	Todos los dias
27	Mujer	30.854	Soltero(a)	Tres a cuatro veces por semama	Nunca	Dos a tres veces al mes	Dos a tres veces al mes	Nunca	Dos a tres veces al mes	Nunca	Nunca	Una o dos veces a la semana	Todos los dias	Tres a cuatro veces por semama	Tres a cuatro veces por semama	Una o dos veces a la semana	Todos los dias	Siete días	Siete días	Seis días	3	2	Si	Mucho más de lo normal	0 min	21-30 min	31-60 min	11-20 min	No	Más de 7 h	Más de 7 h	0 min	1-15 min	30-60 min	1-2 h	30-60 min	2-3 h	0 min	A menudo	De vez en cuando	A menudo	De vez en cuando	A menudo	De vez en cuando	A menudo	De vez en cuando	De vez en cuando	Una a cuatro veces por semana	Nunca
23	Hombre	32.6531	Soltero(a)	Una o dos veces a la semana	Una vez al mes	Tres a cuatro veces por semama	Una o dos veces a la semana	Una o dos veces a la semana	Tres a cuatro veces por semama	Dos a tres veces al mes	Dos a tres veces al mes	Todos los dias	Tres a cuatro veces por semama	Tres a cuatro veces por semama	Tres a cuatro veces por semama	Dos a tres veces al mes	Todos los dias	Siete días	Siete días	Siete días	3	2	No	Mucho más de lo normal	31-60 min	1-10 min	1-10 min	1-10 min	Sí	Más de 7 h	Más de 7 h	1-2 h	1-15 min	30-60 min	30-60 min	30-60 min	1-2 h	3-4 h	A menudo	Casi nunca	De vez en cuando	A menudo	A menudo	De vez en cuando	A menudo	A menudo	De vez en cuando	Una a cuatro veces por semana	Una a tres veces al mes
30	Mujer	37.5	Soltero(a)	Todos los dias	Nunca	Tres a cuatro veces por semama	Tres a cuatro veces por semama	Todos los dias	Todos los dias	Una o dos veces a la semana	Dos a tres veces al mes	Nunca	Todos los dias	Todos los dias	Todos los dias	Dos a tres veces al mes	Todos los dias	Siete días	Siete días	Siete días	5	3	No	Mucho más de lo normal	0 min	Más de 1 h	Más de 1 h	Más de 1 h	Sí	Más de 7 h	Más de 7 h	1-2 h	2-3 h	2-3 h	0 min	0 min	0 min	0 min	Muy a menudo	Muy a menudo	Muy a menudo	A menudo	De vez en cuando	A menudo	De vez en cuando	De vez en cuando	Muy a menudo	Todos los dias	Nunca
21	Mujer	19.0443	Soltero(a)	Todos los dias	Nunca	Nunca	Dos a tres veces al mes	Nunca	Nunca	Una vez al mes	Una vez al mes	Todos los dias	Todos los dias	Tres a cuatro veces por semama	Una o dos veces a la semana	Una vez al mes	Nunca	Siete días	Siete días	Siete días	3	2	No	Mucho más de lo normal	31-60 min	11-20 min	21-30 min	11-20 min	No	Más de 7 h	Más de 7 h	16-30 min	0 min	1-2 h	0 min	0 min	30-60 min	3-4 h	Casi nunca	Casi nunca	A menudo	A menudo	A menudo	Casi nunca	A menudo	De vez en cuando	Casi nunca	Todos los dias	Nunca
23	Hombre	35.5114	Soltero(a)	Todos los dias	Nunca	Tres a cuatro veces por semama	Dos a tres veces al mes	Nunca	Nunca	Una vez al mes	Una vez al mes	Todos los dias	Todos los dias	Todos los dias	Todos los dias	Tres a cuatro veces por semama	Todos los dias	Siete días	Siete días	Siete días	3	2	No	Mucho más de lo normal	0 min	11-20 min	11-20 min	11-20 min	Sí	Más de 7 h	Más de 7 h	2-3 h	30-60 min	16-30 min	0 min	30-60 min	1-2 h	3-4 h	De vez en cuando	De vez en cuando	A menudo	A menudo	De vez en cuando	A menudo	A menudo	A menudo	A menudo	Todos los dias	Nunca
23	Mujer	24.3418	Soltero(a)	Todos los dias	Una o dos veces a la semana	Dos a tres veces al mes	Dos a tres veces al mes	Dos a tres veces al mes	Dos a tres veces al mes	Dos a tres veces al mes	Nunca	Todos los dias	Nunca	Dos a tres veces al mes	Dos a tres veces al mes	Una o dos veces a la semana	Todos los dias	Cuatro días	Seis días	Cuatro días	2	1	No	Mucho más de lo normal	16-30 min	21-30 min	31-60 min	21-30 min	No	Más de 7 h	Más de 7 h	Más de 7 h	0 min	30-60 min	0 min	0 min	16-30 min	0 min	Muy a menudo	Muy a menudo	Muy a menudo	De vez en cuando	De vez en cuando	A menudo	De vez en cuando	De vez en cuando	A menudo	Todos los dias	Una a cuatro veces por semana
26	Mujer	21.83	Soltero(a)	Todos los dias	Dos a tres veces al mes	Tres a cuatro veces por semama	Tres a cuatro veces por semama	Todos los dias	Tres a cuatro veces por semama	Nunca	Una vez al mes	Todos los dias	Todos los dias	Todos los dias	Dos a tres veces al mes	Tres a cuatro veces por semama	Todos los dias	Siete días	Siete días	Siete días	3	3	Si	Un poco más de lo normal	Más de 1 hora	21-30 min	21-30 min	21-30 min	Sí	Más de 7 h	Más de 7 h	Más de 7 h	0 min	16-30 min	3-4 h	1-2 h	2-3 h	1-15 min	A menudo	De vez en cuando	Muy a menudo	De vez en cuando	De vez en cuando	De vez en cuando	Casi nunca	Casi nunca	De vez en cuando	Todos los dias	Una a tres veces al mes
25	Mujer	24.974	Soltero(a)	Tres a cuatro veces por semama	Nunca	Nunca	Nunca	Una o dos veces a la semana	Una o dos veces a la semana	Una o dos veces a la semana	Nunca	Una o dos veces a la semana	Tres a cuatro veces por semama	Tres a cuatro veces por semama	Una o dos veces a la semana	Nunca	Nunca	Siete días	Siete días	Cuatro días	3	1	No	Mucho más de lo normal	Más de 1 hora	21-30 min	21-30 min	21-30 min	No	Más de 7 h	Más de 7 h	Más de 7 h	1-2 h	30-60 min	0 min	16-30 min	2-3 h	3-4 h	Casi nunca	Casi nunca	De vez en cuando	A menudo	A menudo	De vez en cuando	A menudo	A menudo	Casi nunca	Una a cuatro veces por semana	Nunca
30	Mujer	31.9576	Casado(a)	Todos los dias	Nunca	Todos los dias	Todos los dias	Todos los dias	Todos los dias	Todos los dias	Todos los dias	Una o dos veces a la semana	Todos los dias	Todos los dias	Todos los dias	Una o dos veces a la semana	Todos los dias	Seis días	Seis días	Seis días	3	3	No	Mucho más de lo normal	0 min	Más de 1 h	Más de 1 h	Más de 1 h	No	Más de 7 h	Más de 7 h	Más de 7 h	0 min	3-4 h	3-4 h	0 min	3-4 h	0 min	De vez en cuando	De vez en cuando	De vez en cuando	De vez en cuando	De vez en cuando	De vez en cuando	De vez en cuando	De vez en cuando	De vez en cuando	Todos los dias	Nunca
31	Mujer	25.5937	Soltero(a)	Todos los dias	Una vez al mes	Nunca	Nunca	Nunca	Nunca	Nunca	Nunca	Nunca	Nunca	Una vez al mes	Dos a tres veces al mes	Todos los dias	Todos los dias	Siete días	Siete días	Siete días	3	2	Si	Mucho más de lo normal	Más de 1 hora	Más de 1 h	Más de 1 h	Más de 1 h	Sí	Más de 7 h	Más de 7 h	Más de 7 h	0 min	1-15 min	0 min	0 min	3-4 h	3-4 h	De vez en cuando	Muy a menudo	De vez en cuando	Muy a menudo	A menudo	De vez en cuando	Muy a menudo	Muy a menudo	Casi nunca	Todos los dias	Una a tres veces al mes
25	Hombre	27.3588	Soltero(a)	Dos a tres veces al mes	Nunca	Una vez al mes	Una o dos veces a la semana	Todos los dias	Todos los dias	Una vez al mes	Una vez al mes	Todos los dias	Una vez al mes	Nunca	Una vez al mes	Tres a cuatro veces por semama	Nunca	Seis días	Seis días	Seis días	3	1	No	Mucho más de lo normal	31-60 min	Más de 1 h	Más de 1 h	Más de 1 h	No	Más de 7 h	Más de 7 h	Más de 7 h	16-30 min	1-2 h	3-4 h	16-30 min	30-60 min	0 min	Casi nunca	A menudo	A menudo	A menudo	De vez en cuando	Muy a menudo	Muy a menudo	Muy a menudo	Muy a menudo	Una a tres veces al mes	Nunca
25	Hombre	34.3396	Soltero(a)	Una o dos veces a la semana	Dos a tres veces al mes	Una o dos veces a la semana	Tres a cuatro veces por semama	Todos los dias	Tres a cuatro veces por semama	Una vez al mes	Nunca	Todos los dias	Dos a tres veces al mes	Una o dos veces a la semana	Dos a tres veces al mes	Tres a cuatro veces por semama	Todos los dias	Siete días	Siete días	Siete días	4	2	Si	Mucho más de lo normal	31-60 min	1-10 min	1-10 min	1-10 min	Sí	Más de 7 h	Más de 7 h	Más de 7 h	0 min	30-60 min	0 min	0 min	30-60 min	0 min	De vez en cuando	A menudo	A menudo	A menudo	A menudo	Muy a menudo	A menudo	A menudo	Casi nunca	Una a cuatro veces por semana	Una a tres veces al mes
28	Mujer	20.3125	Soltero(a)	Todos los dias	Dos a tres veces al mes	Nunca	Nunca	Nunca	Nunca	Una o dos veces a la semana	Nunca	Todos los dias	Tres a cuatro veces por semama	Una vez al mes	Todos los dias	Nunca	Nunca	Siete días	Tres dias	Un dia	1	3	No	Mucho menos de lo normal	0 min	0 min	0 min	0 min	No	0 min	0 min	0 min	0 min	0 min	0 min	0 min	0 min	0 min	Muy a menudo	Muy a menudo	Muy a menudo	Muy a menudo	Casi nunca	A menudo	A menudo	Casi nunca	Muy a menudo	Todos los dias	Una a tres veces al mes
63	Mujer	23.3091	Casado(a)	Todos los dias	Nunca	Nunca	Nunca	Nunca	Nunca	Nunca	Nunca	Todos los dias	Todos los dias	Nunca	Nunca	Una vez al mes	Nunca	Siete días	Siete días	Un dia	2	3	Si	Un poco más de lo normal	0 min	11-20 min	11-20 min	0 min	Sí	0 min	0 min	0 min	1-15 min	0 min	0 min	0 min	1-2 h	0 min	De vez en cuando	Casi nunca	De vez en cuando	Muy a menudo	Muy a menudo	Casi nunca	A menudo	A menudo	Casi nunca	Todos los dias	Nunca
39	Mujer	23.5294	Soltero(a)	Una vez al mes	Todos los dias	Una vez al mes	Nunca	Dos a tres veces al mes	Una vez al mes	Nunca	Nunca	Todos los dias	Todos los dias	Dos a tres veces al mes	Una vez al mes	Una vez al mes	Todos los dias	Cuatro días	Siete días	Siete días	2	0	Si	Un poco menos de lo normal	16-30 min	11-20 min	31-60 min	21-30 min	Sí	0 min	1-2 h	0 min	1-2 h	1-2 h	0 min	0 min	2-3 h	0 min	Muy a menudo	A menudo	A menudo	A menudo	A menudo	Muy a menudo	A menudo	A menudo	Casi nunca	Una a tres veces al mes	Todos los dias
25	Mujer	40.2647	Soltero(a)	Una vez al mes	Nunca	Nunca	Nunca	Todos los dias	Todos los dias	Dos a tres veces al mes	Dos a tres veces al mes	Todos los dias	Una vez al mes	Dos a tres veces al mes	Dos a tres veces al mes	Todos los dias	Todos los dias	Siete días	Siete días	Siete días	1	1	Si	Un poco menos de lo normal	Más de 1 hora	11-20 min	21-30 min	11-20 min	Sí	0 min	1-2 h	0 min	0 min	0 min	0 min	1-15 min	30-60 min	0 min	A menudo	A menudo	A menudo	Casi nunca	A menudo	A menudo	A menudo	Casi nunca	A menudo	Una a tres veces al mes	Nunca
27	Hombre	25.9516	Soltero(a)	Tres a cuatro veces por semama	Nunca	Dos a tres veces al mes	Una o dos veces a la semana	Una o dos veces a la semana	Dos a tres veces al mes	Nunca	Nunca	Todos los dias	Una o dos veces a la semana	Una o dos veces a la semana	Una vez al mes	Una vez al mes	Todos los dias	Siete días	Siete días	Dos días	3	1	Si	Un poco más de lo normal	16-30 min	11-20 min	21-30 min	21-30 min	Sí	0 min	1-2 h	0 min	0 min	1-2 h	0 min	1-2 h	1-2 h	0 min	De vez en cuando	De vez en cuando	De vez en cuando	A menudo	A menudo	Casi nunca	A menudo	A menudo	Casi nunca	Una a cuatro veces por semana	Nunca
61	Mujer	24.1672	Soltero(a)	Nunca	Una o dos veces a la semana	Nunca	Nunca	Nunca	Nunca	Una vez al mes	Nunca	Todos los dias	Una vez al mes	Nunca	Nunca	Todos los dias	Todos los dias	Siete días	Siete días	Siete días	3	2	No	Más o menos igual	16-30 min	11-20 min	21-30 min	31-60 min	Sí	0 min	1-2 h	0 min	1-15 min	0 min	0 min	0 min	0 min	1-15 min	De vez en cuando	Casi nunca	De vez en cuando	A menudo	A menudo	De vez en cuando	A menudo	De vez en cuando	De vez en cuando	Nunca	Una a cuatro veces por semana
29	Mujer	23.7118	Casado(a)	Dos a tres veces al mes	Tres a cuatro veces por semama	Una vez al mes	Dos a tres veces al mes	Nunca	Nunca	Una o dos veces a la semana	Nunca	Todos los dias	Una o dos veces a la semana	Todos los dias	Dos a tres veces al mes	Dos a tres veces al mes	Todos los dias	Un dia	Siete días	Un dia	1	0	Si	Un poco más de lo normal	1-15 min	0 min	21-30 min	0 min	Sí	0 min	1-2 h	0 min	2-3 h	1-2 h	0 min	0 min	0 min	0 min	De vez en cuando	De vez en cuando	A menudo	A menudo	A menudo	A menudo	A menudo	De vez en cuando	De vez en cuando	Una a tres veces al mes	Una a cuatro veces por semana
24	Mujer	28.8889	Soltero(a)	Nunca	Nunca	Una vez al mes	Una o dos veces a la semana	Nunca	Nunca	Tres a cuatro veces por semana	Una o dos veces a la semana	Todos los dias	Una vez al mes	Una o dos veces a la semana	Una vez al mes	Una vez al mes	Dos a tres veces al mes	Cuatro días	Cuatro días	Cuatro días	1	0	No	Mucho más de lo normal	0 min	21-30 min	1-10 min	11-20 min	Sí	0 min	1-2 h	2-3 h	0 min	0 min	0 min	0 min	0 min	0 min	Casi nunca	De vez en cuando	A menudo	A menudo	De vez en cuando	Casi nunca	A menudo	De vez en cuando	De vez en cuando	Nunca	Nunca
65	Mujer	24.977	Casado(a)	Nunca	Nunca	Nunca	Nunca	Nunca	Nunca	Nunca	Nunca	Todos los dias	Nunca	Una o dos veces a la semana	Una o dos veces a la semana	Nunca	Todos los dias	Dos días	Cuatro días	Un dia	2	0	No	Un poco menos de lo normal	0 min	0 min	0 min	0 min	Sí	0 min	16-30 min	0 min	0 min	16-30 min	0 min	0 min	1-15 min	0 min	Casi nunca	Nunca	Casi nunca	Muy a menudo	Nunca	De vez en cuando	Muy a menudo	A menudo	Nunca	Nunca	Nunca
52	Hombre	25.8806	Casado(a)	Una o dos veces a la semana	Nunca	Dos a tres veces al mes	Dos a tres veces al mes	Una vez al mes	Nunca	Dos a tres veces al mes	Dos a tres veces al mes	Todos los dias	Dos a tres veces al mes	Dos a tres veces al mes	Dos a tres veces al mes	Tres a cuatro veces por semama	Todos los dias	Siete días	Siete días	Dos días	2	1	No	Más o menos igual	0 min	11-20 min	21-30 min	1-10 min	Sí	0 min	16-30 min	0 min	0 min	16-30 min	0 min	1-15 min	0 min	0 min	De vez en cuando	De vez en cuando	A menudo	De vez en cuando	A menudo	De vez en cuando	De vez en cuando	De vez en cuando	A menudo	Una a cuatro veces por semana	Nunca
38	Mujer	19.0311	Separado(a)	Una vez al mes	Todos los dias	Nunca	Tres a cuatro veces por semama	Una o dos veces a la semana	Dos a tres veces al mes	Una vez al mes	Dos a tres veces al mes	Todos los dias	Una o dos veces a la semana	Nunca	Una vez al mes	Todos los dias	Todos los dias	Un dia	Siete días	Siete días	4	1	Si	Mucho menos de lo normal	0 min	1-10 min	11-20 min	21-30 min	No	0 min	16-30 min	0 min	0 min	1-15 min	1-15 min	0 min	1-15 min	1-15 min	De vez en cuando	Casi nunca	De vez en cuando	A menudo	A menudo	Casi nunca	A menudo	A menudo	De vez en cuando	Una a tres veces al mes	Todos los dias
54	Hombre	27.6888	Casado(a)	Todos los dias	Nunca	Nunca	Nunca	Nunca	Todos los dias	Tres a cuatro veces por semana	Dos a tres veces al mes	Todos los dias	Dos a tres veces al mes	Tres a cuatro veces por semama	Nunca	Una o dos veces a la semana	Tres a cuatro veces por semama	Siete días	Siete días	Siete días	1	1	No	Más o menos igual	0 min	1-10 min	1-10 min	1-10 min	Sí	0 min	16-30 min	0 min	1-15 min	1-15 min	0 min	0 min	1-15 min	1-15 min	De vez en cuando	De vez en cuando	De vez en cuando	A menudo	De vez en cuando	De vez en cuando	A menudo	A menudo	Casi nunca	Todos los dias	Nunca
29	Mujer	21.7784	Soltero(a)	Todos los dias	Una vez al mes	Dos a tres veces al mes	Una o dos veces a la semana	Dos a tres veces al mes	Una o dos veces a la semana	Dos a tres veces al mes	Dos a tres veces al mes	Todos los dias	Todos los dias	Todos los dias	Tres a cuatro veces por semama	Una o dos veces a la semana	Tres a cuatro veces por semama	Siete días	Siete días	Siete días	3	2	Si	Un poco más de lo normal	31-60 min	21-30 min	31-60 min	11-20 min	Sí	0 min	16-30 min	0 min	0 min	30-60 min	3-4 h	0 min	16-30 min	0 min	De vez en cuando	De vez en cuando	De vez en cuando	A menudo	A menudo	De vez en cuando	A menudo	De vez en cuando	Casi nunca	Todos los dias	Una a tres veces al mes
29	Hombre	25.9095	Soltero(a)	Una o dos veces a la semana	Tres a cuatro veces por semama	Dos a tres veces al mes	Una vez al mes	Nunca	Nunca	Dos a tres veces al mes	Una vez al mes	Todos los dias	Una vez al mes	Dos a tres veces al mes	Dos a tres veces al mes	Una o dos veces a la semana	Todos los dias	Dos días	Siete días	Tres dias	2	1	Si	Mucho más de lo normal	31-60 min	21-30 min	21-30 min	21-30 min	Sí	0 min	16-30 min	0 min	1-15 min	1-15 min	0 min	0 min	1-15 min	0 min	Casi nunca	De vez en cuando	Casi nunca	A menudo	A menudo	Casi nunca	A menudo	A menudo	Casi nunca	Una a cuatro veces por semana	Una a cuatro veces por semana
18	Hombre	24.968	Soltero(a)	Tres a cuatro veces por semama	Nunca	Una o dos veces a la semana	Todos los dias	Dos a tres veces al mes	Dos a tres veces al mes	Nunca	Una vez al mes	Todos los dias	Nunca	Una o dos veces a la semana	Una vez al mes	Dos a tres veces al mes	Todos los dias	Siete días	Siete días	Cinco días	3	2	Si	Un poco más de lo normal	31-60 min	1-10 min	21-30 min	21-30 min	Sí	0 min	16-30 min	0 min	1-15 min	0 min	0 min	0 min	1-15 min	1-15 min	Casi nunca	De vez en cuando	Casi nunca	A menudo	A menudo	De vez en cuando	A menudo	De vez en cuando	Casi nunca	Una a cuatro veces por semana	Nunca
24	Mujer	23.3091	Soltero(a)	Nunca	Nunca	Nunca	Nunca	Nunca	Nunca	Nunca	Nunca	Todos los dias	Una vez al mes	Nunca	Nunca	Dos a tres veces al mes	Todos los dias	Tres dias	Tres dias	Tres dias	3	3	Si	Mucho menos de lo normal	16-30 min	11-20 min	1-10 min	11-20 min	Sí	0 min	16-30 min	1-15 min	30-60 min	16-30 min	0 min	0 min	0 min	0 min	De vez en cuando	A menudo	De vez en cuando	De vez en cuando	A menudo	Casi nunca	Muy a menudo	De vez en cuando	Casi nunca	Nunca	Nunca
26	Mujer	22.9398	Casado(a)	Todos los dias	Tres a cuatro veces por semama	Nunca	Nunca	Dos a tres veces al mes	Dos a tres veces al mes	Nunca	Nunca	Todos los dias	Una o dos veces a la semana	Una o dos veces a la semana	Dos a tres veces al mes	Una vez al mes	Todos los dias	Seis días	Siete días	Siete días	3	2	Si	Mucho más de lo normal	0 min	21-30 min	31-60 min	31-60 min	Sí	0 min	2-3 h	0 min	30-60 min	30-60 min	2-3 h	0 min	2-3 h	0 min	De vez en cuando	Casi nunca	De vez en cuando	A menudo	A menudo	Casi nunca	A menudo	A menudo	Casi nunca	Todos los dias	Una a cuatro veces por semana
23	Mujer	22.0386	Soltero(a)	Una vez al mes	Tres a cuatro veces por semama	Una vez al mes	Una vez al mes	Una vez al mes	Nunca	Nunca	Nunca	Todos los dias	Una o dos veces a la semana	Una o dos veces a la semana	Una vez al mes	Dos a tres veces al mes	Tres a cuatro veces por semama	Siete días	Siete días	Siete días	3	1	Si	Un poco más de lo normal	0 min	21-30 min	31-60 min	31-60 min	Sí	0 min	2-3 h	0 min	0 min	0 min	0 min	0 min	16-30 min	0 min	De vez en cuando	Nunca	Casi nunca	De vez en cuando	A menudo	A menudo	A menudo	A menudo	Casi nunca	Una a tres veces al mes	Una a cuatro veces por semana
33	Mujer	22.8374	Casado(a)	Dos a tres veces al mes	Todos los dias	Nunca	Una vez al mes	Nunca	Nunca	Una o dos veces a la semana	Nunca	Todos los dias	Una o dos veces a la semana	Todos los dias	Una o dos veces a la semana	Una o dos veces a la semana	Todos los dias	Siete días	Siete días	Cuatro días	2	2	Si	Un poco más de lo normal	0 min	21-30 min	31-60 min	21-30 min	Sí	0 min	2-3 h	0 min	0 min	2-3 h	3-4 h	2-3 h	2-3 h	0 min	Casi nunca	Casi nunca	De vez en cuando	A menudo	A menudo	De vez en cuando	A menudo	A menudo	De vez en cuando	Una a tres veces al mes	Todos los dias
39	Mujer	25.2994	Soltero(a)	Dos a tres veces al mes	Una vez al mes	Una vez al mes	Una vez al mes	Nunca	Una vez al mes	Una vez al mes	Una vez al mes	Una o dos veces a la semana	Una o dos veces a la semana	Una vez al mes	Nunca	Una vez al mes	Todos los dias	Siete días	Siete días	Un dia	2	1	No	Más o menos igual	0 min	11-20 min	11-20 min	11-20 min	Sí	0 min	2-3 h	0 min	0 min	1-15 min	0 min	0 min	0 min	16-30 min	A menudo	Casi nunca	A menudo	A menudo	Muy a menudo	Casi nunca	Muy a menudo	A menudo	Casi nunca	Una a tres veces al mes	Una a tres veces al mes
58	Hombre	27.4648	Casado(a)	Dos a tres veces al mes	Nunca	Una vez al mes	Una o dos veces a la semana	Nunca	Nunca	Una o dos veces a la semana	Nunca	Tres a cuatro veces por semama	Tres a cuatro veces por semama	Una o dos veces a la semana	Nunca	Tres a cuatro veces por semama	Todos los dias	Cuatro días	Cuatro días	Cuatro días	3	0	No	Un poco más de lo normal	31-60 min	1-10 min	21-30 min	21-30 min	Sí	0 min	3-4 h	0 min	1-15 min	0 min	0 min	0 min	30-60 min	3-4 h	Casi nunca	Nunca	Casi nunca	Muy a menudo	Muy a menudo	Casi nunca	A menudo	A menudo	Casi nunca	Una a tres veces al mes	Nunca
24	Hombre	25.4694	Soltero(a)	Una o dos veces a la semana	Nunca	Tres a cuatro veces por semama	Tres a cuatro veces por semama	Dos a tres veces al mes	Una vez al mes	Una o dos veces a la semana	Una vez al mes	Todos los dias	Todos los dias	Todos los dias	Tres a cuatro veces por semama	Todos los dias	Todos los dias	Siete días	Siete días	Siete días	3	2	Si	Más o menos igual	16-30 min	31-60 min	21-30 min	1-10 min	Sí	0 min	3-4 h	0 min	2-3 h	0 min	0 min	0 min	30-60 min	3-4 h	De vez en cuando	De vez en cuando	A menudo	A menudo	A menudo	Nunca	A menudo	De vez en cuando	De vez en cuando	Una a cuatro veces por semana	Nunca
49	Hombre	27.0842	Casado(a)	Una o dos veces a la semana	Nunca	Nunca	Nunca	Nunca	Nunca	Una vez al mes	Una vez al mes	Una o dos veces a la semana	Dos a tres veces al mes	Dos a tres veces al mes	Dos a tres veces al mes	Dos a tres veces al mes	Todos los dias	Un dia	Un dia	Un dia	3	0	No	Mucho más de lo normal	0 min	1-10 min	1-10 min	1-10 min	Sí	0 min	3-4 h	0 min	0 min	16-30 min	0 min	0 min	0 min	0 min	De vez en cuando	Casi nunca	De vez en cuando	Muy a menudo	A menudo	De vez en cuando	A menudo	A menudo	Casi nunca	Una a cuatro veces por semana	Nunca
26	Mujer	21.0772	Soltero(a)	Todos los dias	Nunca	Dos a tres veces al mes	Tres a cuatro veces por semama	Dos a tres veces al mes	Nunca	Nunca	Nunca	Todos los dias	Una o dos veces a la semana	Una o dos veces a la semana	Dos a tres veces al mes	Dos a tres veces al mes	Todos los dias	Siete días	Siete días	Siete días	3	1	No	Mucho más de lo normal	0 min	11-20 min	31-60 min	31-60 min	Sí	0 min	3-4 h	0 min	30-60 min	0 min	0 min	16-30 min	30-60 min	3-4 h	De vez en cuando	De vez en cuando	De vez en cuando	A menudo	A menudo	Casi nunca	A menudo	De vez en cuando	Casi nunca	Todos los dias	Nunca
35	Mujer	25.0593	Soltero(a)	Todos los dias	Una vez al mes	Dos a tres veces al mes	Una o dos veces a la semana	Dos a tres veces al mes	Dos a tres veces al mes	Nunca	Una vez al mes	Todos los dias	Tres a cuatro veces por semama	Una o dos veces a la semana	Una o dos veces a la semana	Una vez al mes	Todos los dias	Siete días	Siete días	Siete días	2	2	Si	Más o menos igual	0 min	11-20 min	21-30 min	1-10 min	No	0 min	3-4 h	0 min	0 min	0 min	0 min	0 min	0 min	3-4 h	Casi nunca	De vez en cuando	De vez en cuando	De vez en cuando	De vez en cuando	De vez en cuando	A menudo	De vez en cuando	De vez en cuando	Todos los dias	Una a tres veces al mes
23	Mujer	21.4031	Soltero(a)	Todos los dias	Dos a tres veces al mes	Nunca	Dos a tres veces al mes	Nunca	Nunca	Una vez al mes	Una vez al mes	Todos los dias	Una vez al mes	Una vez al mes	Una vez al mes	Una o dos veces a la semana	Tres a cuatro veces por semama	Siete días	Siete días	Siete días	3	2	No	Más o menos igual	0 min	21-30 min	21-30 min	21-30 min	Sí	0 min	3-4 h	0 min	2-3 h	30-60 min	0 min	0 min	0 min	2-3 h	De vez en cuando	De vez en cuando	De vez en cuando	De vez en cuando	A menudo	De vez en cuando	A menudo	A menudo	De vez en cuando	Todos los dias	Una a tres veces al mes
48	Mujer	23.1206	Casado(a)	Todos los dias	Tres a cuatro veces por semama	Dos a tres veces al mes	Una o dos veces a la semana	Tres a cuatro veces por semama	Tres a cuatro veces por semama	Nunca	Nunca	Todos los dias	Tres a cuatro veces por semama	Una o dos veces a la semana	Nunca	Nunca	Todos los dias	Un dia	Siete días	Tres dias	1	1	Si	Un poco menos de lo normal	0 min	0 min	21-30 min	11-20 min	Sí	0 min	3-4 h	0 min	16-30 min	3-4 h	0 min	1-2 h	0 min	0 min	De vez en cuando	Casi nunca	De vez en cuando	Casi nunca	A menudo	Casi nunca	Casi nunca	A menudo	Casi nunca	Todos los dias	Una a cuatro veces por semana
26	Hombre	32.6059	Soltero(a)	Tres a cuatro veces por semama	Nunca	Dos a tres veces al mes	Tres a cuatro veces por semama	Una o dos veces a la semana	Una o dos veces a la semana	Una vez al mes	Dos a tres veces al mes	Todos los dias	Dos a tres veces al mes	Tres a cuatro veces por semama	Tres a cuatro veces por semama	Dos a tres veces al mes	Todos los dias	Siete días	Siete días	Siete días	3	2	No	Un poco más de lo normal	31-60 min	11-20 min	11-20 min	11-20 min	Sí	0 min	3-4 h	16-30 min	0 min	30-60 min	0 min	0 min	16-30 min	0 min	Muy a menudo	A menudo	Muy a menudo	De vez en cuando	Casi nunca	A menudo	De vez en cuando	De vez en cuando	De vez en cuando	Una a cuatro veces por semana	Nunca
42	Mujer	26.0262	Casado(a)	Una vez al mes	Nunca	Nunca	Una vez al mes	Dos a tres veces al mes	Una vez al mes	Dos a tres veces al mes	Nunca	Todos los dias	Una o dos veces a la semana	Nunca	Nunca	Nunca	Todos los dias	Siete días	Siete días	Tres dias	2	1	Si	Un poco más de lo normal	0 min	21-30 min	11-20 min	11-20 min	Sí	0 min	30-60 min	0 min	0 min	16-30 min	16-30 min	0 min	1-15 min	0 min	A menudo	A menudo	Muy a menudo	A menudo	Casi nunca	De vez en cuando	De vez en cuando	De vez en cuando	De vez en cuando	Una a tres veces al mes	Nunca
26	Mujer	22.2222	Soltero(a)	Todos los dias	Una vez al mes	Una vez al mes	Nunca	Nunca	Nunca	Nunca	Nunca	Todos los dias	Dos a tres veces al mes	Una vez al mes	Nunca	Dos a tres veces al mes	Todos los dias	Siete días	Siete días	Siete días	5	2	Si	Más o menos igual	0 min	1-10 min	0 min	0 min	Sí	0 min	30-60 min	0 min	1-2 h	3-4 h	0 min	30-60 min	3-4 h	0 min	Casi nunca	Nunca	Casi nunca	Muy a menudo	A menudo	Casi nunca	Muy a menudo	Muy a menudo	Casi nunca	Todos los dias	Una a tres veces al mes
25	Mujer	46.6754	Soltero(a)	Una o dos veces a la semana	Nunca	Una vez al mes	Una vez al mes	Dos a tres veces al mes	Tres a cuatro veces por semama	Una vez al mes	Una vez al mes	Dos a tres veces al mes	Dos a tres veces al mes	Tres a cuatro veces por semama	Dos a tres veces al mes	Dos a tres veces al mes	Tres a cuatro veces por semama	Siete días	Siete días	Dos días	2	2	Si	Un poco más de lo normal	0 min	21-30 min	21-30 min	1-10 min	No	0 min	30-60 min	0 min	0 min	16-30 min	0 min	0 min	2-3 h	0 min	Casi nunca	A menudo	De vez en cuando	Casi nunca	De vez en cuando	De vez en cuando	De vez en cuando	De vez en cuando	De vez en cuando	Una a cuatro veces por semana	Nunca
37	Mujer	40.2344	Soltero(a)	Tres a cuatro veces por semama	Dos a tres veces al mes	Una o dos veces a la semana	Una o dos veces a la semana	Todos los dias	Una o dos veces a la semana	Nunca	Una vez al mes	Todos los dias	Dos a tres veces al mes	Tres a cuatro veces por semama	Una o dos veces a la semana	Una vez al mes	Todos los dias	Cuatro días	Siete días	Dos días	2	2	No	Mucho más de lo normal	Más de 1 hora	1-10 min	Más de 1 h	31-60 min	Sí	0 min	30-60 min	0 min	1-15 min	1-2 h	0 min	0 min	0 min	3-4 h	A menudo	Casi nunca	De vez en cuando	Muy a menudo	A menudo	Casi nunca	Muy a menudo	Muy a menudo	Casi nunca	Una a cuatro veces por semana	Una a tres veces al mes
30	Mujer	18.2615	Soltero(a)	Dos a tres veces al mes	Dos a tres veces al mes	Nunca	Nunca	Nunca	Nunca	Una vez al mes	Nunca	Nunca	Nunca	Nunca	Dos a tres veces al mes	Todos los dias	Una o dos veces a la semana	Siete días	Siete días	Un dia	2	0	No	Mucho más de lo normal	Más de 1 hora	11-20 min	11-20 min	0 min	Sí	0 min	30-60 min	0 min	0 min	30-60 min	0 min	0 min	0 min	30-60 min	Casi nunca	Casi nunca	Casi nunca	A menudo	De vez en cuando	Casi nunca	De vez en cuando	De vez en cuando	Casi nunca	Una a tres veces al mes	Una a tres veces al mes
52	Mujer	25.0593	Casado(a)	Todos los dias	Nunca	Una vez al mes	Dos a tres veces al mes	Nunca	Nunca	Una o dos veces a la semana	Una vez al mes	Tres a cuatro veces por semama	Todos los dias	Tres a cuatro veces por semama	Una vez al mes	Todos los dias	Todos los dias	Tres dias	Tres dias	Tres dias	3	2	No	Mucho más de lo normal	1-15 min	11-20 min	11-20 min	11-20 min	Sí	1-15 min	0 min	0 min	30-60 min	0 min	0 min	0 min	0 min	0 min	Casi nunca	Casi nunca	Casi nunca	A menudo	A menudo	Casi nunca	A menudo	A menudo	Casi nunca	Todos los dias	Nunca
60	Mujer	23.4375	Casado(a)	Nunca	Nunca	Nunca	Nunca	Nunca	Nunca	Dos a tres veces al mes	Nunca	Todos los dias	Una o dos veces a la semana	Nunca	Nunca	Todos los dias	Nunca	Tres dias	Tres dias	Un dia	2	0	Si	Más o menos igual	16-30 min	11-20 min	11-20 min	1-10 min	Sí	1-15 min	1-15 min	0 min	0 min	0 min	0 min	0 min	0 min	0 min	Casi nunca	Casi nunca	Casi nunca	Muy a menudo	A menudo	Casi nunca	A menudo	A menudo	Casi nunca	Nunca	Nunca
43	Hombre	25.2595	Casado(a)	Todos los dias	Una vez al mes	Una vez al mes	Nunca	Nunca	Nunca	Nunca	Nunca	Todos los dias	Dos a tres veces al mes	Dos a tres veces al mes	Dos a tres veces al mes	Tres a cuatro veces por semama	Todos los dias	Siete días	Siete días	Dos días	3	1	Si	Un poco más de lo normal	1-15 min	1-10 min	1-10 min	1-10 min	Sí	1-15 min	1-15 min	0 min	16-30 min	0 min	1-15 min	0 min	1-15 min	0 min	De vez en cuando	Casi nunca	De vez en cuando	A menudo	Muy a menudo	A menudo	Muy a menudo	Casi nunca	Casi nunca	Todos los dias	Una a tres veces al mes
22	Mujer	25.8065	Soltero(a)	Todos los dias	Nunca	Todos los dias	Todos los dias	Todos los dias	Todos los dias	Una vez al mes	Nunca	Dos a tres veces al mes	Una vez al mes	Una vez al mes	Todos los dias	Todos los dias	Todos los dias	Siete días	Siete días	Siete días	3	2	No	Mucho más de lo normal	16-30 min	21-30 min	21-30 min	21-30 min	Sí	1-15 min	1-2 h	0 min	1-2 h	30-60 min	0 min	0 min	30-60 min	16-30 min	Nunca	Muy a menudo	Muy a menudo	Muy a menudo	Muy a menudo	Muy a menudo	De vez en cuando	De vez en cuando	Muy a menudo	Todos los dias	Nunca
24	Mujer	25.8065	Soltero(a)	Una o dos veces a la semana	Nunca	Dos a tres veces al mes	Nunca	Dos a tres veces al mes	Una vez al mes	Una o dos veces a la semana	Una vez al mes	Todos los dias	Una o dos veces a la semana	Dos a tres veces al mes	Una vez al mes	Dos a tres veces al mes	Una o dos veces a la semana	Siete días	Siete días	Dos días	2	0	Si	Un poco menos de lo normal	31-60 min	1-10 min	11-20 min	0 min	Sí	1-15 min	1-2 h	0 min	0 min	0 min	0 min	0 min	30-60 min	2-3 h	A menudo	De vez en cuando	A menudo	De vez en cuando	De vez en cuando	De vez en cuando	A menudo	A menudo	De vez en cuando	Una a cuatro veces por semana	Nunca
19	Mujer	23.1911	Soltero(a)	Una o dos veces a la semana	Tres a cuatro veces por semama	Una vez al mes	Una vez al mes	Dos a tres veces al mes	Una vez al mes	Nunca	Nunca	Todos los dias	Tres a cuatro veces por semama	Una o dos veces a la semana	Una o dos veces a la semana	Una vez al mes	Todos los dias	Siete días	Siete días	Un dia	2	1	Si	Más o menos igual	1-15 min	21-30 min	11-20 min	0 min	No	1-15 min	16-30 min	0 min	1-15 min	2-3 h	0 min	2-3 h	1-2 h	16-30 min	De vez en cuando	De vez en cuando	De vez en cuando	De vez en cuando	A menudo	De vez en cuando	De vez en cuando	De vez en cuando	De vez en cuando	Una a cuatro veces por semana	Una a cuatro veces por semana
30	Mujer	24.3824	Soltero(a)	Tres a cuatro veces por semama	Una o dos veces a la semana	Una vez al mes	Dos a tres veces al mes	Dos a tres veces al mes	Dos a tres veces al mes	Dos a tres veces al mes	Una vez al mes	Tres a cuatro veces por semama	Tres a cuatro veces por semama	Una o dos veces a la semana	Una o dos veces a la semana	Una vez al mes	Una o dos veces a la semana	Seis días	Seis días	Cinco días	4	3	Si	Un poco más de lo normal	16-30 min	Más de 1 h	11-20 min	21-30 min	Sí	1-15 min	16-30 min	0 min	1-15 min	1-15 min	1-15 min	1-15 min	1-15 min	1-15 min	De vez en cuando	De vez en cuando	A menudo	De vez en cuando	De vez en cuando	De vez en cuando	A menudo	De vez en cuando	De vez en cuando	Una a cuatro veces por semana	Una a cuatro veces por semana
31	Mujer	30.0781	Soltero(a)	Todos los dias	Una o dos veces a la semana	Dos a tres veces al mes	Todos los dias	Todos los dias	Todos los dias	Dos a tres veces al mes	Una vez al mes	Todos los dias	Todos los dias	Todos los dias	Todos los dias	Una o dos veces a la semana	Todos los dias	Seis días	Siete días	Siete días	3	2	Si	Mucho más de lo normal	0 min	1-10 min	11-20 min	11-20 min	Sí	1-15 min	16-30 min	0 min	0 min	0 min	0 min	1-15 min	1-15 min	1-15 min	A menudo	A menudo	Muy a menudo	De vez en cuando	A menudo	De vez en cuando	Muy a menudo	A menudo	De vez en cuando	Todos los dias	Una a cuatro veces por semana
27	Mujer	20.83	Soltero(a)	Dos a tres veces al mes	Todos los dias	Una vez al mes	Una vez al mes	Una vez al mes	Nunca	Nunca	Nunca	Todos los dias	Todos los dias	Todos los dias	Dos a tres veces al mes	Nunca	Todos los dias	Tres dias	Siete días	Siete días	2	1	No	Mucho más de lo normal	1-15 min	31-60 min	31-60 min	31-60 min	Sí	1-15 min	16-30 min	0 min	1-15 min	1-15 min	0 min	0 min	0 min	1-15 min	De vez en cuando	De vez en cuando	De vez en cuando	A menudo	A menudo	Casi nunca	A menudo	A menudo	Casi nunca	Una a tres veces al mes	Todos los dias
75	Mujer	26.0262	Separado(a)	Tres a cuatro veces por semama	Nunca	Dos a tres veces al mes	Nunca	Una vez al mes	Dos a tres veces al mes	Una vez al mes	Nunca	Una o dos veces a la semana	Una o dos veces a la semana	Nunca	Una vez al mes	Todos los dias	Tres a cuatro veces por semama	Siete días	Siete días	Cinco días	3	2	Si	Un poco más de lo normal	0 min	Más de 1 h	Más de 1 h	31-60 min	Sí	1-15 min	16-30 min	0 min	0 min	1-2 h	2-3 h	0 min	2-3 h	30-60 min	De vez en cuando	De vez en cuando	De vez en cuando	A menudo	A menudo	De vez en cuando	A menudo	A menudo	Casi nunca	Una a cuatro veces por semana	Nunca
40	Mujer	19.3962	Separado(a)	Una o dos veces a la semana	Nunca	Una o dos veces a la semana	Nunca	Nunca	Nunca	Una o dos veces a la semana	Una o dos veces a la semana	Todos los dias	Dos a tres veces al mes	Dos a tres veces al mes	Dos a tres veces al mes	Todos los dias	Todos los dias	Siete días	Siete días	Siete días	3	2	No	Mucho menos de lo normal	0 min	11-20 min	21-30 min	31-60 min	Sí	1-15 min	16-30 min	0 min	0 min	1-15 min	1-15 min	1-15 min	0 min	1-15 min	Casi nunca	De vez en cuando	A menudo	A menudo	A menudo	Casi nunca	A menudo	De vez en cuando	Nunca	Una a cuatro veces por semana	Nunca
23	Mujer	42.9752	Soltero(a)	Una o dos veces a la semana	Nunca	Una o dos veces a la semana	Dos a tres veces al mes	Todos los dias	Todos los dias	Nunca	Dos a tres veces al mes	Todos los dias	Todos los dias	Una o dos veces a la semana	Una o dos veces a la semana	Una vez al mes	Todos los dias	Siete días	Siete días	Siete días	3	3	Si	Mucho más de lo normal	0 min	11-20 min	11-20 min	11-20 min	Sí	1-15 min	16-30 min	0 min	1-15 min	1-15 min	0 min	0 min	0 min	0 min	De vez en cuando	De vez en cuando	A menudo	De vez en cuando	A menudo	De vez en cuando	A menudo	De vez en cuando	Casi nunca	Una a cuatro veces por semana	Nunca
28	Mujer	22.6563	Soltero(a)	Tres a cuatro veces por semama	Dos a tres veces al mes	Nunca	Una vez al mes	Una vez al mes	Una vez al mes	Nunca	Nunca	Todos los dias	Dos a tres veces al mes	Dos a tres veces al mes	Dos a tres veces al mes	Una vez al mes	Todos los dias	Siete días	Siete días	Siete días	3	1	Si	Un poco más de lo normal	0 min	21-30 min	21-30 min	31-60 min	Sí	1-15 min	16-30 min	0 min	1-15 min	1-15 min	0 min	0 min	1-15 min	0 min	De vez en cuando	Casi nunca	Casi nunca	Muy a menudo	Muy a menudo	Casi nunca	Muy a menudo	A menudo	Casi nunca	Una a cuatro veces por semana	Una a tres veces al mes
50	Mujer	24.6711	Soltero(a)	Todos los dias	Dos a tres veces al mes	Nunca	Una vez al mes	Nunca	Nunca	Nunca	Nunca	Tres a cuatro veces por semama	Tres a cuatro veces por semama	Una o dos veces a la semana	Una vez al mes	Todos los dias	Todos los dias	Siete días	Siete días	Cuatro días	2	2	No	Mucho más de lo normal	0 min	0 min	11-20 min	11-20 min	Sí	1-15 min	16-30 min	0 min	16-30 min	16-30 min	16-30 min	0 min	1-15 min	16-30 min	De vez en cuando	Casi nunca	De vez en cuando	A menudo	Muy a menudo	Casi nunca	A menudo	A menudo	Nunca	Todos los dias	Una a tres veces al mes
28	Mujer	22.6563	Soltero(a)	Tres a cuatro veces por semama	Dos a tres veces al mes	Una vez al mes	Nunca	Una vez al mes	Nunca	Nunca	Una vez al mes	Todos los dias	Dos a tres veces al mes	Dos a tres veces al mes	Una vez al mes	Una vez al mes	Todos los dias	Siete días	Siete días	Siete días	3	1	Si	Un poco más de lo normal	0 min	21-30 min	21-30 min	21-30 min	Sí	1-15 min	16-30 min	0 min	30-60 min	16-30 min	0 min	0 min	3-4 h	0 min	Casi nunca	Casi nunca	Casi nunca	Muy a menudo	A menudo	Muy a menudo	Muy a menudo	A menudo	Casi nunca	Una a cuatro veces por semana	Una a tres veces al mes
32	Mujer	20.5499	Soltero(a)	Dos a tres veces al mes	Una vez al mes	Nunca	Nunca	Nunca	Nunca	Nunca	Una vez al mes	Todos los dias	Una o dos veces a la semana	Una o dos veces a la semana	Nunca	Una o dos veces a la semana	Todos los dias	Siete días	Siete días	Cinco días	3	0	No	Mucho menos de lo normal	1-15 min	11-20 min	11-20 min	11-20 min	Sí	1-15 min	16-30 min	0 min	1-15 min	2-3 h	16-30 min	16-30 min	2-3 h	2-3 h	De vez en cuando	De vez en cuando	De vez en cuando	De vez en cuando	A menudo	De vez en cuando	A menudo	De vez en cuando	De vez en cuando	Una a tres veces al mes	Una a tres veces al mes
52	Mujer	25	Casado(a)	Una o dos veces a la semana	Una o dos veces a la semana	Nunca	Nunca	Una vez al mes	Una vez al mes	Nunca	Nunca	Todos los dias	Todos los dias	Una vez al mes	Una vez al mes	Una vez al mes	Todos los dias	Un dia	Siete días	Siete días	2	1	Si	Mucho menos de lo normal	1-15 min	1-10 min	31-60 min	11-20 min	Sí	1-15 min	16-30 min	0 min	0 min	1-15 min	0 min	0 min	1-15 min	1-15 min	De vez en cuando	De vez en cuando	A menudo	A menudo	De vez en cuando	De vez en cuando	De vez en cuando	A menudo	De vez en cuando	Una a cuatro veces por semana	Una a cuatro veces por semana
30	Mujer	25.3333	Soltero(a)	Tres a cuatro veces por semama	Tres a cuatro veces por semama	Una vez al mes	Tres a cuatro veces por semama	Una vez al mes	Nunca	Una vez al mes	Nunca	Todos los dias	Todos los dias	Una o dos veces a la semana	Una vez al mes	Una vez al mes	Una o dos veces a la semana	Siete días	Siete días	Siete días	3	1	Si	Mucho más de lo normal	0 min	21-30 min	31-60 min	31-60 min	Sí	1-15 min	16-30 min	0 min	1-15 min	1-15 min	0 min	1-15 min	1-15 min	0 min	De vez en cuando	De vez en cuando	De vez en cuando	De vez en cuando	De vez en cuando	De vez en cuando	De vez en cuando	De vez en cuando	De vez en cuando	Una a cuatro veces por semana	Una a cuatro veces por semana
36	Mujer	21.4844	Soltero(a)	Todos los dias	Una vez al mes	Nunca	Una vez al mes	Dos a tres veces al mes	Nunca	Una vez al mes	Nunca	Todos los dias	Todos los dias	Una o dos veces a la semana	Dos a tres veces al mes	Dos a tres veces al mes	Todos los dias	Siete días	Siete días	Siete días	3	2	Si	Más o menos igual	0 min	11-20 min	11-20 min	11-20 min	Sí	1-15 min	16-30 min	0 min	1-15 min	1-15 min	0 min	0 min	1-15 min	0 min	De vez en cuando	Casi nunca	Casi nunca	De vez en cuando	A menudo	Casi nunca	De vez en cuando	A menudo	Casi nunca	Todos los dias	Una a tres veces al mes
27	Mujer	33.2986	Soltero(a)	Todos los dias	Nunca	Nunca	Una vez al mes	Una vez al mes	Dos a tres veces al mes	Una vez al mes	Nunca	Todos los dias	Dos a tres veces al mes	Una vez al mes	Una vez al mes	Nunca	Todos los dias	Siete días	Siete días	Siete días	3	2	Si	Un poco menos de lo normal	0 min	11-20 min	11-20 min	11-20 min	Sí	1-15 min	16-30 min	0 min	1-15 min	1-15 min	1-15 min	1-15 min	1-15 min	1-15 min	Casi nunca	De vez en cuando	A menudo	A menudo	A menudo	De vez en cuando	De vez en cuando	De vez en cuando	De vez en cuando	Todos los dias	Nunca
18	Hombre	29.0612	Soltero(a)	Nunca	Nunca	Nunca	Nunca	Nunca	Nunca	Nunca	Nunca	Todos los dias	Nunca	Una o dos veces a la semana	Una vez al mes	Nunca	Todos los dias	Siete días	Siete días	Siete días	3	0	Si	Más o menos igual	16-30 min	Más de 1 h	Más de 1 h	31-60 min	Sí	1-15 min	16-30 min	0 min	16-30 min	16-30 min	0 min	0 min	3-4 h	0 min	Casi nunca	Nunca	A menudo	De vez en cuando	Casi nunca	Casi nunca	Muy a menudo	A menudo	Casi nunca	Nunca	Nunca
57	Hombre	27.5482	Casado(a)	Tres a cuatro veces por semama	Nunca	Nunca	Tres a cuatro veces por semama	Nunca	Una o dos veces a la semana	Una vez al mes	Una vez al mes	Una o dos veces a la semana	Tres a cuatro veces por semama	Nunca	Una o dos veces a la semana	Todos los dias	Todos los dias	Cinco días	Cinco días	Cinco días	3	1	Si	Un poco más de lo normal	16-30 min	21-30 min	21-30 min	21-30 min	Sí	1-15 min	16-30 min	0 min	1-15 min	0 min	0 min	0 min	0 min	1-15 min	De vez en cuando	Muy a menudo	De vez en cuando	Muy a menudo	A menudo	Casi nunca	Muy a menudo	Muy a menudo	Nunca	Una a cuatro veces por semana	Nunca
25	Mujer	23.4952	Soltero(a)	Nunca	Todos los dias	Nunca	Nunca	Nunca	Nunca	Una vez al mes	Nunca	Todos los dias	Una vez al mes	Nunca	Nunca	Nunca	Todos los dias	Siete días	Siete días	Siete días	2	0	Si	Mucho más de lo normal	16-30 min	31-60 min	21-30 min	21-30 min	Sí	1-15 min	16-30 min	0 min	1-15 min	1-15 min	0 min	0 min	1-15 min	1-15 min	De vez en cuando	Casi nunca	A menudo	De vez en cuando	A menudo	De vez en cuando	A menudo	De vez en cuando	Nunca	Nunca	Todos los dias
27	Mujer	26.8407	Casado(a)	Todos los dias	Dos a tres veces al mes	Todos los dias	Todos los dias	Tres a cuatro veces por semama	Todos los dias	Una vez al mes	Una vez al mes	Todos los dias	Dos a tres veces al mes	Dos a tres veces al mes	Una o dos veces a la semana	Una o dos veces a la semana	Todos los dias	Siete días	Siete días	Siete días	3	1	Si	Un poco menos de lo normal	1-15 min	11-20 min	21-30 min	31-60 min	No	1-15 min	16-30 min	1-15 min	0 min	1-15 min	0 min	0 min	0 min	0 min	De vez en cuando	De vez en cuando	A menudo	De vez en cuando	De vez en cuando	De vez en cuando	De vez en cuando	Casi nunca	Casi nunca	Todos los dias	Una a tres veces al mes
24	Mujer	23.8281	Soltero(a)	Una vez al mes	Todos los dias	Nunca	Nunca	Una vez al mes	Nunca	Una vez al mes	Nunca	Todos los dias	Tres a cuatro veces por semama	Nunca	Una o dos veces a la semana	Dos a tres veces al mes	Todos los dias	Dos días	Dos días	Dos días	3	0	Si	Mucho menos de lo normal	0 min	11-20 min	21-30 min	21-30 min	Sí	1-15 min	2-3 h	0 min	0 min	2-3 h	0 min	0 min	2-3 h	0 min	Casi nunca	Casi nunca	De vez en cuando	Casi nunca	Muy a menudo	Casi nunca	Muy a menudo	A menudo	Casi nunca	Una a tres veces al mes	Todos los dias
30	Mujer	21.4844	Soltero(a)	Todos los dias	Una o dos veces a la semana	Una vez al mes	Una vez al mes	Todos los dias	Una vez al mes	Una vez al mes	Una vez al mes	Una o dos veces a la semana	Todos los dias	Todos los dias	Una o dos veces a la semana	Una vez al mes	Todos los dias	Cinco días	Siete días	Siete días	3	2	Si	Mucho más de lo normal	0 min	Más de 1 h	Más de 1 h	Más de 1 h	Sí	1-15 min	2-3 h	0 min	0 min	1-15 min	0 min	0 min	1-15 min	1-15 min	De vez en cuando	De vez en cuando	De vez en cuando	A menudo	De vez en cuando	De vez en cuando	De vez en cuando	De vez en cuando	De vez en cuando	Todos los dias	Una a cuatro veces por semana
34	Mujer	21.0007	Soltero(a)	Una o dos veces a la semana	Nunca	Nunca	Dos a tres veces al mes	Nunca	Nunca	Dos a tres veces al mes	Nunca	Todos los dias	Tres a cuatro veces por semama	Una o dos veces a la semana	Una o dos veces a la semana	Una o dos veces a la semana	Todos los dias	Siete días	Siete días	Siete días	3	1	Si	Mucho más de lo normal	0 min	21-30 min	21-30 min	21-30 min	Sí	1-15 min	3-4 h	0 min	0 min	2-3 h	0 min	1-2 h	0 min	3-4 h	De vez en cuando	Casi nunca	A menudo	A menudo	De vez en cuando	De vez en cuando	A menudo	De vez en cuando	De vez en cuando	Una a cuatro veces por semana	Nunca
27	Hombre	42.5926	Soltero(a)	Todos los dias	Nunca	Una o dos veces a la semana	Nunca	Todos los dias	Todos los dias	Una o dos veces a la semana	Una vez al mes	Tres a cuatro veces por semama	Todos los dias	Todos los dias	Todos los dias	Una o dos veces a la semana	Todos los dias	Siete días	Siete días	Siete días	3	2	Si	Más o menos igual	0 min	1-10 min	31-60 min	31-60 min	No	1-15 min	3-4 h	0 min	0 min	30-60 min	1-2 h	0 min	1-2 h	0 min	Muy a menudo	Muy a menudo	Muy a menudo	Muy a menudo	De vez en cuando	De vez en cuando	De vez en cuando	Nunca	Muy a menudo	Todos los dias	Nunca
75	Hombre	28.0689	Separado(a)	Tres a cuatro veces por semama	Nunca	Nunca	Dos a tres veces al mes	Nunca	Nunca	Una o dos veces a la semana	Dos a tres veces al mes	Una o dos veces a la semana	Tres a cuatro veces por semama	Tres a cuatro veces por semama	Dos a tres veces al mes	Una o dos veces a la semana	Todos los dias	Cuatro días	Cuatro días	Tres dias	2	2	Si	Un poco más de lo normal	0 min	11-20 min	11-20 min	11-20 min	Sí	1-15 min	30-60 min	0 min	16-30 min	1-15 min	0 min	0 min	1-15 min	1-15 min	De vez en cuando	De vez en cuando	De vez en cuando	A menudo	De vez en cuando	De vez en cuando	Muy a menudo	Muy a menudo	Nunca	Una a cuatro veces por semana	Nunca
21	Hombre	20.7612	Soltero(a)	Todos los dias	Nunca	Tres a cuatro veces por semama	Tres a cuatro veces por semama	Dos a tres veces al mes	Dos a tres veces al mes	Dos a tres veces al mes	Una vez al mes	Todos los dias	Una o dos veces a la semana	Tres a cuatro veces por semama	Tres a cuatro veces por semama	Dos a tres veces al mes	Todos los dias	Tres dias	Tres dias	Tres dias	3	3	No	Un poco menos de lo normal	16-30 min	11-20 min	11-20 min	11-20 min	Sí	1-15 min	30-60 min	0 min	1-15 min	16-30 min	0 min	1-15 min	30-60 min	1-2 h	De vez en cuando	De vez en cuando	De vez en cuando	De vez en cuando	De vez en cuando	De vez en cuando	De vez en cuando	De vez en cuando	De vez en cuando	Todos los dias	Nunca
24	Mujer	25.6544	Soltero(a)	Todos los dias	Una vez al mes	Una vez al mes	Una o dos veces a la semana	Una vez al mes	Nunca	Una vez al mes	Una vez al mes	Todos los dias	Tres a cuatro veces por semama	Dos a tres veces al mes	Una vez al mes	Una vez al mes	Todos los dias	Siete días	Siete días	Siete días	3	2	No	Más o menos igual	0 min	11-20 min	21-30 min	21-30 min	Sí	1-15 min	30-60 min	0 min	16-30 min	16-30 min	0 min	1-15 min	16-30 min	0 min	De vez en cuando	De vez en cuando	A menudo	De vez en cuando	Casi nunca	De vez en cuando	Muy a menudo	A menudo	Casi nunca	Todos los dias	Una a tres veces al mes
46	Mujer	22.5069	Casado(a)	Dos a tres veces al mes	Dos a tres veces al mes	Dos a tres veces al mes	Dos a tres veces al mes	Dos a tres veces al mes	Dos a tres veces al mes	Una vez al mes	Dos a tres veces al mes	Tres a cuatro veces por semama	Dos a tres veces al mes	Dos a tres veces al mes	Una vez al mes	Tres a cuatro veces por semama	Todos los dias	Seis días	Siete días	Cuatro días	2	0	Si	Mucho más de lo normal	0 min	1-10 min	21-30 min	11-20 min	Sí	1-15 min	30-60 min	0 min	16-30 min	0 min	0 min	0 min	0 min	0 min	Casi nunca	Casi nunca	De vez en cuando	Muy a menudo	Muy a menudo	De vez en cuando	Muy a menudo	A menudo	Casi nunca	Una a tres veces al mes	Una a tres veces al mes
33	Mujer	20.4491	Soltero(a)	Dos a tres veces al mes	Una vez al mes	Nunca	Dos a tres veces al mes	Nunca	Nunca	Una vez al mes	Nunca	Todos los dias	Dos a tres veces al mes	Dos a tres veces al mes	Dos a tres veces al mes	Dos a tres veces al mes	Una o dos veces a la semana	Siete días	Siete días	Siete días	3	0	No	Mucho más de lo normal	0 min	1-10 min	31-60 min	Más de 1 h	Sí	1-15 min	30-60 min	0 min	16-30 min	30-60 min	0 min	30-60 min	1-2 h	30-60 min	De vez en cuando	De vez en cuando	A menudo	De vez en cuando	A menudo	De vez en cuando	A menudo	De vez en cuando	De vez en cuando	Una a tres veces al mes	Una a tres veces al mes
49	Mujer	32.4219	Separado(a)	Una vez al mes	Nunca	Nunca	Nunca	Una vez al mes	Nunca	Una vez al mes	Nunca	Todos los dias	Dos a tres veces al mes	Nunca	Nunca	Dos a tres veces al mes	Todos los dias	Tres dias	Tres dias	Tres dias	3	0	Si	Mucho más de lo normal	0 min	1-10 min	1-10 min	1-10 min	Sí	1-15 min	30-60 min	0 min	0 min	30-60 min	30-60 min	0 min	1-15 min	30-60 min	De vez en cuando	Casi nunca	A menudo	Muy a menudo	A menudo	De vez en cuando	Casi nunca	A menudo	De vez en cuando	Una a tres veces al mes	Nunca
39	Mujer	28.125	Casado(a)	Una o dos veces a la semana	Nunca	Nunca	Una vez al mes	Una o dos veces a la semana	Dos a tres veces al mes	Una o dos veces a la semana	Nunca	Todos los dias	Una o dos veces a la semana	Una o dos veces a la semana	Una o dos veces a la semana	Una vez al mes	Todos los dias	Siete días	Siete días	Siete días	3	0	Si	Un poco menos de lo normal	0 min	11-20 min	11-20 min	0 min	No	1-15 min	30-60 min	0 min	1-15 min	0 min	0 min	0 min	0 min	0 min	De vez en cuando	De vez en cuando	Muy a menudo	A menudo	De vez en cuando	Nunca	A menudo	A menudo	De vez en cuando	Una a cuatro veces por semana	Nunca
47	Mujer	23.4375	Separado(a)	Dos a tres veces al mes	Una vez al mes	Una vez al mes	Nunca	Nunca	Una vez al mes	Una o dos veces a la semana	Nunca	Tres a cuatro veces por semama	Una o dos veces a la semana	Dos a tres veces al mes	Una vez al mes	Una o dos veces a la semana	Todos los dias	Siete días	Siete días	Siete días	4	1	Si	Más o menos igual	1-15 min	1-10 min	0 min	1-10 min	Sí	1-2 h	0 min	0 min	30-60 min	30-60 min	0 min	16-30 min	30-60 min	0 min	De vez en cuando	Casi nunca	De vez en cuando	A menudo	De vez en cuando	Casi nunca	A menudo	A menudo	Casi nunca	Una a tres veces al mes	Una a tres veces al mes
42	Mujer	20.202	Casado(a)	Todos los dias	Nunca	Nunca	Nunca	Nunca	Nunca	Nunca	Nunca	Todos los dias	Dos a tres veces al mes	Una vez al mes	Nunca	Una o dos veces a la semana	Todos los dias	Siete días	Siete días	Siete días	3	2	Si	Mucho menos de lo normal	1-15 min	11-20 min	21-30 min	11-20 min	No	1-2 h	0 min	0 min	0 min	0 min	0 min	0 min	0 min	1-2 h	De vez en cuando	De vez en cuando	De vez en cuando	A menudo	A menudo	De vez en cuando	A menudo	De vez en cuando	De vez en cuando	Todos los dias	Nunca
57	Mujer	26.2222	Casado(a)	Una o dos veces a la semana	Una o dos veces a la semana	Nunca	Nunca	Una vez al mes	Una vez al mes	Una vez al mes	Nunca	Todos los dias	Tres a cuatro veces por semama	Dos a tres veces al mes	Dos a tres veces al mes	Tres a cuatro veces por semama	Todos los dias	Siete días	Siete días	Dos días	2	1	Si	Un poco más de lo normal	0 min	1-10 min	1-10 min	0 min	Sí	1-2 h	0 min	0 min	0 min	30-60 min	0 min	0 min	0 min	0 min	De vez en cuando	De vez en cuando	De vez en cuando	De vez en cuando	De vez en cuando	De vez en cuando	De vez en cuando	Casi nunca	De vez en cuando	Una a cuatro veces por semana	Una a cuatro veces por semana
41	Mujer	23.5102	Soltero(a)	Todos los dias	Una vez al mes	Nunca	Todos los dias	Nunca	Nunca	Dos a tres veces al mes	Una vez al mes	Tres a cuatro veces por semama	Dos a tres veces al mes	Una vez al mes	Una vez al mes	Tres a cuatro veces por semama	Una o dos veces a la semana	Siete días	Siete días	Siete días	3	2	Si	Un poco más de lo normal	31-60 min	11-20 min	21-30 min	21-30 min	Sí	1-2 h	0 min	0 min	30-60 min	1-2 h	3-4 h	30-60 min	30-60 min	30-60 min	De vez en cuando	Casi nunca	De vez en cuando	Muy a menudo	A menudo	Nunca	Muy a menudo	De vez en cuando	Casi nunca	Todos los dias	Una a tres veces al mes
49	Mujer	26.8386	Casado(a)	Una o dos veces a la semana	Nunca	Nunca	Una vez al mes	Nunca	Nunca	Una o dos veces a la semana	Nunca	Una o dos veces a la semana	Una o dos veces a la semana	Dos a tres veces al mes	Nunca	Todos los dias	Tres a cuatro veces por semama	Siete días	Siete días	Un dia	2	0	Si	Más o menos igual	1-15 min	21-30 min	31-60 min	0 min	Sí	1-2 h	0 min	30-60 min	0 min	2-3 h	0 min	0 min	16-30 min	1-15 min	De vez en cuando	Nunca	Casi nunca	Muy a menudo	Muy a menudo	Casi nunca	Muy a menudo	A menudo	Nunca	Una a cuatro veces por semana	Nunca
49	Mujer	19.9573	Casado(a)	Tres a cuatro veces por semama	Todos los dias	Dos a tres veces al mes	Nunca	Nunca	Una vez al mes	Una vez al mes	Nunca	Todos los dias	Una o dos veces a la semana	Tres a cuatro veces por semama	Una o dos veces a la semana	Dos a tres veces al mes	Tres a cuatro veces por semama	Seis días	Seis días	Siete días	3	1	Si	Mucho menos de lo normal	0 min	0 min	0 min	11-20 min	No	1-2 h	1-15 min	0 min	0 min	0 min	0 min	0 min	0 min	0 min	De vez en cuando	De vez en cuando	De vez en cuando	A menudo	A menudo	De vez en cuando	A menudo	A menudo	Casi nunca	Una a cuatro veces por semana	Todos los dias
53	Mujer	27.9421	Casado(a)	Una o dos veces a la semana	Nunca	Nunca	Nunca	Nunca	Nunca	Una vez al mes	Nunca	Todos los dias	Nunca	Nunca	Nunca	Una vez al mes	Todos los dias	Cuatro días	Cuatro días	Cuatro días	3	2	Si	Un poco menos de lo normal	0 min	0 min	0 min	21-30 min	No	1-2 h	1-15 min	0 min	30-60 min	1-2 h	0 min	30-60 min	30-60 min	30-60 min	De vez en cuando	Casi nunca	De vez en cuando	A menudo	A menudo	De vez en cuando	A menudo	De vez en cuando	De vez en cuando	Una a cuatro veces por semana	Nunca
30	Mujer	30.7004	Casado(a)	Todos los dias	Nunca	Dos a tres veces al mes	Dos a tres veces al mes	Dos a tres veces al mes	Dos a tres veces al mes	Una vez al mes	Una vez al mes	Tres a cuatro veces por semama	Dos a tres veces al mes	Dos a tres veces al mes	Una vez al mes	Dos a tres veces al mes	Dos a tres veces al mes	Siete días	Siete días	Cinco días	2	2	Si	Mucho más de lo normal	0 min	11-20 min	11-20 min	11-20 min	Sí	1-2 h	1-15 min	30-60 min	0 min	30-60 min	0 min	0 min	0 min	0 min	De vez en cuando	De vez en cuando	A menudo	A menudo	De vez en cuando	De vez en cuando	Muy a menudo	A menudo	Casi nunca	Todos los dias	Nunca
36	Mujer	28.9993	Soltero(a)	Una o dos veces a la semana	Nunca	Una vez al mes	Nunca	Nunca	Nunca	Dos a tres veces al mes	Dos a tres veces al mes	Una o dos veces a la semana	Una o dos veces a la semana	Una vez al mes	Dos a tres veces al mes	Dos a tres veces al mes	Todos los dias	Siete días	Siete días	Siete días	3	1	Si	Más o menos igual	16-30 min	1-10 min	1-10 min	1-10 min	No	1-2 h	1-2 h	0 min	0 min	1-2 h	3-4 h	0 min	3-4 h	1-15 min	De vez en cuando	De vez en cuando	Casi nunca	Muy a menudo	A menudo	Casi nunca	A menudo	A menudo	Casi nunca	Una a cuatro veces por semana	Nunca
42	Mujer	31.25	Casado(a)	Todos los dias	Nunca	Una o dos veces a la semana	Todos los dias	Todos los dias	Tres a cuatro veces por semama	Una o dos veces a la semana	Una vez al mes	Todos los dias	Todos los dias	Todos los dias	Todos los dias	Una vez al mes	Todos los dias	Cuatro días	Cuatro días	Cuatro días	3	2	Si	Mucho más de lo normal	31-60 min	11-20 min	21-30 min	21-30 min	Sí	1-2 h	1-2 h	0 min	1-2 h	0 min	0 min	0 min	0 min	0 min	De vez en cuando	Casi nunca	De vez en cuando	A menudo	A menudo	De vez en cuando	A menudo	A menudo	Casi nunca	Todos los dias	Nunca
50	Mujer	23.2335	Separado(a)	Una o dos veces a la semana	Nunca	Nunca	Una o dos veces a la semana	Nunca	Nunca	Nunca	Nunca	Todos los dias	Una vez al mes	Una o dos veces a la semana	Una vez al mes	Todos los dias	Una vez al mes	Siete días	Siete días	Seis días	3	0	Si	Un poco menos de lo normal	1-15 min	11-20 min	21-30 min	21-30 min	Sí	1-2 h	1-2 h	0 min	0 min	1-15 min	0 min	0 min	0 min	0 min	De vez en cuando	Casi nunca	De vez en cuando	De vez en cuando	A menudo	De vez en cuando	A menudo	A menudo	De vez en cuando	Una a cuatro veces por semana	Nunca
57	Mujer	26.8352	Casado(a)	Una o dos veces a la semana	Todos los dias	Nunca	Una o dos veces a la semana	Nunca	Nunca	Dos a tres veces al mes	Una vez al mes	Todos los dias	Todos los dias	Dos a tres veces al mes	Nunca	Todos los dias	Todos los dias	Tres dias	Siete días	Un dia	1	2	Si	Mucho más de lo normal	0 min	0 min	21-30 min	0 min	Sí	1-2 h	1-2 h	0 min	0 min	2-3 h	1-2 h	3-4 h	1-15 min	3-4 h	Casi nunca	Casi nunca	Casi nunca	A menudo	Muy a menudo	Casi nunca	A menudo	De vez en cuando	Casi nunca	Una a cuatro veces por semana	Todos los dias
42	Mujer	19.7055	Soltero(a)	Todos los dias	Una o dos veces a la semana	Dos a tres veces al mes	Dos a tres veces al mes	Todos los dias	Todos los dias	Una o dos veces a la semana	Nunca	Todos los dias	Todos los dias	Todos los dias	Todos los dias	Una o dos veces a la semana	Todos los dias	Un dia	Siete días	Tres dias	2	2	Si	Mucho más de lo normal	16-30 min	21-30 min	21-30 min	21-30 min	Sí	1-2 h	1-2 h	0 min	16-30 min	16-30 min	1-2 h	1-2 h	30-60 min	16-30 min	De vez en cuando	A menudo	De vez en cuando	A menudo	De vez en cuando	De vez en cuando	A menudo	Casi nunca	De vez en cuando	Todos los dias	Una a cuatro veces por semana
46	Mujer	29.2421	Soltero(a)	Dos a tres veces al mes	Tres a cuatro veces por semama	Nunca	Nunca	Nunca	Nunca	Dos a tres veces al mes	Nunca	Todos los dias	Una o dos veces a la semana	Tres a cuatro veces por semama	Una vez al mes	Todos los dias	Todos los dias	Siete días	Siete días	Siete días	3	1	No	Más o menos igual	16-30 min	21-30 min	21-30 min	21-30 min	Sí	1-2 h	1-2 h	0 min	1-2 h	1-2 h	0 min	0 min	1-2 h	0 min	Casi nunca	Casi nunca	Casi nunca	Casi nunca	Casi nunca	Casi nunca	Casi nunca	Casi nunca	Casi nunca	Una a tres veces al mes	Una a cuatro veces por semana
29	Mujer	25.1532	Soltero(a)	Todos los dias	Tres a cuatro veces por semama	Una vez al mes	Nunca	Una vez al mes	Dos a tres veces al mes	Una o dos veces a la semana	Dos a tres veces al mes	Todos los dias	Todos los dias	Todos los dias	Dos a tres veces al mes	Todos los dias	Todos los dias	Cuatro días	Siete días	Siete días	2	2	No	Mucho menos de lo normal	31-60 min	1-10 min	11-20 min	11-20 min	Sí	1-2 h	1-2 h	0 min	1-15 min	1-2 h	0 min	0 min	30-60 min	0 min	De vez en cuando	Nunca	De vez en cuando	Muy a menudo	De vez en cuando	Casi nunca	A menudo	A menudo	De vez en cuando	Todos los dias	Una a cuatro veces por semana
26	Mujer	35.3212	Casado(a)	Dos a tres veces al mes	Nunca	Una vez al mes	Nunca	Una o dos veces a la semana	Una o dos veces a la semana	Tres a cuatro veces por semana	Dos a tres veces al mes	Una o dos veces a la semana	Tres a cuatro veces por semama	Tres a cuatro veces por semama	Una o dos veces a la semana	Tres a cuatro veces por semama	Una o dos veces a la semana	Siete días	Siete días	Siete días	3	1	No	Un poco más de lo normal	0 min	31-60 min	31-60 min	31-60 min	No	1-2 h	1-2 h	0 min	0 min	1-2 h	3-4 h	0 min	3-4 h	0 min	A menudo	A menudo	A menudo	De vez en cuando	De vez en cuando	De vez en cuando	De vez en cuando	Casi nunca	De vez en cuando	Una a tres veces al mes	Nunca
68	Hombre	29.3878	Casado(a)	Una o dos veces a la semana	Nunca	Nunca	Nunca	Nunca	Nunca	Tres a cuatro veces por semana	Nunca	Tres a cuatro veces por semama	Nunca	Nunca	Una o dos veces a la semana	Tres a cuatro veces por semama	Todos los dias	Siete días	Siete días	Siete días	3	1	No	Un poco más de lo normal	31-60 min	11-20 min	21-30 min	21-30 min	Sí	1-2 h	1-2 h	0 min	16-30 min	30-60 min	0 min	1-2 h	16-30 min	0 min	De vez en cuando	De vez en cuando	De vez en cuando	Muy a menudo	Muy a menudo	Casi nunca	Muy a menudo	Muy a menudo	Casi nunca	Una a cuatro veces por semana	Nunca
45	Mujer	25.1532	Soltero(a)	Una o dos veces a la semana	Nunca	Nunca	Nunca	Nunca	Dos a tres veces al mes	Nunca	Una vez al mes	Todos los dias	Una o dos veces a la semana	Una o dos veces a la semana	Dos a tres veces al mes	Dos a tres veces al mes	Todos los dias	Tres dias	Tres dias	Tres dias	3	1	Si	Más o menos igual	0 min	11-20 min	31-60 min	11-20 min	No	1-2 h	1-2 h	0 min	30-60 min	16-30 min	1-15 min	30-60 min	30-60 min	30-60 min	A menudo	De vez en cuando	Muy a menudo	A menudo	De vez en cuando	De vez en cuando	Muy a menudo	A menudo	De vez en cuando	Una a cuatro veces por semana	Nunca
54	Mujer	21.0938	Casado(a)	Todos los dias	Nunca	Dos a tres veces al mes	Todos los dias	Dos a tres veces al mes	Dos a tres veces al mes	Una o dos veces a la semana	Una o dos veces a la semana	Todos los dias	Todos los dias	Todos los dias	Una o dos veces a la semana	Nunca	Todos los dias	Siete días	Siete días	Siete días	3	3	Si	Un poco más de lo normal	Más de 1 hora	31-60 min	31-60 min	31-60 min	Sí	1-2 h	1-2 h	0 min	0 min	30-60 min	1-15 min	1-15 min	16-30 min	1-15 min	Nunca	Nunca	De vez en cuando	A menudo	A menudo	Casi nunca	Muy a menudo	Muy a menudo	Casi nunca	Todos los dias	Nunca
32	Mujer	25	Casado(a)	Tres a cuatro veces por semama	Nunca	Dos a tres veces al mes	Nunca	Dos a tres veces al mes	Dos a tres veces al mes	Dos a tres veces al mes	Dos a tres veces al mes	Todos los dias	Todos los dias	Tres a cuatro veces por semama	Una o dos veces a la semana	Dos a tres veces al mes	Tres a cuatro veces por semama	Siete días	Siete días	Siete días	3	1	No	Un poco más de lo normal	31-60 min	11-20 min	21-30 min	21-30 min	No	1-2 h	1-2 h	0 min	30-60 min	1-2 h	0 min	16-30 min	30-60 min	0 min	De vez en cuando	Nunca	De vez en cuando	Muy a menudo	A menudo	Nunca	Muy a menudo	A menudo	Nunca	Una a cuatro veces por semana	Nunca
50	Mujer	24.5603	Separado(a)	Nunca	Nunca	Nunca	Dos a tres veces al mes	Una vez al mes	Nunca	Dos a tres veces al mes	Nunca	Tres a cuatro veces por semama	Una o dos veces a la semana	Nunca	Dos a tres veces al mes	Todos los dias	Todos los dias	Siete días	Siete días	Siete días	3	0	Si	Mucho más de lo normal	0 min	1-10 min	21-30 min	1-10 min	Sí	1-2 h	1-2 h	0 min	0 min	16-30 min	0 min	0 min	1-15 min	0 min	De vez en cuando	Casi nunca	A menudo	A menudo	De vez en cuando	De vez en cuando	A menudo	A menudo	De vez en cuando	Nunca	Nunca
21	Mujer	23.4952	Soltero(a)	Todos los dias	Una o dos veces a la semana	Dos a tres veces al mes	Una o dos veces a la semana	Dos a tres veces al mes	Una o dos veces a la semana	Una vez al mes	Nunca	Todos los dias	Tres a cuatro veces por semama	Tres a cuatro veces por semama	Una vez al mes	Nunca	Todos los dias	Cinco días	Siete días	Seis días	3	2	Si	Un poco menos de lo normal	Más de 1 hora	11-20 min	21-30 min	11-20 min	Sí	1-2 h	1-2 h	0 min	30-60 min	2-3 h	1-2 h	16-30 min	16-30 min	0 min	A menudo	De vez en cuando	A menudo	De vez en cuando	De vez en cuando	De vez en cuando	De vez en cuando	De vez en cuando	A menudo	Todos los dias	Una a cuatro veces por semana
30	Mujer	31.25	Soltero(a)	Tres a cuatro veces por semama	Una vez al mes	Una vez al mes	Una o dos veces a la semana	Una o dos veces a la semana	Una vez al mes	Tres a cuatro veces por semana	Tres a cuatro veces por semama	Nunca	Una vez al mes	Tres a cuatro veces por semama	Tres a cuatro veces por semama	Dos a tres veces al mes	Tres a cuatro veces por semama	Dos días	Siete días	Siete días	2	2	No	Más o menos igual	31-60 min	0 min	11-20 min	21-30 min	Sí	1-2 h	1-2 h	0 min	16-30 min	16-30 min	0 min	0 min	16-30 min	0 min	De vez en cuando	Nunca	De vez en cuando	A menudo	A menudo	Casi nunca	A menudo	A menudo	Casi nunca	Una a cuatro veces por semana	Una a tres veces al mes
23	Mujer	21.7865	Soltero(a)	Todos los dias	Nunca	Nunca	Una o dos veces a la semana	Tres a cuatro veces por semama	Tres a cuatro veces por semama	Una vez al mes	Una vez al mes	Todos los dias	Todos los dias	Todos los dias	Una vez al mes	Una o dos veces a la semana	Todos los dias	Siete días	Siete días	Siete días	3	2	Si	Mucho más de lo normal	0 min	11-20 min	21-30 min	21-30 min	Sí	1-2 h	1-2 h	0 min	30-60 min	30-60 min	0 min	0 min	3-4 h	30-60 min	Muy a menudo	De vez en cuando	Muy a menudo	De vez en cuando	A menudo	De vez en cuando	A menudo	De vez en cuando	De vez en cuando	Todos los dias	Nunca
45	Mujer	27.7344	Casado(a)	Una o dos veces a la semana	Nunca	Una vez al mes	Una o dos veces a la semana	Dos a tres veces al mes	Una vez al mes	Dos a tres veces al mes	Nunca	Una vez al mes	Dos a tres veces al mes	Dos a tres veces al mes	Dos a tres veces al mes	Todos los dias	Dos a tres veces al mes	Siete días	Siete días	Un dia	2	1	Si	Más o menos igual	0 min	31-60 min	31-60 min	0 min	No	1-2 h	1-2 h	0 min	30-60 min	1-15 min	0 min	30-60 min	0 min	0 min	Casi nunca	Casi nunca	De vez en cuando	A menudo	A menudo	Casi nunca	Muy a menudo	A menudo	Casi nunca	Una a cuatro veces por semana	Nunca
52	Hombre	27.2509	Casado(a)	Nunca	Nunca	Nunca	Nunca	Nunca	Nunca	Dos a tres veces al mes	Nunca	Tres a cuatro veces por semama	Dos a tres veces al mes	Dos a tres veces al mes	Nunca	Dos a tres veces al mes	Todos los dias	Siete días	Siete días	Siete días	1	0	Si	Un poco más de lo normal	0 min	31-60 min	31-60 min	31-60 min	Sí	1-2 h	1-2 h	0 min	30-60 min	1-15 min	0 min	2-3 h	30-60 min	0 min	Casi nunca	De vez en cuando	De vez en cuando	De vez en cuando	De vez en cuando	Casi nunca	A menudo	A menudo	Casi nunca	Nunca	Nunca
49	Mujer	22.4059	Casado(a)	Todos los dias	Nunca	Nunca	Nunca	Nunca	Nunca	Dos a tres veces al mes	Nunca	Tres a cuatro veces por semama	Dos a tres veces al mes	Nunca	Nunca	Todos los dias	Todos los dias	Siete días	Siete días	Siete días	2	2	Si	Más o menos igual	0 min	21-30 min	Más de 1 h	21-30 min	No	1-2 h	1-2 h	0 min	2-3 h	3-4 h	0 min	0 min	1-15 min	2-3 h	Nunca	Nunca	Nunca	Muy a menudo	Muy a menudo	Nunca	Muy a menudo	Muy a menudo	Nunca	Todos los dias	Nunca
24	Hombre	25.7117	Soltero(a)	Tres a cuatro veces por semama	Una o dos veces a la semana	Una o dos veces a la semana	Una vez al mes	Una vez al mes	Una vez al mes	Una o dos veces a la semana	Tres a cuatro veces por semama	Todos los dias	Una o dos veces a la semana	Una o dos veces a la semana	Una o dos veces a la semana	Tres a cuatro veces por semama	Tres a cuatro veces por semama	Cinco días	Siete días	Siete días	3	1	Si	Un poco más de lo normal	31-60 min	31-60 min	31-60 min	31-60 min	Sí	1-2 h	1-2 h	0 min	30-60 min	16-30 min	0 min	0 min	0 min	0 min	De vez en cuando	De vez en cuando	A menudo	Casi nunca	A menudo	Casi nunca	A menudo	De vez en cuando	Casi nunca	Una a cuatro veces por semana	Una a cuatro veces por semana
20	Mujer	25.3333	Soltero(a)	Una o dos veces a la semana	Tres a cuatro veces por semama	Dos a tres veces al mes	Tres a cuatro veces por semama	Todos los dias	Todos los dias	Nunca	Una vez al mes	Todos los dias	Dos a tres veces al mes	Nunca	Nunca	Dos a tres veces al mes	Una o dos veces a la semana	Cuatro días	Siete días	Cuatro días	1	2	No	Mucho más de lo normal	0 min	0 min	31-60 min	1-10 min	Sí	1-2 h	1-2 h	0 min	0 min	30-60 min	0 min	0 min	0 min	0 min	Casi nunca	Casi nunca	A menudo	Casi nunca	Casi nunca	Casi nunca	A menudo	De vez en cuando	Nunca	Una a cuatro veces por semana	Una a cuatro veces por semana
24	Mujer	35.1336	Soltero(a)	Todos los dias	Una vez al mes	Una vez al mes	Nunca	Dos a tres veces al mes	Una o dos veces a la semana	Una o dos veces a la semana	Dos a tres veces al mes	Una o dos veces a la semana	Una o dos veces a la semana	Una o dos veces a la semana	Dos a tres veces al mes	Dos a tres veces al mes	Todos los dias	Un dia	Un dia	Un dia	3	2	No	Mucho más de lo normal	1-15 min	0 min	Más de 1 h	31-60 min	Sí	1-2 h	1-2 h	0 min	0 min	1-2 h	30-60 min	0 min	30-60 min	0 min	A menudo	De vez en cuando	A menudo	De vez en cuando	De vez en cuando	De vez en cuando	De vez en cuando	De vez en cuando	De vez en cuando	Todos los dias	Una a tres veces al mes
33	Mujer	26.1719	Casado(a)	Una vez al mes	Nunca	Nunca	Nunca	Nunca	Nunca	Dos a tres veces al mes	Nunca	Tres a cuatro veces por semama	Dos a tres veces al mes	Nunca	Dos a tres veces al mes	Una o dos veces a la semana	Nunca	Siete días	Siete días	Siete días	3	1	Si	Más o menos igual	Más de 1 hora	1-10 min	21-30 min	21-30 min	Sí	1-2 h	1-2 h	0 min	0 min	0 min	0 min	0 min	0 min	0 min	Casi nunca	Nunca	De vez en cuando	A menudo	A menudo	Casi nunca	Muy a menudo	A menudo	Casi nunca	Una a tres veces al mes	Nunca
49	Mujer	26.3656	Casado(a)	Tres a cuatro veces por semama	Nunca	Nunca	Tres a cuatro veces por semama	Todos los dias	Tres a cuatro veces por semama	Dos a tres veces al mes	Nunca	Nunca	Dos a tres veces al mes	Una o dos veces a la semana	Dos a tres veces al mes	Una o dos veces a la semana	Tres a cuatro veces por semama	Siete días	Siete días	Siete días	3	2	Si	Más o menos igual	0 min	21-30 min	31-60 min	31-60 min	Sí	1-2 h	1-2 h	0 min	1-2 h	3-4 h	0 min	0 min	30-60 min	30-60 min	Nunca	Casi nunca	Casi nunca	Muy a menudo	A menudo	Nunca	A menudo	A menudo	Casi nunca	Una a cuatro veces por semana	Nunca
49	Mujer	22.719	Separado(a)	Nunca	Nunca	Nunca	Nunca	Nunca	Nunca	Dos a tres veces al mes	Una o dos veces a la semana	Todos los dias	Dos a tres veces al mes	Todos los dias	Nunca	Todos los dias	Todos los dias	Siete días	Siete días	Cinco días	3	0	No	Más o menos igual	1-15 min	1-10 min	21-30 min	21-30 min	No	1-2 h	1-2 h	0 min	1-15 min	2-3 h	0 min	0 min	30-60 min	3-4 h	Nunca	Casi nunca	Casi nunca	A menudo	De vez en cuando	De vez en cuando	A menudo	A menudo	De vez en cuando	Nunca	Nunca
35	Hombre	28.306	Casado(a)	Dos a tres veces al mes	Dos a tres veces al mes	Dos a tres veces al mes	Dos a tres veces al mes	Dos a tres veces al mes	Nunca	Dos a tres veces al mes	Una vez al mes	Todos los dias	Dos a tres veces al mes	Una o dos veces a la semana	Una vez al mes	Dos a tres veces al mes	Todos los dias	Cuatro días	Siete días	Siete días	2	0	No	Un poco menos de lo normal	16-30 min	31-60 min	31-60 min	31-60 min	Sí	1-2 h	1-2 h	0 min	0 min	1-15 min	3-4 h	1-2 h	30-60 min	0 min	Casi nunca	De vez en cuando	De vez en cuando	A menudo	De vez en cuando	De vez en cuando	De vez en cuando	A menudo	Casi nunca	Una a tres veces al mes	Una a tres veces al mes
72	Hombre	24.539	Casado(a)	Una o dos veces a la semana	Nunca	Nunca	Nunca	Nunca	Nunca	Una vez al mes	Nunca	Todos los dias	Una o dos veces a la semana	Nunca	Una vez al mes	Todos los dias	Todos los dias	Siete días	Siete días	Dos días	2	0	Si	Un poco más de lo normal	Más de 1 hora	21-30 min	31-60 min	21-30 min	Sí	1-2 h	1-2 h	0 min	30-60 min	16-30 min	0 min	0 min	16-30 min	1-2 h	Casi nunca	De vez en cuando	Casi nunca	A menudo	A menudo	Casi nunca	Muy a menudo	A menudo	Casi nunca	Una a cuatro veces por semana	Nunca
36	Mujer	41.0998	Soltero(a)	Nunca	Nunca	Una vez al mes	Tres a cuatro veces por semama	Una vez al mes	Nunca	Dos a tres veces al mes	Nunca	Tres a cuatro veces por semama	Todos los dias	Una o dos veces a la semana	Nunca	Tres a cuatro veces por semama	Todos los dias	Siete días	Siete días	Siete días	1	0	Si	Un poco más de lo normal	0 min	11-20 min	31-60 min	11-20 min	Sí	1-2 h	1-2 h	0 min	16-30 min	0 min	0 min	16-30 min	0 min	0 min	Nunca	Nunca	De vez en cuando	A menudo	De vez en cuando	Casi nunca	A menudo	De vez en cuando	Casi nunca	Nunca	Nunca
26	Mujer	24.8777	Soltero(a)	Tres a cuatro veces por semama	Nunca	Dos a tres veces al mes	Todos los dias	Nunca	Todos los dias	Dos a tres veces al mes	Nunca	Una vez al mes	Todos los dias	Dos a tres veces al mes	Una o dos veces a la semana	Una vez al mes	Todos los dias	Siete días	Siete días	Siete días	3	2	No	Un poco más de lo normal	0 min	11-20 min	21-30 min	11-20 min	Sí	1-2 h	1-2 h	0 min	0 min	1-2 h	0 min	0 min	30-60 min	0 min	De vez en cuando	Casi nunca	Muy a menudo	De vez en cuando	De vez en cuando	De vez en cuando	A menudo	A menudo	De vez en cuando	Una a cuatro veces por semana	Nunca
28	Mujer	33.0578	Casado(a)	Tres a cuatro veces por semama	Dos a tres veces al mes	Tres a cuatro veces por semama	Una o dos veces a la semana	Todos los dias	Todos los dias	Una o dos veces a la semana	Nunca	Tres a cuatro veces por semama	Dos a tres veces al mes	Una o dos veces a la semana	Tres a cuatro veces por semama	Tres a cuatro veces por semama	Todos los dias	Siete días	Siete días	Siete días	3	2	No	Mucho más de lo normal	0 min	21-30 min	31-60 min	21-30 min	No	1-2 h	1-2 h	0 min	30-60 min	1-2 h	3-4 h	0 min	0 min	0 min	A menudo	A menudo	A menudo	De vez en cuando	Casi nunca	A menudo	Casi nunca	Casi nunca	Muy a menudo	Una a cuatro veces por semana	Una a tres veces al mes
25	Mujer	35.0032	Casado(a)	Todos los dias	Dos a tres veces al mes	Tres a cuatro veces por semama	Una o dos veces a la semana	Tres a cuatro veces por semama	Todos los dias	Una o dos veces a la semana	Nunca	Tres a cuatro veces por semama	Una o dos veces a la semana	Tres a cuatro veces por semama	Tres a cuatro veces por semama	Tres a cuatro veces por semama	Tres a cuatro veces por semama	Cinco días	Siete días	Seis días	3	2	No	Más o menos igual	0 min	11-20 min	21-30 min	11-20 min	Sí	1-2 h	1-2 h	0 min	1-15 min	0 min	0 min	16-30 min	30-60 min	0 min	De vez en cuando	Casi nunca	A menudo	De vez en cuando	A menudo	De vez en cuando	A menudo	De vez en cuando	De vez en cuando	Todos los dias	Una a tres veces al mes
38	Mujer	39.8961	Soltero(a)	Todos los dias	Una vez al mes	Una o dos veces a la semana	Una o dos veces a la semana	Dos a tres veces al mes	Dos a tres veces al mes	Dos a tres veces al mes	Nunca	Tres a cuatro veces por semama	Una o dos veces a la semana	Una o dos veces a la semana	Dos a tres veces al mes	Una vez al mes	Todos los dias	Siete días	Siete días	Cuatro días	3	1	Si	Mucho más de lo normal	0 min	21-30 min	31-60 min	21-30 min	Sí	1-2 h	1-2 h	0 min	0 min	16-30 min	0 min	16-30 min	30-60 min	16-30 min	De vez en cuando	De vez en cuando	A menudo	A menudo	A menudo	Casi nunca	A menudo	A menudo	Nunca	Todos los dias	Una a tres veces al mes
38	Mujer	37.2536	Separado(a)	Tres a cuatro veces por semama	Nunca	Una vez al mes	Dos a tres veces al mes	Tres a cuatro veces por semama	Todos los dias	Una vez al mes	Nunca	Todos los dias	Todos los dias	Dos a tres veces al mes	Una vez al mes	Una o dos veces a la semana	Una o dos veces a la semana	Siete días	Siete días	Cuatro días	2	2	Si	Más o menos igual	0 min	1-10 min	1-10 min	1-10 min	Sí	1-2 h	1-2 h	1-15 min	1-15 min	16-30 min	0 min	16-30 min	1-15 min	1-15 min	De vez en cuando	A menudo	A menudo	De vez en cuando	De vez en cuando	De vez en cuando	De vez en cuando	De vez en cuando	De vez en cuando	Una a cuatro veces por semana	Nunca
31	Mujer	35.6099	Casado(a)	Nunca	Una vez al mes	Todos los dias	Todos los dias	Todos los dias	Todos los dias	Tres a cuatro veces por semana	Una o dos veces a la semana	Una o dos veces a la semana	Todos los dias	Todos los dias	Todos los dias	Una vez al mes	Todos los dias	Siete días	Siete días	Siete días	5	1	No	Mucho más de lo normal	Más de 1 hora	1-10 min	1-10 min	1-10 min	Sí	1-2 h	1-2 h	1-2 h	1-15 min	1-15 min	16-30 min	0 min	0 min	0 min	A menudo	De vez en cuando	A menudo	De vez en cuando	Casi nunca	De vez en cuando	De vez en cuando	De vez en cuando	De vez en cuando	Nunca	Una a tres veces al mes
26	Mujer	28.2284	Soltero(a)	Una o dos veces a la semana	Nunca	Dos a tres veces al mes	Dos a tres veces al mes	Una vez al mes	Una o dos veces a la semana	Dos a tres veces al mes	Una vez al mes	Todos los dias	Tres a cuatro veces por semama	Una o dos veces a la semana	Una o dos veces a la semana	Dos a tres veces al mes	Todos los dias	Cinco días	Siete días	Cinco días	1	2	Si	Mucho más de lo normal	Más de 1 hora	1-10 min	11-20 min	1-10 min	Sí	1-2 h	1-2 h	2-3 h	0 min	1-2 h	0 min	0 min	0 min	0 min	Muy a menudo	De vez en cuando	A menudo	A menudo	A menudo	De vez en cuando	Muy a menudo	A menudo	De vez en cuando	Una a cuatro veces por semana	Nunca
26	Mujer	27.6888	Soltero(a)	Todos los dias	Nunca	Una vez al mes	Dos a tres veces al mes	Una vez al mes	Una vez al mes	Tres a cuatro veces por semana	Dos a tres veces al mes	Todos los dias	Tres a cuatro veces por semama	Una vez al mes	Una vez al mes	Dos a tres veces al mes	Tres a cuatro veces por semama	Siete días	Siete días	Siete días	2	3	Si	Mucho más de lo normal	0 min	Más de 1 h	Más de 1 h	Más de 1 h	Sí	1-2 h	1-2 h	30-60 min	16-30 min	1-15 min	0 min	0 min	30-60 min	0 min	De vez en cuando	De vez en cuando	A menudo	De vez en cuando	A menudo	Casi nunca	A menudo	A menudo	Casi nunca	Todos los dias	Nunca
37	Mujer	31.6443	Casado(a)	Tres a cuatro veces por semama	Nunca	Nunca	Tres a cuatro veces por semama	Tres a cuatro veces por semama	Tres a cuatro veces por semama	Una o dos veces a la semana	Nunca	Todos los dias	Dos a tres veces al mes	Tres a cuatro veces por semama	Una o dos veces a la semana	Una o dos veces a la semana	Tres a cuatro veces por semama	Siete días	Siete días	Siete días	3	2	No	Más o menos igual	16-30 min	1-10 min	1-10 min	1-10 min	No	1-2 h	16-30 min	0 min	0 min	16-30 min	16-30 min	0 min	0 min	0 min	De vez en cuando	A menudo	Casi nunca	A menudo	A menudo	De vez en cuando	A menudo	A menudo	Casi nunca	Una a cuatro veces por semana	Nunca
53	Hombre	28.3447	Casado(a)	Todos los dias	Nunca	Una o dos veces a la semana	Todos los dias	Todos los dias	Todos los dias	Dos a tres veces al mes	Una vez al mes	Todos los dias	Todos los dias	Tres a cuatro veces por semama	Una o dos veces a la semana	Dos a tres veces al mes	Todos los dias	Siete días	Siete días	Tres dias	3	1	Si	Mucho menos de lo normal	0 min	1-10 min	11-20 min	1-10 min	Sí	1-2 h	16-30 min	0 min	0 min	1-15 min	0 min	0 min	16-30 min	0 min	De vez en cuando	De vez en cuando	Muy a menudo	Muy a menudo	A menudo	De vez en cuando	Muy a menudo	A menudo	Casi nunca	Todos los dias	Nunca
33	Hombre	26.5759	Casado(a)	Una vez al mes	Tres a cuatro veces por semama	Nunca	Una o dos veces a la semana	Nunca	Dos a tres veces al mes	Una o dos veces a la semana	Nunca	Todos los dias	Dos a tres veces al mes	Dos a tres veces al mes	Dos a tres veces al mes	Una vez al mes	Todos los dias	Dos días	Siete días	Cinco días	2	0	Si	Más o menos igual	0 min	0 min	21-30 min	11-20 min	Sí	1-2 h	16-30 min	0 min	16-30 min	3-4 h	3-4 h	16-30 min	16-30 min	0 min	De vez en cuando	Nunca	Casi nunca	Muy a menudo	Muy a menudo	Nunca	Muy a menudo	Muy a menudo	Nunca	Una a tres veces al mes	Una a cuatro veces por semana
36	Hombre	27.4348	Soltero(a)	Una vez al mes	Una vez al mes	Nunca	Nunca	Nunca	Nunca	Dos a tres veces al mes	Dos a tres veces al mes	Todos los dias	Dos a tres veces al mes	Una vez al mes	Tres a cuatro veces por semama	Una vez al mes	Todos los dias	Cuatro días	Dos días	Cuatro días	3	0	No	Mucho menos de lo normal	1-15 min	11-20 min	1-10 min	21-30 min	No	1-2 h	16-30 min	1-15 min	1-15 min	30-60 min	0 min	0 min	30-60 min	0 min	De vez en cuando	Casi nunca	De vez en cuando	Muy a menudo	A menudo	Casi nunca	Muy a menudo	Muy a menudo	De vez en cuando	Una a tres veces al mes	Una a tres veces al mes
49	Mujer	23.7954	Soltero(a)	Todos los dias	Nunca	Dos a tres veces al mes	Una vez al mes	Nunca	Nunca	Nunca	Nunca	Una vez al mes	Dos a tres veces al mes	Dos a tres veces al mes	Una vez al mes	Todos los dias	Todos los dias	Siete días	Siete días	Siete días	1	1	No	Un poco más de lo normal	0 min	11-20 min	21-30 min	21-30 min	No	1-2 h	16-30 min	16-30 min	30-60 min	30-60 min	0 min	30-60 min	0 min	0 min	Casi nunca	Casi nunca	De vez en cuando	Muy a menudo	Muy a menudo	Casi nunca	Muy a menudo	A menudo	Nunca	Todos los dias	Nunca
41	Hombre	24.6097	Casado(a)	Tres a cuatro veces por semama	Nunca	Nunca	Dos a tres veces al mes	Nunca	Nunca	Dos a tres veces al mes	Nunca	Todos los dias	Una vez al mes	Una o dos veces a la semana	Dos a tres veces al mes	Dos a tres veces al mes	Dos a tres veces al mes	Siete días	Siete días	Tres dias	3	1	Si	Un poco más de lo normal	0 min	1-10 min	11-20 min	1-10 min	Sí	1-2 h	16-30 min	30-60 min	30-60 min	0 min	0 min	0 min	0 min	0 min	Casi nunca	Casi nunca	Casi nunca	Muy a menudo	A menudo	Casi nunca	A menudo	A menudo	Nunca	Una a cuatro veces por semana	Nunca
53	Mujer	29.9688	Soltero(a)	Dos a tres veces al mes	Una vez al mes	Nunca	Nunca	Dos a tres veces al mes	Una vez al mes	Dos a tres veces al mes	Dos a tres veces al mes	Todos los dias	Tres a cuatro veces por semama	Tres a cuatro veces por semama	Una vez al mes	Todos los dias	Todos los dias	Siete días	Siete días	Siete días	2	0	Si	Más o menos igual	1-15 min	11-20 min	21-30 min	11-20 min	Sí	1-2 h	2-3 h	0 min	30-60 min	1-2 h	0 min	1-2 h	0 min	1-2 h	De vez en cuando	Casi nunca	De vez en cuando	A menudo	A menudo	De vez en cuando	A menudo	De vez en cuando	Casi nunca	Una a tres veces al mes	Una a tres veces al mes
34	Mujer	23.8751	Soltero(a)	Tres a cuatro veces por semama	Una vez al mes	Una vez al mes	Una vez al mes	Una vez al mes	Una vez al mes	Dos a tres veces al mes	Nunca	Todos los dias	Una o dos veces a la semana	Dos a tres veces al mes	Dos a tres veces al mes	Dos a tres veces al mes	Tres a cuatro veces por semama	Siete días	Siete días	Seis días	3	2	No	Mucho más de lo normal	31-60 min	21-30 min	31-60 min	21-30 min	Sí	1-2 h	2-3 h	0 min	30-60 min	1-2 h	3-4 h	1-2 h	3-4 h	3-4 h	De vez en cuando	De vez en cuando	De vez en cuando	A menudo	A menudo	De vez en cuando	A menudo	A menudo	De vez en cuando	Una a cuatro veces por semana	Una a tres veces al mes
25	Mujer	22.4323	Soltero(a)	Todos los dias	Una vez al mes	Nunca	Nunca	Todos los dias	Nunca	Nunca	Nunca	Todos los dias	Dos a tres veces al mes	Dos a tres veces al mes	Una vez al mes	Dos a tres veces al mes	Dos a tres veces al mes	Siete días	Siete días	Cinco días	2	2	Si	Mucho más de lo normal	0 min	Más de 1 h	Más de 1 h	0 min	Sí	1-2 h	2-3 h	0 min	1-15 min	1-2 h	3-4 h	0 min	3-4 h	2-3 h	Nunca	A menudo	A menudo	Casi nunca	Casi nunca	Muy a menudo	Casi nunca	Casi nunca	Casi nunca	Todos los dias	Una a tres veces al mes
32	Mujer	25.711	Soltero(a)	Dos a tres veces al mes	Dos a tres veces al mes	Nunca	Nunca	Todos los dias	Todos los dias	Dos a tres veces al mes	Una vez al mes	Una vez al mes	Todos los dias	Dos a tres veces al mes	Una o dos veces a la semana	Dos a tres veces al mes	Una o dos veces a la semana	Tres dias	Siete días	Cinco días	3	1	Si	Un poco más de lo normal	1-15 min	11-20 min	21-30 min	11-20 min	Sí	1-2 h	2-3 h	0 min	1-15 min	1-2 h	1-2 h	0 min	0 min	0 min	De vez en cuando	De vez en cuando	A menudo	De vez en cuando	De vez en cuando	De vez en cuando	De vez en cuando	De vez en cuando	A menudo	Una a tres veces al mes	Una a tres veces al mes
38	Hombre	24.6548	Casado(a)	Nunca	Nunca	Una o dos veces a la semana	Una vez al mes	Dos a tres veces al mes	Nunca	Nunca	Nunca	Todos los dias	Una vez al mes	Una vez al mes	Una vez al mes	Una o dos veces a la semana	Todos los dias	Dos días	Un dia	Un dia	3	2	Si	Mucho más de lo normal	0 min	11-20 min	11-20 min	11-20 min	No	1-2 h	2-3 h	0 min	0 min	1-2 h	0 min	0 min	30-60 min	0 min	Muy a menudo	A menudo	A menudo	A menudo	Casi nunca	A menudo	A menudo	De vez en cuando	De vez en cuando	Nunca	Nunca
29	Mujer	27.4756	Soltero(a)	Tres a cuatro veces por semama	Dos a tres veces al mes	Nunca	Nunca	Dos a tres veces al mes	Dos a tres veces al mes	Una vez al mes	Una vez al mes	Todos los dias	Todos los dias	Una o dos veces a la semana	Dos a tres veces al mes	Una vez al mes	Dos a tres veces al mes	Cuatro días	Cuatro días	Cuatro días	3	2	No	Mucho más de lo normal	16-30 min	21-30 min	21-30 min	21-30 min	Sí	1-2 h	2-3 h	0 min	30-60 min	16-30 min	0 min	0 min	1-2 h	0 min	De vez en cuando	Casi nunca	A menudo	Muy a menudo	A menudo	Casi nunca	Muy a menudo	A menudo	Casi nunca	Una a cuatro veces por semana	Una a tres veces al mes
31	Mujer	20.898	Soltero(a)	Todos los dias	Una o dos veces a la semana	Nunca	Una o dos veces a la semana	Nunca	Nunca	Una vez al mes	Una vez al mes	Todos los dias	Una o dos veces a la semana	Una o dos veces a la semana	Una vez al mes	Una o dos veces a la semana	Todos los dias	Siete días	Siete días	Siete días	3	2	Si	Más o menos igual	16-30 min	1-10 min	21-30 min	21-30 min	Sí	1-2 h	2-3 h	0 min	0 min	16-30 min	0 min	30-60 min	0 min	0 min	De vez en cuando	Casi nunca	A menudo	Muy a menudo	A menudo	De vez en cuando	A menudo	A menudo	De vez en cuando	Todos los dias	Una a cuatro veces por semana
32	Mujer	32.526	Casado(a)	Todos los dias	Todos los dias	Una vez al mes	Dos a tres veces al mes	Una vez al mes	Nunca	Nunca	Nunca	Todos los dias	Dos a tres veces al mes	Todos los dias	Dos a tres veces al mes	Nunca	Dos a tres veces al mes	Un dia	Siete días	Siete días	2	1	Si	Más o menos igual	0 min	0 min	21-30 min	21-30 min	Sí	1-2 h	2-3 h	0 min	0 min	2-3 h	3-4 h	0 min	30-60 min	30-60 min	Muy a menudo	A menudo	A menudo	De vez en cuando	A menudo	A menudo	De vez en cuando	A menudo	De vez en cuando	Todos los dias	Todos los dias
25	Mujer	21.9076	Soltero(a)	Una o dos veces a la semana	Una o dos veces a la semana	Una vez al mes	Tres a cuatro veces por semama	Una o dos veces a la semana	Una vez al mes	Una vez al mes	Nunca	Todos los dias	Tres a cuatro veces por semama	Dos a tres veces al mes	Una o dos veces a la semana	Nunca	Todos los dias	Seis días	Siete días	Siete días	1	2	Si	Mucho más de lo normal	16-30 min	21-30 min	21-30 min	21-30 min	Sí	1-2 h	2-3 h	0 min	1-2 h	2-3 h	0 min	0 min	3-4 h	3-4 h	De vez en cuando	De vez en cuando	Muy a menudo	A menudo	A menudo	De vez en cuando	Muy a menudo	De vez en cuando	De vez en cuando	Una a cuatro veces por semana	Una a cuatro veces por semana
22	Mujer	32.2421	Soltero(a)	Todos los dias	Una o dos veces a la semana	Tres a cuatro veces por semama	Todos los dias	Una o dos veces a la semana	Todos los dias	Una vez al mes	Dos a tres veces al mes	Todos los dias	Todos los dias	Todos los dias	Todos los dias	Una o dos veces a la semana	Todos los dias	Cuatro días	Siete días	Cinco días	3	3	Si	Más o menos igual	0 min	11-20 min	21-30 min	21-30 min	Sí	1-2 h	2-3 h	0 min	0 min	0 min	0 min	3-4 h	0 min	3-4 h	Casi nunca	Casi nunca	Nunca	Muy a menudo	Muy a menudo	Casi nunca	Muy a menudo	A menudo	Nunca	Todos los dias	Una a cuatro veces por semana
21	Hombre	32.872	Soltero(a)	Una o dos veces a la semana	Una vez al mes	Dos a tres veces al mes	Todos los dias	Dos a tres veces al mes	Una vez al mes	Una vez al mes	Nunca	Todos los dias	Dos a tres veces al mes	Una vez al mes	Una vez al mes	Dos a tres veces al mes	Todos los dias	Siete días	Siete días	Siete días	3	2	Si	Mucho más de lo normal	16-30 min	21-30 min	31-60 min	21-30 min	Sí	1-2 h	2-3 h	16-30 min	30-60 min	1-2 h	0 min	0 min	16-30 min	30-60 min	De vez en cuando	De vez en cuando	De vez en cuando	A menudo	A menudo	De vez en cuando	A menudo	De vez en cuando	Casi nunca	Una a cuatro veces por semana	Una a tres veces al mes
27	Hombre	26.1224	Soltero(a)	Una o dos veces a la semana	Nunca	Dos a tres veces al mes	Dos a tres veces al mes	Dos a tres veces al mes	Dos a tres veces al mes	Una vez al mes	Una vez al mes	Todos los dias	Dos a tres veces al mes	Una o dos veces a la semana	Una o dos veces a la semana	Una o dos veces a la semana	Tres a cuatro veces por semama	Seis días	Siete días	Cinco días	3	1	No	Un poco más de lo normal	0 min	11-20 min	21-30 min	11-20 min	Sí	1-2 h	2-3 h	2-3 h	0 min	0 min	0 min	2-3 h	30-60 min	0 min	De vez en cuando	Casi nunca	De vez en cuando	A menudo	De vez en cuando	De vez en cuando	De vez en cuando	De vez en cuando	Casi nunca	Una a cuatro veces por semana	Nunca
70	Mujer	23.5078	Casado(a)	Todos los dias	Nunca	Nunca	Nunca	Nunca	Nunca	Nunca	Nunca	Todos los dias	Una o dos veces a la semana	Todos los dias	Una vez al mes	Nunca	Todos los dias	Siete días	Siete días	Un dia	2	2	Si	Más o menos igual	16-30 min	1-10 min	11-20 min	0 min	No	1-2 h	2-3 h	30-60 min	2-3 h	2-3 h	0 min	1-15 min	1-2 h	3-4 h	De vez en cuando	De vez en cuando	De vez en cuando	A menudo	De vez en cuando	Casi nunca	A menudo	A menudo	Casi nunca	Todos los dias	Nunca
23	Mujer	23.1111	Soltero(a)	Una vez al mes	Nunca	Nunca	Nunca	Nunca	Nunca	Nunca	Nunca	Todos los dias	Dos a tres veces al mes	Nunca	Dos a tres veces al mes	Todos los dias	Todos los dias	Siete días	Siete días	Siete días	3	0	Si	Mucho menos de lo normal	0 min	1-10 min	31-60 min	Más de 1 h	Sí	1-2 h	3-4 h	0 min	1-2 h	0 min	0 min	0 min	1-2 h	0 min	De vez en cuando	Nunca	Nunca	De vez en cuando	Muy a menudo	De vez en cuando	De vez en cuando	A menudo	Nunca	Una a tres veces al mes	Nunca
28	Mujer	29.5858	Soltero(a)	Todos los dias	Nunca	Nunca	Nunca	Todos los dias	Todos los dias	Una vez al mes	Nunca	Todos los dias	Todos los dias	Una o dos veces a la semana	Tres a cuatro veces por semama	Todos los dias	Todos los dias	Siete días	Siete días	Siete días	3	2	Si	Un poco más de lo normal	31-60 min	11-20 min	11-20 min	11-20 min	Sí	1-2 h	3-4 h	0 min	16-30 min	30-60 min	0 min	30-60 min	1-2 h	0 min	Casi nunca	De vez en cuando	De vez en cuando	A menudo	A menudo	De vez en cuando	A menudo	De vez en cuando	Casi nunca	Todos los dias	Nunca
42	Mujer	24.974	Casado(a)	Una o dos veces a la semana	Nunca	Nunca	Una o dos veces a la semana	Nunca	Nunca	Tres a cuatro veces por semana	Tres a cuatro veces por semama	Una vez al mes	Una o dos veces a la semana	Una o dos veces a la semana	Una vez al mes	Todos los dias	Tres a cuatro veces por semama	Siete días	Siete días	Cinco días	3	0	No	Más o menos igual	16-30 min	21-30 min	31-60 min	21-30 min	Sí	1-2 h	3-4 h	0 min	16-30 min	30-60 min	30-60 min	1-2 h	0 min	2-3 h	A menudo	Casi nunca	A menudo	A menudo	A menudo	De vez en cuando	A menudo	De vez en cuando	Casi nunca	Una a cuatro veces por semana	Nunca
34	Mujer	24.7676	Casado(a)	Todos los dias	Todos los dias	Una vez al mes	Una vez al mes	Una vez al mes	Nunca	Dos a tres veces al mes	Nunca	Todos los dias	Todos los dias	Todos los dias	Dos a tres veces al mes	Una vez al mes	Todos los dias	Siete días	Siete días	Siete días	5	2	Si	Mucho menos de lo normal	0 min	11-20 min	11-20 min	11-20 min	Sí	1-2 h	3-4 h	0 min	30-60 min	2-3 h	2-3 h	0 min	3-4 h	0 min	Muy a menudo	De vez en cuando	A menudo	De vez en cuando	A menudo	Muy a menudo	A menudo	De vez en cuando	De vez en cuando	Todos los dias	Todos los dias
22	Mujer	24.4444	Soltero(a)	Todos los dias	Nunca	Todos los dias	Una vez al mes	Una vez al mes	Nunca	Nunca	Nunca	Todos los dias	Una o dos veces a la semana	Una o dos veces a la semana	Dos a tres veces al mes	Dos a tres veces al mes	Una o dos veces a la semana	Siete días	Siete días	Siete días	3	2	No	Más o menos igual	16-30 min	21-30 min	21-30 min	21-30 min	Sí	1-2 h	3-4 h	0 min	0 min	30-60 min	0 min	30-60 min	30-60 min	0 min	De vez en cuando	Casi nunca	Casi nunca	De vez en cuando	A menudo	Casi nunca	De vez en cuando	De vez en cuando	De vez en cuando	Todos los dias	Nunca
27	Mujer	19.3962	Soltero(a)	Una o dos veces a la semana	Dos a tres veces al mes	Nunca	Una vez al mes	Nunca	Nunca	Dos a tres veces al mes	Nunca	Todos los dias	Tres a cuatro veces por semama	Dos a tres veces al mes	Una vez al mes	Dos a tres veces al mes	Todos los dias	Siete días	Siete días	Siete días	3	2	Si	Mucho más de lo normal	16-30 min	21-30 min	Más de 1 h	31-60 min	Sí	1-2 h	3-4 h	0 min	16-30 min	1-15 min	0 min	16-30 min	1-2 h	0 min	Casi nunca	De vez en cuando	A menudo	A menudo	A menudo	De vez en cuando	De vez en cuando	Casi nunca	De vez en cuando	Una a cuatro veces por semana	Una a tres veces al mes
31	Mujer	27.9421	Casado(a)	Todos los dias	Una o dos veces a la semana	Una vez al mes	Dos a tres veces al mes	Todos los dias	Todos los dias	Una vez al mes	Nunca	Nunca	Tres a cuatro veces por semama	Tres a cuatro veces por semama	Una o dos veces a la semana	Dos a tres veces al mes	Todos los dias	Cuatro días	Siete días	Cinco días	3	3	Si	Un poco más de lo normal	Más de 1 hora	Más de 1 h	Más de 1 h	Más de 1 h	No	1-2 h	3-4 h	0 min	0 min	3-4 h	3-4 h	0 min	3-4 h	3-4 h	Muy a menudo	A menudo	Muy a menudo	Muy a menudo	De vez en cuando	A menudo	De vez en cuando	De vez en cuando	A menudo	Todos los dias	Una a cuatro veces por semana
30	Mujer	28.3039	Soltero(a)	Una o dos veces a la semana	Todos los dias	Nunca	Tres a cuatro veces por semama	Nunca	Nunca	Nunca	Todos los dias	Todos los dias	Nunca	Todos los dias	Todos los dias	Todos los dias	Todos los dias	Siete días	Siete días	Un dia	2	1	Si	Más o menos igual	16-30 min	31-60 min	31-60 min	0 min	No	1-2 h	3-4 h	0 min	16-30 min	1-15 min	1-15 min	0 min	0 min	0 min	De vez en cuando	De vez en cuando	De vez en cuando	A menudo	De vez en cuando	Casi nunca	Muy a menudo	A menudo	A menudo	Una a cuatro veces por semana	Todos los dias
21	Mujer	25.5937	Soltero(a)	Tres a cuatro veces por semama	Nunca	Nunca	Nunca	Tres a cuatro veces por semama	Una o dos veces a la semana	Una o dos veces a la semana	Una vez al mes	Todos los dias	Tres a cuatro veces por semama	Una vez al mes	Dos a tres veces al mes	Una o dos veces a la semana	Todos los dias	Siete días	Siete días	Seis días	3	1	Si	Más o menos igual	1-15 min	21-30 min	11-20 min	11-20 min	Sí	1-2 h	3-4 h	0 min	30-60 min	1-2 h	0 min	0 min	16-30 min	30-60 min	De vez en cuando	Casi nunca	A menudo	De vez en cuando	De vez en cuando	De vez en cuando	Casi nunca	De vez en cuando	A menudo	Una a cuatro veces por semana	Nunca
54	Mujer	28.3987	Casado(a)	Todos los dias	Nunca	Una vez al mes	Una vez al mes	Una vez al mes	Dos a tres veces al mes	Una vez al mes	Tres a cuatro veces por semama	Todos los dias	Todos los dias	Dos a tres veces al mes	Dos a tres veces al mes	Una o dos veces a la semana	Todos los dias	Tres dias	Tres dias	Tres dias	3	2	No	Más o menos igual	31-60 min	11-20 min	1-10 min	0 min	Sí	1-2 h	3-4 h	0 min	30-60 min	3-4 h	0 min	30-60 min	30-60 min	0 min	Casi nunca	De vez en cuando	De vez en cuando	A menudo	A menudo	De vez en cuando	A menudo	A menudo	De vez en cuando	Todos los dias	Nunca
29	Mujer	27.2392	Soltero(a)	Tres a cuatro veces por semama	Nunca	Nunca	Una vez al mes	Una vez al mes	Nunca	Una vez al mes	Una vez al mes	Todos los dias	Una vez al mes	Una vez al mes	Una vez al mes	Una vez al mes	Todos los dias	Siete días	Siete días	Siete días	3	1	No	Más o menos igual	31-60 min	21-30 min	21-30 min	21-30 min	Sí	1-2 h	3-4 h	0 min	16-30 min	30-60 min	16-30 min	16-30 min	30-60 min	16-30 min	Casi nunca	Casi nunca	De vez en cuando	A menudo	A menudo	Casi nunca	A menudo	A menudo	Casi nunca	Una a cuatro veces por semana	Nunca
51	Hombre	30.1038	Casado(a)	Tres a cuatro veces por semama	Nunca	Dos a tres veces al mes	Todos los dias	Todos los dias	Todos los dias	Nunca	Nunca	Todos los dias	Todos los dias	Dos a tres veces al mes	Una o dos veces a la semana	Dos a tres veces al mes	Todos los dias	Siete días	Siete días	Tres dias	3	1	Si	Un poco más de lo normal	1-15 min	1-10 min	11-20 min	1-10 min	Sí	1-2 h	3-4 h	0 min	30-60 min	0 min	0 min	0 min	0 min	0 min	Muy a menudo	A menudo	Muy a menudo	De vez en cuando	De vez en cuando	A menudo	A menudo	Casi nunca	A menudo	Una a cuatro veces por semana	Nunca
22	Hombre	26.2976	Soltero(a)	Todos los dias	Nunca	Nunca	Tres a cuatro veces por semama	Una vez al mes	Una vez al mes	Nunca	Una vez al mes	Todos los dias	Una o dos veces a la semana	Todos los dias	Tres a cuatro veces por semama	Dos a tres veces al mes	Todos los dias	Siete días	Siete días	Siete días	3	3	Si	Un poco más de lo normal	Más de 1 hora	11-20 min	11-20 min	21-30 min	Sí	1-2 h	3-4 h	0 min	30-60 min	30-60 min	0 min	0 min	30-60 min	0 min	De vez en cuando	De vez en cuando	Casi nunca	A menudo	A menudo	Casi nunca	A menudo	Casi nunca	Casi nunca	Todos los dias	Nunca
36	Mujer	21.2279	Casado(a)	Una o dos veces a la semana	Nunca	Una vez al mes	Una vez al mes	Una vez al mes	Nunca	Una vez al mes	Nunca	Todos los dias	Una vez al mes	Una o dos veces a la semana	Dos a tres veces al mes	Tres a cuatro veces por semama	Todos los dias	Siete días	Siete días	Cinco días	3	1	Si	Más o menos igual	Más de 1 hora	11-20 min	31-60 min	11-20 min	Sí	1-2 h	3-4 h	1-15 min	30-60 min	2-3 h	0 min	1-2 h	1-2 h	0 min	De vez en cuando	Nunca	Casi nunca	Muy a menudo	A menudo	Casi nunca	Muy a menudo	A menudo	Nunca	Una a cuatro veces por semana	Nunca
22	Hombre	28.3419	Soltero(a)	Todos los dias	Nunca	Nunca	Nunca	Una vez al mes	Nunca	Una vez al mes	Una vez al mes	Todos los dias	Dos a tres veces al mes	Una vez al mes	Dos a tres veces al mes	Todos los dias	Todos los dias	Siete días	Siete días	Siete días	3	3	Si	Mucho más de lo normal	0 min	11-20 min	11-20 min	11-20 min	Sí	1-2 h	3-4 h	1-2 h	0 min	0 min	0 min	30-60 min	30-60 min	2-3 h	Casi nunca	Casi nunca	Casi nunca	Muy a menudo	A menudo	Casi nunca	Muy a menudo	A menudo	Casi nunca	Todos los dias	Nunca
49	Mujer	23.9361	Casado(a)	Una o dos veces a la semana	Una vez al mes	Nunca	Nunca	Nunca	Nunca	Nunca	Nunca	Todos los dias	Todos los dias	Una o dos veces a la semana	Dos a tres veces al mes	Todos los dias	Nunca	Siete días	Siete días	Siete días	3	2	Si	Un poco más de lo normal	1-15 min	21-30 min	21-30 min	21-30 min	Sí	1-2 h	3-4 h	1-2 h	16-30 min	16-30 min	16-30 min	16-30 min	16-30 min	30-60 min	Casi nunca	De vez en cuando	De vez en cuando	A menudo	De vez en cuando	De vez en cuando	A menudo	A menudo	De vez en cuando	Una a cuatro veces por semana	Una a tres veces al mes
20	Hombre	25.0593	Soltero(a)	Una o dos veces a la semana	Nunca	Nunca	Dos a tres veces al mes	Dos a tres veces al mes	Dos a tres veces al mes	Dos a tres veces al mes	Dos a tres veces al mes	Todos los dias	Una o dos veces a la semana	Una o dos veces a la semana	Dos a tres veces al mes	Una vez al mes	Tres a cuatro veces por semama	Siete días	Siete días	Siete días	3	2	No	Mucho menos de lo normal	Más de 1 hora	11-20 min	21-30 min	21-30 min	Sí	1-2 h	3-4 h	16-30 min	30-60 min	30-60 min	0 min	0 min	2-3 h	2-3 h	De vez en cuando	De vez en cuando	A menudo	De vez en cuando	De vez en cuando	Casi nunca	A menudo	De vez en cuando	De vez en cuando	Una a cuatro veces por semana	Nunca
32	Mujer	42.9688	Soltero(a)	Todos los dias	Nunca	Nunca	Una o dos veces a la semana	Dos a tres veces al mes	Una o dos veces a la semana	Una o dos veces a la semana	Nunca	Todos los dias	Todos los dias	Todos los dias	Dos a tres veces al mes	Una vez al mes	Tres a cuatro veces por semama	Cinco días	Siete días	Siete días	3	2	No	Mucho más de lo normal	31-60 min	11-20 min	31-60 min	31-60 min	No	1-2 h	3-4 h	2-3 h	0 min	30-60 min	3-4 h	0 min	3-4 h	0 min	Casi nunca	Casi nunca	De vez en cuando	A menudo	A menudo	A menudo	A menudo	A menudo	De vez en cuando	Todos los dias	Nunca
39	Mujer	32.7449	Casado(a)	Todos los dias	Nunca	Nunca	Todos los dias	Nunca	Todos los dias	Una vez al mes	Nunca	Todos los dias	Todos los dias	Una vez al mes	Tres a cuatro veces por semama	Tres a cuatro veces por semama	Dos a tres veces al mes	Siete días	Siete días	Siete días	2	3	No	Mucho menos de lo normal	16-30 min	21-30 min	21-30 min	31-60 min	No	1-2 h	30-60 min	0 min	0 min	0 min	0 min	0 min	0 min	0 min	A menudo	Muy a menudo	Muy a menudo	De vez en cuando	De vez en cuando	A menudo	A menudo	De vez en cuando	De vez en cuando	Todos los dias	Nunca
66	Mujer	19.4734	Casado(a)	Tres a cuatro veces por semama	Nunca	Una vez al mes	Dos a tres veces al mes	Nunca	Nunca	Nunca	Nunca	Todos los dias	Todos los dias	Dos a tres veces al mes	Nunca	Todos los dias	Todos los dias	Siete días	Siete días	Tres dias	2	2	No	Más o menos igual	1-15 min	11-20 min	21-30 min	1-10 min	No	1-2 h	30-60 min	0 min	30-60 min	1-2 h	0 min	30-60 min	0 min	0 min	A menudo	De vez en cuando	De vez en cuando	A menudo	Muy a menudo	Casi nunca	Muy a menudo	A menudo	Nunca	Una a cuatro veces por semana	Nunca
63	Hombre	28.3604	Soltero(a)	Dos a tres veces al mes	Dos a tres veces al mes	Nunca	Dos a tres veces al mes	Nunca	Nunca	Nunca	Una vez al mes	Todos los dias	Una vez al mes	Nunca	Nunca	Todos los dias	Todos los dias	Cinco días	Cinco días	Cinco días	3	0	Si	Más o menos igual	31-60 min	11-20 min	21-30 min	11-20 min	Sí	1-2 h	30-60 min	0 min	16-30 min	16-30 min	0 min	0 min	16-30 min	30-60 min	Nunca	Nunca	Nunca	Muy a menudo	Muy a menudo	Nunca	A menudo	A menudo	Nunca	Una a tres veces al mes	Una a tres veces al mes
21	Mujer	24.4646	Soltero(a)	Una o dos veces a la semana	Nunca	Tres a cuatro veces por semama	Todos los dias	Todos los dias	Todos los dias	Todos los dias	Nunca	Todos los dias	Todos los dias	Todos los dias	Todos los dias	Una o dos veces a la semana	Todos los dias	Un dia	Siete días	Cuatro días	2	3	Si	Mucho más de lo normal	0 min	0 min	21-30 min	31-60 min	Sí	1-2 h	30-60 min	0 min	1-2 h	0 min	3-4 h	0 min	16-30 min	0 min	De vez en cuando	De vez en cuando	A menudo	A menudo	A menudo	De vez en cuando	A menudo	Casi nunca	Casi nunca	Una a cuatro veces por semana	Nunca
70	Mujer	21.1553	Viudo(a)	Nunca	Nunca	Nunca	Nunca	Nunca	Nunca	Nunca	Nunca	Todos los dias	Todos los dias	Todos los dias	Nunca	Todos los dias	Todos los dias	Siete días	Siete días	Siete días	1	0	No	Un poco más de lo normal	1-15 min	Más de 1 h	Más de 1 h	31-60 min	Sí	1-2 h	30-60 min	0 min	1-2 h	30-60 min	0 min	1-2 h	1-2 h	1-2 h	Casi nunca	Casi nunca	Casi nunca	A menudo	A menudo	De vez en cuando	A menudo	A menudo	Casi nunca	Nunca	Nunca
22	Mujer	30.0433	Soltero(a)	Dos a tres veces al mes	Una vez al mes	Dos a tres veces al mes	Dos a tres veces al mes	Dos a tres veces al mes	Una vez al mes	Una vez al mes	Una vez al mes	Todos los dias	Una o dos veces a la semana	Una o dos veces a la semana	Una o dos veces a la semana	Dos a tres veces al mes	Nunca	Siete días	Siete días	Siete días	3	1	Si	Mucho más de lo normal	1-15 min	1-10 min	11-20 min	1-10 min	Sí	1-2 h	30-60 min	0 min	30-60 min	16-30 min	2-3 h	1-15 min	1-2 h	0 min	De vez en cuando	De vez en cuando	De vez en cuando	A menudo	A menudo	De vez en cuando	Muy a menudo	A menudo	De vez en cuando	Una a tres veces al mes	Una a tres veces al mes
30	Mujer	19.5717	Casado(a)	Dos a tres veces al mes	Nunca	Nunca	Una vez al mes	Una vez al mes	Nunca	Nunca	Nunca	Todos los dias	Una vez al mes	Una vez al mes	Una vez al mes	Una o dos veces a la semana	Todos los dias	Siete días	Siete días	Siete días	4	0	Si	Mucho menos de lo normal	0 min	11-20 min	21-30 min	11-20 min	Sí	1-2 h	30-60 min	0 min	30-60 min	3-4 h	3-4 h	0 min	0 min	0 min	De vez en cuando	Casi nunca	A menudo	Muy a menudo	De vez en cuando	A menudo	A menudo	De vez en cuando	Casi nunca	Una a tres veces al mes	Nunca
18	Hombre	24.2123	Soltero(a)	Todos los dias	Nunca	Una vez al mes	Una o dos veces a la semana	Nunca	Nunca	Nunca	Una vez al mes	Todos los dias	Una vez al mes	Dos a tres veces al mes	Una vez al mes	Una o dos veces a la semana	Todos los dias	Siete días	Siete días	Siete días	3	2	Si	Mucho más de lo normal	16-30 min	11-20 min	21-30 min	11-20 min	Sí	16-30 min	0 min	0 min	1-2 h	0 min	0 min	0 min	1-15 min	3-4 h	Muy a menudo	De vez en cuando	De vez en cuando	Muy a menudo	De vez en cuando	Casi nunca	Muy a menudo	A menudo	De vez en cuando	Todos los dias	Nunca
34	Mujer	34.8502	Soltero(a)	Tres a cuatro veces por semama	Tres a cuatro veces por semama	Una o dos veces a la semana	Una vez al mes	Una o dos veces a la semana	Una o dos veces a la semana	Una vez al mes	Nunca	Todos los dias	Nunca	Todos los dias	Tres a cuatro veces por semama	Una o dos veces a la semana	Todos los dias	Siete días	Siete días	Siete días	3	1	Si	Más o menos igual	0 min	11-20 min	11-20 min	11-20 min	No	16-30 min	0 min	0 min	0 min	1-15 min	0 min	1-15 min	1-15 min	0 min	De vez en cuando	A menudo	A menudo	De vez en cuando	De vez en cuando	De vez en cuando	A menudo	De vez en cuando	A menudo	Una a cuatro veces por semana	Una a cuatro veces por semana
35	Mujer	31.2213	Casado(a)	Dos a tres veces al mes	Dos a tres veces al mes	Nunca	Dos a tres veces al mes	Dos a tres veces al mes	Dos a tres veces al mes	Nunca	Nunca	Todos los dias	Tres a cuatro veces por semama	Dos a tres veces al mes	Una vez al mes	Dos a tres veces al mes	Todos los dias	Cuatro días	Siete días	Siete días	3	1	No	Mucho más de lo normal	0 min	1-10 min	11-20 min	11-20 min	No	16-30 min	0 min	0 min	0 min	1-15 min	1-15 min	1-15 min	1-15 min	1-15 min	De vez en cuando	De vez en cuando	De vez en cuando	A menudo	Muy a menudo	Casi nunca	A menudo	A menudo	Casi nunca	Una a tres veces al mes	Una a tres veces al mes
45	Mujer	33.6221	Casado(a)	Tres a cuatro veces por semama	Tres a cuatro veces por semama	Nunca	Nunca	Todos los dias	Nunca	Dos a tres veces al mes	Una vez al mes	Todos los dias	Dos a tres veces al mes	Una vez al mes	Una vez al mes	Una o dos veces a la semana	Dos a tres veces al mes	Un dia	Siete días	Cinco días	2	1	No	Más o menos igual	0 min	0 min	Más de 1 h	31-60 min	Sí	16-30 min	1-15 min	0 min	1-15 min	1-15 min	1-15 min	0 min	1-15 min	1-15 min	Casi nunca	Casi nunca	De vez en cuando	Casi nunca	De vez en cuando	Casi nunca	A menudo	A menudo	Nunca	Una a cuatro veces por semana	Una a cuatro veces por semana
25	Mujer	31.6443	Soltero(a)	Tres a cuatro veces por semama	Todos los dias	Nunca	Nunca	Una vez al mes	Una vez al mes	Nunca	Una vez al mes	Todos los dias	Una o dos veces a la semana	Una o dos veces a la semana	Dos a tres veces al mes	Nunca	Una o dos veces a la semana	Seis días	Siete días	Seis días	3	2	No	Un poco más de lo normal	31-60 min	21-30 min	21-30 min	11-20 min	Sí	16-30 min	1-15 min	0 min	0 min	2-3 h	0 min	30-60 min	2-3 h	1-15 min	De vez en cuando	De vez en cuando	De vez en cuando	De vez en cuando	A menudo	De vez en cuando	De vez en cuando	De vez en cuando	De vez en cuando	Una a cuatro veces por semana	Todos los dias
25	Mujer	26.6667	Soltero(a)	Tres a cuatro veces por semama	Nunca	Nunca	Nunca	Nunca	Nunca	Dos a tres veces al mes	Nunca	Dos a tres veces al mes	Dos a tres veces al mes	Una o dos veces a la semana	Dos a tres veces al mes	Tres a cuatro veces por semama	Todos los dias	Siete días	Siete días	Un dia	2	1	No	Un poco más de lo normal	31-60 min	11-20 min	21-30 min	0 min	Sí	16-30 min	1-15 min	0 min	1-2 h	16-30 min	0 min	0 min	3-4 h	0 min	A menudo	De vez en cuando	A menudo	Muy a menudo	A menudo	De vez en cuando	A menudo	Muy a menudo	De vez en cuando	Una a cuatro veces por semana	Nunca
32	Mujer	29.2101	Soltero(a)	Una o dos veces a la semana	Dos a tres veces al mes	Una vez al mes	Una vez al mes	Una vez al mes	Nunca	Una vez al mes	Una vez al mes	Una o dos veces a la semana	Todos los dias	Tres a cuatro veces por semama	Tres a cuatro veces por semama	Una vez al mes	Todos los dias	Un dia	Un dia	Un dia	3	1	No	Un poco menos de lo normal	0 min	1-10 min	21-30 min	31-60 min	No	16-30 min	1-15 min	0 min	0 min	3-4 h	3-4 h	0 min	0 min	0 min	A menudo	Muy a menudo	Muy a menudo	A menudo	De vez en cuando	A menudo	A menudo	De vez en cuando	A menudo	Una a cuatro veces por semana	Una a tres veces al mes
59	Hombre	25.9516	Casado(a)	Tres a cuatro veces por semama	Dos a tres veces al mes	Nunca	Nunca	Nunca	Nunca	Una o dos veces a la semana	Una vez al mes	Todos los dias	Dos a tres veces al mes	Dos a tres veces al mes	Una vez al mes	Una o dos veces a la semana	Todos los dias	Siete días	Seis días	Dos días	3	1	No	Un poco más de lo normal	0 min	1-10 min	11-20 min	11-20 min	Sí	16-30 min	1-15 min	0 min	1-15 min	0 min	0 min	0 min	0 min	0 min	Nunca	Casi nunca	A menudo	A menudo	A menudo	De vez en cuando	A menudo	A menudo	De vez en cuando	Una a cuatro veces por semana	Una a tres veces al mes
19	Mujer	23.833	Soltero(a)	Una o dos veces a la semana	Una vez al mes	Una o dos veces a la semana	Una o dos veces a la semana	Todos los dias	Todos los dias	Una o dos veces a la semana	Dos a tres veces al mes	Tres a cuatro veces por semama	Todos los dias	Todos los dias	Tres a cuatro veces por semama	Una o dos veces a la semana	Todos los dias	Siete días	Siete días	Siete días	3	2	No	Mucho más de lo normal	Más de 1 hora	11-20 min	11-20 min	11-20 min	Sí	16-30 min	1-2 h	0 min	2-3 h	30-60 min	0 min	0 min	16-30 min	3-4 h	A menudo	De vez en cuando	Muy a menudo	De vez en cuando	De vez en cuando	De vez en cuando	De vez en cuando	De vez en cuando	A menudo	Una a cuatro veces por semana	Una a tres veces al mes
23	Mujer	39.8586	Soltero(a)	Una vez al mes	Dos a tres veces al mes	Una o dos veces a la semana	Una o dos veces a la semana	Dos a tres veces al mes	Dos a tres veces al mes	Una vez al mes	Nunca	Todos los dias	Dos a tres veces al mes	Una o dos veces a la semana	Una vez al mes	Una o dos veces a la semana	Tres a cuatro veces por semama	Seis días	Siete días	Siete días	3	0	No	Mucho más de lo normal	0 min	11-20 min	21-30 min	21-30 min	Sí	16-30 min	1-2 h	0 min	1-2 h	0 min	0 min	0 min	1-15 min	0 min	Muy a menudo	A menudo	Muy a menudo	De vez en cuando	Casi nunca	De vez en cuando	De vez en cuando	Casi nunca	Muy a menudo	Una a tres veces al mes	Una a tres veces al mes
21	Mujer	20.4467	Soltero(a)	Todos los dias	Nunca	Dos a tres veces al mes	Todos los dias	Una o dos veces a la semana	Una o dos veces a la semana	Una o dos veces a la semana	Una vez al mes	Todos los dias	Tres a cuatro veces por semama	Todos los dias	Nunca	Dos a tres veces al mes	Nunca	Dos días	Siete días	Dos días	1	1	Si	Un poco más de lo normal	31-60 min	0 min	31-60 min	11-20 min	Sí	16-30 min	1-2 h	0 min	30-60 min	16-30 min	0 min	0 min	2-3 h	2-3 h	Nunca	Casi nunca	Nunca	Casi nunca	A menudo	Casi nunca	A menudo	A menudo	Casi nunca	Todos los dias	Nunca
26	Mujer	31.25	Soltero(a)	Dos a tres veces al mes	Nunca	Una vez al mes	Nunca	Una vez al mes	Una vez al mes	Una o dos veces a la semana	Una vez al mes	Dos a tres veces al mes	Tres a cuatro veces por semama	Dos a tres veces al mes	Una o dos veces a la semana	Una o dos veces a la semana	Todos los dias	Siete días	Siete días	Siete días	3	0	Si	Mucho más de lo normal	0 min	21-30 min	21-30 min	31-60 min	Sí	16-30 min	1-2 h	0 min	0 min	16-30 min	0 min	0 min	1-15 min	0 min	De vez en cuando	De vez en cuando	A menudo	De vez en cuando	De vez en cuando	De vez en cuando	A menudo	De vez en cuando	De vez en cuando	Una a tres veces al mes	Nunca
28	Mujer	27.3438	Soltero(a)	Una o dos veces a la semana	Dos a tres veces al mes	Una vez al mes	Una vez al mes	Una vez al mes	Una vez al mes	Una vez al mes	Nunca	Todos los dias	Dos a tres veces al mes	Una o dos veces a la semana	Una vez al mes	Una vez al mes	Una o dos veces a la semana	Siete días	Siete días	Tres dias	2	0	Si	Mucho más de lo normal	0 min	11-20 min	11-20 min	11-20 min	Sí	16-30 min	1-2 h	1-2 h	0 min	0 min	0 min	0 min	30-60 min	0 min	De vez en cuando	A menudo	De vez en cuando	A menudo	A menudo	Casi nunca	A menudo	A menudo	Casi nunca	Una a cuatro veces por semana	Una a tres veces al mes
26	Mujer	25.6055	Soltero(a)	Nunca	Todos los dias	Una vez al mes	Una vez al mes	Nunca	Una vez al mes	Nunca	Una vez al mes	Todos los dias	Una vez al mes	Nunca	Dos a tres veces al mes	Nunca	Todos los dias	Un dia	Siete días	Cinco días	2	0	Si	Más o menos igual	0 min	0 min	21-30 min	0 min	No	16-30 min	1-2 h	30-60 min	2-3 h	2-3 h	0 min	16-30 min	2-3 h	30-60 min	Nunca	De vez en cuando	De vez en cuando	A menudo	A menudo	De vez en cuando	A menudo	De vez en cuando	Casi nunca	Nunca	Todos los dias
43	Mujer	41.4016	Separado(a)	Todos los dias	Dos a tres veces al mes	Una o dos veces a la semana	Tres a cuatro veces por semama	Dos a tres veces al mes	Una o dos veces a la semana	Una o dos veces a la semana	Nunca	Dos a tres veces al mes	Tres a cuatro veces por semama	Una vez al mes	Una vez al mes	Nunca	Todos los dias	Siete días	Siete días	Un dia	2	1	No	Mucho más de lo normal	0 min	Más de 1 h	Más de 1 h	Más de 1 h	Sí	16-30 min	16-30 min	0 min	0 min	1-15 min	0 min	0 min	1-15 min	0 min	Casi nunca	De vez en cuando	A menudo	De vez en cuando	A menudo	De vez en cuando	De vez en cuando	A menudo	De vez en cuando	Todos los dias	Una a tres veces al mes
30	Mujer	25.6312	Soltero(a)	Todos los dias	Nunca	Una vez al mes	Nunca	Nunca	Una vez al mes	Una vez al mes	Nunca	Todos los dias	Todos los dias	Todos los dias	Una vez al mes	Tres a cuatro veces por semama	Todos los dias	Siete días	Siete días	Siete días	3	2	Si	Mucho más de lo normal	1-15 min	Más de 1 h	Más de 1 h	Más de 1 h	Sí	16-30 min	16-30 min	0 min	1-15 min	1-15 min	1-15 min	0 min	1-15 min	0 min	De vez en cuando	De vez en cuando	A menudo	A menudo	A menudo	De vez en cuando	A menudo	A menudo	A menudo	Todos los dias	Nunca
37	Mujer	29.6427	Soltero(a)	Una o dos veces a la semana	Una vez al mes	Una vez al mes	Dos a tres veces al mes	Dos a tres veces al mes	Tres a cuatro veces por semama	Una vez al mes	Una vez al mes	Todos los dias	Una o dos veces a la semana	Una o dos veces a la semana	Dos a tres veces al mes	Una vez al mes	Todos los dias	Siete días	Siete días	Siete días	3	1	Si	Un poco más de lo normal	0 min	1-10 min	Más de 1 h	Más de 1 h	No	16-30 min	16-30 min	0 min	1-15 min	0 min	0 min	1-15 min	0 min	0 min	De vez en cuando	De vez en cuando	A menudo	De vez en cuando	De vez en cuando	De vez en cuando	De vez en cuando	De vez en cuando	Casi nunca	Una a cuatro veces por semana	Una a tres veces al mes
46	Mujer	24.7676	Soltero(a)	Todos los dias	Nunca	Nunca	Una o dos veces a la semana	Nunca	Nunca	Nunca	Nunca	Todos los dias	Una o dos veces a la semana	Nunca	Nunca	Tres a cuatro veces por semama	Nunca	Siete días	Siete días	Siete días	3	2	Si	Mucho más de lo normal	0 min	21-30 min	21-30 min	21-30 min	Sí	16-30 min	16-30 min	0 min	30-60 min	0 min	0 min	0 min	30-60 min	0 min	De vez en cuando	Casi nunca	De vez en cuando	Muy a menudo	Muy a menudo	Casi nunca	Muy a menudo	Muy a menudo	Casi nunca	Todos los dias	Nunca
32	Mujer	27.9421	Soltero(a)	Todos los dias	Nunca	Una vez al mes	Tres a cuatro veces por semama	Una o dos veces a la semana	Tres a cuatro veces por semama	Una o dos veces a la semana	Nunca	Tres a cuatro veces por semama	Todos los dias	Todos los dias	Una vez al mes	Una o dos veces a la semana	Todos los dias	Siete días	Siete días	Cinco días	3	1	Si	Un poco más de lo normal	1-15 min	21-30 min	31-60 min	Más de 1 h	No	16-30 min	16-30 min	0 min	1-15 min	1-15 min	1-15 min	0 min	1-15 min	1-15 min	De vez en cuando	Casi nunca	De vez en cuando	A menudo	A menudo	Casi nunca	A menudo	De vez en cuando	Nunca	Todos los dias	Nunca
31	Mujer	25.2826	Separado(a)	Todos los dias	Nunca	Nunca	Nunca	Una vez al mes	Una vez al mes	Nunca	Nunca	Todos los dias	Una o dos veces a la semana	Una vez al mes	Una vez al mes	Una o dos veces a la semana	Todos los dias	Siete días	Siete días	Siete días	3	2	Si	Un poco más de lo normal	0 min	11-20 min	11-20 min	11-20 min	Sí	16-30 min	16-30 min	0 min	1-15 min	1-15 min	1-15 min	1-15 min	1-15 min	0 min	Casi nunca	Casi nunca	A menudo	A menudo	A menudo	Casi nunca	A menudo	A menudo	Casi nunca	Todos los dias	Nunca
42	Mujer	22.2137	Separado(a)	Todos los dias	Nunca	Dos a tres veces al mes	Dos a tres veces al mes	Una vez al mes	Una vez al mes	Dos a tres veces al mes	Una vez al mes	Nunca	Una o dos veces a la semana	Una o dos veces a la semana	Una o dos veces a la semana	Una o dos veces a la semana	Dos a tres veces al mes	Siete días	Siete días	Siete días	3	2	Si	Mucho más de lo normal	16-30 min	21-30 min	Más de 1 h	31-60 min	Sí	16-30 min	16-30 min	0 min	0 min	1-15 min	0 min	1-15 min	1-15 min	0 min	De vez en cuando	De vez en cuando	A menudo	De vez en cuando	De vez en cuando	De vez en cuando	De vez en cuando	De vez en cuando	De vez en cuando	Todos los dias	Nunca
51	Mujer	24.1672	Casado(a)	Dos a tres veces al mes	Una o dos veces a la semana	Una vez al mes	Una vez al mes	Una vez al mes	Nunca	Nunca	Nunca	Todos los dias	Una o dos veces a la semana	Nunca	Nunca	Todos los dias	Todos los dias	Siete días	Siete días	Un dia	2	0	Si	Un poco más de lo normal	0 min	21-30 min	21-30 min	21-30 min	Sí	16-30 min	16-30 min	0 min	0 min	1-15 min	0 min	0 min	0 min	1-15 min	Muy a menudo	Muy a menudo	Muy a menudo	Muy a menudo	De vez en cuando	Muy a menudo	De vez en cuando	De vez en cuando	Muy a menudo	Una a tres veces al mes	Una a cuatro veces por semana
23	Mujer	27.4348	Soltero(a)	Nunca	Nunca	Una o dos veces a la semana	Una o dos veces a la semana	Todos los dias	Tres a cuatro veces por semama	Dos a tres veces al mes	Una vez al mes	Todos los dias	Una o dos veces a la semana	Dos a tres veces al mes	Tres a cuatro veces por semama	Dos a tres veces al mes	Todos los dias	Cinco días	Siete días	Seis días	3	0	No	Mucho menos de lo normal	16-30 min	11-20 min	11-20 min	1-10 min	Sí	16-30 min	16-30 min	0 min	0 min	1-15 min	0 min	0 min	1-15 min	0 min	A menudo	De vez en cuando	A menudo	De vez en cuando	De vez en cuando	De vez en cuando	A menudo	De vez en cuando	De vez en cuando	Nunca	Nunca
42	Mujer	29.4118	Separado(a)	Tres a cuatro veces por semama	Nunca	Una vez al mes	Tres a cuatro veces por semama	Tres a cuatro veces por semama	Tres a cuatro veces por semama	Nunca	Nunca	Todos los dias	Todos los dias	Tres a cuatro veces por semama	Una o dos veces a la semana	Una o dos veces a la semana	Todos los dias	Siete días	Siete días	Siete días	3	2	Si	Un poco menos de lo normal	0 min	0 min	11-20 min	0 min	Sí	16-30 min	16-30 min	0 min	0 min	0 min	30-60 min	0 min	0 min	0 min	De vez en cuando	De vez en cuando	Muy a menudo	De vez en cuando	A menudo	A menudo	A menudo	A menudo	De vez en cuando	Una a cuatro veces por semana	Nunca
25	Mujer	24.0346	Soltero(a)	Todos los dias	Nunca	Dos a tres veces al mes	Dos a tres veces al mes	Una o dos veces a la semana	Una o dos veces a la semana	Una vez al mes	Nunca	Todos los dias	Una o dos veces a la semana	Dos a tres veces al mes	Una vez al mes	Una vez al mes	Todos los dias	Siete días	Siete días	Siete días	3	2	Si	Un poco más de lo normal	0 min	11-20 min	11-20 min	11-20 min	Sí	16-30 min	16-30 min	0 min	16-30 min	0 min	0 min	0 min	16-30 min	0 min	De vez en cuando	A menudo	A menudo	De vez en cuando	De vez en cuando	A menudo	De vez en cuando	De vez en cuando	A menudo	Todos los dias	Nunca
42	Mujer	31.5537	Casado(a)	Todos los dias	Nunca	Todos los dias	Tres a cuatro veces por semama	Todos los dias	Todos los dias	Tres a cuatro veces por semana	Dos a tres veces al mes	Una o dos veces a la semana	Todos los dias	Una o dos veces a la semana	Una o dos veces a la semana	Todos los dias	Todos los dias	Siete días	Siete días	Siete días	3	2	No	Más o menos igual	0 min	31-60 min	31-60 min	21-30 min	No	16-30 min	16-30 min	0 min	0 min	1-15 min	0 min	0 min	0 min	1-15 min	A menudo	A menudo	Muy a menudo	De vez en cuando	De vez en cuando	A menudo	De vez en cuando	De vez en cuando	A menudo	Todos los dias	Nunca
25	Mujer	24	Soltero(a)	Dos a tres veces al mes	Una vez al mes	Nunca	Dos a tres veces al mes	Una vez al mes	Nunca	Nunca	Nunca	Tres a cuatro veces por semama	Dos a tres veces al mes	Una vez al mes	Una vez al mes	Una o dos veces a la semana	Todos los dias	Siete días	Siete días	Siete días	3	1	Si	Un poco más de lo normal	0 min	1-10 min	1-10 min	1-10 min	Sí	16-30 min	16-30 min	0 min	1-15 min	0 min	1-15 min	1-15 min	0 min	0 min	De vez en cuando	De vez en cuando	De vez en cuando	A menudo	A menudo	Casi nunca	A menudo	A menudo	Casi nunca	Una a tres veces al mes	Una a tres veces al mes
28	Mujer	28.125	Casado(a)	Una o dos veces a la semana	Una o dos veces a la semana	Una vez al mes	Dos a tres veces al mes	Tres a cuatro veces por semama	Una o dos veces a la semana	Dos a tres veces al mes	Nunca	Una o dos veces a la semana	Dos a tres veces al mes	Tres a cuatro veces por semama	Tres a cuatro veces por semama	Dos a tres veces al mes	Todos los dias	Siete días	Siete días	Siete días	1	1	Si	Un poco más de lo normal	0 min	11-20 min	Más de 1 h	21-30 min	No	16-30 min	16-30 min	0 min	0 min	1-15 min	1-15 min	0 min	1-15 min	1-15 min	Casi nunca	A menudo	Casi nunca	A menudo	Muy a menudo	Casi nunca	A menudo	A menudo	Casi nunca	Una a cuatro veces por semana	Una a cuatro veces por semana
37	Mujer	36.5736	Casado(a)	Todos los dias	Nunca	Nunca	Una vez al mes	Dos a tres veces al mes	Una o dos veces a la semana	Nunca	Nunca	Todos los dias	Todos los dias	Una vez al mes	Una vez al mes	Dos a tres veces al mes	Dos a tres veces al mes	Siete días	Siete días	Siete días	5	3	Si	Mucho menos de lo normal	0 min	1-10 min	11-20 min	11-20 min	Sí	16-30 min	16-30 min	0 min	1-15 min	3-4 h	3-4 h	16-30 min	30-60 min	1-15 min	De vez en cuando	De vez en cuando	A menudo	A menudo	De vez en cuando	De vez en cuando	De vez en cuando	A menudo	De vez en cuando	Todos los dias	Nunca
20	Mujer	39.5197	Soltero(a)	Una o dos veces a la semana	Nunca	Una o dos veces a la semana	Una o dos veces a la semana	Una o dos veces a la semana	Todos los dias	Dos a tres veces al mes	Una vez al mes	Todos los dias	Todos los dias	Todos los dias	Tres a cuatro veces por semama	Dos a tres veces al mes	Todos los dias	Siete días	Siete días	Cuatro días	3	1	No	Mucho más de lo normal	Más de 1 hora	21-30 min	21-30 min	11-20 min	No	16-30 min	16-30 min	0 min	0 min	1-15 min	2-3 h	0 min	2-3 h	0 min	Muy a menudo	Muy a menudo	De vez en cuando	Muy a menudo	A menudo	De vez en cuando	A menudo	A menudo	De vez en cuando	Una a cuatro veces por semana	Nunca
62	Hombre	23.8087	Casado(a)	Nunca	Nunca	Nunca	Nunca	Nunca	Nunca	Nunca	Nunca	Todos los dias	Una vez al mes	Nunca	Nunca	Todos los dias	Todos los dias	Siete días	Siete días	Siete días	3	1	No	Un poco más de lo normal	0 min	31-60 min	Más de 1 h	Más de 1 h	Sí	16-30 min	16-30 min	0 min	1-15 min	1-15 min	1-15 min	0 min	1-15 min	0 min	De vez en cuando	De vez en cuando	De vez en cuando	A menudo	Muy a menudo	De vez en cuando	A menudo	Muy a menudo	Casi nunca	Nunca	Nunca
32	Mujer	37.5924	Soltero(a)	Todos los dias	Nunca	Una o dos veces a la semana	Una o dos veces a la semana	Tres a cuatro veces por semama	Todos los dias	Todos los dias	Dos a tres veces al mes	Todos los dias	Una o dos veces a la semana	Una o dos veces a la semana	Tres a cuatro veces por semama	Dos a tres veces al mes	Todos los dias	Siete días	Siete días	Siete días	3	2	No	Más o menos igual	Más de 1 hora	1-10 min	11-20 min	1-10 min	No	16-30 min	16-30 min	0 min	0 min	30-60 min	3-4 h	0 min	30-60 min	1-15 min	De vez en cuando	A menudo	Muy a menudo	A menudo	De vez en cuando	De vez en cuando	Muy a menudo	De vez en cuando	De vez en cuando	Todos los dias	Nunca
24	Mujer	25.5588	Soltero(a)	Todos los dias	Nunca	Nunca	Nunca	Nunca	Nunca	Una o dos veces a la semana	Nunca	Todos los dias	Nunca	Todos los dias	Una o dos veces a la semana	Una o dos veces a la semana	Todos los dias	Siete días	Siete días	Siete días	3	2	Si	Un poco más de lo normal	16-30 min	Más de 1 h	Más de 1 h	Más de 1 h	Sí	16-30 min	16-30 min	0 min	1-15 min	1-15 min	0 min	1-15 min	0 min	1-15 min	De vez en cuando	Nunca	Nunca	Muy a menudo	A menudo	Casi nunca	A menudo	A menudo	Nunca	Todos los dias	Nunca
64	Mujer	22.5069	Separado(a)	Todos los dias	Nunca	Nunca	Todos los dias	Todos los dias	Todos los dias	Nunca	Nunca	Nunca	Todos los dias	Una vez al mes	Una vez al mes	Una vez al mes	Todos los dias	Seis días	Siete días	Seis días	1	3	Si	Mucho más de lo normal	0 min	1-10 min	1-10 min	1-10 min	Sí	16-30 min	16-30 min	0 min	1-15 min	1-15 min	0 min	0 min	0 min	1-15 min	A menudo	A menudo	A menudo	De vez en cuando	Casi nunca	A menudo	A menudo	Nunca	A menudo	Todos los dias	Nunca
56	Mujer	27.6361	Casado(a)	Una o dos veces a la semana	Una o dos veces a la semana	Nunca	Nunca	Una o dos veces a la semana	Nunca	Una o dos veces a la semana	Nunca	Todos los dias	Una o dos veces a la semana	Una o dos veces a la semana	Una o dos veces a la semana	Todos los dias	Todos los dias	Cuatro días	Cuatro días	Cuatro días	3	1	Si	Un poco más de lo normal	16-30 min	11-20 min	21-30 min	21-30 min	Sí	16-30 min	16-30 min	0 min	1-15 min	1-15 min	0 min	0 min	1-15 min	0 min	De vez en cuando	Nunca	Casi nunca	Muy a menudo	A menudo	Casi nunca	A menudo	A menudo	Casi nunca	Una a cuatro veces por semana	Una a cuatro veces por semana
28	Hombre	24.1115	Soltero(a)	Tres a cuatro veces por semama	Una vez al mes	Una o dos veces a la semana	Una o dos veces a la semana	Una o dos veces a la semana	Dos a tres veces al mes	Una vez al mes	Una vez al mes	Todos los dias	Una o dos veces a la semana	Tres a cuatro veces por semama	Tres a cuatro veces por semama	Tres a cuatro veces por semama	Todos los dias	Siete días	Siete días	Siete días	3	1	Si	Mucho más de lo normal	0 min	1-10 min	1-10 min	1-10 min	Sí	16-30 min	16-30 min	0 min	0 min	1-15 min	0 min	0 min	0 min	1-15 min	De vez en cuando	De vez en cuando	De vez en cuando	De vez en cuando	De vez en cuando	De vez en cuando	De vez en cuando	A menudo	De vez en cuando	Una a cuatro veces por semana	Una a tres veces al mes
29	Mujer	24.0346	Soltero(a)	Una o dos veces a la semana	Una vez al mes	Nunca	Nunca	Una vez al mes	Nunca	Nunca	Una vez al mes	Todos los dias	Todos los dias	Una vez al mes	Nunca	Una vez al mes	Una o dos veces a la semana	Siete días	Siete días	Siete días	3	1	Si	Mucho más de lo normal	16-30 min	21-30 min	31-60 min	31-60 min	Sí	16-30 min	16-30 min	0 min	0 min	1-15 min	0 min	0 min	1-15 min	1-15 min	De vez en cuando	Casi nunca	Casi nunca	Muy a menudo	Muy a menudo	Casi nunca	Muy a menudo	Muy a menudo	Nunca	Una a cuatro veces por semana	Una a tres veces al mes
35	Mujer	22.2222	Soltero(a)	Todos los dias	Nunca	Una o dos veces a la semana	Una vez al mes	Dos a tres veces al mes	Dos a tres veces al mes	Una vez al mes	Una vez al mes	Todos los dias	Dos a tres veces al mes	Dos a tres veces al mes	Una vez al mes	Dos a tres veces al mes	Todos los dias	Siete días	Siete días	Siete días	3	2	No	Mucho más de lo normal	31-60 min	1-10 min	31-60 min	21-30 min	Sí	16-30 min	16-30 min	0 min	0 min	0 min	0 min	0 min	1-15 min	0 min	De vez en cuando	Casi nunca	De vez en cuando	De vez en cuando	A menudo	De vez en cuando	A menudo	A menudo	Casi nunca	Todos los dias	Nunca
25	Mujer	27.3438	Soltero(a)	Todos los dias	Nunca	Tres a cuatro veces por semama	Todos los dias	Todos los dias	Todos los dias	Tres a cuatro veces por semana	Nunca	Tres a cuatro veces por semama	Todos los dias	Todos los dias	Todos los dias	Dos a tres veces al mes	Todos los dias	Siete días	Siete días	Tres dias	2	3	Si	Mucho más de lo normal	0 min	Más de 1 h	Más de 1 h	Más de 1 h	No	16-30 min	16-30 min	0 min	1-15 min	1-15 min	0 min	0 min	1-15 min	1-15 min	A menudo	Muy a menudo	Muy a menudo	De vez en cuando	Casi nunca	A menudo	De vez en cuando	De vez en cuando	Muy a menudo	Todos los dias	Nunca
33	Mujer	40.8304	Soltero(a)	Tres a cuatro veces por semama	Nunca	Nunca	Nunca	Una vez al mes	Dos a tres veces al mes	Una o dos veces a la semana	Una vez al mes	Todos los dias	Todos los dias	Tres a cuatro veces por semama	Una o dos veces a la semana	Tres a cuatro veces por semama	Una o dos veces a la semana	Siete días	Siete días	Siete días	3	1	No	Un poco más de lo normal	31-60 min	31-60 min	Más de 1 h	Más de 1 h	Sí	16-30 min	16-30 min	0 min	1-15 min	0 min	0 min	1-15 min	1-15 min	1-15 min	De vez en cuando	A menudo	Muy a menudo	Muy a menudo	De vez en cuando	De vez en cuando	De vez en cuando	De vez en cuando	A menudo	Una a cuatro veces por semana	Nunca
23	Mujer	27.5312	Soltero(a)	Tres a cuatro veces por semama	Una o dos veces a la semana	Una o dos veces a la semana	Tres a cuatro veces por semama	Todos los dias	Todos los dias	Dos a tres veces al mes	Nunca	Tres a cuatro veces por semama	Todos los dias	Tres a cuatro veces por semama	Tres a cuatro veces por semama	Dos a tres veces al mes	Tres a cuatro veces por semama	Siete días	Siete días	Cinco días	3	2	Si	Mucho más de lo normal	31-60 min	1-10 min	11-20 min	1-10 min	Sí	16-30 min	16-30 min	0 min	1-15 min	0 min	0 min	0 min	1-15 min	0 min	De vez en cuando	A menudo	Muy a menudo	De vez en cuando	De vez en cuando	De vez en cuando	De vez en cuando	De vez en cuando	De vez en cuando	Una a cuatro veces por semana	Una a cuatro veces por semana
37	Mujer	27.6817	Soltero(a)	Tres a cuatro veces por semama	Tres a cuatro veces por semama	Tres a cuatro veces por semama	Tres a cuatro veces por semama	Todos los dias	Todos los dias	Tres a cuatro veces por semana	Dos a tres veces al mes	Todos los dias	Todos los dias	Dos a tres veces al mes	Dos a tres veces al mes	Tres a cuatro veces por semama	Tres a cuatro veces por semama	Siete días	Siete días	Siete días	3	1	No	Mucho más de lo normal	0 min	1-10 min	1-10 min	1-10 min	No	16-30 min	16-30 min	0 min	1-15 min	0 min	0 min	1-15 min	1-15 min	1-15 min	Muy a menudo	Muy a menudo	Muy a menudo	Nunca	Nunca	Muy a menudo	A menudo	Nunca	Muy a menudo	Una a cuatro veces por semana	Una a cuatro veces por semana
32	Mujer	31.2295	Soltero(a)	Todos los dias	Nunca	Nunca	Dos a tres veces al mes	Dos a tres veces al mes	Una o dos veces a la semana	Una vez al mes	Dos a tres veces al mes	Tres a cuatro veces por semama	Una o dos veces a la semana	Una o dos veces a la semana	Una vez al mes	Nunca	Todos los dias	Siete días	Siete días	Siete días	3	1	No	Mucho más de lo normal	Más de 1 hora	11-20 min	11-20 min	11-20 min	Sí	16-30 min	16-30 min	0 min	30-60 min	30-60 min	0 min	2-3 h	2-3 h	3-4 h	A menudo	A menudo	A menudo	Casi nunca	Casi nunca	Casi nunca	A menudo	De vez en cuando	De vez en cuando	Todos los dias	Nunca
24	Mujer	30.4867	Soltero(a)	Una o dos veces a la semana	Todos los dias	Dos a tres veces al mes	Dos a tres veces al mes	Todos los dias	Tres a cuatro veces por semama	Tres a cuatro veces por semana	Nunca	Dos a tres veces al mes	Todos los dias	Dos a tres veces al mes	Una vez al mes	Nunca	Todos los dias	Dos días	Siete días	Siete días	2	3	Si	Mucho más de lo normal	0 min	Más de 1 h	Más de 1 h	Más de 1 h	No	16-30 min	16-30 min	0 min	0 min	1-15 min	0 min	1-15 min	1-15 min	1-15 min	Muy a menudo	A menudo	A menudo	De vez en cuando	A menudo	De vez en cuando	A menudo	De vez en cuando	De vez en cuando	Una a cuatro veces por semana	Todos los dias
31	Mujer	36.4366	Casado(a)	Una o dos veces a la semana	Todos los dias	Tres a cuatro veces por semama	Nunca	Tres a cuatro veces por semama	Todos los dias	Una vez al mes	Una o dos veces a la semana	Todos los dias	Todos los dias	Todos los dias	Tres a cuatro veces por semama	Una o dos veces a la semana	Tres a cuatro veces por semama	Siete días	Siete días	Cinco días	1	1	Si	Un poco más de lo normal	Más de 1 hora	1-10 min	21-30 min	1-10 min	No	16-30 min	16-30 min	0 min	1-15 min	1-15 min	0 min	0 min	1-15 min	0 min	De vez en cuando	A menudo	Muy a menudo	Casi nunca	De vez en cuando	A menudo	De vez en cuando	A menudo	Casi nunca	Una a cuatro veces por semana	Todos los dias
25	Mujer	21.0772	Soltero(a)	Dos a tres veces al mes	Nunca	Nunca	Una o dos veces a la semana	Nunca	Nunca	Dos a tres veces al mes	Nunca	Todos los dias	Dos a tres veces al mes	Dos a tres veces al mes	Una vez al mes	Todos los dias	Tres a cuatro veces por semama	Cuatro días	Siete días	Siete días	3	1	No	Mucho más de lo normal	1-15 min	11-20 min	21-30 min	11-20 min	Sí	16-30 min	16-30 min	1-15 min	30-60 min	1-2 h	0 min	0 min	3-4 h	3-4 h	Casi nunca	Casi nunca	Casi nunca	Muy a menudo	A menudo	Casi nunca	A menudo	A menudo	Casi nunca	Una a tres veces al mes	Nunca
37	Mujer	27.6398	Casado(a)	Todos los dias	Nunca	Nunca	Nunca	Nunca	Nunca	Una o dos veces a la semana	Nunca	Todos los dias	Una o dos veces a la semana	Una vez al mes	Una vez al mes	Una o dos veces a la semana	Todos los dias	Siete días	Siete días	Siete días	3	2	No	Un poco más de lo normal	31-60 min	0 min	1-10 min	21-30 min	No	16-30 min	16-30 min	16-30 min	30-60 min	30-60 min	0 min	16-30 min	0 min	0 min	Casi nunca	Casi nunca	A menudo	A menudo	Muy a menudo	Casi nunca	Muy a menudo	A menudo	Casi nunca	Todos los dias	Nunca
26	Hombre	39.9146	Soltero(a)	Todos los dias	Nunca	Nunca	Nunca	Nunca	Una vez al mes	Nunca	Nunca	Todos los dias	Dos a tres veces al mes	Dos a tres veces al mes	Dos a tres veces al mes	Nunca	Todos los dias	Siete días	Siete días	Siete días	3	2	Si	Más o menos igual	0 min	21-30 min	21-30 min	11-20 min	Sí	16-30 min	16-30 min	16-30 min	0 min	1-15 min	1-15 min	1-15 min	1-15 min	0 min	De vez en cuando	De vez en cuando	De vez en cuando	A menudo	A menudo	Casi nunca	A menudo	A menudo	Casi nunca	Todos los dias	Nunca
24	Mujer	19.7239	Soltero(a)	Dos a tres veces al mes	Una o dos veces a la semana	Una vez al mes	Todos los dias	Una o dos veces a la semana	Tres a cuatro veces por semama	Nunca	Una vez al mes	Todos los dias	Una o dos veces a la semana	Una o dos veces a la semana	Una o dos veces a la semana	Todos los dias	Una o dos veces a la semana	Seis días	Siete días	Cinco días	3	1	Si	Más o menos igual	0 min	31-60 min	31-60 min	21-30 min	Sí	16-30 min	16-30 min	16-30 min	16-30 min	1-15 min	0 min	0 min	1-15 min	30-60 min	Muy a menudo	A menudo	A menudo	Casi nunca	De vez en cuando	Casi nunca	De vez en cuando	De vez en cuando	De vez en cuando	Una a tres veces al mes	Una a cuatro veces por semana
25	Mujer	31.1634	Soltero(a)	Dos a tres veces al mes	Nunca	Una vez al mes	Dos a tres veces al mes	Nunca	Una vez al mes	Nunca	Una o dos veces a la semana	Todos los dias	Dos a tres veces al mes	Tres a cuatro veces por semama	Una vez al mes	Una o dos veces a la semana	Dos a tres veces al mes	Siete días	Siete días	Siete días	3	2	No	Un poco más de lo normal	0 min	21-30 min	31-60 min	21-30 min	Sí	16-30 min	16-30 min	16-30 min	0 min	1-15 min	0 min	0 min	1-15 min	1-15 min	Casi nunca	Casi nunca	Casi nunca	A menudo	Muy a menudo	Casi nunca	Muy a menudo	Nunca	Nunca	Una a tres veces al mes	Nunca
24	Mujer	27.7344	Soltero(a)	Una o dos veces a la semana	Nunca	Nunca	Todos los dias	Dos a tres veces al mes	Todos los dias	Dos a tres veces al mes	Nunca	Todos los dias	Todos los dias	Tres a cuatro veces por semama	Todos los dias	Una o dos veces a la semana	Todos los dias	Cuatro días	Cuatro días	Cuatro días	3	1	Si	Mucho más de lo normal	16-30 min	21-30 min	21-30 min	21-30 min	Sí	16-30 min	16-30 min	16-30 min	2-3 h	2-3 h	1-2 h	1-2 h	30-60 min	2-3 h	A menudo	A menudo	A menudo	De vez en cuando	De vez en cuando	A menudo	De vez en cuando	De vez en cuando	A menudo	Una a cuatro veces por semana	Nunca
27	Mujer	28.3531	Soltero(a)	Una o dos veces a la semana	Nunca	Una o dos veces a la semana	Nunca	Dos a tres veces al mes	Dos a tres veces al mes	Dos a tres veces al mes	Una vez al mes	Todos los dias	Todos los dias	Una o dos veces a la semana	Una o dos veces a la semana	Dos a tres veces al mes	Tres a cuatro veces por semama	Siete días	Siete días	Siete días	3	1	Si	Un poco más de lo normal	1-15 min	1-10 min	11-20 min	11-20 min	Sí	16-30 min	16-30 min	16-30 min	0 min	1-15 min	0 min	0 min	1-15 min	1-15 min	Nunca	Casi nunca	Casi nunca	Muy a menudo	A menudo	Nunca	A menudo	Muy a menudo	Casi nunca	Una a cuatro veces por semana	Nunca
32	Mujer	21.1927	Soltero(a)	Una o dos veces a la semana	Una o dos veces a la semana	Dos a tres veces al mes	Dos a tres veces al mes	Una vez al mes	Nunca	Todos los dias	Dos a tres veces al mes	Todos los dias	Todos los dias	Una o dos veces a la semana	Una o dos veces a la semana	Una o dos veces a la semana	Nunca	Cinco días	Siete días	Cuatro días	2	1	Si	Un poco más de lo normal	16-30 min	11-20 min	Más de 1 h	11-20 min	Sí	16-30 min	16-30 min	16-30 min	1-15 min	1-15 min	0 min	0 min	1-15 min	1-15 min	A menudo	De vez en cuando	Muy a menudo	A menudo	De vez en cuando	De vez en cuando	De vez en cuando	De vez en cuando	De vez en cuando	Una a cuatro veces por semana	Una a cuatro veces por semana
41	Mujer	26.8352	Casado(a)	Dos a tres veces al mes	Nunca	Nunca	Tres a cuatro veces por semama	Tres a cuatro veces por semama	Una vez al mes	Una vez al mes	Nunca	Todos los dias	Nunca	Tres a cuatro veces por semama	Tres a cuatro veces por semama	Una o dos veces a la semana	Todos los dias	Dos días	Siete días	Siete días	2	3	Si	Mucho más de lo normal	16-30 min	1-10 min	1-10 min	1-10 min	No	16-30 min	16-30 min	16-30 min	0 min	1-15 min	0 min	0 min	1-15 min	0 min	Muy a menudo	Muy a menudo	A menudo	A menudo	De vez en cuando	Muy a menudo	De vez en cuando	De vez en cuando	A menudo	Una a tres veces al mes	Nunca
71	Hombre	27.3438	Casado(a)	Nunca	Una vez al mes	Una vez al mes	Una o dos veces a la semana	Nunca	Nunca	Una vez al mes	Nunca	Una o dos veces a la semana	Nunca	Nunca	Dos a tres veces al mes	Una vez al mes	Todos los dias	Cinco días	Siete días	Tres dias	2	0	Si	Un poco menos de lo normal	16-30 min	21-30 min	31-60 min	11-20 min	Sí	16-30 min	16-30 min	16-30 min	30-60 min	1-2 h	0 min	3-4 h	3-4 h	2-3 h	Casi nunca	Nunca	De vez en cuando	A menudo	A menudo	Casi nunca	A menudo	A menudo	Casi nunca	Nunca	Una a tres veces al mes
31	Mujer	27.7008	Casado(a)	Tres a cuatro veces por semama	Dos a tres veces al mes	Una o dos veces a la semana	Una o dos veces a la semana	Una o dos veces a la semana	Todos los dias	Una o dos veces a la semana	Dos a tres veces al mes	Todos los dias	Nunca	Una o dos veces a la semana	Una o dos veces a la semana	Dos a tres veces al mes	Todos los dias	Cuatro días	Siete días	Siete días	1	1	No	Mucho menos de lo normal	Más de 1 hora	1-10 min	11-20 min	11-20 min	No	16-30 min	16-30 min	16-30 min	1-15 min	1-15 min	0 min	0 min	1-15 min	1-15 min	De vez en cuando	De vez en cuando	A menudo	A menudo	A menudo	Nunca	Muy a menudo	A menudo	Nunca	Una a cuatro veces por semana	Una a tres veces al mes
19	Mujer	23.4221	Soltero(a)	Tres a cuatro veces por semama	Una vez al mes	Una vez al mes	Una vez al mes	Dos a tres veces al mes	Dos a tres veces al mes	Una vez al mes	Una vez al mes	Todos los dias	Una o dos veces a la semana	Una o dos veces a la semana	Una o dos veces a la semana	Todos los dias	Tres a cuatro veces por semama	Siete días	Siete días	Siete días	3	1	Si	Un poco más de lo normal	16-30 min	11-20 min	21-30 min	21-30 min	Sí	16-30 min	16-30 min	30-60 min	2-3 h	1-15 min	16-30 min	0 min	30-60 min	3-4 h	A menudo	A menudo	Muy a menudo	De vez en cuando	De vez en cuando	A menudo	De vez en cuando	De vez en cuando	A menudo	Una a cuatro veces por semana	Una a tres veces al mes
41	Mujer	19.8141	Casado(a)	Dos a tres veces al mes	Nunca	Nunca	Nunca	Nunca	Nunca	Dos a tres veces al mes	Nunca	Todos los dias	Una o dos veces a la semana	Dos a tres veces al mes	Dos a tres veces al mes	Dos a tres veces al mes	Todos los dias	Siete días	Siete días	Cuatro días	3	0	Si	Un poco más de lo normal	0 min	21-30 min	31-60 min	31-60 min	Sí	16-30 min	2-3 h	0 min	16-30 min	16-30 min	1-15 min	30-60 min	0 min	0 min	Casi nunca	Nunca	De vez en cuando	Muy a menudo	Muy a menudo	Casi nunca	A menudo	A menudo	Casi nunca	Una a tres veces al mes	Nunca
27	Mujer	27.4348	Soltero(a)	Una o dos veces a la semana	Nunca	Dos a tres veces al mes	Una o dos veces a la semana	Dos a tres veces al mes	Una o dos veces a la semana	Una vez al mes	Nunca	Todos los dias	Dos a tres veces al mes	Dos a tres veces al mes	Dos a tres veces al mes	Nunca	Todos los dias	Siete días	Seis días	Siete días	3	0	Si	Un poco más de lo normal	0 min	Más de 1 h	Más de 1 h	Más de 1 h	Sí	16-30 min	2-3 h	0 min	30-60 min	16-30 min	0 min	0 min	30-60 min	0 min	Casi nunca	A menudo	Casi nunca	De vez en cuando	De vez en cuando	De vez en cuando	A menudo	De vez en cuando	De vez en cuando	Una a cuatro veces por semana	Nunca
22	Mujer	27.0051	Soltero(a)	Tres a cuatro veces por semama	Todos los dias	Todos los dias	Dos a tres veces al mes	Tres a cuatro veces por semama	Tres a cuatro veces por semama	Una vez al mes	Nunca	Todos los dias	Todos los dias	Todos los dias	Una o dos veces a la semana	Dos a tres veces al mes	Todos los dias	Tres dias	Siete días	Seis días	3	3	Si	Un poco más de lo normal	0 min	11-20 min	21-30 min	21-30 min	Sí	16-30 min	2-3 h	0 min	0 min	1-15 min	0 min	0 min	2-3 h	0 min	De vez en cuando	De vez en cuando	A menudo	A menudo	De vez en cuando	A menudo	De vez en cuando	De vez en cuando	A menudo	Una a cuatro veces por semana	Todos los dias
20	Mujer	25.6369	Soltero(a)	Una o dos veces a la semana	Tres a cuatro veces por semama	Dos a tres veces al mes	Dos a tres veces al mes	Una o dos veces a la semana	Tres a cuatro veces por semama	Dos a tres veces al mes	Dos a tres veces al mes	Todos los dias	Tres a cuatro veces por semama	Una o dos veces a la semana	Una o dos veces a la semana	Dos a tres veces al mes	Tres a cuatro veces por semama	Seis días	Siete días	Siete días	3	1	Si	Un poco más de lo normal	16-30 min	11-20 min	21-30 min	31-60 min	No	16-30 min	2-3 h	0 min	30-60 min	3-4 h	2-3 h	1-15 min	1-2 h	1-2 h	A menudo	De vez en cuando	A menudo	A menudo	A menudo	De vez en cuando	A menudo	A menudo	De vez en cuando	Una a cuatro veces por semana	Una a cuatro veces por semana
23	Mujer	21.2279	Soltero(a)	Tres a cuatro veces por semama	Nunca	Dos a tres veces al mes	Una vez al mes	Nunca	Nunca	Una vez al mes	Dos a tres veces al mes	Todos los dias	Dos a tres veces al mes	Una o dos veces a la semana	Una vez al mes	Todos los dias	Todos los dias	Seis días	Siete días	Siete días	3	1	No	Mucho más de lo normal	0 min	11-20 min	21-30 min	11-20 min	Sí	16-30 min	3-4 h	0 min	30-60 min	16-30 min	0 min	0 min	30-60 min	0 min	De vez en cuando	Casi nunca	De vez en cuando	A menudo	A menudo	De vez en cuando	A menudo	A menudo	Nunca	Una a cuatro veces por semana	Nunca
32	Mujer	24.6094	Soltero(a)	Una o dos veces a la semana	Nunca	Dos a tres veces al mes	Dos a tres veces al mes	Una vez al mes	Nunca	Una vez al mes	Nunca	Todos los dias	Dos a tres veces al mes	Una vez al mes	Dos a tres veces al mes	Una o dos veces a la semana	Todos los dias	Siete días	Siete días	Siete días	3	1	Si	Un poco más de lo normal	0 min	21-30 min	31-60 min	21-30 min	Sí	16-30 min	3-4 h	0 min	30-60 min	1-2 h	16-30 min	0 min	16-30 min	30-60 min	De vez en cuando	De vez en cuando	De vez en cuando	A menudo	De vez en cuando	Casi nunca	A menudo	A menudo	De vez en cuando	Una a cuatro veces por semana	Nunca
58	Mujer	17.301	Casado(a)	Todos los dias	Nunca	Dos a tres veces al mes	Nunca	Nunca	Nunca	Nunca	Nunca	Todos los dias	Dos a tres veces al mes	Todos los dias	Una vez al mes	Todos los dias	Todos los dias	Siete días	Siete días	Cuatro días	3	1	No	Un poco más de lo normal	Más de 1 hora	1-10 min	31-60 min	1-10 min	Sí	16-30 min	3-4 h	0 min	16-30 min	16-30 min	0 min	3-4 h	16-30 min	2-3 h	De vez en cuando	De vez en cuando	De vez en cuando	A menudo	A menudo	De vez en cuando	A menudo	Casi nunca	De vez en cuando	Todos los dias	Nunca
34	Mujer	21.7079	Casado(a)	Una o dos veces a la semana	Tres a cuatro veces por semama	Una vez al mes	Dos a tres veces al mes	Tres a cuatro veces por semama	Una vez al mes	Una vez al mes	Nunca	Todos los dias	Tres a cuatro veces por semama	Tres a cuatro veces por semama	Dos a tres veces al mes	Todos los dias	Dos a tres veces al mes	Seis días	Siete días	Un dia	1	1	Si	Más o menos igual	0 min	21-30 min	31-60 min	0 min	Sí	16-30 min	3-4 h	0 min	2-3 h	3-4 h	0 min	1-2 h	3-4 h	0 min	De vez en cuando	Casi nunca	Casi nunca	Muy a menudo	Muy a menudo	Casi nunca	Muy a menudo	Muy a menudo	Nunca	Una a cuatro veces por semana	Una a cuatro veces por semana
22	Mujer	23.1206	Soltero(a)	Una o dos veces a la semana	Tres a cuatro veces por semama	Una vez al mes	Una vez al mes	Nunca	Nunca	Una vez al mes	Una vez al mes	Todos los dias	Una o dos veces a la semana	Dos a tres veces al mes	Una vez al mes	Dos a tres veces al mes	Tres a cuatro veces por semama	Seis días	Siete días	Cinco días	3	2	Si	Un poco más de lo normal	31-60 min	21-30 min	21-30 min	11-20 min	Sí	16-30 min	30-60 min	0 min	3-4 h	16-30 min	2-3 h	1-15 min	1-2 h	2-3 h	A menudo	De vez en cuando	A menudo	De vez en cuando	De vez en cuando	A menudo	A menudo	De vez en cuando	De vez en cuando	Una a cuatro veces por semana	Una a cuatro veces por semana
41	Mujer	21.0938	Soltero(a)	Todos los dias	Nunca	Dos a tres veces al mes	Una o dos veces a la semana	Una vez al mes	Nunca	Nunca	Tres a cuatro veces por semama	Todos los dias	Una vez al mes	Una o dos veces a la semana	Una vez al mes	Todos los dias	Todos los dias	Siete días	Siete días	Un dia	2	2	Si	Mucho menos de lo normal	0 min	11-20 min	21-30 min	1-10 min	Sí	16-30 min	30-60 min	0 min	0 min	0 min	0 min	0 min	1-15 min	0 min	De vez en cuando	De vez en cuando	De vez en cuando	A menudo	A menudo	De vez en cuando	A menudo	A menudo	De vez en cuando	Todos los dias	Nunca
40	Mujer	25.1532	Casado(a)	Una o dos veces a la semana	Una vez al mes	Nunca	Nunca	Nunca	Nunca	Una vez al mes	Nunca	Todos los dias	Dos a tres veces al mes	Dos a tres veces al mes	Una vez al mes	Tres a cuatro veces por semama	Todos los dias	Siete días	Siete días	Cuatro días	3	1	Si	Más o menos igual	0 min	11-20 min	11-20 min	11-20 min	Sí	16-30 min	30-60 min	0 min	30-60 min	2-3 h	16-30 min	16-30 min	0 min	1-15 min	De vez en cuando	De vez en cuando	A menudo	A menudo	A menudo	De vez en cuando	Muy a menudo	A menudo	Casi nunca	Una a cuatro veces por semana	Una a tres veces al mes
41	Mujer	25.3906	Separado(a)	Tres a cuatro veces por semama	Nunca	Dos a tres veces al mes	Nunca	Dos a tres veces al mes	Una vez al mes	Dos a tres veces al mes	Nunca	Todos los dias	Todos los dias	Todos los dias	Dos a tres veces al mes	Todos los dias	Tres a cuatro veces por semama	Siete días	Siete días	Siete días	3	2	Si	Mucho más de lo normal	0 min	11-20 min	11-20 min	11-20 min	Sí	16-30 min	30-60 min	0 min	16-30 min	0 min	16-30 min	16-30 min	16-30 min	16-30 min	De vez en cuando	Casi nunca	De vez en cuando	Muy a menudo	De vez en cuando	De vez en cuando	Muy a menudo	Muy a menudo	Casi nunca	Una a cuatro veces por semana	Nunca
56	Hombre	23.6203	Casado(a)	Una o dos veces a la semana	Una vez al mes	Nunca	Nunca	Nunca	Nunca	Nunca	Dos a tres veces al mes	Dos a tres veces al mes	Dos a tres veces al mes	Una o dos veces a la semana	Una vez al mes	Una o dos veces a la semana	Todos los dias	Un dia	Un dia	Dos días	3	2	Si	Más o menos igual	16-30 min	11-20 min	21-30 min	11-20 min	Sí	16-30 min	30-60 min	0 min	16-30 min	16-30 min	0 min	0 min	16-30 min	1-15 min	De vez en cuando	Casi nunca	Casi nunca	Muy a menudo	A menudo	Casi nunca	Muy a menudo	A menudo	Casi nunca	Una a cuatro veces por semana	Una a tres veces al mes
18	Mujer	23.1473	Soltero(a)	Una o dos veces a la semana	Una o dos veces a la semana	Una o dos veces a la semana	Dos a tres veces al mes	Todos los dias	Todos los dias	Una vez al mes	Una vez al mes	Todos los dias	Todos los dias	Una o dos veces a la semana	Una vez al mes	Dos a tres veces al mes	Todos los dias	Siete días	Siete días	Cuatro días	2	1	Si	Mucho más de lo normal	0 min	21-30 min	21-30 min	21-30 min	Sí	16-30 min	30-60 min	0 min	30-60 min	1-15 min	0 min	1-15 min	1-15 min	2-3 h	De vez en cuando	Casi nunca	A menudo	A menudo	De vez en cuando	De vez en cuando	Muy a menudo	A menudo	De vez en cuando	Una a cuatro veces por semana	Una a cuatro veces por semana
50	Mujer	28.125	Soltero(a)	Nunca	Nunca	Nunca	Nunca	Nunca	Nunca	Una vez al mes	Nunca	Todos los dias	Una o dos veces a la semana	Una o dos veces a la semana	Dos a tres veces al mes	Todos los dias	Todos los dias	Siete días	Siete días	Siete días	2	0	No	Un poco menos de lo normal	0 min	21-30 min	21-30 min	21-30 min	Sí	2-3 h	1-2 h	0 min	30-60 min	3-4 h	3-4 h	16-30 min	3-4 h	2-3 h	De vez en cuando	De vez en cuando	De vez en cuando	A menudo	A menudo	De vez en cuando	A menudo	A menudo	Casi nunca	Nunca	Nunca
28	Mujer	23.4375	Soltero(a)	Una o dos veces a la semana	Nunca	Nunca	Una vez al mes	Dos a tres veces al mes	Nunca	Una o dos veces a la semana	Nunca	Todos los dias	Una o dos veces a la semana	Una vez al mes	Una o dos veces a la semana	Una o dos veces a la semana	Todos los dias	Siete días	Siete días	Siete días	3	2	Si	Mucho más de lo normal	16-30 min	21-30 min	21-30 min	21-30 min	Sí	2-3 h	1-2 h	0 min	0 min	30-60 min	0 min	0 min	1-2 h	0 min	De vez en cuando	De vez en cuando	De vez en cuando	Muy a menudo	A menudo	Casi nunca	Muy a menudo	A menudo	Casi nunca	Una a cuatro veces por semana	Nunca
74	Mujer	31.9805	Casado(a)	Dos a tres veces al mes	Nunca	Nunca	Nunca	Nunca	Nunca	Dos a tres veces al mes	Nunca	Todos los dias	Una o dos veces a la semana	Dos a tres veces al mes	Dos a tres veces al mes	Una o dos veces a la semana	Todos los dias	Siete días	Siete días	Un dia	2	2	Si	Un poco menos de lo normal	0 min	1-10 min	11-20 min	0 min	No	2-3 h	1-2 h	0 min	0 min	1-2 h	0 min	30-60 min	30-60 min	0 min	De vez en cuando	Nunca	De vez en cuando	A menudo	A menudo	De vez en cuando	A menudo	A menudo	Nunca	Una a tres veces al mes	Nunca
38	Hombre	26.1224	Casado(a)	Todos los dias	Nunca	Dos a tres veces al mes	Tres a cuatro veces por semama	Nunca	Una o dos veces a la semana	Dos a tres veces al mes	Dos a tres veces al mes	Todos los dias	Tres a cuatro veces por semama	Dos a tres veces al mes	Dos a tres veces al mes	Dos a tres veces al mes	Todos los dias	Siete días	Siete días	Siete días	3	2	No	Un poco menos de lo normal	31-60 min	11-20 min	11-20 min	11-20 min	No	2-3 h	1-2 h	0 min	16-30 min	2-3 h	3-4 h	0 min	1-2 h	0 min	De vez en cuando	De vez en cuando	De vez en cuando	Muy a menudo	A menudo	De vez en cuando	Muy a menudo	De vez en cuando	De vez en cuando	Todos los dias	Nunca
23	Mujer	22.4323	Soltero(a)	Una o dos veces a la semana	Nunca	Nunca	Una o dos veces a la semana	Una o dos veces a la semana	Una o dos veces a la semana	Nunca	Nunca	Todos los dias	Todos los dias	Dos a tres veces al mes	Dos a tres veces al mes	Tres a cuatro veces por semama	Todos los dias	Siete días	Siete días	Siete días	3	1	Si	Mucho más de lo normal	0 min	11-20 min	11-20 min	11-20 min	No	2-3 h	1-2 h	0 min	0 min	0 min	0 min	0 min	16-30 min	3-4 h	De vez en cuando	Casi nunca	De vez en cuando	A menudo	A menudo	Casi nunca	A menudo	A menudo	Casi nunca	Una a cuatro veces por semana	Nunca
33	Mujer	40	Casado(a)	Tres a cuatro veces por semama	Nunca	Una o dos veces a la semana	Dos a tres veces al mes	Todos los dias	Todos los dias	Una vez al mes	Nunca	Tres a cuatro veces por semama	Todos los dias	Una o dos veces a la semana	Todos los dias	Tres a cuatro veces por semama	Todos los dias	Siete días	Siete días	Siete días	3	1	Si	Un poco más de lo normal	31-60 min	11-20 min	11-20 min	11-20 min	Sí	2-3 h	1-2 h	0 min	0 min	2-3 h	0 min	1-15 min	16-30 min	0 min	Muy a menudo	A menudo	A menudo	A menudo	De vez en cuando	De vez en cuando	A menudo	A menudo	De vez en cuando	Una a cuatro veces por semana	Nunca
38	Mujer	27.4714	Separado(a)	Todos los dias	Nunca	Una o dos veces a la semana	Una o dos veces a la semana	Una o dos veces a la semana	Una o dos veces a la semana	Nunca	Nunca	Todos los dias	Todos los dias	Todos los dias	Dos a tres veces al mes	Tres a cuatro veces por semama	Todos los dias	Siete días	Siete días	Siete días	3	2	No	Más o menos igual	0 min	21-30 min	21-30 min	21-30 min	No	2-3 h	1-2 h	0 min	16-30 min	30-60 min	30-60 min	0 min	0 min	0 min	Casi nunca	Nunca	Casi nunca	A menudo	A menudo	Casi nunca	Muy a menudo	Muy a menudo	Nunca	Todos los dias	Nunca
34	Mujer	23.4375	Soltero(a)	Tres a cuatro veces por semama	Dos a tres veces al mes	Una o dos veces a la semana	Una o dos veces a la semana	Dos a tres veces al mes	Dos a tres veces al mes	Una vez al mes	Dos a tres veces al mes	Todos los dias	Una o dos veces a la semana	Dos a tres veces al mes	Una vez al mes	Dos a tres veces al mes	Todos los dias	Siete días	Siete días	Cuatro días	2	2	Si	Un poco más de lo normal	0 min	31-60 min	31-60 min	21-30 min	Sí	2-3 h	1-2 h	0 min	1-15 min	2-3 h	0 min	16-30 min	3-4 h	0 min	De vez en cuando	De vez en cuando	De vez en cuando	Casi nunca	De vez en cuando	A menudo	A menudo	De vez en cuando	De vez en cuando	Una a cuatro veces por semana	Una a tres veces al mes
39	Mujer	32.0461	Casado(a)	Tres a cuatro veces por semama	Una o dos veces a la semana	Una vez al mes	Nunca	Todos los dias	Todos los dias	Dos a tres veces al mes	Una vez al mes	Todos los dias	Todos los dias	Una o dos veces a la semana	Una o dos veces a la semana	Todos los dias	Todos los dias	Siete días	Siete días	Cinco días	3	1	Si	Más o menos igual	31-60 min	11-20 min	21-30 min	1-10 min	Sí	2-3 h	1-2 h	0 min	0 min	30-60 min	1-15 min	0 min	0 min	30-60 min	De vez en cuando	Casi nunca	De vez en cuando	A menudo	A menudo	De vez en cuando	A menudo	A menudo	De vez en cuando	Una a cuatro veces por semana	Una a cuatro veces por semana
35	Mujer	29.6158	Soltero(a)	Una o dos veces a la semana	Nunca	Nunca	Nunca	Nunca	Nunca	Nunca	Nunca	Todos los dias	Todos los dias	Una o dos veces a la semana	Una o dos veces a la semana	Una o dos veces a la semana	Todos los dias	Seis días	Seis días	Cinco días	2	1	No	Mucho más de lo normal	0 min	21-30 min	21-30 min	21-30 min	Sí	2-3 h	1-2 h	0 min	0 min	30-60 min	0 min	0 min	3-4 h	3-4 h	A menudo	Casi nunca	Muy a menudo	Casi nunca	A menudo	Casi nunca	A menudo	De vez en cuando	Casi nunca	Una a cuatro veces por semana	Nunca
26	Mujer	23.1473	Soltero(a)	Nunca	Nunca	Nunca	Nunca	Nunca	Nunca	Una o dos veces a la semana	Nunca	Todos los dias	Una o dos veces a la semana	Una o dos veces a la semana	Dos a tres veces al mes	Tres a cuatro veces por semama	Tres a cuatro veces por semama	Tres dias	Siete días	Siete días	3	1	Si	Mucho más de lo normal	16-30 min	21-30 min	Más de 1 h	Más de 1 h	Sí	2-3 h	1-2 h	0 min	0 min	0 min	0 min	0 min	16-30 min	0 min	A menudo	Muy a menudo	Muy a menudo	De vez en cuando	De vez en cuando	De vez en cuando	De vez en cuando	Casi nunca	De vez en cuando	Nunca	Nunca
32	Hombre	19.5313	Soltero(a)	Nunca	Nunca	Nunca	Nunca	Nunca	Nunca	Dos a tres veces al mes	Dos a tres veces al mes	Todos los dias	Nunca	Nunca	Nunca	Una o dos veces a la semana	Todos los dias	Siete días	Siete días	Siete días	4	3	No	Más o menos igual	Más de 1 hora	Más de 1 h	Más de 1 h	Más de 1 h	No	2-3 h	1-2 h	0 min	0 min	0 min	0 min	1-15 min	30-60 min	0 min	Nunca	Nunca	De vez en cuando	De vez en cuando	A menudo	De vez en cuando	A menudo	De vez en cuando	De vez en cuando	Nunca	Nunca
40	Hombre	29.0606	Soltero(a)	Todos los dias	Una vez al mes	Una vez al mes	Tres a cuatro veces por semama	Una o dos veces a la semana	Nunca	Dos a tres veces al mes	Una vez al mes	Dos a tres veces al mes	Una o dos veces a la semana	Una o dos veces a la semana	Dos a tres veces al mes	Una vez al mes	Nunca	Seis días	Seis días	Siete días	2	2	No	Un poco menos de lo normal	1-15 min	1-10 min	31-60 min	1-10 min	Sí	2-3 h	1-2 h	0 min	0 min	0 min	0 min	0 min	0 min	0 min	Muy a menudo	A menudo	A menudo	De vez en cuando	De vez en cuando	Casi nunca	A menudo	A menudo	De vez en cuando	Todos los dias	Una a tres veces al mes
60	Hombre	29.7527	Separado(a)	Una vez al mes	Nunca	Nunca	Una vez al mes	Una vez al mes	Una vez al mes	Una vez al mes	Nunca	Todos los dias	Una vez al mes	Nunca	Una vez al mes	Todos los dias	Todos los dias	Siete días	Siete días	Siete días	2	0	No	Más o menos igual	16-30 min	21-30 min	21-30 min	21-30 min	Sí	2-3 h	1-2 h	1-2 h	30-60 min	16-30 min	30-60 min	30-60 min	1-2 h	1-2 h	A menudo	De vez en cuando	De vez en cuando	A menudo	A menudo	De vez en cuando	A menudo	De vez en cuando	Casi nunca	Una a tres veces al mes	Nunca
52	Mujer	25.9701	Casado(a)	Todos los dias	Dos a tres veces al mes	Nunca	Una o dos veces a la semana	Dos a tres veces al mes	Nunca	Una vez al mes	Nunca	Todos los dias	Todos los dias	Dos a tres veces al mes	Una vez al mes	Una o dos veces a la semana	Todos los dias	Siete días	Siete días	Dos días	3	2	Si	Un poco más de lo normal	31-60 min	21-30 min	11-20 min	1-10 min	No	2-3 h	1-2 h	16-30 min	0 min	16-30 min	0 min	30-60 min	0 min	30-60 min	A menudo	De vez en cuando	De vez en cuando	A menudo	A menudo	Casi nunca	A menudo	A menudo	De vez en cuando	Todos los dias	Una a tres veces al mes
23	Mujer	35.1563	Soltero(a)	Todos los dias	Nunca	Tres a cuatro veces por semama	Tres a cuatro veces por semama	Todos los dias	Todos los dias	Una o dos veces a la semana	Nunca	Todos los dias	Todos los dias	Una o dos veces a la semana	Dos a tres veces al mes	Todos los dias	Tres a cuatro veces por semama	Siete días	Siete días	Siete días	3	3	No	Un poco más de lo normal	16-30 min	11-20 min	21-30 min	11-20 min	Sí	2-3 h	16-30 min	0 min	0 min	30-60 min	0 min	0 min	3-4 h	0 min	De vez en cuando	Muy a menudo	Muy a menudo	De vez en cuando	Casi nunca	De vez en cuando	De vez en cuando	De vez en cuando	De vez en cuando	Todos los dias	Nunca
37	Mujer	37.8072	Casado(a)	Todos los dias	Nunca	Nunca	Nunca	Todos los dias	Todos los dias	Una o dos veces a la semana	Nunca	Todos los dias	Todos los dias	Una o dos veces a la semana	Tres a cuatro veces por semama	Tres a cuatro veces por semama	Todos los dias	Siete días	Siete días	Tres dias	2	0	No	Mucho más de lo normal	16-30 min	11-20 min	21-30 min	21-30 min	No	2-3 h	16-30 min	0 min	1-2 h	3-4 h	3-4 h	30-60 min	1-2 h	0 min	De vez en cuando	De vez en cuando	De vez en cuando	De vez en cuando	A menudo	De vez en cuando	A menudo	A menudo	De vez en cuando	Todos los dias	Nunca
36	Mujer	27.6095	Casado(a)	Tres a cuatro veces por semama	Nunca	Nunca	Nunca	Una vez al mes	Una vez al mes	Nunca	Nunca	Todos los dias	Tres a cuatro veces por semama	Dos a tres veces al mes	Una vez al mes	Una vez al mes	Todos los dias	Siete días	Siete días	Siete días	3	3	Si	Mucho menos de lo normal	0 min	11-20 min	11-20 min	11-20 min	No	2-3 h	16-30 min	0 min	0 min	0 min	1-15 min	0 min	0 min	0 min	Casi nunca	Casi nunca	Muy a menudo	Muy a menudo	Muy a menudo	De vez en cuando	Muy a menudo	Muy a menudo	Casi nunca	Una a cuatro veces por semana	Nunca
27	Mujer	25.711	Soltero(a)	Todos los dias	Nunca	Tres a cuatro veces por semama	Tres a cuatro veces por semama	Tres a cuatro veces por semama	Tres a cuatro veces por semama	Una o dos veces a la semana	Una o dos veces a la semana	Todos los dias	Tres a cuatro veces por semama	Tres a cuatro veces por semama	Tres a cuatro veces por semama	Dos a tres veces al mes	Todos los dias	Siete días	Siete días	Siete días	3	2	Si	Mucho más de lo normal	0 min	21-30 min	21-30 min	21-30 min	No	2-3 h	16-30 min	30-60 min	16-30 min	16-30 min	16-30 min	16-30 min	30-60 min	16-30 min	De vez en cuando	De vez en cuando	A menudo	A menudo	De vez en cuando	De vez en cuando	De vez en cuando	De vez en cuando	Casi nunca	Todos los dias	Nunca
21	Mujer	22.8374	Soltero(a)	Tres a cuatro veces por semama	Todos los dias	Nunca	Una vez al mes	Una vez al mes	Nunca	Una vez al mes	Nunca	Todos los dias	Tres a cuatro veces por semama	Dos a tres veces al mes	Dos a tres veces al mes	Una vez al mes	Todos los dias	Cinco días	Siete días	Siete días	3	0	Si	Más o menos igual	31-60 min	11-20 min	21-30 min	21-30 min	Sí	2-3 h	2-3 h	0 min	0 min	0 min	0 min	0 min	0 min	0 min	De vez en cuando	Casi nunca	De vez en cuando	De vez en cuando	Muy a menudo	Casi nunca	Muy a menudo	A menudo	De vez en cuando	Una a cuatro veces por semana	Todos los dias
52	Mujer	41.2071	Casado(a)	Tres a cuatro veces por semama	Nunca	Nunca	Nunca	Nunca	Nunca	Nunca	Nunca	Todos los dias	Todos los dias	Una o dos veces a la semana	Dos a tres veces al mes	Dos a tres veces al mes	Todos los dias	Siete días	Siete días	Siete días	3	2	Si	Más o menos igual	0 min	31-60 min	31-60 min	31-60 min	Sí	2-3 h	2-3 h	0 min	16-30 min	1-2 h	0 min	0 min	0 min	2-3 h	De vez en cuando	Nunca	De vez en cuando	Muy a menudo	Casi nunca	De vez en cuando	Muy a menudo	A menudo	Nunca	Una a cuatro veces por semana	Nunca
27	Hombre	23.939	Soltero(a)	Una o dos veces a la semana	Dos a tres veces al mes	Una vez al mes	Nunca	Nunca	Una vez al mes	Una vez al mes	Nunca	Todos los dias	Dos a tres veces al mes	Dos a tres veces al mes	Una vez al mes	Nunca	Todos los dias	Cinco días	Siete días	Siete días	3	0	Si	Más o menos igual	31-60 min	21-30 min	21-30 min	21-30 min	Sí	2-3 h	2-3 h	0 min	16-30 min	16-30 min	0 min	2-3 h	30-60 min	0 min	Casi nunca	De vez en cuando	De vez en cuando	A menudo	A menudo	Casi nunca	A menudo	A menudo	Casi nunca	Una a cuatro veces por semana	Una a tres veces al mes
19	Mujer	23.4375	Soltero(a)	Tres a cuatro veces por semama	Nunca	Una vez al mes	Dos a tres veces al mes	Nunca	Nunca	Una o dos veces a la semana	Nunca	Todos los dias	Dos a tres veces al mes	Todos los dias	Dos a tres veces al mes	Nunca	Todos los dias	Tres dias	Siete días	Siete días	2	3	No	Un poco más de lo normal	0 min	11-20 min	21-30 min	11-20 min	Sí	2-3 h	2-3 h	0 min	0 min	1-2 h	0 min	0 min	1-2 h	30-60 min	Casi nunca	De vez en cuando	Casi nunca	Casi nunca	Muy a menudo	De vez en cuando	A menudo	A menudo	Nunca	Una a cuatro veces por semana	Nunca
58	Hombre	26.5118	Casado(a)	Tres a cuatro veces por semama	Una o dos veces a la semana	Nunca	Una o dos veces a la semana	Nunca	Nunca	Nunca	Nunca	Todos los dias	Una o dos veces a la semana	Una o dos veces a la semana	Nunca	Todos los dias	Todos los dias	Siete días	Siete días	Siete días	3	1	No	Más o menos igual	0 min	21-30 min	21-30 min	21-30 min	Sí	2-3 h	2-3 h	0 min	30-60 min	30-60 min	0 min	0 min	0 min	0 min	Casi nunca	Casi nunca	De vez en cuando	A menudo	A menudo	De vez en cuando	A menudo	A menudo	De vez en cuando	Una a cuatro veces por semana	Una a cuatro veces por semana
21	Mujer	22.4323	Soltero(a)	Tres a cuatro veces por semama	Tres a cuatro veces por semama	Una vez al mes	Una o dos veces a la semana	Una vez al mes	Una vez al mes	Nunca	Nunca	Todos los dias	Dos a tres veces al mes	Todos los dias	Nunca	Una vez al mes	Todos los dias	Siete días	Siete días	Siete días	5	2	Si	Un poco más de lo normal	31-60 min	11-20 min	11-20 min	11-20 min	Sí	2-3 h	2-3 h	0 min	0 min	16-30 min	0 min	0 min	0 min	0 min	Muy a menudo	Casi nunca	Muy a menudo	De vez en cuando	Casi nunca	De vez en cuando	De vez en cuando	De vez en cuando	A menudo	Una a cuatro veces por semana	Una a cuatro veces por semana
51	Hombre	23.6669	Casado(a)	Nunca	Todos los dias	Una vez al mes	Nunca	Nunca	Nunca	Tres a cuatro veces por semana	Una vez al mes	Todos los dias	Dos a tres veces al mes	Nunca	Una vez al mes	Todos los dias	Todos los dias	Un dia	Siete días	Siete días	2	1	Si	Un poco más de lo normal	16-30 min	0 min	21-30 min	21-30 min	Sí	2-3 h	2-3 h	0 min	16-30 min	0 min	0 min	30-60 min	16-30 min	0 min	De vez en cuando	Nunca	Casi nunca	A menudo	Muy a menudo	Casi nunca	Muy a menudo	A menudo	Nunca	Nunca	Todos los dias
55	Mujer	26.7094	Casado(a)	Todos los dias	Nunca	Dos a tres veces al mes	Todos los dias	Todos los dias	Tres a cuatro veces por semama	Tres a cuatro veces por semana	Nunca	Nunca	Todos los dias	Todos los dias	Todos los dias	Dos a tres veces al mes	Una o dos veces a la semana	Siete días	Siete días	Seis días	3	2	No	Mucho más de lo normal	0 min	Más de 1 h	Más de 1 h	Más de 1 h	Sí	2-3 h	2-3 h	0 min	30-60 min	0 min	0 min	0 min	30-60 min	16-30 min	A menudo	A menudo	De vez en cuando	A menudo	A menudo	A menudo	A menudo	A menudo	De vez en cuando	Todos los dias	Nunca
33	Mujer	33.9624	Soltero(a)	Dos a tres veces al mes	Todos los dias	Dos a tres veces al mes	Dos a tres veces al mes	Dos a tres veces al mes	Dos a tres veces al mes	Una vez al mes	Nunca	Todos los dias	Dos a tres veces al mes	Una vez al mes	Dos a tres veces al mes	Una vez al mes	Todos los dias	Un dia	Siete días	Dos días	1	0	Si	Mucho más de lo normal	0 min	0 min	1-10 min	1-10 min	Sí	2-3 h	2-3 h	0 min	0 min	3-4 h	0 min	0 min	0 min	2-3 h	Casi nunca	Nunca	Casi nunca	Muy a menudo	Muy a menudo	Nunca	Muy a menudo	Muy a menudo	Nunca	Una a tres veces al mes	Todos los dias
19	Mujer	24.8889	Soltero(a)	Todos los dias	Nunca	Nunca	Tres a cuatro veces por semama	Todos los dias	Todos los dias	Nunca	Nunca	Todos los dias	Dos a tres veces al mes	Todos los dias	Dos a tres veces al mes	Una o dos veces a la semana	Todos los dias	Siete días	Siete días	Cinco días	3	1	Si	Un poco más de lo normal	0 min	21-30 min	31-60 min	Más de 1 h	Sí	2-3 h	2-3 h	0 min	30-60 min	1-15 min	1-15 min	16-30 min	30-60 min	1-15 min	Casi nunca	De vez en cuando	Casi nunca	Muy a menudo	De vez en cuando	De vez en cuando	A menudo	A menudo	Casi nunca	Todos los dias	Nunca
22	Mujer	36.3281	Soltero(a)	Una o dos veces a la semana	Nunca	Tres a cuatro veces por semama	Dos a tres veces al mes	Una vez al mes	Una o dos veces a la semana	Nunca	Nunca	Todos los dias	Todos los dias	Todos los dias	Todos los dias	Todos los dias	Todos los dias	Siete días	Siete días	Cinco días	3	2	Si	Un poco más de lo normal	31-60 min	31-60 min	Más de 1 h	31-60 min	Sí	2-3 h	2-3 h	0 min	0 min	30-60 min	0 min	0 min	30-60 min	0 min	A menudo	De vez en cuando	A menudo	De vez en cuando	De vez en cuando	A menudo	De vez en cuando	De vez en cuando	De vez en cuando	Una a cuatro veces por semana	Nunca
30	Mujer	25.3906	Casado(a)	Todos los dias	Nunca	Una vez al mes	Nunca	Nunca	Nunca	Una vez al mes	Dos a tres veces al mes	Todos los dias	Tres a cuatro veces por semama	Una o dos veces a la semana	Una o dos veces a la semana	Una o dos veces a la semana	Tres a cuatro veces por semama	Siete días	Siete días	Siete días	3	3	Si	Un poco más de lo normal	16-30 min	11-20 min	1-10 min	1-10 min	Sí	2-3 h	2-3 h	0 min	1-2 h	1-2 h	2-3 h	0 min	1-2 h	30-60 min	De vez en cuando	De vez en cuando	De vez en cuando	A menudo	A menudo	Casi nunca	Muy a menudo	De vez en cuando	Casi nunca	Todos los dias	Nunca
24	Mujer	29.7778	Soltero(a)	Una o dos veces a la semana	Nunca	Dos a tres veces al mes	Una o dos veces a la semana	Nunca	Nunca	Una vez al mes	Una vez al mes	Todos los dias	Dos a tres veces al mes	Todos los dias	Una o dos veces a la semana	Dos a tres veces al mes	Todos los dias	Siete días	Siete días	Siete días	3	2	Si	Mucho más de lo normal	31-60 min	21-30 min	31-60 min	21-30 min	Sí	2-3 h	2-3 h	0 min	1-15 min	16-30 min	0 min	16-30 min	2-3 h	30-60 min	De vez en cuando	De vez en cuando	A menudo	De vez en cuando	De vez en cuando	De vez en cuando	De vez en cuando	De vez en cuando	De vez en cuando	Una a cuatro veces por semana	Nunca
32	Mujer	20.3125	Soltero(a)	Nunca	Dos a tres veces al mes	Una vez al mes	Una vez al mes	Una vez al mes	Nunca	Nunca	Nunca	Todos los dias	Una o dos veces a la semana	Una vez al mes	Nunca	Dos a tres veces al mes	Todos los dias	Siete días	Siete días	Cuatro días	3	1	Si	Un poco más de lo normal	0 min	21-30 min	11-20 min	11-20 min	Sí	2-3 h	2-3 h	0 min	1-2 h	30-60 min	0 min	0 min	30-60 min	0 min	De vez en cuando	De vez en cuando	De vez en cuando	Casi nunca	Casi nunca	Casi nunca	A menudo	A menudo	Casi nunca	Nunca	Una a tres veces al mes
34	Mujer	32.7186	Casado(a)	Una o dos veces a la semana	Dos a tres veces al mes	Nunca	Nunca	Dos a tres veces al mes	Una o dos veces a la semana	Dos a tres veces al mes	Nunca	Todos los dias	Dos a tres veces al mes	Dos a tres veces al mes	Una vez al mes	Tres a cuatro veces por semama	Todos los dias	Siete días	Siete días	Siete días	3	1	Si	Mucho más de lo normal	1-15 min	11-20 min	11-20 min	11-20 min	Sí	2-3 h	2-3 h	0 min	30-60 min	1-2 h	30-60 min	30-60 min	30-60 min	1-2 h	A menudo	Casi nunca	A menudo	A menudo	A menudo	Casi nunca	A menudo	A menudo	De vez en cuando	Una a cuatro veces por semana	Una a tres veces al mes
32	Mujer	20.0773	Casado(a)	Todos los dias	Nunca	Nunca	Dos a tres veces al mes	Una vez al mes	Una vez al mes	Tres a cuatro veces por semana	Nunca	Tres a cuatro veces por semama	Nunca	Todos los dias	Tres a cuatro veces por semama	Nunca	Todos los dias	Siete días	Siete días	Siete días	3	2	Si	Un poco menos de lo normal	0 min	21-30 min	21-30 min	21-30 min	Sí	2-3 h	2-3 h	0 min	0 min	0 min	0 min	0 min	0 min	0 min	Nunca	Casi nunca	Casi nunca	A menudo	A menudo	De vez en cuando	A menudo	De vez en cuando	Casi nunca	Todos los dias	Nunca
21	Mujer	23.3355	Soltero(a)	Todos los dias	Tres a cuatro veces por semama	Dos a tres veces al mes	Dos a tres veces al mes	Una o dos veces a la semana	Una o dos veces a la semana	Nunca	Nunca	Todos los dias	Tres a cuatro veces por semama	Tres a cuatro veces por semama	Una o dos veces a la semana	Nunca	Todos los dias	Siete días	Siete días	Siete días	3	2	Si	Mucho más de lo normal	1-15 min	21-30 min	31-60 min	21-30 min	Sí	2-3 h	2-3 h	0 min	0 min	0 min	0 min	0 min	30-60 min	2-3 h	Muy a menudo	A menudo	A menudo	De vez en cuando	De vez en cuando	De vez en cuando	Muy a menudo	De vez en cuando	De vez en cuando	Todos los dias	Una a cuatro veces por semana
33	Mujer	27.2392	Casado(a)	Una o dos veces a la semana	Una o dos veces a la semana	Dos a tres veces al mes	Dos a tres veces al mes	Una vez al mes	Una vez al mes	Nunca	Nunca	Una o dos veces a la semana	Tres a cuatro veces por semama	Nunca	Una vez al mes	Nunca	Todos los dias	Seis días	Siete días	Seis días	3	1	Si	Un poco más de lo normal	0 min	11-20 min	21-30 min	31-60 min	Sí	2-3 h	2-3 h	0 min	2-3 h	3-4 h	0 min	16-30 min	3-4 h	3-4 h	Nunca	Casi nunca	De vez en cuando	Muy a menudo	A menudo	Casi nunca	Muy a menudo	A menudo	Nunca	Una a cuatro veces por semana	Una a cuatro veces por semana
29	Hombre	33.4124	Soltero(a)	Todos los dias	Dos a tres veces al mes	Dos a tres veces al mes	Una o dos veces a la semana	Una vez al mes	Una vez al mes	Una vez al mes	Una vez al mes	Todos los dias	Una vez al mes	Nunca	Una vez al mes	Una vez al mes	Todos los dias	Siete días	Siete días	Siete días	3	1	Si	Un poco menos de lo normal	31-60 min	11-20 min	11-20 min	11-20 min	Sí	2-3 h	2-3 h	0 min	30-60 min	1-15 min	16-30 min	0 min	1-2 h	2-3 h	A menudo	A menudo	Muy a menudo	De vez en cuando	De vez en cuando	A menudo	De vez en cuando	De vez en cuando	A menudo	Todos los dias	Una a tres veces al mes
62	Mujer	28	Casado(a)	Todos los dias	Todos los dias	Nunca	Una vez al mes	Dos a tres veces al mes	Nunca	Dos a tres veces al mes	Nunca	Todos los dias	Una o dos veces a la semana	Dos a tres veces al mes	Una vez al mes	Dos a tres veces al mes	Todos los dias	Un dia	Siete días	Tres dias	1	3	Si	Más o menos igual	16-30 min	0 min	11-20 min	11-20 min	No	2-3 h	2-3 h	0 min	30-60 min	0 min	0 min	0 min	0 min	2-3 h	De vez en cuando	Nunca	De vez en cuando	A menudo	A menudo	Casi nunca	De vez en cuando	De vez en cuando	De vez en cuando	Todos los dias	Todos los dias
32	Mujer	24.2424	Soltero(a)	Todos los dias	Nunca	Nunca	Nunca	Nunca	Una o dos veces a la semana	Nunca	Nunca	Nunca	Una o dos veces a la semana	Una o dos veces a la semana	Dos a tres veces al mes	Todos los dias	Todos los dias	Siete días	Siete días	Un dia	2	2	Si	Mucho más de lo normal	0 min	21-30 min	31-60 min	1-10 min	Sí	2-3 h	2-3 h	0 min	0 min	16-30 min	0 min	0 min	30-60 min	0 min	De vez en cuando	De vez en cuando	A menudo	De vez en cuando	De vez en cuando	De vez en cuando	De vez en cuando	Casi nunca	De vez en cuando	Todos los dias	Nunca
41	Mujer	27.1816	Casado(a)	Una o dos veces a la semana	Una vez al mes	Una o dos veces a la semana	Tres a cuatro veces por semama	Una o dos veces a la semana	Todos los dias	Una o dos veces a la semana	Nunca	Todos los dias	Todos los dias	Todos los dias	Dos a tres veces al mes	Una o dos veces a la semana	Todos los dias	Siete días	Siete días	Siete días	3	1	Si	Mucho más de lo normal	Más de 1 hora	21-30 min	21-30 min	21-30 min	Sí	2-3 h	2-3 h	0 min	30-60 min	1-2 h	0 min	0 min	16-30 min	1-2 h	De vez en cuando	De vez en cuando	Muy a menudo	Muy a menudo	Muy a menudo	De vez en cuando	Muy a menudo	Muy a menudo	De vez en cuando	Una a cuatro veces por semana	Una a tres veces al mes
57	Mujer	24.2123	Casado(a)	Una o dos veces a la semana	Nunca	Nunca	Una o dos veces a la semana	Nunca	Nunca	Dos a tres veces al mes	Nunca	Todos los dias	Dos a tres veces al mes	Dos a tres veces al mes	Una vez al mes	Tres a cuatro veces por semama	Todos los dias	Siete días	Siete días	Siete días	3	1	Si	Mucho más de lo normal	1-15 min	Más de 1 h	21-30 min	21-30 min	Sí	2-3 h	2-3 h	0 min	30-60 min	2-3 h	0 min	0 min	16-30 min	0 min	De vez en cuando	De vez en cuando	De vez en cuando	A menudo	A menudo	De vez en cuando	A menudo	A menudo	De vez en cuando	Una a cuatro veces por semana	Nunca
73	Hombre	24.6914	Casado(a)	Una o dos veces a la semana	Nunca	Nunca	Nunca	Nunca	Nunca	Dos a tres veces al mes	Nunca	Tres a cuatro veces por semama	Dos a tres veces al mes	Una o dos veces a la semana	Dos a tres veces al mes	Una o dos veces a la semana	Todos los dias	Siete días	Siete días	Dos días	2	1	Si	Un poco menos de lo normal	1-15 min	11-20 min	21-30 min	1-10 min	No	2-3 h	2-3 h	1-2 h	16-30 min	30-60 min	0 min	0 min	30-60 min	0 min	De vez en cuando	Casi nunca	De vez en cuando	De vez en cuando	A menudo	De vez en cuando	A menudo	A menudo	De vez en cuando	Una a cuatro veces por semana	Nunca
31	Hombre	29.9836	Soltero(a)	Todos los dias	Nunca	Una vez al mes	Una o dos veces a la semana	Una vez al mes	Una vez al mes	Una o dos veces a la semana	Una vez al mes	Todos los dias	Tres a cuatro veces por semama	Una o dos veces a la semana	Una vez al mes	Tres a cuatro veces por semama	Todos los dias	Siete días	Siete días	Siete días	3	2	Si	Un poco más de lo normal	16-30 min	21-30 min	21-30 min	31-60 min	Sí	2-3 h	2-3 h	1-2 h	0 min	0 min	16-30 min	30-60 min	30-60 min	1-2 h	Casi nunca	De vez en cuando	De vez en cuando	Muy a menudo	A menudo	Casi nunca	Muy a menudo	A menudo	Casi nunca	Todos los dias	Nunca
48	Hombre	29.0698	Casado(a)	Todos los dias	Nunca	Nunca	Una vez al mes	Nunca	Nunca	Nunca	Una vez al mes	Tres a cuatro veces por semama	Dos a tres veces al mes	Dos a tres veces al mes	Una vez al mes	Dos a tres veces al mes	Todos los dias	Siete días	Siete días	Siete días	3	2	Si	Más o menos igual	31-60 min	1-10 min	21-30 min	21-30 min	Sí	2-3 h	2-3 h	1-2 h	30-60 min	2-3 h	2-3 h	1-2 h	1-2 h	0 min	De vez en cuando	Casi nunca	A menudo	Casi nunca	A menudo	Casi nunca	Muy a menudo	A menudo	Casi nunca	Todos los dias	Nunca
41	Mujer	25.8645	Soltero(a)	Una vez al mes	Nunca	Una vez al mes	Nunca	Una vez al mes	Una vez al mes	Dos a tres veces al mes	Una vez al mes	Todos los dias	Una vez al mes	Dos a tres veces al mes	Una vez al mes	Dos a tres veces al mes	Todos los dias	Siete días	Siete días	Tres dias	2	0	Si	Más o menos igual	16-30 min	11-20 min	Más de 1 h	31-60 min	Sí	2-3 h	2-3 h	16-30 min	0 min	0 min	0 min	0 min	30-60 min	0 min	De vez en cuando	Casi nunca	De vez en cuando	A menudo	A menudo	Casi nunca	A menudo	De vez en cuando	De vez en cuando	Una a tres veces al mes	Nunca
32	Hombre	22.9481	Casado(a)	Tres a cuatro veces por semama	Dos a tres veces al mes	Una vez al mes	Dos a tres veces al mes	Nunca	Nunca	Nunca	Una vez al mes	Todos los dias	Una o dos veces a la semana	Una o dos veces a la semana	Una o dos veces a la semana	Todos los dias	Tres a cuatro veces por semama	Siete días	Siete días	Siete días	3	2	Si	Mucho más de lo normal	0 min	11-20 min	21-30 min	21-30 min	Sí	2-3 h	2-3 h	30-60 min	30-60 min	30-60 min	2-3 h	0 min	16-30 min	30-60 min	Casi nunca	Casi nunca	De vez en cuando	A menudo	A menudo	Muy a menudo	A menudo	A menudo	Casi nunca	Una a cuatro veces por semana	Una a tres veces al mes
20	Mujer	18.8588	Soltero(a)	Todos los dias	Nunca	Nunca	Una o dos veces a la semana	Nunca	Dos a tres veces al mes	Una o dos veces a la semana	Nunca	Todos los dias	Tres a cuatro veces por semama	Tres a cuatro veces por semama	Tres a cuatro veces por semama	Una o dos veces a la semana	Tres a cuatro veces por semama	Siete días	Siete días	Tres dias	3	1	No	Mucho más de lo normal	0 min	11-20 min	31-60 min	31-60 min	Sí	2-3 h	3-4 h	0 min	0 min	2-3 h	0 min	2-3 h	0 min	1-2 h	A menudo	De vez en cuando	Muy a menudo	De vez en cuando	De vez en cuando	A menudo	De vez en cuando	Casi nunca	A menudo	Todos los dias	Nunca
27	Mujer	24.3496	Soltero(a)	Todos los dias	Nunca	Una vez al mes	Una vez al mes	Una vez al mes	Una vez al mes	Nunca	Nunca	Todos los dias	Una o dos veces a la semana	Nunca	Nunca	Una vez al mes	Todos los dias	Siete días	Siete días	Siete días	4	1	Si	Más o menos igual	0 min	21-30 min	31-60 min	31-60 min	Sí	2-3 h	3-4 h	0 min	0 min	30-60 min	0 min	0 min	2-3 h	0 min	Casi nunca	Casi nunca	De vez en cuando	A menudo	De vez en cuando	Casi nunca	A menudo	A menudo	Casi nunca	Todos los dias	Nunca
32	Mujer	21.4844	Soltero(a)	Una vez al mes	Una vez al mes	Una vez al mes	Una o dos veces a la semana	Nunca	Nunca	Nunca	Nunca	Todos los dias	Tres a cuatro veces por semama	Tres a cuatro veces por semama	Una vez al mes	Dos a tres veces al mes	Tres a cuatro veces por semama	Siete días	Siete días	Siete días	3	0	No	Mucho menos de lo normal	0 min	11-20 min	21-30 min	11-20 min	Sí	2-3 h	3-4 h	0 min	1-2 h	2-3 h	1-2 h	0 min	30-60 min	30-60 min	Casi nunca	Nunca	De vez en cuando	Muy a menudo	A menudo	Casi nunca	Muy a menudo	A menudo	Casi nunca	Una a tres veces al mes	Una a tres veces al mes
21	Mujer	25.7117	Soltero(a)	Todos los dias	Nunca	Tres a cuatro veces por semama	Tres a cuatro veces por semama	Todos los dias	Todos los dias	Dos a tres veces al mes	Nunca	Todos los dias	Todos los dias	Una o dos veces a la semana	Una o dos veces a la semana	Nunca	Todos los dias	Siete días	Siete días	Siete días	3	2	Si	Mucho más de lo normal	Más de 1 hora	31-60 min	21-30 min	21-30 min	Sí	2-3 h	3-4 h	0 min	0 min	0 min	0 min	30-60 min	30-60 min	2-3 h	De vez en cuando	De vez en cuando	A menudo	A menudo	De vez en cuando	A menudo	De vez en cuando	De vez en cuando	De vez en cuando	Todos los dias	Nunca
30	Mujer	30.8248	Soltero(a)	Todos los dias	Todos los dias	Todos los dias	Todos los dias	Todos los dias	Todos los dias	Todos los dias	Una vez al mes	Todos los dias	Todos los dias	Todos los dias	Dos a tres veces al mes	Dos a tres veces al mes	Todos los dias	Dos días	Siete días	Cuatro días	2	2	No	Mucho menos de lo normal	31-60 min	0 min	11-20 min	1-10 min	Sí	2-3 h	3-4 h	0 min	0 min	16-30 min	0 min	0 min	1-15 min	3-4 h	Muy a menudo	Muy a menudo	Muy a menudo	De vez en cuando	De vez en cuando	Muy a menudo	De vez en cuando	Casi nunca	De vez en cuando	Todos los dias	Todos los dias
25	Mujer	22.4323	Soltero(a)	Tres a cuatro veces por semama	Nunca	Dos a tres veces al mes	Dos a tres veces al mes	Dos a tres veces al mes	Dos a tres veces al mes	Nunca	Nunca	Todos los dias	Una o dos veces a la semana	Una o dos veces a la semana	Dos a tres veces al mes	Una vez al mes	Todos los dias	Siete días	Siete días	Siete días	2	2	Si	Un poco más de lo normal	0 min	11-20 min	21-30 min	11-20 min	Sí	2-3 h	3-4 h	0 min	2-3 h	1-2 h	0 min	1-15 min	2-3 h	0 min	De vez en cuando	Casi nunca	De vez en cuando	A menudo	A menudo	Casi nunca	A menudo	A menudo	Casi nunca	Una a cuatro veces por semana	Nunca
41	Mujer	24.3911	Soltero(a)	Una o dos veces a la semana	Una vez al mes	Una vez al mes	Dos a tres veces al mes	Dos a tres veces al mes	Una vez al mes	Dos a tres veces al mes	Nunca	Todos los dias	Dos a tres veces al mes	Todos los dias	Dos a tres veces al mes	Dos a tres veces al mes	Dos a tres veces al mes	Siete días	Siete días	Siete días	3	1	Si	Más o menos igual	0 min	11-20 min	21-30 min	11-20 min	Sí	2-3 h	3-4 h	0 min	0 min	0 min	0 min	0 min	0 min	0 min	Nunca	Nunca	Casi nunca	Muy a menudo	Muy a menudo	Nunca	Muy a menudo	Muy a menudo	Casi nunca	Una a cuatro veces por semana	Una a tres veces al mes
28	Mujer	27.0051	Soltero(a)	Una vez al mes	Todos los dias	Una o dos veces a la semana	Una vez al mes	Una vez al mes	Dos a tres veces al mes	Una vez al mes	Una vez al mes	Todos los dias	Tres a cuatro veces por semama	Una o dos veces a la semana	Una o dos veces a la semana	Una vez al mes	Todos los dias	Un dia	Dos días	Siete días	1	1	Si	Un poco más de lo normal	16-30 min	Más de 1 h	Más de 1 h	Más de 1 h	Sí	2-3 h	3-4 h	0 min	0 min	16-30 min	0 min	0 min	1-2 h	1-2 h	De vez en cuando	Casi nunca	Casi nunca	A menudo	A menudo	De vez en cuando	A menudo	A menudo	De vez en cuando	Una a tres veces al mes	Todos los dias
64	Hombre	20.2216	Casado(a)	Todos los dias	Nunca	Dos a tres veces al mes	Nunca	Nunca	Nunca	Tres a cuatro veces por semana	Dos a tres veces al mes	Todos los dias	Todos los dias	Todos los dias	Una o dos veces a la semana	Dos a tres veces al mes	Todos los dias	Siete días	Siete días	Siete días	2	2	No	Un poco más de lo normal	31-60 min	21-30 min	Más de 1 h	21-30 min	Sí	2-3 h	3-4 h	0 min	30-60 min	1-2 h	0 min	0 min	2-3 h	0 min	De vez en cuando	De vez en cuando	De vez en cuando	A menudo	A menudo	De vez en cuando	A menudo	A menudo	Casi nunca	Todos los dias	Nunca
54	Mujer	19.1001	Soltero(a)	Una o dos veces a la semana	Nunca	Nunca	Nunca	Nunca	Nunca	Nunca	Nunca	Todos los dias	Una o dos veces a la semana	Dos a tres veces al mes	Una vez al mes	Todos los dias	Todos los dias	Siete días	Siete días	Siete días	3	2	No	Más o menos igual	1-15 min	11-20 min	21-30 min	21-30 min	Sí	2-3 h	3-4 h	1-15 min	0 min	1-15 min	0 min	30-60 min	30-60 min	0 min	Casi nunca	De vez en cuando	De vez en cuando	De vez en cuando	De vez en cuando	Casi nunca	De vez en cuando	De vez en cuando	Casi nunca	Una a cuatro veces por semana	Nunca
21	Hombre	23.1405	Soltero(a)	Dos a tres veces al mes	Nunca	Dos a tres veces al mes	Dos a tres veces al mes	Tres a cuatro veces por semama	Una o dos veces a la semana	Tres a cuatro veces por semana	Una o dos veces a la semana	Todos los dias	Una o dos veces a la semana	Una o dos veces a la semana	Dos a tres veces al mes	Dos a tres veces al mes	Una o dos veces a la semana	Siete días	Siete días	Siete días	3	0	Si	Un poco más de lo normal	0 min	21-30 min	21-30 min	21-30 min	Sí	2-3 h	3-4 h	1-15 min	2-3 h	30-60 min	1-15 min	16-30 min	16-30 min	2-3 h	A menudo	A menudo	A menudo	De vez en cuando	De vez en cuando	A menudo	De vez en cuando	De vez en cuando	De vez en cuando	Una a tres veces al mes	Nunca
54	Mujer	19.1001	Soltero(a)	Una o dos veces a la semana	Nunca	Nunca	Nunca	Nunca	Nunca	Nunca	Nunca	Todos los dias	Una o dos veces a la semana	Dos a tres veces al mes	Una vez al mes	Todos los dias	Todos los dias	Siete días	Siete días	Siete días	3	2	No	Más o menos igual	1-15 min	11-20 min	21-30 min	21-30 min	Sí	2-3 h	3-4 h	1-15 min	0 min	1-15 min	0 min	30-60 min	30-60 min	0 min	Casi nunca	De vez en cuando	De vez en cuando	De vez en cuando	De vez en cuando	Casi nunca	De vez en cuando	De vez en cuando	Casi nunca	Una a cuatro veces por semana	Nunca
50	Mujer	31.935	Soltero(a)	Tres a cuatro veces por semama	Nunca	Una vez al mes	Dos a tres veces al mes	Una o dos veces a la semana	Tres a cuatro veces por semama	Una vez al mes	Una vez al mes	Todos los dias	Tres a cuatro veces por semama	Dos a tres veces al mes	Dos a tres veces al mes	Una vez al mes	Todos los dias	Siete días	Siete días	Siete días	2	2	Si	Un poco más de lo normal	31-60 min	11-20 min	21-30 min	11-20 min	Sí	2-3 h	3-4 h	1-2 h	16-30 min	30-60 min	30-60 min	30-60 min	30-60 min	16-30 min	De vez en cuando	De vez en cuando	De vez en cuando	A menudo	De vez en cuando	De vez en cuando	De vez en cuando	De vez en cuando	De vez en cuando	Una a cuatro veces por semana	Nunca
22	Mujer	26.6436	Soltero(a)	Tres a cuatro veces por semama	Dos a tres veces al mes	Una o dos veces a la semana	Dos a tres veces al mes	Una o dos veces a la semana	Todos los dias	Nunca	Nunca	Todos los dias	Dos a tres veces al mes	Todos los dias	Dos a tres veces al mes	Dos a tres veces al mes	Tres a cuatro veces por semama	Cinco días	Siete días	Cinco días	3	2	Si	Más o menos igual	16-30 min	11-20 min	11-20 min	11-20 min	Sí	2-3 h	3-4 h	16-30 min	2-3 h	30-60 min	0 min	30-60 min	1-15 min	0 min	De vez en cuando	A menudo	De vez en cuando	De vez en cuando	De vez en cuando	De vez en cuando	De vez en cuando	De vez en cuando	De vez en cuando	Una a cuatro veces por semana	Una a tres veces al mes
48	Mujer	22.3094	Casado(a)	Todos los dias	Dos a tres veces al mes	Nunca	Nunca	Nunca	Nunca	Nunca	Nunca	Todos los dias	Una vez al mes	Una vez al mes	Nunca	Todos los dias	Todos los dias	Siete días	Siete días	Siete días	3	2	Si	Mucho menos de lo normal	16-30 min	1-10 min	11-20 min	11-20 min	No	2-3 h	30-60 min	0 min	0 min	3-4 h	2-3 h	0 min	1-2 h	1-2 h	Casi nunca	De vez en cuando	De vez en cuando	Muy a menudo	A menudo	De vez en cuando	A menudo	A menudo	Casi nunca	Todos los dias	Una a tres veces al mes
22	Mujer	25.4694	Soltero(a)	Una o dos veces a la semana	Una o dos veces a la semana	Dos a tres veces al mes	Una o dos veces a la semana	Todos los dias	Una o dos veces a la semana	Una o dos veces a la semana	Dos a tres veces al mes	Todos los dias	Una o dos veces a la semana	Dos a tres veces al mes	Nunca	Todos los dias	Todos los dias	Siete días	Siete días	Siete días	3	1	Si	Mucho más de lo normal	0 min	11-20 min	31-60 min	31-60 min	Sí	2-3 h	30-60 min	0 min	3-4 h	2-3 h	0 min	3-4 h	3-4 h	1-2 h	Muy a menudo	Muy a menudo	Muy a menudo	De vez en cuando	De vez en cuando	Muy a menudo	Casi nunca	De vez en cuando	Muy a menudo	Una a cuatro veces por semana	Una a cuatro veces por semana
49	Mujer	21.7994	Separado(a)	Dos a tres veces al mes	Nunca	Una vez al mes	Dos a tres veces al mes	Dos a tres veces al mes	Nunca	Una vez al mes	Una vez al mes	Todos los dias	Tres a cuatro veces por semama	Tres a cuatro veces por semama	Una vez al mes	Tres a cuatro veces por semama	Todos los dias	Siete días	Siete días	Siete días	3	1	Si	Mucho menos de lo normal	16-30 min	1-10 min	11-20 min	11-20 min	No	2-3 h	30-60 min	0 min	0 min	3-4 h	0 min	1-2 h	30-60 min	0 min	De vez en cuando	Casi nunca	De vez en cuando	A menudo	De vez en cuando	De vez en cuando	Muy a menudo	A menudo	De vez en cuando	Una a tres veces al mes	Nunca
50	Mujer	27.1816	Casado(a)	Tres a cuatro veces por semama	Dos a tres veces al mes	Nunca	Tres a cuatro veces por semama	Todos los dias	Tres a cuatro veces por semama	Nunca	Nunca	Todos los dias	Todos los dias	Una o dos veces a la semana	Una vez al mes	Una o dos veces a la semana	Todos los dias	Siete días	Siete días	Un dia	2	1	No	Un poco más de lo normal	16-30 min	21-30 min	21-30 min	0 min	No	3-4 h	0 min	0 min	0 min	0 min	0 min	0 min	0 min	0 min	Casi nunca	Casi nunca	De vez en cuando	A menudo	A menudo	Casi nunca	A menudo	A menudo	Casi nunca	Una a cuatro veces por semana	Una a tres veces al mes
29	Mujer	42.2406	Soltero(a)	Una o dos veces a la semana	Nunca	Una vez al mes	Una o dos veces a la semana	Una o dos veces a la semana	Todos los dias	Una o dos veces a la semana	Nunca	Tres a cuatro veces por semama	Una o dos veces a la semana	Una o dos veces a la semana	Una o dos veces a la semana	Dos a tres veces al mes	Todos los dias	Siete días	Siete días	Dos días	3	1	Si	Mucho más de lo normal	16-30 min	31-60 min	31-60 min	0 min	Sí	3-4 h	0 min	0 min	0 min	16-30 min	16-30 min	0 min	30-60 min	0 min	De vez en cuando	A menudo	A menudo	De vez en cuando	De vez en cuando	A menudo	De vez en cuando	De vez en cuando	De vez en cuando	Una a cuatro veces por semana	Nunca
36	Mujer	28.3039	Soltero(a)	Nunca	Todos los dias	Nunca	Nunca	Nunca	Nunca	Una vez al mes	Nunca	Todos los dias	Una vez al mes	Nunca	Nunca	Nunca	Todos los dias	Un dia	Siete días	Siete días	2	0	No	Un poco menos de lo normal	0 min	0 min	11-20 min	11-20 min	Sí	3-4 h	1-15 min	0 min	2-3 h	3-4 h	0 min	0 min	16-30 min	1-2 h	De vez en cuando	Nunca	De vez en cuando	A menudo	A menudo	A menudo	Muy a menudo	A menudo	De vez en cuando	Nunca	Todos los dias
22	Mujer	25	Soltero(a)	Todos los dias	Tres a cuatro veces por semama	Dos a tres veces al mes	Todos los dias	Todos los dias	Todos los dias	Nunca	Nunca	Todos los dias	Todos los dias	Tres a cuatro veces por semama	Nunca	Dos a tres veces al mes	Nunca	Dos días	Siete días	Siete días	2	2	Si	Mucho más de lo normal	1-15 min	11-20 min	21-30 min	21-30 min	Sí	3-4 h	1-15 min	30-60 min	2-3 h	0 min	0 min	0 min	0 min	0 min	Muy a menudo	Muy a menudo	Muy a menudo	Muy a menudo	De vez en cuando	Muy a menudo	De vez en cuando	De vez en cuando	Muy a menudo	Todos los dias	Una a cuatro veces por semana
48	Mujer	27.2392	Soltero(a)	Una o dos veces a la semana	Una o dos veces a la semana	Dos a tres veces al mes	Una o dos veces a la semana	Una vez al mes	Una vez al mes	Una vez al mes	Nunca	Todos los dias	Dos a tres veces al mes	Dos a tres veces al mes	Una vez al mes	Una vez al mes	Todos los dias	Dos días	Siete días	Siete días	2	2	Si	Un poco más de lo normal	1-15 min	0 min	21-30 min	21-30 min	No	3-4 h	1-2 h	0 min	16-30 min	3-4 h	0 min	1-15 min	16-30 min	0 min	De vez en cuando	De vez en cuando	De vez en cuando	A menudo	A menudo	Casi nunca	De vez en cuando	De vez en cuando	Casi nunca	Una a cuatro veces por semana	Una a cuatro veces por semana
42	Mujer	26.4463	Soltero(a)	Tres a cuatro veces por semama	Una o dos veces a la semana	Tres a cuatro veces por semama	Una o dos veces a la semana	Una o dos veces a la semana	Una o dos veces a la semana	Una o dos veces a la semana	Nunca	Todos los dias	Una o dos veces a la semana	Tres a cuatro veces por semama	Una vez al mes	Nunca	Todos los dias	Cinco días	Siete días	Seis días	3	2	Si	Mucho más de lo normal	Más de 1 hora	1-10 min	11-20 min	1-10 min	No	3-4 h	1-2 h	0 min	0 min	0 min	0 min	30-60 min	1-15 min	0 min	De vez en cuando	Casi nunca	Casi nunca	A menudo	A menudo	Casi nunca	A menudo	De vez en cuando	Nunca	Una a cuatro veces por semana	Una a cuatro veces por semana
36	Mujer	19.8347	Separado(a)	Todos los dias	Nunca	Nunca	Nunca	Nunca	Nunca	Una vez al mes	Una vez al mes	Todos los dias	Dos a tres veces al mes	Dos a tres veces al mes	Una vez al mes	Todos los dias	Todos los dias	Siete días	Siete días	Siete días	3	2	No	Un poco más de lo normal	16-30 min	31-60 min	31-60 min	31-60 min	Sí	3-4 h	1-2 h	0 min	1-2 h	1-2 h	0 min	0 min	3-4 h	3-4 h	Casi nunca	Casi nunca	De vez en cuando	A menudo	A menudo	De vez en cuando	A menudo	A menudo	De vez en cuando	Todos los dias	Nunca
31	Mujer	29.7339	Soltero(a)	Una o dos veces a la semana	Tres a cuatro veces por semama	Dos a tres veces al mes	Dos a tres veces al mes	Tres a cuatro veces por semama	Dos a tres veces al mes	Una vez al mes	Nunca	Dos a tres veces al mes	Todos los dias	Dos a tres veces al mes	Dos a tres veces al mes	Una o dos veces a la semana	Tres a cuatro veces por semama	Siete días	Siete días	Tres dias	2	1	No	Mucho más de lo normal	16-30 min	21-30 min	21-30 min	0 min	Sí	3-4 h	1-2 h	0 min	16-30 min	0 min	0 min	0 min	0 min	30-60 min	De vez en cuando	De vez en cuando	A menudo	De vez en cuando	A menudo	De vez en cuando	Muy a menudo	A menudo	Casi nunca	Una a cuatro veces por semana	Una a cuatro veces por semana
48	Mujer	27.5312	Separado(a)	Una o dos veces a la semana	Una o dos veces a la semana	Una vez al mes	Tres a cuatro veces por semama	Nunca	Dos a tres veces al mes	Dos a tres veces al mes	Dos a tres veces al mes	Todos los dias	Tres a cuatro veces por semama	Una o dos veces a la semana	Dos a tres veces al mes	Tres a cuatro veces por semama	Tres a cuatro veces por semama	Siete días	Siete días	Seis días	2	1	No	Más o menos igual	16-30 min	11-20 min	21-30 min	11-20 min	No	3-4 h	1-2 h	0 min	0 min	16-30 min	0 min	0 min	0 min	0 min	De vez en cuando	De vez en cuando	De vez en cuando	Muy a menudo	A menudo	Casi nunca	Muy a menudo	A menudo	Casi nunca	Una a cuatro veces por semana	Una a cuatro veces por semana
31	Mujer	23.2335	Soltero(a)	Todos los dias	Una vez al mes	Dos a tres veces al mes	Una o dos veces a la semana	Dos a tres veces al mes	Nunca	Una vez al mes	Una vez al mes	Todos los dias	Una o dos veces a la semana	Una o dos veces a la semana	Una o dos veces a la semana	Una o dos veces a la semana	Todos los dias	Siete días	Siete días	Cinco días	2	1	Si	Un poco más de lo normal	31-60 min	21-30 min	21-30 min	31-60 min	Sí	3-4 h	1-2 h	0 min	0 min	0 min	0 min	2-3 h	1-2 h	0 min	De vez en cuando	A menudo	De vez en cuando	Muy a menudo	A menudo	De vez en cuando	De vez en cuando	De vez en cuando	De vez en cuando	Todos los dias	Una a tres veces al mes
26	Mujer	24.0238	Soltero(a)	Tres a cuatro veces por semama	Una vez al mes	Tres a cuatro veces por semama	Tres a cuatro veces por semama	Tres a cuatro veces por semama	Tres a cuatro veces por semama	Una vez al mes	Una vez al mes	Todos los dias	Tres a cuatro veces por semama	Una vez al mes	Una vez al mes	Tres a cuatro veces por semama	Todos los dias	Cinco días	Siete días	Cuatro días	3	1	No	Más o menos igual	Más de 1 hora	21-30 min	Más de 1 h	31-60 min	No	3-4 h	1-2 h	0 min	30-60 min	1-2 h	16-30 min	0 min	1-2 h	30-60 min	Muy a menudo	A menudo	A menudo	De vez en cuando	Casi nunca	De vez en cuando	De vez en cuando	De vez en cuando	A menudo	Una a cuatro veces por semana	Una a tres veces al mes
18	Mujer	26.2222	Soltero(a)	Una o dos veces a la semana	Nunca	Nunca	Nunca	Una o dos veces a la semana	Una o dos veces a la semana	Nunca	Nunca	Todos los dias	Dos a tres veces al mes	Una o dos veces a la semana	Dos a tres veces al mes	Dos a tres veces al mes	Todos los dias	Siete días	Siete días	Siete días	3	2	Si	Mucho menos de lo normal	0 min	11-20 min	11-20 min	11-20 min	Sí	3-4 h	1-2 h	0 min	0 min	0 min	0 min	0 min	1-15 min	0 min	De vez en cuando	Casi nunca	De vez en cuando	A menudo	De vez en cuando	De vez en cuando	A menudo	De vez en cuando	De vez en cuando	Una a cuatro veces por semana	Nunca
58	Mujer	29.2969	Casado(a)	Todos los dias	Nunca	Nunca	Nunca	Nunca	Dos a tres veces al mes	Nunca	Nunca	Todos los dias	Una o dos veces a la semana	Una o dos veces a la semana	Dos a tres veces al mes	Todos los dias	Tres a cuatro veces por semama	Siete días	Siete días	Cinco días	1	2	Si	Mucho menos de lo normal	0 min	21-30 min	31-60 min	21-30 min	Sí	3-4 h	2-3 h	0 min	1-2 h	3-4 h	1-2 h	0 min	1-2 h	2-3 h	Casi nunca	Casi nunca	Casi nunca	A menudo	A menudo	De vez en cuando	A menudo	A menudo	Casi nunca	Todos los dias	Nunca
59	Hombre	26.5643	Soltero(a)	Una vez al mes	Nunca	Nunca	Nunca	Una vez al mes	Nunca	Nunca	Nunca	Todos los dias	Nunca	Una vez al mes	Dos a tres veces al mes	Una o dos veces a la semana	Todos los dias	Siete días	Siete días	Siete días	3	1	Si	Un poco más de lo normal	16-30 min	21-30 min	21-30 min	21-30 min	No	3-4 h	2-3 h	0 min	30-60 min	2-3 h	2-3 h	1-2 h	30-60 min	0 min	Casi nunca	Casi nunca	De vez en cuando	Muy a menudo	A menudo	De vez en cuando	A menudo	A menudo	A menudo	Una a tres veces al mes	Nunca
31	Mujer	28.5156	Soltero(a)	Todos los dias	Una o dos veces a la semana	Dos a tres veces al mes	Una o dos veces a la semana	Una o dos veces a la semana	Una o dos veces a la semana	Nunca	Dos a tres veces al mes	Todos los dias	Todos los dias	Una o dos veces a la semana	Una o dos veces a la semana	Tres a cuatro veces por semama	Todos los dias	Siete días	Siete días	Siete días	3	2	Si	Mucho más de lo normal	1-15 min	11-20 min	31-60 min	31-60 min	No	3-4 h	2-3 h	0 min	16-30 min	1-2 h	0 min	30-60 min	1-2 h	1-15 min	A menudo	A menudo	A menudo	A menudo	A menudo	A menudo	De vez en cuando	De vez en cuando	A menudo	Todos los dias	Una a cuatro veces por semana
67	Hombre	32.5964	Casado(a)	Una o dos veces a la semana	Una o dos veces a la semana	Dos a tres veces al mes	Nunca	Una vez al mes	Dos a tres veces al mes	Tres a cuatro veces por semana	Nunca	Todos los dias	Una o dos veces a la semana	Una o dos veces a la semana	Una o dos veces a la semana	Tres a cuatro veces por semama	Todos los dias	Siete días	Siete días	Siete días	3	1	Si	Un poco más de lo normal	31-60 min	1-10 min	11-20 min	11-20 min	Sí	3-4 h	2-3 h	0 min	0 min	2-3 h	0 min	1-2 h	16-30 min	2-3 h	Casi nunca	Casi nunca	Casi nunca	Muy a menudo	Muy a menudo	Casi nunca	Muy a menudo	Muy a menudo	Casi nunca	Una a cuatro veces por semana	Una a cuatro veces por semana
38	Mujer	34.2222	Casado(a)	Tres a cuatro veces por semama	Una o dos veces a la semana	Una o dos veces a la semana	Todos los dias	Todos los dias	Todos los dias	Una o dos veces a la semana	Nunca	Todos los dias	Nunca	Todos los dias	Una vez al mes	Nunca	Todos los dias	Siete días	Siete días	Siete días	3	2	Si	Mucho más de lo normal	0 min	Más de 1 h	Más de 1 h	Más de 1 h	No	3-4 h	2-3 h	0 min	0 min	2-3 h	2-3 h	0 min	1-2 h	3-4 h	Muy a menudo	De vez en cuando	Muy a menudo	A menudo	A menudo	De vez en cuando	A menudo	De vez en cuando	De vez en cuando	Una a cuatro veces por semana	Una a cuatro veces por semana
28	Mujer	23.8728	Soltero(a)	Todos los dias	Nunca	Tres a cuatro veces por semama	Tres a cuatro veces por semama	Una vez al mes	Dos a tres veces al mes	Nunca	Una vez al mes	Todos los dias	Dos a tres veces al mes	Una o dos veces a la semana	Dos a tres veces al mes	Dos a tres veces al mes	Todos los dias	Siete días	Siete días	Siete días	3	2	Si	Mucho más de lo normal	31-60 min	21-30 min	21-30 min	21-30 min	Sí	3-4 h	2-3 h	0 min	1-2 h	30-60 min	0 min	16-30 min	30-60 min	0 min	De vez en cuando	De vez en cuando	De vez en cuando	De vez en cuando	De vez en cuando	A menudo	A menudo	A menudo	A menudo	Todos los dias	Nunca
27	Mujer	24.2439	Soltero(a)	Una o dos veces a la semana	Nunca	Una vez al mes	Una o dos veces a la semana	Nunca	Nunca	Dos a tres veces al mes	Una vez al mes	Tres a cuatro veces por semama	Dos a tres veces al mes	Dos a tres veces al mes	Dos a tres veces al mes	Tres a cuatro veces por semama	Nunca	Siete días	Siete días	Seis días	3	1	No	Mucho más de lo normal	16-30 min	1-10 min	31-60 min	11-20 min	Sí	3-4 h	2-3 h	0 min	0 min	1-15 min	0 min	0 min	16-30 min	2-3 h	De vez en cuando	Casi nunca	De vez en cuando	A menudo	A menudo	Casi nunca	A menudo	A menudo	Casi nunca	Una a cuatro veces por semana	Nunca
21	Mujer	25.0762	Soltero(a)	Todos los dias	Dos a tres veces al mes	Nunca	Una o dos veces a la semana	Una o dos veces a la semana	Tres a cuatro veces por semama	Una vez al mes	Nunca	Todos los dias	Tres a cuatro veces por semama	Dos a tres veces al mes	Dos a tres veces al mes	Una o dos veces a la semana	Todos los dias	Siete días	Siete días	Cuatro días	2	2	Si	Un poco más de lo normal	31-60 min	11-20 min	21-30 min	11-20 min	Sí	3-4 h	2-3 h	0 min	30-60 min	1-2 h	1-2 h	0 min	16-30 min	0 min	De vez en cuando	A menudo	Muy a menudo	De vez en cuando	A menudo	A menudo	A menudo	De vez en cuando	De vez en cuando	Todos los dias	Una a tres veces al mes
39	Mujer	26.2188	Separado(a)	Todos los dias	Una o dos veces a la semana	Una o dos veces a la semana	Una o dos veces a la semana	Tres a cuatro veces por semama	Dos a tres veces al mes	Tres a cuatro veces por semana	Nunca	Todos los dias	Una o dos veces a la semana	Una o dos veces a la semana	Una o dos veces a la semana	Tres a cuatro veces por semama	Tres a cuatro veces por semama	Seis días	Siete días	Tres dias	1	1	Si	Mucho más de lo normal	0 min	11-20 min	31-60 min	11-20 min	Sí	3-4 h	2-3 h	30-60 min	30-60 min	30-60 min	30-60 min	0 min	2-3 h	1-15 min	De vez en cuando	Casi nunca	A menudo	A menudo	A menudo	Casi nunca	A menudo	A menudo	Casi nunca	Todos los dias	Una a cuatro veces por semana
39	Mujer	32.0073	Casado(a)	Tres a cuatro veces por semama	Nunca	Dos a tres veces al mes	Una vez al mes	Una vez al mes	Dos a tres veces al mes	Dos a tres veces al mes	Nunca	Todos los dias	Todos los dias	Una vez al mes	Una vez al mes	Todos los dias	Todos los dias	Siete días	Siete días	Siete días	3	1	No	Más o menos igual	Más de 1 hora	31-60 min	31-60 min	31-60 min	Sí	3-4 h	3-4 h	0 min	16-30 min	1-15 min	3-4 h	0 min	0 min	3-4 h	De vez en cuando	De vez en cuando	De vez en cuando	A menudo	A menudo	De vez en cuando	A menudo	A menudo	De vez en cuando	Una a cuatro veces por semana	Nunca
47	Mujer	27.1809	Casado(a)	Una o dos veces a la semana	Dos a tres veces al mes	Dos a tres veces al mes	Dos a tres veces al mes	Una vez al mes	Tres a cuatro veces por semama	Una o dos veces a la semana	Dos a tres veces al mes	Todos los dias	Todos los dias	Dos a tres veces al mes	Tres a cuatro veces por semama	Una o dos veces a la semana	Una o dos veces a la semana	Siete días	Siete días	Cinco días	3	2	No	Mucho más de lo normal	16-30 min	21-30 min	21-30 min	21-30 min	Sí	3-4 h	3-4 h	0 min	16-30 min	16-30 min	1-15 min	16-30 min	2-3 h	0 min	De vez en cuando	Casi nunca	De vez en cuando	A menudo	Muy a menudo	Casi nunca	Muy a menudo	Muy a menudo	Casi nunca	Una a cuatro veces por semana	Una a tres veces al mes
50	Mujer	39.4421	Casado(a)	Una o dos veces a la semana	Dos a tres veces al mes	Nunca	Nunca	Nunca	Nunca	Tres a cuatro veces por semana	Una o dos veces a la semana	Tres a cuatro veces por semama	Una o dos veces a la semana	Una o dos veces a la semana	Una o dos veces a la semana	Tres a cuatro veces por semama	Todos los dias	Cinco días	Siete días	Cinco días	2	1	No	Mucho más de lo normal	Más de 1 hora	11-20 min	21-30 min	21-30 min	No	3-4 h	3-4 h	0 min	1-2 h	3-4 h	0 min	0 min	3-4 h	1-2 h	Casi nunca	Casi nunca	De vez en cuando	Muy a menudo	A menudo	Casi nunca	Muy a menudo	Muy a menudo	Casi nunca	Una a cuatro veces por semana	Una a tres veces al mes
22	Mujer	29.3848	Soltero(a)	Una o dos veces a la semana	Todos los dias	Tres a cuatro veces por semama	Tres a cuatro veces por semama	Tres a cuatro veces por semama	Tres a cuatro veces por semama	Una o dos veces a la semana	Una o dos veces a la semana	Tres a cuatro veces por semama	Todos los dias	Todos los dias	Todos los dias	Una o dos veces a la semana	Todos los dias	Cuatro días	Siete días	Cuatro días	1	2	No	Mucho más de lo normal	Más de 1 hora	Más de 1 h	Más de 1 h	Más de 1 h	Sí	3-4 h	3-4 h	0 min	3-4 h	3-4 h	0 min	0 min	3-4 h	3-4 h	Muy a menudo	Muy a menudo	Muy a menudo	A menudo	A menudo	A menudo	A menudo	De vez en cuando	De vez en cuando	Una a cuatro veces por semana	Todos los dias
25	Mujer	17.2248	Soltero(a)	Todos los dias	Una o dos veces a la semana	Una o dos veces a la semana	Una o dos veces a la semana	Nunca	Dos a tres veces al mes	Una vez al mes	Una vez al mes	Todos los dias	Una vez al mes	Dos a tres veces al mes	Dos a tres veces al mes	Una vez al mes	Tres a cuatro veces por semama	Siete días	Siete días	Seis días	4	1	Si	Mucho más de lo normal	16-30 min	Más de 1 h	21-30 min	31-60 min	Sí	3-4 h	3-4 h	0 min	16-30 min	1-15 min	16-30 min	1-15 min	1-2 h	1-15 min	De vez en cuando	Casi nunca	De vez en cuando	A menudo	De vez en cuando	De vez en cuando	A menudo	A menudo	De vez en cuando	Todos los dias	Una a cuatro veces por semana
24	Hombre	23.8088	Soltero(a)	Nunca	Dos a tres veces al mes	Dos a tres veces al mes	Nunca	Dos a tres veces al mes	Todos los dias	Una vez al mes	Dos a tres veces al mes	Todos los dias	Todos los dias	Todos los dias	Todos los dias	Todos los dias	Todos los dias	Siete días	Siete días	Siete días	3	0	No	Un poco más de lo normal	31-60 min	11-20 min	31-60 min	21-30 min	Sí	3-4 h	3-4 h	0 min	1-2 h	30-60 min	0 min	30-60 min	30-60 min	30-60 min	Nunca	Nunca	De vez en cuando	Muy a menudo	Muy a menudo	Casi nunca	A menudo	A menudo	Casi nunca	Nunca	Una a tres veces al mes
30	Mujer	31.378	Casado(a)	Una o dos veces a la semana	Una o dos veces a la semana	Dos a tres veces al mes	Dos a tres veces al mes	Una o dos veces a la semana	Una o dos veces a la semana	Una o dos veces a la semana	Nunca	Una o dos veces a la semana	Tres a cuatro veces por semama	Una vez al mes	Una o dos veces a la semana	Nunca	Todos los dias	Siete días	Siete días	Cinco días	4	2	No	Un poco más de lo normal	0 min	Más de 1 h	Más de 1 h	Más de 1 h	No	3-4 h	3-4 h	0 min	0 min	0 min	0 min	0 min	0 min	3-4 h	De vez en cuando	De vez en cuando	De vez en cuando	A menudo	De vez en cuando	De vez en cuando	A menudo	A menudo	De vez en cuando	Una a cuatro veces por semana	Una a cuatro veces por semana
32	Mujer	28.6048	Soltero(a)	Todos los dias	Una o dos veces a la semana	Todos los dias	Todos los dias	Todos los dias	Todos los dias	Dos a tres veces al mes	Dos a tres veces al mes	Todos los dias	Todos los dias	Todos los dias	Todos los dias	Todos los dias	Todos los dias	Cuatro días	Cinco días	Siete días	3	2	Si	Mucho más de lo normal	Más de 1 hora	Más de 1 h	Más de 1 h	Más de 1 h	Sí	3-4 h	3-4 h	0 min	30-60 min	0 min	0 min	0 min	3-4 h	0 min	Muy a menudo	Muy a menudo	Muy a menudo	Muy a menudo	De vez en cuando	Muy a menudo	De vez en cuando	De vez en cuando	Muy a menudo	Todos los dias	Una a cuatro veces por semana
29	Mujer	20.7031	Soltero(a)	Todos los dias	Tres a cuatro veces por semama	Todos los dias	Todos los dias	Tres a cuatro veces por semama	Todos los dias	Nunca	Nunca	Todos los dias	Todos los dias	Todos los dias	Dos a tres veces al mes	Nunca	Todos los dias	Siete días	Siete días	Siete días	3	3	Si	Más o menos igual	0 min	1-10 min	11-20 min	11-20 min	Sí	3-4 h	3-4 h	0 min	0 min	30-60 min	0 min	16-30 min	2-3 h	16-30 min	De vez en cuando	De vez en cuando	De vez en cuando	De vez en cuando	De vez en cuando	De vez en cuando	De vez en cuando	De vez en cuando	De vez en cuando	Todos los dias	Una a cuatro veces por semana
47	Mujer	20.4382	Soltero(a)	Tres a cuatro veces por semama	Nunca	Dos a tres veces al mes	Una o dos veces a la semana	Una o dos veces a la semana	Una o dos veces a la semana	Una vez al mes	Nunca	Todos los dias	Todos los dias	Nunca	Dos a tres veces al mes	Nunca	Todos los dias	Siete días	Siete días	Cinco días	2	2	Si	Un poco más de lo normal	0 min	11-20 min	11-20 min	0 min	No	3-4 h	3-4 h	0 min	0 min	0 min	0 min	0 min	0 min	0 min	A menudo	De vez en cuando	A menudo	De vez en cuando	De vez en cuando	De vez en cuando	De vez en cuando	De vez en cuando	De vez en cuando	Una a cuatro veces por semana	Nunca
26	Mujer	25.0657	Soltero(a)	Una o dos veces a la semana	Nunca	Una vez al mes	Una vez al mes	Una o dos veces a la semana	Todos los dias	Una vez al mes	Dos a tres veces al mes	Todos los dias	Una vez al mes	Nunca	Todos los dias	Nunca	Todos los dias	Siete días	Siete días	Siete días	3	2	Si	Un poco menos de lo normal	0 min	11-20 min	11-20 min	11-20 min	No	3-4 h	3-4 h	0 min	30-60 min	30-60 min	30-60 min	30-60 min	30-60 min	0 min	De vez en cuando	Muy a menudo	Muy a menudo	De vez en cuando	De vez en cuando	De vez en cuando	De vez en cuando	De vez en cuando	A menudo	Una a cuatro veces por semana	Nunca
33	Mujer	25.1532	Soltero(a)	Una o dos veces a la semana	Una o dos veces a la semana	Nunca	Dos a tres veces al mes	Dos a tres veces al mes	Dos a tres veces al mes	Una vez al mes	Una vez al mes	Todos los dias	Una o dos veces a la semana	Una vez al mes	Nunca	Tres a cuatro veces por semama	Todos los dias	Siete días	Siete días	Siete días	3	1	Si	Mucho más de lo normal	0 min	11-20 min	31-60 min	1-10 min	Sí	3-4 h	3-4 h	0 min	0 min	2-3 h	1-2 h	1-2 h	1-2 h	0 min	A menudo	A menudo	A menudo	De vez en cuando	De vez en cuando	A menudo	De vez en cuando	De vez en cuando	A menudo	Una a cuatro veces por semana	Una a cuatro veces por semana
19	Mujer	21.0962	Soltero(a)	Una o dos veces a la semana	Dos a tres veces al mes	Nunca	Una vez al mes	Una vez al mes	Una vez al mes	Dos a tres veces al mes	Una vez al mes	Todos los dias	Dos a tres veces al mes	Dos a tres veces al mes	Dos a tres veces al mes	Dos a tres veces al mes	Todos los dias	Seis días	Siete días	Siete días	3	1	Si	Un poco más de lo normal	1-15 min	31-60 min	31-60 min	31-60 min	Sí	3-4 h	3-4 h	0 min	0 min	16-30 min	0 min	16-30 min	16-30 min	3-4 h	De vez en cuando	De vez en cuando	Muy a menudo	A menudo	A menudo	De vez en cuando	A menudo	A menudo	Casi nunca	Una a cuatro veces por semana	Una a tres veces al mes
50	Mujer	22.0317	Soltero(a)	Todos los dias	Nunca	Nunca	Dos a tres veces al mes	Nunca	Una o dos veces a la semana	Dos a tres veces al mes	Dos a tres veces al mes	Nunca	Dos a tres veces al mes	Dos a tres veces al mes	Nunca	Dos a tres veces al mes	Tres a cuatro veces por semama	Siete días	Siete días	Siete días	3	2	No	Un poco más de lo normal	0 min	31-60 min	Más de 1 h	31-60 min	Sí	3-4 h	3-4 h	0 min	0 min	1-2 h	0 min	0 min	0 min	0 min	De vez en cuando	Casi nunca	A menudo	A menudo	A menudo	De vez en cuando	A menudo	A menudo	Casi nunca	Todos los dias	Nunca
40	Hombre	24.8971	Soltero(a)	Todos los dias	Todos los dias	Nunca	Nunca	Nunca	Nunca	Todos los dias	Una vez al mes	Nunca	Tres a cuatro veces por semama	Tres a cuatro veces por semama	Tres a cuatro veces por semama	Tres a cuatro veces por semama	Todos los dias	Dos días	Siete días	Siete días	2	1	No	Mucho más de lo normal	Más de 1 hora	31-60 min	Más de 1 h	31-60 min	Sí	3-4 h	3-4 h	0 min	0 min	30-60 min	0 min	2-3 h	0 min	0 min	Casi nunca	De vez en cuando	Casi nunca	Nunca	Muy a menudo	Nunca	Muy a menudo	Muy a menudo	Nunca	Todos los dias	Todos los dias
65	Mujer	19.6283	Casado(a)	Una o dos veces a la semana	Nunca	Nunca	Dos a tres veces al mes	Nunca	Nunca	Una vez al mes	Dos a tres veces al mes	Todos los dias	Todos los dias	Tres a cuatro veces por semama	Dos a tres veces al mes	Todos los dias	Todos los dias	Siete días	Siete días	Siete días	2	0	Si	Más o menos igual	31-60 min	1-10 min	Más de 1 h	Más de 1 h	Sí	3-4 h	3-4 h	0 min	0 min	1-2 h	0 min	1-15 min	1-15 min	0 min	Casi nunca	Casi nunca	Casi nunca	Muy a menudo	Muy a menudo	Casi nunca	Muy a menudo	Muy a menudo	Nunca	Una a cuatro veces por semana	Nunca
32	Mujer	26.7094	Soltero(a)	Una o dos veces a la semana	Una o dos veces a la semana	Nunca	Tres a cuatro veces por semama	Una vez al mes	Nunca	Una vez al mes	Dos a tres veces al mes	Una vez al mes	Una o dos veces a la semana	Nunca	Una vez al mes	Una o dos veces a la semana	Dos a tres veces al mes	Tres dias	Siete días	Siete días	3	0	No	Un poco más de lo normal	16-30 min	21-30 min	21-30 min	21-30 min	Sí	3-4 h	3-4 h	0 min	1-2 h	0 min	0 min	0 min	0 min	0 min	De vez en cuando	Nunca	Casi nunca	Muy a menudo	Muy a menudo	De vez en cuando	A menudo	A menudo	De vez en cuando	Una a cuatro veces por semana	Una a cuatro veces por semana
56	Mujer	26.6389	Casado(a)	Nunca	Nunca	Nunca	Nunca	Nunca	Nunca	Dos a tres veces al mes	Nunca	Todos los dias	Nunca	Nunca	Nunca	Todos los dias	Todos los dias	Siete días	Siete días	Cinco días	1	0	No	Un poco menos de lo normal	1-15 min	1-10 min	31-60 min	1-10 min	No	3-4 h	3-4 h	16-30 min	0 min	1-15 min	1-15 min	1-15 min	1-15 min	1-15 min	Nunca	Casi nunca	Casi nunca	Muy a menudo	Muy a menudo	Nunca	Muy a menudo	Muy a menudo	Nunca	Nunca	Nunca
23	Hombre	28.3937	Soltero(a)	Tres a cuatro veces por semama	Una vez al mes	Tres a cuatro veces por semama	Tres a cuatro veces por semama	Tres a cuatro veces por semama	Tres a cuatro veces por semama	Una o dos veces a la semana	Una vez al mes	Todos los dias	Tres a cuatro veces por semama	Una o dos veces a la semana	Tres a cuatro veces por semama	Dos a tres veces al mes	Tres a cuatro veces por semama	Cinco días	Siete días	Siete días	3	3	Si	Mucho más de lo normal	31-60 min	1-10 min	11-20 min	1-10 min	Sí	3-4 h	3-4 h	2-3 h	0 min	0 min	0 min	0 min	1-2 h	3-4 h	Casi nunca	Casi nunca	De vez en cuando	De vez en cuando	De vez en cuando	Casi nunca	A menudo	A menudo	Casi nunca	Una a cuatro veces por semana	Una a tres veces al mes
24	Mujer	32.831	Soltero(a)	Todos los dias	Una vez al mes	Tres a cuatro veces por semama	Todos los dias	Todos los dias	Todos los dias	Una vez al mes	Una vez al mes	Todos los dias	Todos los dias	Una o dos veces a la semana	Una o dos veces a la semana	Una o dos veces a la semana	Todos los dias	Siete días	Siete días	Siete días	4	3	Si	Mucho más de lo normal	Más de 1 hora	Más de 1 h	Más de 1 h	Más de 1 h	No	3-4 h	3-4 h	3-4 h	0 min	3-4 h	0 min	0 min	3-4 h	0 min	De vez en cuando	De vez en cuando	De vez en cuando	A menudo	Casi nunca	Casi nunca	Casi nunca	Casi nunca	Muy a menudo	Todos los dias	Una a tres veces al mes
19	Mujer	34.1401	Soltero(a)	Tres a cuatro veces por semama	Una vez al mes	Una o dos veces a la semana	Dos a tres veces al mes	Dos a tres veces al mes	Una o dos veces a la semana	Tres a cuatro veces por semana	Dos a tres veces al mes	Tres a cuatro veces por semama	Una o dos veces a la semana	Una o dos veces a la semana	Una o dos veces a la semana	Dos a tres veces al mes	Dos a tres veces al mes	Cuatro días	Seis días	Siete días	3	2	No	Un poco menos de lo normal	Más de 1 hora	1-10 min	11-20 min	1-10 min	Sí	3-4 h	3-4 h	30-60 min	1-2 h	16-30 min	0 min	16-30 min	2-3 h	0 min	De vez en cuando	De vez en cuando	A menudo	De vez en cuando	De vez en cuando	De vez en cuando	De vez en cuando	De vez en cuando	De vez en cuando	Una a cuatro veces por semana	Una a tres veces al mes
32	Hombre	24.2188	Soltero(a)	Tres a cuatro veces por semama	Nunca	Una vez al mes	Nunca	Nunca	Nunca	Dos a tres veces al mes	Una vez al mes	Todos los dias	Dos a tres veces al mes	Dos a tres veces al mes	Dos a tres veces al mes	Todos los dias	Dos a tres veces al mes	Siete días	Siete días	Siete días	3	1	Si	Un poco más de lo normal	31-60 min	11-20 min	21-30 min	11-20 min	Sí	3-4 h	30-60 min	1-2 h	0 min	16-30 min	0 min	0 min	3-4 h	0 min	De vez en cuando	De vez en cuando	A menudo	De vez en cuando	De vez en cuando	De vez en cuando	De vez en cuando	De vez en cuando	Casi nunca	Una a cuatro veces por semana	Nunca
26	Mujer	22.2222	Soltero(a)	Todos los dias	Nunca	Una vez al mes	Una vez al mes	Dos a tres veces al mes	Una vez al mes	Una vez al mes	Una vez al mes	Todos los dias	Todos los dias	Dos a tres veces al mes	Dos a tres veces al mes	Tres a cuatro veces por semama	Una vez al mes	Siete días	Siete días	Siete días	3	1	Si	Más o menos igual	31-60 min	11-20 min	21-30 min	11-20 min	No	30-60 min	0 min	0 min	0 min	0 min	1-2 h	0 min	0 min	0 min	Muy a menudo	De vez en cuando	De vez en cuando	A menudo	De vez en cuando	De vez en cuando	A menudo	De vez en cuando	De vez en cuando	Todos los dias	Nunca
34	Mujer	22.2063	Soltero(a)	Nunca	Una vez al mes	Nunca	Todos los dias	Nunca	Nunca	Nunca	Una o dos veces a la semana	Todos los dias	Una vez al mes	Tres a cuatro veces por semama	Tres a cuatro veces por semama	Una vez al mes	Todos los dias	Cinco días	Cinco días	Cinco días	5	3	Si	Mucho menos de lo normal	Más de 1 hora	21-30 min	21-30 min	21-30 min	Sí	30-60 min	0 min	16-30 min	1-15 min	16-30 min	0 min	0 min	1-15 min	1-15 min	A menudo	De vez en cuando	Muy a menudo	A menudo	De vez en cuando	Muy a menudo	A menudo	De vez en cuando	De vez en cuando	Nunca	Una a tres veces al mes
42	Mujer	26.4463	Casado(a)	Una vez al mes	Nunca	Una vez al mes	Una vez al mes	Una vez al mes	Nunca	Una vez al mes	Una o dos veces a la semana	Todos los dias	Una vez al mes	Una vez al mes	Una vez al mes	Una o dos veces a la semana	Todos los dias	Siete días	Siete días	Siete días	3	0	Si	Mucho más de lo normal	1-15 min	11-20 min	11-20 min	11-20 min	No	30-60 min	1-15 min	0 min	16-30 min	0 min	0 min	0 min	0 min	0 min	Casi nunca	Casi nunca	De vez en cuando	Muy a menudo	Muy a menudo	Casi nunca	A menudo	A menudo	Casi nunca	Una a tres veces al mes	Nunca
31	Mujer	22.8928	Casado(a)	Una o dos veces a la semana	Dos a tres veces al mes	Una vez al mes	Una vez al mes	Dos a tres veces al mes	Una vez al mes	Una o dos veces a la semana	Nunca	Todos los dias	Todos los dias	Una vez al mes	Dos a tres veces al mes	Una vez al mes	Una vez al mes	Siete días	Siete días	Un dia	2	2	No	Un poco más de lo normal	0 min	1-10 min	21-30 min	0 min	No	30-60 min	1-15 min	0 min	0 min	3-4 h	3-4 h	0 min	0 min	0 min	De vez en cuando	De vez en cuando	Muy a menudo	De vez en cuando	De vez en cuando	De vez en cuando	A menudo	De vez en cuando	Casi nunca	Una a cuatro veces por semana	Una a tres veces al mes
31	Mujer	24.2424	Soltero(a)	Una o dos veces a la semana	Todos los dias	Dos a tres veces al mes	Dos a tres veces al mes	Una o dos veces a la semana	Una o dos veces a la semana	Una vez al mes	Una vez al mes	Todos los dias	Una o dos veces a la semana	Dos a tres veces al mes	Una vez al mes	Dos a tres veces al mes	Todos los dias	Siete días	Siete días	Siete días	3	1	Si	Un poco más de lo normal	0 min	21-30 min	21-30 min	21-30 min	Sí	30-60 min	1-2 h	0 min	0 min	30-60 min	2-3 h	0 min	30-60 min	0 min	Casi nunca	De vez en cuando	A menudo	A menudo	De vez en cuando	De vez en cuando	De vez en cuando	De vez en cuando	Muy a menudo	Una a cuatro veces por semana	Todos los dias
25	Mujer	23.7332	Soltero(a)	Tres a cuatro veces por semama	Nunca	Nunca	Dos a tres veces al mes	Tres a cuatro veces por semama	Una o dos veces a la semana	Una vez al mes	Nunca	Todos los dias	Todos los dias	Nunca	Nunca	Todos los dias	Todos los dias	Siete días	Siete días	Siete días	3	1	Si	Mucho más de lo normal	0 min	1-10 min	1-10 min	1-10 min	Sí	30-60 min	1-2 h	0 min	0 min	3-4 h	3-4 h	0 min	3-4 h	0 min	A menudo	De vez en cuando	Muy a menudo	De vez en cuando	De vez en cuando	A menudo	A menudo	A menudo	A menudo	Una a cuatro veces por semana	Nunca
40	Mujer	18.2066	Separado(a)	Tres a cuatro veces por semama	Nunca	Dos a tres veces al mes	Dos a tres veces al mes	Una vez al mes	Dos a tres veces al mes	Una vez al mes	Una vez al mes	Todos los dias	Todos los dias	Todos los dias	Una vez al mes	Tres a cuatro veces por semama	Todos los dias	Siete días	Siete días	Siete días	3	1	Si	Más o menos igual	0 min	11-20 min	11-20 min	11-20 min	Sí	30-60 min	1-2 h	0 min	1-2 h	1-15 min	2-3 h	16-30 min	3-4 h	0 min	De vez en cuando	De vez en cuando	A menudo	A menudo	A menudo	De vez en cuando	A menudo	A menudo	De vez en cuando	Una a cuatro veces por semana	Nunca
46	Mujer	20.3125	Casado(a)	Nunca	Nunca	Nunca	Tres a cuatro veces por semama	Nunca	Nunca	Nunca	Nunca	Todos los dias	Todos los dias	Nunca	Nunca	Dos a tres veces al mes	Todos los dias	Siete días	Siete días	Siete días	3	0	Si	Mucho más de lo normal	16-30 min	11-20 min	11-20 min	11-20 min	Sí	30-60 min	1-2 h	0 min	0 min	3-4 h	1-15 min	0 min	0 min	0 min	Casi nunca	Nunca	Nunca	Nunca	Muy a menudo	Casi nunca	Muy a menudo	Muy a menudo	Nunca	Nunca	Nunca
76	Hombre	23.9869	Casado(a)	Tres a cuatro veces por semama	Nunca	Dos a tres veces al mes	Dos a tres veces al mes	Nunca	Dos a tres veces al mes	Nunca	Nunca	Todos los dias	Tres a cuatro veces por semama	Tres a cuatro veces por semama	Dos a tres veces al mes	Dos a tres veces al mes	Tres a cuatro veces por semama	Siete días	Siete días	Siete días	2	1	Si	Un poco más de lo normal	16-30 min	11-20 min	21-30 min	11-20 min	Sí	30-60 min	1-2 h	0 min	1-2 h	30-60 min	1-15 min	16-30 min	30-60 min	1-2 h	De vez en cuando	Casi nunca	Casi nunca	Muy a menudo	A menudo	Casi nunca	Muy a menudo	A menudo	Casi nunca	Una a cuatro veces por semana	Nunca
22	Mujer	46.6134	Soltero(a)	Todos los dias	Nunca	Una vez al mes	Todos los dias	Todos los dias	Todos los dias	Tres a cuatro veces por semana	Nunca	Todos los dias	Todos los dias	Todos los dias	Tres a cuatro veces por semama	Todos los dias	Todos los dias	Siete días	Siete días	Siete días	3	3	No	Mucho más de lo normal	Más de 1 hora	31-60 min	31-60 min	31-60 min	Sí	30-60 min	1-2 h	0 min	30-60 min	1-2 h	2-3 h	0 min	30-60 min	2-3 h	De vez en cuando	A menudo	Muy a menudo	A menudo	A menudo	De vez en cuando	A menudo	A menudo	De vez en cuando	Todos los dias	Nunca
24	Mujer	28.959	Casado(a)	Una o dos veces a la semana	Una o dos veces a la semana	Una vez al mes	Dos a tres veces al mes	Una vez al mes	Nunca	Dos a tres veces al mes	Nunca	Todos los dias	Dos a tres veces al mes	Dos a tres veces al mes	Una vez al mes	Una vez al mes	Dos a tres veces al mes	Un dia	Un dia	Un dia	3	1	Si	Un poco más de lo normal	31-60 min	1-10 min	1-10 min	1-10 min	Sí	30-60 min	1-2 h	0 min	0 min	1-2 h	0 min	0 min	30-60 min	0 min	De vez en cuando	Casi nunca	De vez en cuando	Muy a menudo	A menudo	Muy a menudo	Muy a menudo	A menudo	Casi nunca	Una a cuatro veces por semana	Una a cuatro veces por semana
48	Hombre	28.7197	Casado(a)	Una o dos veces a la semana	Nunca	Nunca	Dos a tres veces al mes	Nunca	Nunca	Nunca	Nunca	Todos los dias	Una vez al mes	Una vez al mes	Una vez al mes	Todos los dias	Una o dos veces a la semana	Siete días	Siete días	Dos días	2	1	Si	Más o menos igual	31-60 min	21-30 min	21-30 min	21-30 min	Sí	30-60 min	1-2 h	0 min	30-60 min	30-60 min	30-60 min	30-60 min	30-60 min	0 min	De vez en cuando	Casi nunca	A menudo	A menudo	De vez en cuando	De vez en cuando	A menudo	De vez en cuando	Casi nunca	Una a cuatro veces por semana	Nunca
60	Mujer	23.4586	Casado(a)	Dos a tres veces al mes	Nunca	Nunca	Nunca	Nunca	Nunca	Nunca	Nunca	Todos los dias	Dos a tres veces al mes	Dos a tres veces al mes	Nunca	Todos los dias	Todos los dias	Siete días	Siete días	Siete días	3	2	No	Más o menos igual	0 min	11-20 min	21-30 min	21-30 min	Sí	30-60 min	1-2 h	0 min	16-30 min	16-30 min	0 min	1-15 min	1-15 min	0 min	De vez en cuando	Casi nunca	Casi nunca	A menudo	Muy a menudo	Casi nunca	Casi nunca	De vez en cuando	Casi nunca	Una a tres veces al mes	Nunca
40	Mujer	22.3674	Soltero(a)	Una o dos veces a la semana	Nunca	Nunca	Nunca	Nunca	Tres a cuatro veces por semama	Dos a tres veces al mes	Dos a tres veces al mes	Todos los dias	Dos a tres veces al mes	Dos a tres veces al mes	Dos a tres veces al mes	Nunca	Todos los dias	Siete días	Siete días	Siete días	3	1	Si	Más o menos igual	0 min	1-10 min	11-20 min	11-20 min	Sí	30-60 min	1-2 h	0 min	0 min	0 min	0 min	0 min	0 min	0 min	Muy a menudo	Casi nunca	Muy a menudo	Muy a menudo	Muy a menudo	Casi nunca	Muy a menudo	A menudo	Casi nunca	Una a cuatro veces por semana	Nunca
38	Hombre	38.3664	Soltero(a)	Nunca	Nunca	Nunca	Nunca	Una vez al mes	Nunca	Dos a tres veces al mes	Nunca	Todos los dias	Una vez al mes	Dos a tres veces al mes	Una o dos veces a la semana	Una vez al mes	Todos los dias	Siete días	Siete días	Siete días	3	2	No	Un poco más de lo normal	0 min	21-30 min	21-30 min	31-60 min	Sí	30-60 min	1-2 h	0 min	0 min	3-4 h	0 min	0 min	2-3 h	0 min	De vez en cuando	Casi nunca	A menudo	De vez en cuando	De vez en cuando	Casi nunca	A menudo	A menudo	Casi nunca	Nunca	Nunca
21	Mujer	21.9261	Soltero(a)	Una o dos veces a la semana	Dos a tres veces al mes	Nunca	Dos a tres veces al mes	Nunca	Dos a tres veces al mes	Dos a tres veces al mes	Una vez al mes	Una o dos veces a la semana	Una o dos veces a la semana	Tres a cuatro veces por semama	Dos a tres veces al mes	Tres a cuatro veces por semama	Todos los dias	Seis días	Siete días	Seis días	2	1	No	Mucho más de lo normal	31-60 min	21-30 min	31-60 min	11-20 min	Sí	30-60 min	1-2 h	0 min	2-3 h	16-30 min	0 min	1-15 min	1-2 h	0 min	A menudo	A menudo	Muy a menudo	De vez en cuando	De vez en cuando	De vez en cuando	De vez en cuando	De vez en cuando	De vez en cuando	Una a cuatro veces por semana	Una a tres veces al mes
37	Mujer	24.2188	Soltero(a)	Una o dos veces a la semana	Nunca	Una vez al mes	Una vez al mes	Una o dos veces a la semana	Dos a tres veces al mes	Una o dos veces a la semana	Una vez al mes	Todos los dias	Dos a tres veces al mes	Todos los dias	Dos a tres veces al mes	Una vez al mes	Tres a cuatro veces por semama	Siete días	Siete días	Siete días	3	1	Si	Mucho más de lo normal	31-60 min	11-20 min	11-20 min	11-20 min	Sí	30-60 min	1-2 h	1-15 min	0 min	0 min	0 min	0 min	0 min	0 min	De vez en cuando	De vez en cuando	A menudo	De vez en cuando	A menudo	De vez en cuando	De vez en cuando	De vez en cuando	De vez en cuando	Una a cuatro veces por semana	Nunca
25	Mujer	29.9688	Soltero(a)	Nunca	Todos los dias	Nunca	Dos a tres veces al mes	Tres a cuatro veces por semama	Todos los dias	Dos a tres veces al mes	Una vez al mes	Tres a cuatro veces por semama	Una o dos veces a la semana	Una o dos veces a la semana	Una o dos veces a la semana	Una o dos veces a la semana	Tres a cuatro veces por semama	Cuatro días	Siete días	Cinco días	3	0	Si	Un poco menos de lo normal	0 min	31-60 min	31-60 min	31-60 min	Sí	30-60 min	1-2 h	1-2 h	16-30 min	1-15 min	0 min	0 min	0 min	0 min	A menudo	A menudo	A menudo	De vez en cuando	De vez en cuando	A menudo	A menudo	De vez en cuando	A menudo	Nunca	Todos los dias
22	Hombre	31.25	Soltero(a)	Una o dos veces a la semana	Una o dos veces a la semana	Nunca	Una vez al mes	Una vez al mes	Una vez al mes	Dos a tres veces al mes	Una vez al mes	Todos los dias	Tres a cuatro veces por semama	Tres a cuatro veces por semama	Dos a tres veces al mes	Una o dos veces a la semana	Todos los dias	Tres dias	Siete días	Siete días	2	1	Si	Más o menos igual	31-60 min	1-10 min	11-20 min	11-20 min	No	30-60 min	1-2 h	16-30 min	30-60 min	1-2 h	0 min	0 min	1-15 min	1-15 min	De vez en cuando	Casi nunca	De vez en cuando	De vez en cuando	A menudo	De vez en cuando	A menudo	A menudo	Nunca	Una a cuatro veces por semana	Una a cuatro veces por semana
28	Hombre	22.3055	Soltero(a)	Tres a cuatro veces por semama	Una vez al mes	Nunca	Dos a tres veces al mes	Una vez al mes	Nunca	Una vez al mes	Una vez al mes	Todos los dias	Dos a tres veces al mes	Una vez al mes	Una vez al mes	Una o dos veces a la semana	Todos los dias	Siete días	Siete días	Siete días	3	2	No	Un poco más de lo normal	31-60 min	1-10 min	31-60 min	1-10 min	Sí	30-60 min	1-2 h	3-4 h	16-30 min	1-2 h	0 min	0 min	30-60 min	16-30 min	De vez en cuando	Casi nunca	Casi nunca	De vez en cuando	De vez en cuando	De vez en cuando	De vez en cuando	De vez en cuando	Casi nunca	Una a cuatro veces por semana	Una a tres veces al mes
67	Mujer	19.1111	Soltero(a)	Todos los dias	Nunca	Una vez al mes	Una vez al mes	Nunca	Nunca	Todos los dias	Nunca	Todos los dias	Todos los dias	Todos los dias	Una vez al mes	Nunca	Todos los dias	Siete días	Siete días	Siete días	3	1	No	Más o menos igual	0 min	11-20 min	21-30 min	21-30 min	Sí	30-60 min	1-2 h	30-60 min	1-2 h	0 min	0 min	1-2 h	0 min	0 min	De vez en cuando	A menudo	De vez en cuando	Muy a menudo	A menudo	Casi nunca	A menudo	A menudo	Casi nunca	Todos los dias	Nunca
47	Mujer	22.7732	Casado(a)	Una vez al mes	Nunca	Nunca	Nunca	Nunca	Nunca	Nunca	Nunca	Todos los dias	Una o dos veces a la semana	Una o dos veces a la semana	Una o dos veces a la semana	Tres a cuatro veces por semama	Todos los dias	Siete días	Siete días	Siete días	3	0	No	Más o menos igual	16-30 min	21-30 min	31-60 min	21-30 min	No	30-60 min	16-30 min	0 min	30-60 min	1-15 min	0 min	16-30 min	1-15 min	3-4 h	A menudo	De vez en cuando	A menudo	A menudo	A menudo	De vez en cuando	Muy a menudo	A menudo	Casi nunca	Una a tres veces al mes	Nunca
40	Hombre	23.3844	Soltero(a)	Dos a tres veces al mes	Nunca	Nunca	Una vez al mes	Dos a tres veces al mes	Dos a tres veces al mes	Una vez al mes	Una vez al mes	Tres a cuatro veces por semama	Dos a tres veces al mes	Una vez al mes	Una vez al mes	Todos los dias	Todos los dias	Siete días	Siete días	Un dia	2	2	Si	Un poco más de lo normal	31-60 min	21-30 min	21-30 min	0 min	Sí	30-60 min	16-30 min	0 min	3-4 h	16-30 min	0 min	1-15 min	2-3 h	16-30 min	De vez en cuando	Casi nunca	Casi nunca	Muy a menudo	Muy a menudo	Muy a menudo	Muy a menudo	Muy a menudo	Casi nunca	Una a tres veces al mes	Nunca
43	Mujer	33.3333	Casado(a)	Todos los dias	Una o dos veces a la semana	Una o dos veces a la semana	Una o dos veces a la semana	Tres a cuatro veces por semama	Una o dos veces a la semana	Una vez al mes	Dos a tres veces al mes	Tres a cuatro veces por semama	Una o dos veces a la semana	Dos a tres veces al mes	Dos a tres veces al mes	Dos a tres veces al mes	Todos los dias	Tres dias	Siete días	Siete días	2	3	No	Un poco menos de lo normal	16-30 min	21-30 min	11-20 min	11-20 min	No	30-60 min	16-30 min	0 min	1-15 min	1-15 min	0 min	0 min	0 min	0 min	De vez en cuando	De vez en cuando	De vez en cuando	De vez en cuando	De vez en cuando	De vez en cuando	De vez en cuando	De vez en cuando	De vez en cuando	Todos los dias	Una a cuatro veces por semana
25	Mujer	20.9644	Soltero(a)	Todos los dias	Nunca	Nunca	Nunca	Dos a tres veces al mes	Nunca	Una vez al mes	Nunca	Todos los dias	Una o dos veces a la semana	Una vez al mes	Nunca	Todos los dias	Todos los dias	Siete días	Siete días	Siete días	3	2	Si	Un poco más de lo normal	0 min	1-10 min	1-10 min	1-10 min	Sí	30-60 min	16-30 min	0 min	0 min	0 min	0 min	0 min	0 min	0 min	Casi nunca	Casi nunca	Muy a menudo	De vez en cuando	De vez en cuando	A menudo	Muy a menudo	De vez en cuando	Nunca	Todos los dias	Nunca
46	Mujer	25.6312	Casado(a)	Una o dos veces a la semana	Una o dos veces a la semana	Una o dos veces a la semana	Una o dos veces a la semana	Todos los dias	Una o dos veces a la semana	Una vez al mes	Dos a tres veces al mes	Todos los dias	Dos a tres veces al mes	Dos a tres veces al mes	Dos a tres veces al mes	Una o dos veces a la semana	Una o dos veces a la semana	Tres dias	Un dia	Tres dias	2	2	Si	Un poco más de lo normal	0 min	0 min	1-10 min	1-10 min	No	30-60 min	16-30 min	0 min	0 min	16-30 min	1-15 min	0 min	1-15 min	16-30 min	De vez en cuando	De vez en cuando	A menudo	A menudo	A menudo	De vez en cuando	A menudo	A menudo	De vez en cuando	Una a cuatro veces por semana	Una a cuatro veces por semana
29	Mujer	24.1415	Soltero(a)	Nunca	Nunca	Nunca	Nunca	Dos a tres veces al mes	Una vez al mes	Nunca	Una vez al mes	Todos los dias	Dos a tres veces al mes	Dos a tres veces al mes	Una vez al mes	Una vez al mes	Una o dos veces a la semana	Cinco días	Cinco días	Cinco días	5	0	Si	Mucho más de lo normal	31-60 min	Más de 1 h	Más de 1 h	11-20 min	Sí	30-60 min	16-30 min	0 min	16-30 min	30-60 min	0 min	0 min	16-30 min	0 min	De vez en cuando	Casi nunca	A menudo	De vez en cuando	De vez en cuando	De vez en cuando	De vez en cuando	A menudo	De vez en cuando	Nunca	Nunca
46	Mujer	25.2363	Soltero(a)	Una vez al mes	Una vez al mes	Nunca	Nunca	Nunca	Nunca	Nunca	Una vez al mes	Todos los dias	Una vez al mes	Una vez al mes	Nunca	Una o dos veces a la semana	Todos los dias	Siete días	Siete días	Siete días	2	2	No	Un poco menos de lo normal	0 min	21-30 min	21-30 min	21-30 min	Sí	30-60 min	16-30 min	0 min	0 min	0 min	1-15 min	0 min	0 min	0 min	Nunca	Nunca	Casi nunca	Muy a menudo	Muy a menudo	Nunca	Muy a menudo	Muy a menudo	Nunca	Una a tres veces al mes	Una a tres veces al mes
55	Mujer	23.4375	Separado(a)	Nunca	Nunca	Nunca	Nunca	Nunca	Nunca	Una vez al mes	Nunca	Todos los dias	Dos a tres veces al mes	Una vez al mes	Nunca	Tres a cuatro veces por semama	Tres a cuatro veces por semama	Siete días	Siete días	Siete días	1	0	Si	Mucho más de lo normal	16-30 min	11-20 min	21-30 min	11-20 min	Sí	30-60 min	16-30 min	0 min	16-30 min	0 min	0 min	0 min	1-15 min	0 min	De vez en cuando	De vez en cuando	Casi nunca	Casi nunca	A menudo	Casi nunca	A menudo	Casi nunca	Casi nunca	Nunca	Nunca
59	Mujer	24.6094	Separado(a)	Nunca	Nunca	Nunca	Nunca	Nunca	Nunca	Nunca	Una vez al mes	Todos los dias	Dos a tres veces al mes	Dos a tres veces al mes	Nunca	Todos los dias	Tres a cuatro veces por semama	Siete días	Siete días	Cinco días	2	0	Si	Un poco más de lo normal	0 min	1-10 min	21-30 min	1-10 min	Sí	30-60 min	16-30 min	0 min	16-30 min	30-60 min	0 min	0 min	2-3 h	3-4 h	De vez en cuando	Casi nunca	De vez en cuando	Muy a menudo	A menudo	Casi nunca	Muy a menudo	Muy a menudo	Casi nunca	Nunca	Nunca
19	Mujer	18.7962	Soltero(a)	Todos los dias	Nunca	Nunca	Todos los dias	Todos los dias	Todos los dias	Nunca	Nunca	Todos los dias	Nunca	Una vez al mes	Nunca	Nunca	Todos los dias	Siete días	Siete días	Siete días	3	2	Si	Mucho menos de lo normal	0 min	31-60 min	Más de 1 h	31-60 min	No	30-60 min	16-30 min	0 min	0 min	0 min	0 min	0 min	0 min	0 min	Nunca	Casi nunca	De vez en cuando	Muy a menudo	Muy a menudo	Casi nunca	Muy a menudo	A menudo	Casi nunca	Todos los dias	Nunca
30	Hombre	28.0102	Separado(a)	Tres a cuatro veces por semama	Todos los dias	Una vez al mes	Una vez al mes	Nunca	Una vez al mes	Nunca	Nunca	Todos los dias	Dos a tres veces al mes	Dos a tres veces al mes	Dos a tres veces al mes	Una o dos veces a la semana	Todos los dias	Siete días	Siete días	Un dia	2	2	Si	Más o menos igual	31-60 min	21-30 min	31-60 min	0 min	Sí	30-60 min	2-3 h	0 min	30-60 min	30-60 min	1-2 h	0 min	16-30 min	0 min	Casi nunca	De vez en cuando	Casi nunca	De vez en cuando	A menudo	Casi nunca	De vez en cuando	A menudo	Casi nunca	Una a cuatro veces por semana	Todos los dias
32	Mujer	30.4076	Casado(a)	Una vez al mes	Nunca	Nunca	Nunca	Una vez al mes	Una vez al mes	Nunca	Nunca	Todos los dias	Dos a tres veces al mes	Dos a tres veces al mes	Dos a tres veces al mes	Dos a tres veces al mes	Nunca	Siete días	Siete días	Siete días	3	1	No	Mucho menos de lo normal	0 min	11-20 min	21-30 min	11-20 min	No	30-60 min	2-3 h	0 min	16-30 min	30-60 min	3-4 h	3-4 h	3-4 h	3-4 h	A menudo	A menudo	Muy a menudo	De vez en cuando	De vez en cuando	De vez en cuando	De vez en cuando	De vez en cuando	De vez en cuando	Una a tres veces al mes	Nunca
30	Mujer	22.5466	Soltero(a)	Todos los dias	Nunca	Una vez al mes	Todos los dias	Todos los dias	Una o dos veces a la semana	Una vez al mes	Nunca	Todos los dias	Todos los dias	Una o dos veces a la semana	Dos a tres veces al mes	Una o dos veces a la semana	Tres a cuatro veces por semama	Siete días	Siete días	Siete días	3	2	Si	Más o menos igual	0 min	21-30 min	21-30 min	21-30 min	No	30-60 min	2-3 h	0 min	1-15 min	16-30 min	0 min	16-30 min	0 min	0 min	A menudo	A menudo	De vez en cuando	A menudo	Muy a menudo	De vez en cuando	A menudo	Casi nunca	De vez en cuando	Todos los dias	Nunca
28	Hombre	27.1739	Soltero(a)	Una o dos veces a la semana	Una o dos veces a la semana	Una vez al mes	Una vez al mes	Una vez al mes	Una vez al mes	Nunca	Nunca	Todos los dias	Dos a tres veces al mes	Dos a tres veces al mes	Una vez al mes	Tres a cuatro veces por semama	Todos los dias	Cuatro días	Siete días	Seis días	3	1	Si	Un poco menos de lo normal	31-60 min	21-30 min	21-30 min	21-30 min	Sí	30-60 min	2-3 h	0 min	16-30 min	1-2 h	0 min	1-15 min	30-60 min	30-60 min	A menudo	De vez en cuando	A menudo	De vez en cuando	A menudo	De vez en cuando	A menudo	De vez en cuando	De vez en cuando	Una a cuatro veces por semana	Una a cuatro veces por semana
62	Mujer	25.6745	Casado(a)	Una o dos veces a la semana	Tres a cuatro veces por semama	Dos a tres veces al mes	Dos a tres veces al mes	Una vez al mes	Nunca	Una vez al mes	Nunca	Todos los dias	Una o dos veces a la semana	Nunca	Una vez al mes	Una vez al mes	Todos los dias	Dos días	Siete días	Cuatro días	3	0	Si	Mucho menos de lo normal	0 min	11-20 min	21-30 min	21-30 min	No	30-60 min	2-3 h	0 min	16-30 min	1-15 min	16-30 min	0 min	0 min	0 min	De vez en cuando	De vez en cuando	Muy a menudo	A menudo	A menudo	De vez en cuando	Muy a menudo	A menudo	Casi nunca	Una a cuatro veces por semana	Una a cuatro veces por semana
46	Mujer	33.2479	Casado(a)	Todos los dias	Nunca	Dos a tres veces al mes	Una o dos veces a la semana	Tres a cuatro veces por semama	Una o dos veces a la semana	Dos a tres veces al mes	Nunca	Tres a cuatro veces por semama	Una o dos veces a la semana	Dos a tres veces al mes	Una vez al mes	Tres a cuatro veces por semama	Todos los dias	Siete días	Siete días	Cuatro días	3	2	Si	Un poco menos de lo normal	0 min	0 min	1-10 min	1-10 min	Sí	30-60 min	2-3 h	0 min	1-15 min	2-3 h	0 min	1-15 min	30-60 min	0 min	De vez en cuando	De vez en cuando	A menudo	A menudo	A menudo	De vez en cuando	A menudo	De vez en cuando	Casi nunca	Todos los dias	Nunca
30	Mujer	28.7201	Soltero(a)	Una o dos veces a la semana	Tres a cuatro veces por semama	Una o dos veces a la semana	Una o dos veces a la semana	Tres a cuatro veces por semama	Tres a cuatro veces por semama	Nunca	Una vez al mes	Todos los dias	Tres a cuatro veces por semama	Dos a tres veces al mes	Dos a tres veces al mes	Una vez al mes	Todos los dias	Cuatro días	Cuatro días	Cuatro días	3	2	Si	Más o menos igual	1-15 min	21-30 min	21-30 min	21-30 min	No	30-60 min	2-3 h	0 min	30-60 min	30-60 min	0 min	30-60 min	1-2 h	1-2 h	Muy a menudo	A menudo	A menudo	De vez en cuando	De vez en cuando	De vez en cuando	A menudo	A menudo	A menudo	Una a cuatro veces por semana	Una a cuatro veces por semana
20	Mujer	25.462	Soltero(a)	Todos los dias	Una vez al mes	Dos a tres veces al mes	Una o dos veces a la semana	Nunca	Dos a tres veces al mes	Una vez al mes	Nunca	Todos los dias	Una o dos veces a la semana	Dos a tres veces al mes	Dos a tres veces al mes	Una vez al mes	Todos los dias	Seis días	Siete días	Siete días	3	2	No	Más o menos igual	16-30 min	31-60 min	Más de 1 h	21-30 min	Sí	30-60 min	2-3 h	0 min	30-60 min	16-30 min	0 min	30-60 min	1-2 h	16-30 min	De vez en cuando	De vez en cuando	De vez en cuando	A menudo	De vez en cuando	De vez en cuando	De vez en cuando	De vez en cuando	De vez en cuando	Todos los dias	Una a tres veces al mes
25	Mujer	30.1194	Soltero(a)	Todos los dias	Una vez al mes	Dos a tres veces al mes	Dos a tres veces al mes	Dos a tres veces al mes	Dos a tres veces al mes	Una vez al mes	Nunca	Todos los dias	Tres a cuatro veces por semama	Dos a tres veces al mes	Dos a tres veces al mes	Una o dos veces a la semana	Todos los dias	Siete días	Siete días	Siete días	3	2	Si	Un poco más de lo normal	0 min	0 min	21-30 min	11-20 min	Sí	30-60 min	2-3 h	0 min	30-60 min	16-30 min	0 min	0 min	0 min	0 min	Casi nunca	Casi nunca	De vez en cuando	A menudo	A menudo	Casi nunca	A menudo	A menudo	Casi nunca	Todos los dias	Una a tres veces al mes
24	Mujer	22.806	Soltero(a)	Tres a cuatro veces por semama	Dos a tres veces al mes	Nunca	Una vez al mes	Una o dos veces a la semana	Dos a tres veces al mes	Nunca	Una o dos veces a la semana	Tres a cuatro veces por semama	Todos los dias	Dos a tres veces al mes	Tres a cuatro veces por semama	Tres a cuatro veces por semama	Una o dos veces a la semana	Seis días	Siete días	Siete días	3	1	No	Mucho más de lo normal	1-15 min	11-20 min	31-60 min	21-30 min	Sí	30-60 min	2-3 h	1-2 h	1-15 min	0 min	0 min	0 min	0 min	0 min	De vez en cuando	Muy a menudo	A menudo	De vez en cuando	Casi nunca	A menudo	A menudo	Casi nunca	Muy a menudo	Una a cuatro veces por semana	Una a tres veces al mes
21	Mujer	22.2137	Soltero(a)	Una vez al mes	Una o dos veces a la semana	Una o dos veces a la semana	Dos a tres veces al mes	Una vez al mes	Una o dos veces a la semana	Nunca	Nunca	Todos los dias	Una o dos veces a la semana	Una vez al mes	Una vez al mes	Tres a cuatro veces por semama	Una vez al mes	Cinco días	Siete días	Cinco días	2	3	Si	Más o menos igual	0 min	21-30 min	31-60 min	21-30 min	No	30-60 min	2-3 h	16-30 min	16-30 min	16-30 min	1-2 h	1-2 h	1-2 h	2-3 h	A menudo	De vez en cuando	Muy a menudo	Casi nunca	Casi nunca	De vez en cuando	De vez en cuando	Casi nunca	Muy a menudo	Una a tres veces al mes	Una a cuatro veces por semana
39	Mujer	21.0772	Casado(a)	Todos los dias	Nunca	Nunca	Nunca	Nunca	Nunca	Una o dos veces a la semana	Nunca	Todos los dias	Todos los dias	Todos los dias	Todos los dias	Todos los dias	Todos los dias	Siete días	Siete días	Siete días	3	1	Si	Más o menos igual	1-15 min	21-30 min	31-60 min	21-30 min	Sí	30-60 min	3-4 h	0 min	0 min	3-4 h	3-4 h	0 min	3-4 h	0 min	A menudo	A menudo	A menudo	A menudo	A menudo	A menudo	A menudo	De vez en cuando	De vez en cuando	Todos los dias	Nunca
24	Mujer	27.6888	Soltero(a)	Nunca	Nunca	Una vez al mes	Una o dos veces a la semana	Una vez al mes	Dos a tres veces al mes	Una vez al mes	Nunca	Todos los dias	Dos a tres veces al mes	Una vez al mes	Dos a tres veces al mes	Una vez al mes	Todos los dias	Cinco días	Cinco días	Cinco días	3	1	Si	Más o menos igual	0 min	21-30 min	21-30 min	21-30 min	Sí	30-60 min	3-4 h	0 min	16-30 min	2-3 h	0 min	16-30 min	16-30 min	0 min	Muy a menudo	Muy a menudo	Muy a menudo	De vez en cuando	Muy a menudo	Casi nunca	Muy a menudo	A menudo	De vez en cuando	Nunca	Nunca
27	Mujer	27.968	Soltero(a)	Dos a tres veces al mes	Nunca	Una vez al mes	Una vez al mes	Una vez al mes	Una vez al mes	Nunca	Una vez al mes	Todos los dias	Dos a tres veces al mes	Dos a tres veces al mes	Dos a tres veces al mes	Una vez al mes	Todos los dias	Siete días	Siete días	Siete días	3	2	Si	Más o menos igual	0 min	21-30 min	21-30 min	21-30 min	Sí	30-60 min	3-4 h	0 min	0 min	16-30 min	0 min	0 min	1-15 min	0 min	Nunca	De vez en cuando	A menudo	De vez en cuando	A menudo	De vez en cuando	A menudo	De vez en cuando	Casi nunca	Una a tres veces al mes	Nunca
25	Mujer	25.6369	Soltero(a)	Tres a cuatro veces por semama	Tres a cuatro veces por semama	Una vez al mes	Dos a tres veces al mes	Nunca	Nunca	Una vez al mes	Nunca	Todos los dias	Una o dos veces a la semana	Nunca	Una vez al mes	Una o dos veces a la semana	Todos los dias	Siete días	Siete días	Siete días	4	1	No	Mucho más de lo normal	0 min	31-60 min	31-60 min	31-60 min	Sí	30-60 min	3-4 h	0 min	1-2 h	0 min	0 min	1-2 h	0 min	0 min	De vez en cuando	De vez en cuando	De vez en cuando	De vez en cuando	De vez en cuando	Casi nunca	A menudo	De vez en cuando	Casi nunca	Una a cuatro veces por semana	Una a cuatro veces por semana
81	Hombre	32.3232	Separado(a)	Todos los dias	Nunca	Nunca	Nunca	Nunca	Nunca	Nunca	Nunca	Todos los dias	Nunca	Nunca	Nunca	Tres a cuatro veces por semama	Todos los dias	Siete días	Siete días	Siete días	3	2	No	Un poco más de lo normal	31-60 min	11-20 min	11-20 min	21-30 min	No	30-60 min	3-4 h	0 min	0 min	2-3 h	0 min	0 min	1-15 min	0 min	Casi nunca	Casi nunca	Casi nunca	A menudo	A menudo	Casi nunca	A menudo	A menudo	Casi nunca	Todos los dias	Nunca
40	Mujer	19.7239	Separado(a)	Una o dos veces a la semana	Tres a cuatro veces por semama	Una vez al mes	Dos a tres veces al mes	Dos a tres veces al mes	Una vez al mes	Nunca	Nunca	Todos los dias	Dos a tres veces al mes	Todos los dias	Una o dos veces a la semana	Dos a tres veces al mes	Todos los dias	Siete días	Siete días	Dos días	2	1	Si	Mucho más de lo normal	0 min	1-10 min	11-20 min	1-10 min	Sí	30-60 min	3-4 h	0 min	0 min	1-15 min	0 min	0 min	0 min	0 min	Casi nunca	Casi nunca	Casi nunca	Nunca	De vez en cuando	Casi nunca	Muy a menudo	A menudo	Casi nunca	Una a cuatro veces por semana	Una a cuatro veces por semana
20	Mujer	26.6728	Soltero(a)	Una o dos veces a la semana	Nunca	Nunca	Nunca	Nunca	Nunca	Una vez al mes	Una vez al mes	Todos los dias	Dos a tres veces al mes	Nunca	Una vez al mes	Tres a cuatro veces por semama	Todos los dias	Siete días	Siete días	Tres dias	2	1	Si	Mucho más de lo normal	0 min	21-30 min	21-30 min	21-30 min	Sí	30-60 min	3-4 h	0 min	30-60 min	16-30 min	0 min	0 min	30-60 min	2-3 h	A menudo	De vez en cuando	A menudo	De vez en cuando	A menudo	De vez en cuando	A menudo	De vez en cuando	Casi nunca	Una a cuatro veces por semana	Nunca
20	Mujer	24.974	Soltero(a)	Una o dos veces a la semana	Tres a cuatro veces por semama	Nunca	Dos a tres veces al mes	Dos a tres veces al mes	Dos a tres veces al mes	Una vez al mes	Una vez al mes	Todos los dias	Una o dos veces a la semana	Una vez al mes	Una vez al mes	Dos a tres veces al mes	Todos los dias	Siete días	Siete días	Siete días	3	1	Si	Más o menos igual	16-30 min	11-20 min	11-20 min	11-20 min	Sí	30-60 min	3-4 h	0 min	16-30 min	2-3 h	0 min	16-30 min	30-60 min	0 min	De vez en cuando	De vez en cuando	De vez en cuando	De vez en cuando	De vez en cuando	Casi nunca	A menudo	De vez en cuando	Casi nunca	Una a cuatro veces por semana	Una a cuatro veces por semana
29	Mujer	20.1348	Soltero(a)	Tres a cuatro veces por semama	Una vez al mes	Dos a tres veces al mes	Nunca	Una o dos veces a la semana	Una o dos veces a la semana	Una vez al mes	Nunca	Todos los dias	Dos a tres veces al mes	Todos los dias	Una o dos veces a la semana	Tres a cuatro veces por semama	Todos los dias	Siete días	Siete días	Siete días	3	1	No	Un poco más de lo normal	31-60 min	11-20 min	11-20 min	11-20 min	No	30-60 min	3-4 h	0 min	16-30 min	1-2 h	30-60 min	30-60 min	30-60 min	1-2 h	Muy a menudo	Muy a menudo	Muy a menudo	Casi nunca	Casi nunca	A menudo	De vez en cuando	Casi nunca	A menudo	Una a cuatro veces por semana	Una a tres veces al mes
24	Mujer	30.8532	Soltero(a)	Una o dos veces a la semana	Una o dos veces a la semana	Una vez al mes	Dos a tres veces al mes	Tres a cuatro veces por semama	Tres a cuatro veces por semama	Nunca	Nunca	Todos los dias	Una o dos veces a la semana	Dos a tres veces al mes	Una o dos veces a la semana	Una o dos veces a la semana	Tres a cuatro veces por semama	Siete días	Siete días	Tres dias	2	1	Si	Un poco más de lo normal	0 min	11-20 min	31-60 min	11-20 min	Sí	30-60 min	3-4 h	1-2 h	0 min	0 min	16-30 min	30-60 min	16-30 min	3-4 h	A menudo	De vez en cuando	A menudo	De vez en cuando	De vez en cuando	Casi nunca	A menudo	A menudo	Casi nunca	Una a cuatro veces por semana	Una a cuatro veces por semana
18	Mujer	23.3377	Soltero(a)	Todos los dias	Dos a tres veces al mes	Nunca	Una o dos veces a la semana	Dos a tres veces al mes	Dos a tres veces al mes	Nunca	Nunca	Todos los dias	Una o dos veces a la semana	Dos a tres veces al mes	Dos a tres veces al mes	Dos a tres veces al mes	Todos los dias	Siete días	Siete días	Siete días	3	2	No	Un poco más de lo normal	0 min	11-20 min	31-60 min	21-30 min	Sí	30-60 min	3-4 h	16-30 min	2-3 h	0 min	0 min	16-30 min	30-60 min	0 min	De vez en cuando	De vez en cuando	A menudo	A menudo	A menudo	De vez en cuando	A menudo	A menudo	Casi nunca	Todos los dias	Una a tres veces al mes
43	Hombre	27.4717	Casado(a)	Una o dos veces a la semana	Una vez al mes	Dos a tres veces al mes	Dos a tres veces al mes	Nunca	Nunca	Una vez al mes	Una vez al mes	Una o dos veces a la semana	Dos a tres veces al mes	Dos a tres veces al mes	Dos a tres veces al mes	Tres a cuatro veces por semama	Una o dos veces a la semana	Siete días	Seis días	Cuatro días	2	2	Si	Un poco más de lo normal	16-30 min	31-60 min	Más de 1 h	31-60 min	Sí	30-60 min	3-4 h	30-60 min	30-60 min	1-2 h	30-60 min	30-60 min	30-60 min	30-60 min	Casi nunca	Casi nunca	De vez en cuando	Muy a menudo	Muy a menudo	Casi nunca	Muy a menudo	A menudo	Casi nunca	Una a cuatro veces por semana	Una a tres veces al mes
32	Mujer	27.9267	Soltero(a)	Nunca	Una o dos veces a la semana	Dos a tres veces al mes	Dos a tres veces al mes	Dos a tres veces al mes	Una vez al mes	Nunca	Nunca	Todos los dias	Una vez al mes	Una vez al mes	Una vez al mes	Nunca	Todos los dias	Siete días	Siete días	Siete días	3	2	Si	Un poco más de lo normal	0 min	21-30 min	21-30 min	21-30 min	No	30-60 min	30-60 min	0 min	16-30 min	1-2 h	0 min	30-60 min	30-60 min	0 min	De vez en cuando	De vez en cuando	De vez en cuando	De vez en cuando	A menudo	De vez en cuando	Muy a menudo	A menudo	Casi nunca	Nunca	Una a cuatro veces por semana
68	Hombre	22.0522	Casado(a)	Dos a tres veces al mes	Nunca	Una vez al mes	Dos a tres veces al mes	Nunca	Una vez al mes	Nunca	Nunca	Una o dos veces a la semana	Una vez al mes	Una vez al mes	Una vez al mes	Una vez al mes	Todos los dias	Siete días	Siete días	Siete días	2	0	No	Mucho más de lo normal	0 min	21-30 min	21-30 min	11-20 min	Sí	30-60 min	30-60 min	0 min	16-30 min	0 min	0 min	0 min	1-15 min	16-30 min	Casi nunca	Nunca	De vez en cuando	Muy a menudo	Muy a menudo	Nunca	Muy a menudo	Muy a menudo	Nunca	Una a tres veces al mes	Nunca
24	Mujer	31.975	Soltero(a)	Tres a cuatro veces por semama	Nunca	Una o dos veces a la semana	Tres a cuatro veces por semama	Dos a tres veces al mes	Tres a cuatro veces por semama	Una vez al mes	Una o dos veces a la semana	Tres a cuatro veces por semama	Todos los dias	Todos los dias	Una o dos veces a la semana	Una vez al mes	Una o dos veces a la semana	Siete días	Siete días	Siete días	3	1	Si	Mucho más de lo normal	31-60 min	1-10 min	1-10 min	1-10 min	Sí	30-60 min	30-60 min	0 min	0 min	1-15 min	16-30 min	16-30 min	16-30 min	0 min	Muy a menudo	Muy a menudo	Muy a menudo	Casi nunca	De vez en cuando	Muy a menudo	Casi nunca	Casi nunca	Muy a menudo	Una a cuatro veces por semana	Nunca
66	Mujer	25.6312	Viudo(a)	Todos los dias	Nunca	Nunca	Una o dos veces a la semana	Tres a cuatro veces por semama	Una o dos veces a la semana	Una vez al mes	Nunca	Todos los dias	Todos los dias	Una vez al mes	Dos a tres veces al mes	Todos los dias	Dos a tres veces al mes	Siete días	Siete días	Siete días	3	1	Si	Un poco más de lo normal	0 min	31-60 min	31-60 min	31-60 min	No	30-60 min	30-60 min	0 min	0 min	2-3 h	0 min	1-2 h	1-2 h	16-30 min	De vez en cuando	De vez en cuando	De vez en cuando	De vez en cuando	A menudo	De vez en cuando	De vez en cuando	De vez en cuando	De vez en cuando	Todos los dias	Nunca
65	Mujer	25.3906	Casado(a)	Todos los dias	Nunca	Todos los dias	Nunca	Todos los dias	Todos los dias	Una o dos veces a la semana	Nunca	Todos los dias	Todos los dias	Una o dos veces a la semana	Dos a tres veces al mes	Nunca	Todos los dias	Siete días	Siete días	Siete días	3	2	Si	Mucho más de lo normal	Más de 1 hora	11-20 min	21-30 min	11-20 min	Sí	30-60 min	30-60 min	0 min	0 min	0 min	0 min	0 min	1-15 min	0 min	De vez en cuando	De vez en cuando	A menudo	A menudo	De vez en cuando	Casi nunca	A menudo	Nunca	De vez en cuando	Todos los dias	Nunca
33	Mujer	20.3125	Soltero(a)	Tres a cuatro veces por semama	Una vez al mes	Nunca	Nunca	Dos a tres veces al mes	Una vez al mes	Una vez al mes	Nunca	Todos los dias	Una vez al mes	Una vez al mes	Una vez al mes	Dos a tres veces al mes	Todos los dias	Siete días	Siete días	Siete días	3	1	No	Un poco menos de lo normal	0 min	21-30 min	31-60 min	21-30 min	Sí	30-60 min	30-60 min	0 min	1-15 min	1-15 min	0 min	0 min	16-30 min	0 min	De vez en cuando	Casi nunca	De vez en cuando	A menudo	A menudo	Casi nunca	A menudo	A menudo	De vez en cuando	Una a cuatro veces por semana	Una a tres veces al mes
29	Mujer	29.7521	Soltero(a)	Una o dos veces a la semana	Una o dos veces a la semana	Nunca	Nunca	Dos a tres veces al mes	Nunca	Dos a tres veces al mes	Una vez al mes	Todos los dias	Dos a tres veces al mes	Una vez al mes	Una vez al mes	Una o dos veces a la semana	Una o dos veces a la semana	Siete días	Siete días	Tres dias	3	2	Si	Un poco más de lo normal	0 min	1-10 min	11-20 min	1-10 min	No	30-60 min	30-60 min	0 min	0 min	1-15 min	1-15 min	0 min	16-30 min	0 min	A menudo	De vez en cuando	De vez en cuando	De vez en cuando	De vez en cuando	De vez en cuando	A menudo	Casi nunca	Casi nunca	Una a cuatro veces por semana	Una a cuatro veces por semana
26	Mujer	50.3063	Soltero(a)	Todos los dias	Nunca	Todos los dias	Todos los dias	Todos los dias	Todos los dias	Dos a tres veces al mes	Una vez al mes	Todos los dias	Una o dos veces a la semana	Todos los dias	Tres a cuatro veces por semama	Una o dos veces a la semana	Todos los dias	Siete días	Siete días	Siete días	3	2	No	Mucho más de lo normal	31-60 min	11-20 min	21-30 min	11-20 min	No	30-60 min	30-60 min	0 min	0 min	16-30 min	1-15 min	1-15 min	1-15 min	0 min	De vez en cuando	De vez en cuando	A menudo	De vez en cuando	De vez en cuando	De vez en cuando	A menudo	De vez en cuando	De vez en cuando	Todos los dias	Nunca
32	Mujer	20.7008	Soltero(a)	Todos los dias	Nunca	Una vez al mes	Dos a tres veces al mes	Dos a tres veces al mes	Dos a tres veces al mes	Nunca	Nunca	Todos los dias	Tres a cuatro veces por semama	Tres a cuatro veces por semama	Una vez al mes	Una vez al mes	Todos los dias	Siete días	Siete días	Siete días	3	2	Si	Un poco más de lo normal	31-60 min	31-60 min	31-60 min	31-60 min	Sí	30-60 min	30-60 min	0 min	16-30 min	0 min	0 min	0 min	16-30 min	0 min	De vez en cuando	Casi nunca	A menudo	A menudo	A menudo	Casi nunca	A menudo	A menudo	Casi nunca	Todos los dias	Nunca
21	Mujer	36.4444	Soltero(a)	Una o dos veces a la semana	Dos a tres veces al mes	Dos a tres veces al mes	Dos a tres veces al mes	Una o dos veces a la semana	Tres a cuatro veces por semama	Nunca	Nunca	Todos los dias	Dos a tres veces al mes	Una vez al mes	Una vez al mes	Dos a tres veces al mes	Todos los dias	Seis días	Siete días	Seis días	3	1	Si	Mucho más de lo normal	0 min	1-10 min	11-20 min	1-10 min	Sí	30-60 min	30-60 min	0 min	1-15 min	0 min	0 min	16-30 min	1-15 min	0 min	De vez en cuando	De vez en cuando	De vez en cuando	De vez en cuando	De vez en cuando	De vez en cuando	A menudo	Casi nunca	De vez en cuando	Una a cuatro veces por semana	Una a tres veces al mes
24	Mujer	28.4444	Soltero(a)	Tres a cuatro veces por semama	Nunca	Dos a tres veces al mes	Una o dos veces a la semana	Dos a tres veces al mes	Todos los dias	Dos a tres veces al mes	Dos a tres veces al mes	Una o dos veces a la semana	Dos a tres veces al mes	Una vez al mes	Tres a cuatro veces por semama	Una o dos veces a la semana	Todos los dias	Siete días	Siete días	Siete días	3	2	No	Un poco más de lo normal	Más de 1 hora	1-10 min	11-20 min	11-20 min	Sí	30-60 min	30-60 min	0 min	16-30 min	0 min	0 min	0 min	0 min	0 min	De vez en cuando	De vez en cuando	De vez en cuando	A menudo	A menudo	De vez en cuando	A menudo	A menudo	Casi nunca	Una a cuatro veces por semana	Nunca
32	Mujer	32.8889	Casado(a)	Una o dos veces a la semana	Una o dos veces a la semana	Nunca	Nunca	Todos los dias	Tres a cuatro veces por semama	Dos a tres veces al mes	Dos a tres veces al mes	Todos los dias	Tres a cuatro veces por semama	Una vez al mes	Una o dos veces a la semana	Dos a tres veces al mes	Todos los dias	Un dia	Un dia	Un dia	3	0	No	Un poco más de lo normal	Más de 1 hora	11-20 min	11-20 min	11-20 min	Sí	30-60 min	30-60 min	0 min	0 min	0 min	0 min	30-60 min	0 min	0 min	A menudo	Muy a menudo	Muy a menudo	De vez en cuando	De vez en cuando	De vez en cuando	De vez en cuando	Casi nunca	A menudo	Una a cuatro veces por semana	Una a cuatro veces por semana
31	Mujer	22.9421	Soltero(a)	Todos los dias	Dos a tres veces al mes	Una vez al mes	Dos a tres veces al mes	Nunca	Nunca	Nunca	Nunca	Todos los dias	Dos a tres veces al mes	Dos a tres veces al mes	Dos a tres veces al mes	Dos a tres veces al mes	Tres a cuatro veces por semama	Seis días	Seis días	Seis días	4	2	Si	Mucho más de lo normal	31-60 min	21-30 min	11-20 min	11-20 min	Sí	30-60 min	30-60 min	0 min	16-30 min	16-30 min	16-30 min	0 min	16-30 min	16-30 min	De vez en cuando	De vez en cuando	De vez en cuando	De vez en cuando	A menudo	De vez en cuando	A menudo	A menudo	Casi nunca	Todos los dias	Una a tres veces al mes
32	Mujer	27.5312	Soltero(a)	Todos los dias	Nunca	Una vez al mes	Una vez al mes	Dos a tres veces al mes	Dos a tres veces al mes	Una vez al mes	Nunca	Todos los dias	Todos los dias	Dos a tres veces al mes	Dos a tres veces al mes	Dos a tres veces al mes	Todos los dias	Un dia	Un dia	Un dia	3	2	Si	Un poco más de lo normal	0 min	31-60 min	Más de 1 h	Más de 1 h	Sí	30-60 min	30-60 min	0 min	0 min	16-30 min	16-30 min	16-30 min	16-30 min	16-30 min	De vez en cuando	De vez en cuando	Muy a menudo	A menudo	Muy a menudo	A menudo	Muy a menudo	Muy a menudo	Casi nunca	Todos los dias	Nunca
[truncated: 25 more rows]
[truncated: 34 more columns]

## Sheet: Codebook (English)
Variable	Variable
age	Age (in years)
sex	Mujer=Female
	Hombre=Male
bmi	Body mass index
ivil_status	Soltero(a)=Single
[truncated: 33 more rows]
